# Supplementary material for: Bioinformatic analysis and experimental validation of six cuproptosis-associated genes as a prognostic signature of breast cancer
Source: PeerJ journal article supplement (doi:10.7717/peerj.17419), 2024-06-18
Supplement: Experimental_raw_data.xls [file Experimental_raw_data.xls]

## Sheet: 1.Overall plan for PCR assays
Serial number	Group	Sample number	sample information		Detection of genes
1	HBCC	HCC1937	Human breast cancer cells		CLEC3A
2	HNMEC	MCF-10A	Human Normal mammary epithelial cells		KRT17
3	HBCC	MCF7	Human breast cancer cells		SAA1
4	HBCC	MDA-MV-231	Human breast cancer cells		TFF1
					IGHG1
					VAV3
Plate 1
	1	2	3	4	5	6	7	8	9	10	11	12
A	CLEC3A+ 1	CLEC3A+ 1	CLEC3A+ 1	CLEC3A+ 2	CLEC3A+ 2	CLEC3A+ 2	CLEC3A+ 3	CLEC3A+ 3	CLEC3A+ 3	CLEC3A+ 4	CLEC3A+ 4	CLEC3A+ 4
B	KRT17 + 1	KRT17 + 1	KRT17 + 1	KRT17 + 2	KRT17 + 2	KRT17 + 2	KRT17 + 3	KRT17 + 3	KRT17 + 3	KRT17 + 4	KRT17 + 4	KRT17 + 4
C	SAA1+ 1	SAA1+ 1	SAA1+ 1	SAA1+ 2	SAA1+ 2	SAA1+ 2	SAA1+ 3	SAA1+ 3	SAA1+ 3	SAA1+ 4	SAA1+ 4	SAA1+ 4
D	TFF1+ 1	TFF1+ 1	TFF1+ 1	TFF1+ 2	TFF1+ 2	TFF1+ 2	TFF1+ 3	TFF1+ 3	TFF1+ 3	TFF1+ 4	TFF1+ 4	TFF1+ 4
E	IGHG1+ 1	IGHG1+ 1	IGHG1+ 1	IGHG1+ 2	IGHG1+ 2	IGHG1+ 2	IGHG1+ 3	IGHG1+ 3	IGHG1+ 3	IGHG1+ 4	IGHG1+ 4	IGHG1+ 4
F	VAV3 + 1	VAV3 + 1	VAV3 + 1	VAV3 + 2	VAV3 + 2	VAV3 + 2	VAV3 + 3	VAV3 + 3	VAV3 + 3	VAV3 + 4	VAV3 + 4	VAV3 + 4
G	GAPDH + 1	GAPDH + 1	GAPDH + 1	GAPDH + 2	GAPDH + 2	GAPDH + 2	GAPDH + 3	GAPDH + 3	GAPDH + 3	GAPDH + 4	GAPDH + 4	GAPDH + 4
H

## Sheet: 2.Expansion curve dissolution c
Plate 1
	1	2	3	4	5	6	7	8	9	10	11	12
A	32.1005	31.3749	31.9387	32.0437	32.0346	32.0736	30.994	30.8632	31.4697	31.6963	31.9305	31.2939
B	25.4531	25.6854	25.3975	29.51	29.3477	29.3032	26.91	27.1206	27.0138	28.6324	28.6021	28.234
C	26.3206	26.1473	26.1701	28.3249	29.2412	29.129	29.2937	29.3141	29.3761	33.1906	34.8305	32.9033
D	21.21	21.2458	21.2424	26.0859	25.9242	26.0097	25.631	25.718	25.8663	26.2945	26.1425	26.3616
E	20.6828	20.5488	20.5402	20.6302	19.3703	19.5624	19.6608	19.6064	19.2656	20.087	20.2002	20.2773
F	25.2175	25.1272	25.1364	28.6055	28.1001	28.192	27.7356	27.7819	27.7043	33.0001	32.5256	31.9842
G	18.6077	18.5704	18.4941	20.4473	20.3697	20.5651	19.6867	19.3752	19.3693	20.2984	20.5186	20.8969
H
						CLEC3A
						KRT17
						SAA1
						TFF1
						IGHG1
						VAV3
						GAPDH

## Sheet: 3.Data processing
sample	CLEC3A			KRT17			SAA1			TFF1			IGHG1			VAV3				H-GAPDH				Reference Gene Mean
MCF-10A	32.1005	31.3749	31.9387	25.4531	25.6854	25.3975	26.3206	26.1473	26.1701	21.21	21.2458	21.2424	20.6828	20.5488	20.5402	25.2175	25.1272	25.1364		18.6077	18.5704	18.4941		18.5574
HCC1937	32.0437	32.0346	32.0736	29.51	29.3477	29.3032	28.3249	29.2412	29.129	26.0859	25.9242	26.0097	20.6302	19.3703	19.5624	28.6055	28.1001	28.192		20.4473	20.3697	20.5651		20.4607
MCF7	30.994	30.8632	31.4697	26.91	27.1206	27.0138	29.2937	29.3141	29.3761	25.631	25.718	25.8663	19.6608	19.6064	19.2656	27.7356	27.7819	27.7043		19.6867	19.3752	19.3693		19.4771
MDA-MB-231	31.6963	31.9305	31.2939	28.6324	28.6021	28.234	33.1906	34.8305	32.9033	26.2945	26.1425	26.3616	20.087	20.2002	20.2773	33.0001	32.5256	31.9842		20.2984	20.5186	20.8969		20.5713
	∆CT=CT目的基因-CT内参基因平均值
MCF-10A	13.5431	12.8175	13.3813	6.8957	7.12803	6.84007	7.76317	7.58987	7.61274	2.65263	2.68837	2.68503	2.12544	1.99138	1.98278	6.66006	6.56984	6.57901
HCC1937	11.583	11.5738	11.6129	9.04928	8.88694	8.8425	7.86419	8.7805	8.66823	5.62512	5.46347	5.54901	0.169512	-1.09039	-0.898356	8.14474	7.63941	7.73122
MCF7	11.517	11.3862	11.9926	7.43294	7.6435	7.53678	9.81661	9.83699	9.89906	6.15395	6.2409	6.3892	0.183705	0.129358	-0.211478	8.25849	8.30485	8.22722
MDA-MB-231	11.125	11.3592	10.7226	8.06111	8.0308	7.66272	12.6192	14.2592	12.332	5.7232	5.57119	5.79031	-0.48429	-0.371083	-0.294021	12.4288	11.9543	11.4129
	∆CT对照组平均值
MCF-10A	13.2473	13.2473	13.2473	6.9546	6.9546	6.9546	7.65526	7.65526	7.65526	2.67534	2.67534	2.67534	2.0332	2.0332	2.0332	6.60297	6.60297	6.60297
MCF-10A	13.2473	13.2473	13.2473	6.9546	6.9546	6.9546	7.65526	7.65526	7.65526	2.67534	2.67534	2.67534	2.0332	2.0332	2.0332	6.60297	6.60297	6.60297
	∆∆CT=∆CT实验组-∆CT对照组平均值
MCF-10A	0.295774	-0.429783	0.134009	-0.0588989	0.173433	-0.114534	0.10791	-0.0653902	-0.0425201	-0.0227127	0.0130286	0.00968412	0.09224	-0.0418179	-0.050422	0.0570892	-0.033132	-0.0239571
HCC1937	-1.66428	-1.67346	-1.63441	2.09468	1.93234	1.8879	0.208927	1.12524	1.01297	2.94978	2.78813	2.87367	-1.86369	-3.12359	-2.93156	1.54177	1.03644	1.12825
MCF7	-1.73032	-1.86111	-1.25466	0.47834	0.688898	0.582178	2.16135	2.18173	2.2438	3.47861	3.56556	3.71386	-1.84949	-1.90384	-2.24468	1.65552	1.70188	1.62425
MDA-MB-231	-2.12226	-1.88807	-2.52469	1.10651	1.0762	0.708121	4.96398	6.60396	4.67673	3.04785	2.89584	3.11497	-2.51749	-2.40428	-2.32722	5.82583	5.3513	4.80992
	2^-∆∆CT
MCF-10A	0.814635	1.34703	0.911296	1.04167	0.88673	1.08263	0.927931	1.04637	1.02991	1.01587	0.99101	0.99331	0.938065	1.02941	1.03557	0.961202	1.02323	1.01674
HCC1937	3.16956	3.1898	3.10461	0.23412	0.262004	0.2702	0.865181	0.458426	0.495525	0.129428	0.144773	0.13644	3.63937	8.71553	7.62932	0.343463	0.48753	0.457471
MCF7	3.31801	3.63287	2.38611	0.717803	0.620327	0.667955	0.223547	0.220412	0.21113	0.0897089	0.0844616	0.0762107	3.60374	3.74208	4.73931	0.317424	0.307385	0.324378
MDA-MB-231	4.35377	3.7014	5.75448	0.464416	0.474277	0.612117	0.03204	0.0102804	0.0390988	0.120922	0.134358	0.115426	5.72584	5.29372	5.01837	0.01763	0.0244961	0.0356507
	2^-∆∆CT Avg
	CLEC3A					KRT17					SAA1					TFF1					IGHG1					VAV3
	MCF-10A	HCC1937	MCF7	MDA-MB-231		MCF-10A	HCC1937	MCF7	MDA-MB-231		MCF-10A	HCC1937	MCF7	MDA-MB-231		MCF-10A	HCC1937	MCF7	MDA-MB-231		MCF-10A	HCC1937	MCF7	MDA-MB-231		MCF-10A	HCC1937	MCF7	MDA-MB-231
1	0.814635	3.16956	3.31801	4.35377		1.04167	0.23412	0.717803	0.464416		0.927931	0.865181	0.223547	0.03204		1.01587	0.129428	0.0897089	0.120922		0.938065	3.63937	3.60374	5.72584		0.961202	0.343463	0.317424	0.01763
2	1.34703	3.1898	3.63287	3.7014		0.88673	0.262004	0.620327	0.474277		1.04637	0.458426	0.220412	0.0102804		0.99101	0.144773	0.0844616	0.134358		1.02941	8.71553	3.74208	5.29372		1.02323	0.48753	0.307385	0.0244961
3	0.911296	3.10461	2.38611	5.75448		1.08263	0.2702	0.667955	0.612117		1.02991	0.495525	0.21113	0.0390988		0.99331	0.13644	0.0762107	0.115426		1.03557	7.62932	4.73931	5.01837		1.01674	0.457471	0.324378	0.0356507
Avg	1.02432	3.15466	3.11233	4.60322		1.00368	0.255441	0.668695	0.516937		1.0014	0.606377	0.218363	0.0271397		1.00006	0.13688	0.0834604	0.123569		1.00101	6.6614	4.02838	5.34598		1.00039	0.429488	0.316396	0.0259256
SD	0.283623	0.0445034	0.648328	1.04902		0.103327	0.0189141	0.048742	0.0825759		0.0641587	0.224897	0.00645734	0.0150211		0.013736	0.00768213	0.00680453	0.00973987		0.0546025	2.67292	0.619561	0.356619		0.0340949	0.0760008	0.00854327	0.00909504
	1.0243±0.2836	3.1547±0.0445	3.1123±0.6483	4.6032±1.04902		1.0037±0.1033	0.2554±0.0189	0.6687±0.0487	0.5169±0.0826		1.0014±0.0614	0.6064±0.2249	0.2184±0.0065	0.0271±0.0150		1.0001±0.0137	0.1369±0.0077	0.0835±0.0068	0.1236±0.0097		1.0010±0.0546	6.6614±2.6729	4.0284±0.6196	5.3460±0.3566		1.0004±0.0341	0.4295±0.0760	0.3164±0.0085	0.0259±0.0091
		MCF-10A	HCC1937	MCF7	MDA-MB-231	F-value	P-value
	CLEC3A	1.0243±0.2836	3.1547±0.0445	3.1123±0.6483	4.6032±1.04902	12.3	0.0057
	KRT17	1.0037±0.1033	0.2554±0.0189	0.6687±0.0487	0.5169±0.0826	82.01	<0.0001
	SAA1	1.0014±0.0614	0.6064±0.2249	0.2184±0.0065	0.0271±0.0150	35.24	0.0003
	TFF1	1.0001±0.0137	0.1369±0.0077	0.0835±0.0068	0.1236±0.0097	6034	<0.0001
	IGHG1	1.0010±0.0546	6.6614±2.6729	4.0284±0.6196	5.3460±0.3566	9.092	0.0199
	VAV3	1.0004±0.0341	0.4295±0.0760	0.3164±0.0085	0.0259±0.0091	395.5	<0.0001
	Note: In the figure, MCF-10A is a human normal mammary epithelial cell, and MCF7, MDA-MB-231, and HCC1937 are human breast cancer cells.
