# Supplementary material for: Bioinformatic analysis and experimental validation of six cuproptosis-associated genes as a prognostic signature of breast cancer
Source: PeerJ journal article supplement (doi:10.7717/peerj.17419), 2024-06-18
Supplement: MIQE_checklist.xls [file MIQE_checklist.xls]

## Sheet: Sheet1
ITEM TO CHECK	IMPORTANCE	CHECKLIST
EXPERIMENTAL DESIGN
Definition of experimental and control groups	E	P8 line157-158
Number within each group	E	P8 line160-161
Assay carried out by core lab or investigator's lab?	D	Not applicable
Acknowledgement of authors' contributions	D	P25 line550-553
SAMPLE
Description	E	P8 line 157-159
Volume/mass of sample processed	D	Not applicable
Microdissection or macrodissection	E	Not applicable
Processing procedure	E	P8 line 168-177
If frozen - how and how quickly?	E	Not applicable
If fixed - with what, how quickly?	E	Not applicable
Sample storage conditions and duration (especially for FFPE samples)	E	P8 line 164-168
NUCLEIC ACID EXTRACTION
Procedure and/or instrumentation	E	P8 line 168-170
Name of kit and details of any modifications	E	P8 line 168-177
Source of additional reagents used	D	P8 line 168-177
Details of DNase or RNAse treatment	E	Not applicable
Contamination assessment (DNA or RNA)	E	P8 line 175-177
Nucleic acid quantification	E	P8 line 175-177
Instrument and method	E	P8 line 168-177
Purity (A260/A280)	D	P9 line 178
Yield	D	Not applicable
RNA integrity method/instrument	E	P8 line 168-177
RIN/RQI or Cq of 3' and 5' transcripts	E	Not applicable
Electrophoresis traces	D	Not applicable
Inhibition testing (Cq dilutions, spike or other)	E	Not applicable
REVERSE TRANSCRIPTION
Complete reaction conditions	E	P9 line 182-184
Amount of RNA and reaction volume	E	P9 line 180-182
Priming oligonucleotide (if using GSP) and concentration	E	P9 line 194-195
Reverse transcriptase and concentration	E	P9 line 181
Temperature and time	E	P9 line 182-184
Manufacturer of reagents and catalogue numbers	D	P9 line 178-184
Cqs with and without RT	D*	Not applicable
Storage conditions of cDNA	D	P9 line 183-184
qPCR TARGET INFORMATION
If multiplex, efficiency and LOD of each assay.	E	Not applicable
Sequence accession number	E	Not applicable
Location of amplicon	D	Not applicable
Amplicon length	E	P9 line 185
In silico specificity screen (BLAST, etc)	E	Not applicable
Pseudogenes, retropseudogenes or other homologs?	D	Not applicable
Sequence alignment	D	Not applicable
Secondary structure analysis of amplicon	D	Not applicable
Location of each primer by exon or intron (if applicable)	E	Not applicable
What splice variants are targeted?	E	Not applicable
qPCR OLIGONUCLEOTIDES
Primer sequences	E	P9 line 194
RTPrimerDB Identification Number	D	Not applicable
Probe sequences	D**	Not applicable
Location and identity of any modifications	E	Not applicable
Manufacturer of oligonucleotides	D	Not applicable
Purification method	D	Not applicable
qPCR PROTOCOL
Complete reaction conditions	E	P9 line 189-191
Reaction volume and amount of cDNA/DNA	E	P9 line 186-187
Primer, (probe), Mg++ and dNTP concentrations	E	P9 line 195
Polymerase identity and concentration	E	Not applicable
Buffer/kit identity and manufacturer	E	P9 line 185
Exact chemical constitution of the buffer	D	Not applicable
Additives (SYBR Green I, DMSO, etc.)	E	P9 line 187
Manufacturer of plates/tubes and catalog number	D	Not applicable
Complete thermocycling parameters	E	P9 line 189-191
Reaction setup (manual/robotic)	D	Not applicable
Manufacturer of qPCR instrument	E	P9 line 185
qPCR VALIDATION
Evidence of optimisation (from gradients)	D	Not applicable
Specificity (gel, sequence, melt, or digest)	E	Not applicable
For SYBR Green I, Cq of the NTC	E	P9 line 187
Standard curves with slope and y-intercept	E	P17 line 364
PCR efficiency calculated from slope	E	P9 line 192
Confidence interval for PCR efficiency or standard error	D	Not applicable
r2 of standard curve	E	Not applicable
Linear dynamic range	E	Not applicable
Cq variation at lower limit	E	Not applicable
Confidence intervals throughout range	D	Not applicable
Evidence for limit of detection	E	Not applicable
If multiplex, efficiency and LOD of each assay.	E	Not applicable
DATA ANALYSIS
qPCR analysis program (source, version)	E	P9 line 193
Cq method determination	E	P9 line 192
Outlier identification and disposition	E	Not applicable
Results of NTCs	E	P17 line 363
Justification of number and choice of reference genes	E	P9 line 192
Description of normalisation method	E	P9 line 192
Number and concordance of biological replicates	D	Not applicable
Number and stage (RT or qPCR) of technical replicates	E	P9 line 192-193
Repeatability (intra-assay variation)	E	P9 line 192-193
Reproducibility (inter-assay variation, %CV)	D	Not applicable
Power analysis	D	Not applicable
Statistical methods for result significance	E	P9 line 194
Software (source, version)	E	P9 line 194
Cq or raw data submission using RDML	D	P17 line 364
Table 1. MIQE checklist for authors, reviewers and editors. All essential information (E) must be submitted with the manuscript. Desirable
information (D) should be submitted if available. If using primers obtained from RTPrimerDB, information on qPCR target, oligonucleotides,
protocols and validation is available from that source.
*: Assessing the absence of DNA using a no RT assay is essential when first extracting RNA. Once the sample has been validated as
RDNA-free, inclusion of a no-RT control is desirable, but no longer essential.
**: Disclosure of the probe sequence is highly desirable and strongly encouraged. However, since not all commercial pre-designed assay
vendors provide this information, it cannot be an essential requirement. Use of such assays is advised against.
