# Supplementary material for: Bioinformatic analysis and experimental validation of six cuproptosis-associated genes as a prognostic signature of breast cancer
Source: PeerJ journal article supplement (doi:10.7717/peerj.17419), 2024-06-18
Supplement: Supplementary_Table_1.xlsx [file Supplementary_Table_1.xlsx]

## Sheet: Sheet1
Supplementary Table 1 The list of cuproptosis-associated DEGs in BRCA
SAA1
GABRP
KRT17
CELSR1
PARD6B
ZG16B
SLC44A4
NAT1
ZNF552
SLC16A6
KLK6
GATA3
FSIP1
VAV3
TSPAN1
FOXA1
FDCSP
GSTP1
MYB
IGHG1
PIP
AGR2
VGLL1
PREX1
MCCC2
ARMT1
CA12
SLC39A6
TFF1
AGR3
SLC7A8
CCND1
CLEC3A
ABAT
CRABP1
ESR1
KRT16
CYP4X1
