# Supplementary material for: Bioinformatic analysis and experimental validation of six cuproptosis-associated genes as a prognostic signature of breast cancer
Source: PeerJ journal article supplement (doi:10.7717/peerj.17419), 2024-06-18
Supplement: Supplementary_Table_2.xlsx [file Supplementary_Table_2.xlsx]

## Sheet: Sheet1
Supplementary Table 2 The functional enrichment result of cuproptosis-associated DEGs in BRCA
Category	Term	Count	%	PValue	Genes	List Total	Pop Hits	Pop Total	Fold Enrichment	Bonferroni	Benjamini	FDR
GOTERM_BP_DIRECT	GO:0010039~response to iron ion	3	7.89474	0.000543793	CCND1, ABAT, TFF1	36	19	19157	84.0219	0.211991	0.220933	0.220933
GOTERM_BP_DIRECT	GO:0032355~response to estradiol	4	10.5263	0.00113988	FOXA1, CCND1, GSTP1, ESR1	36	113	19157	18.8368	0.393198	0.220933	0.220933
GOTERM_BP_DIRECT	GO:0045471~response to ethanol	4	10.5263	0.00166792	CCND1, GSTP1, ABAT, GATA3	36	129	19157	16.5004	0.51865	0.220933	0.220933
GOTERM_BP_DIRECT	GO:0006338~chromatin remodeling	4	10.5263	0.00202227	FOXA1, MYB, GATA3, ESR1	36	138	19157	15.4243	0.587967	0.220933	0.220933
GOTERM_BP_DIRECT	GO:0043627~response to estrogen	3	7.89474	0.00704565	CCND1, GATA3, ESR1	36	69	19157	23.1365	0.954812	0.599209	0.599209
GOTERM_BP_DIRECT	GO:0009410~response to xenobiotic stimulus	4	10.5263	0.00903606	VAV3, CCND1, ABAT, GATA3	36	236	19157	9.0193	0.981235	0.599209	0.599209
GOTERM_BP_DIRECT	GO:0030593~neutrophil chemotaxis	3	7.89474	0.00959832	VAV3, PREX1, SAA1	36	81	19157	19.7088	0.985365	0.599209	0.599209
GOTERM_BP_DIRECT	GO:0048646~anatomical structure formation involved in morphogenesis	2	5.26316	0.0145256	FOXA1, GATA3	36	8	19157	133.035	0.998353	0.784347	0.784347
GOTERM_BP_DIRECT	GO:0042493~response to drug	4	10.5263	0.0161536	VAV3, CCND1, ABAT, GATA3	36	293	19157	7.26469	0.999202	0.784347	0.784347
GOTERM_BP_DIRECT	GO:0042445~hormone metabolic process	2	5.26316	0.0234998	FOXA1, KLK6	36	13	19157	81.8675	0.99997	1	1
GOTERM_BP_DIRECT	GO:0007417~central nervous system development	3	7.89474	0.0287601	GSTP1, CELSR1, KLK6	36	145	19157	11.0098	0.999997	1	1
GOTERM_BP_DIRECT	GO:0060065~uterus development	2	5.26316	0.0306219	GATA3, ESR1	36	17	19157	62.6046	0.999999	1	1
GOTERM_BP_DIRECT	GO:0060749~mammary gland alveolus development	2	5.26316	0.0306219	CCND1, ESR1	36	17	19157	62.6046	0.999999	1	1
GOTERM_MF_DIRECT	GO:0002162~dystroglycan binding	2	5.26316	0.0209074	AGR2, AGR3	37	11	18765	92.2113	0.924055	1	1
GOTERM_MF_DIRECT	GO:0019899~enzyme binding	4	10.5263	0.036417	PREX1, ARMT1, CCND1, ESR1	37	382	18765	5.3106	0.989174	1	1
GOTERM_MF_DIRECT	GO:0022857~transmembrane transporter activity	3	7.89474	0.0380976	SLC44A4, SLC7A8, SLC16A6	37	161	18765	9.45023	0.991251	1	1
GOTERM_CC_DIRECT	GO:0070062~extracellular exosome	9	23.6842	0.0330812	PARD6B, IGHG1, SLC44A4, KRT16, ZG16B, GSTP1, PIP, SAA1, TSPAN1	36	2217	20163	2.27368	0.905093	1	1
GOTERM_CC_DIRECT	GO:0005615~extracellular space	8	21.0526	0.0426123	CLEC3A, IGHG1, ZG16B, GSTP1, PIP, AGR2, TFF1, KLK6	36	1906	20163	2.35082	0.95256	1	1
KEGG_PATHWAY	hsa04915:Estrogen signaling pathway	4	10.5263	0.00439694	KRT17, KRT16, TFF1, ESR1	21	138	8142	11.2381	0.339147	0.41771	0.41771
