# Supplementary material for: Bioinformatic analysis and experimental validation of six cuproptosis-associated genes as a prognostic signature of breast cancer
Source: PeerJ journal article supplement (doi:10.7717/peerj.17419), 2024-06-18
Supplement: Supplementary_Table_3.xlsx [file Supplementary_Table_3.xlsx]

## Sheet: Sheet1
Supplementary Table 3 The PC1 and PC2 values of eazh BRCA sample
	PC1	PC2
TCGA-3C-AAAU-01A	1.01125	1.93929
TCGA-3C-AALI-01A	-0.350411	0.331926
TCGA-3C-AALJ-01A	0.176872	0.90704
TCGA-3C-AALK-01A	-0.562326	-1.15119
TCGA-4H-AAAK-01A	-0.0506805	-0.473243
TCGA-5L-AAT0-01A	-0.0391284	-0.486963
TCGA-5L-AAT1-01A	-0.156642	0.000423491
TCGA-5T-A9QA-01A	2.68048	0.965215
TCGA-A1-A0SB-01A	-1.27098	0.419575
TCGA-A1-A0SD-01A	-0.820447	-1.55814
TCGA-A1-A0SE-01A	0.445974	-0.935991
TCGA-A1-A0SF-01A	0.0860895	-1.18966
TCGA-A1-A0SG-01A	0.880756	-0.324768
TCGA-A1-A0SH-01A	0.0601367	0.49334
TCGA-A1-A0SI-01A	0.0381804	0.423222
TCGA-A1-A0SJ-01A	-1.25432	-1.41845
TCGA-A1-A0SK-01A	-0.865659	2.53489
TCGA-A1-A0SM-01A	1.06815	0.407936
TCGA-A1-A0SN-01A	0.959497	0.585221
TCGA-A1-A0SO-01A	-1.08617	2.6441
TCGA-A1-A0SP-01A	-3.0148	0.161254
TCGA-A1-A0SQ-01A	-0.13551	0.606435
TCGA-A2-A04N-01A	0.641811	0.397384
TCGA-A2-A04P-01A	-1.60584	1.22846
TCGA-A2-A04Q-01A	-1.99118	-0.168075
TCGA-A2-A04R-01A	0.525881	0.178036
TCGA-A2-A04T-01A	-2.27899	1.24271
TCGA-A2-A04U-01A	-2.29221	0.775748
TCGA-A2-A04V-01A	1.67165	0.584427
TCGA-A2-A04W-01A	1.70749	1.02076
TCGA-A2-A04X-01A	0.801817	0.13714
TCGA-A2-A04Y-01A	-0.197367	-0.570141
TCGA-A2-A0CK-01A	-1.0383	-0.912399
TCGA-A2-A0CL-01A	-0.60808	-0.865293
TCGA-A2-A0CM-01A	-2.79811	1.23742
TCGA-A2-A0CO-01A	-1.14826	-1.96905
TCGA-A2-A0CP-01A	-0.131127	-1.01171
TCGA-A2-A0CQ-01A	1.45198	-0.102723
TCGA-A2-A0CR-01A	-1.86434	-1.4825
TCGA-A2-A0CS-01A	1.15405	0.778306
TCGA-A2-A0CT-01A	-0.52243	0.720807
TCGA-A2-A0CU-01A	0.0851952	0.227369
TCGA-A2-A0CV-01A	0.106701	-0.422872
TCGA-A2-A0CW-01A	1.48094	-0.281114
TCGA-A2-A0CX-01A	0.244032	0.214049
TCGA-A2-A0CY-01A	0.310471	0.0949293
TCGA-A2-A0CZ-01A	-0.606549	-0.61653
TCGA-A2-A0D0-01A	-2.26028	0.250265
TCGA-A2-A0D1-01A	0.555495	2.41013
TCGA-A2-A0D2-01A	-2.48947	0.292908
TCGA-A2-A0D3-01A	0.986824	0.0360608
TCGA-A2-A0D4-01A	-0.451767	0.223006
TCGA-A2-A0EM-01A	0.552934	-1.98427
TCGA-A2-A0EN-01A	-0.118787	-0.888463
TCGA-A2-A0EO-01A	-0.304947	-1.20541
TCGA-A2-A0EP-01A	0.0808543	-0.869674
TCGA-A2-A0EQ-01A	-0.434445	0.981015
TCGA-A2-A0ER-01A	1.1098	-0.0139166
TCGA-A2-A0ES-01A	-0.432301	-1.81576
TCGA-A2-A0ET-01A	1.28503	1.24366
TCGA-A2-A0EU-01A	0.171841	0.355543
TCGA-A2-A0EV-01A	0.258423	-0.487557
TCGA-A2-A0EW-01A	-0.551018	-2.0227
TCGA-A2-A0EX-01A	0.153095	0.198708
TCGA-A2-A0EY-01A	-0.158124	-0.454725
TCGA-A2-A0ST-01A	-2.27063	0.124748
TCGA-A2-A0SU-01A	0.211947	-0.225573
TCGA-A2-A0SV-01A	1.70558	0.107236
TCGA-A2-A0SW-01A	0.806184	-0.00651757
TCGA-A2-A0SX-01A	-2.78154	0.541791
TCGA-A2-A0SY-01A	0.423333	-0.508543
TCGA-A2-A0T0-01A	-1.4831	1.85396
TCGA-A2-A0T1-01A	-0.886322	1.05662
TCGA-A2-A0T2-01A	-1.23813	0.862322
TCGA-A2-A0T3-01A	1.01031	-0.822378
TCGA-A2-A0T4-01A	-0.156287	-1.10719
TCGA-A2-A0T5-01A	0.050026	-1.63834
TCGA-A2-A0T6-01A	0.322657	0.421435
TCGA-A2-A0T7-01A	-0.600434	-0.531169
TCGA-A2-A0YC-01A	1.77594	-1.41786
TCGA-A2-A0YD-01A	0.21127	-0.803644
TCGA-A2-A0YE-01A	-3.63213	0.313399
TCGA-A2-A0YF-01A	1.20721	-0.59103
TCGA-A2-A0YG-01A	1.15414	-0.106522
TCGA-A2-A0YH-01A	0.475054	0.424892
TCGA-A2-A0YI-01A	1.6494	-1.48001
TCGA-A2-A0YJ-01A	-0.986034	1.54611
TCGA-A2-A0YK-01A	-0.179391	-1.56545
TCGA-A2-A0YL-01A	-0.229718	-0.54432
TCGA-A2-A0YM-01A	-2.95429	0.519441
TCGA-A2-A0YT-01A	0.63169	0.705302
TCGA-A2-A1FV-01A	0.61438	0.381061
TCGA-A2-A1FW-01A	-0.200841	0.0638248
TCGA-A2-A1FX-01A	0.986946	0.328319
TCGA-A2-A1FZ-01A	0.356024	-1.57645
TCGA-A2-A1G0-01A	-0.316774	-0.220767
TCGA-A2-A1G1-01A	-2.58551	1.03972
TCGA-A2-A1G4-01A	0.600293	0.132903
TCGA-A2-A1G6-01A	-0.956818	-1.61889
TCGA-A2-A259-01A	-0.624111	-0.807671
TCGA-A2-A25A-01A	-0.150038	-1.05453
TCGA-A2-A25B-01A	1.77369	0.954593
TCGA-A2-A25C-01A	0.960461	-0.407998
TCGA-A2-A25D-01A	-0.325121	-0.226213
TCGA-A2-A25E-01A	1.47453	0.364168
TCGA-A2-A25F-01A	-1.86723	1.41633
TCGA-A2-A3KC-01A	-0.223025	-1.23425
TCGA-A2-A3KD-01A	0.395825	-0.661012
TCGA-A2-A3XS-01A	-2.48955	1.17369
TCGA-A2-A3XT-01A	-2.36503	0.679926
TCGA-A2-A3XU-01A	-1.28775	0.963394
TCGA-A2-A3XV-01A	-0.819011	1.4945
TCGA-A2-A3XW-01A	0.254421	-0.0931369
TCGA-A2-A3XX-01A	-2.63664	0.962348
TCGA-A2-A3XY-01A	-3.10837	-0.180938
TCGA-A2-A3XZ-01A	-1.40334	-0.258068
TCGA-A2-A3Y0-01A	-2.23824	-0.725282
TCGA-A2-A4RW-01A	0.718424	-0.668109
TCGA-A2-A4RX-01A	-2.86369	-0.627491
TCGA-A2-A4RY-01A	-0.647603	-2.1141
TCGA-A2-A4S0-01A	1.74906	0.590501
TCGA-A2-A4S1-01A	-0.216399	2.71382
TCGA-A2-A4S2-01A	0.237672	-1.41893
TCGA-A2-A4S3-01A	1.10559	-0.690007
TCGA-A7-A0CD-01A	0.505509	0.221672
TCGA-A7-A0CE-01A	-2.98723	-1.36799
TCGA-A7-A0CG-01A	0.871808	-2.0935
TCGA-A7-A0CH-01A	1.11103	-0.602945
TCGA-A7-A0CJ-01A	2.06487	-0.899369
TCGA-A7-A0D9-01A	-0.308735	-0.0568289
TCGA-A7-A0DA-01A	-1.50254	1.04887
TCGA-A7-A0DB-01A	1.08514	-1.81842
TCGA-A7-A0DC-01A	1.86082	1.72986
TCGA-A7-A13D-01A	-1.00697	1.57673
TCGA-A7-A13E-01A	-1.97286	0.545964
TCGA-A7-A13F-01A	2.06329	-0.123159
TCGA-A7-A13G-01B	1.33337	1.01905
TCGA-A7-A13H-01A	-0.625231	-1.44369
TCGA-A7-A26E-01A	1.22854	-0.0283545
TCGA-A7-A26F-01B	-0.698646	0.109492
TCGA-A7-A26G-01A	-1.70021	0.717759
TCGA-A7-A26H-01A	0.727232	-0.356558
TCGA-A7-A26I-01B	-1.48709	1.42779
TCGA-A7-A26J-01A	1.31599	-0.589929
TCGA-A7-A2KD-01A	1.21228	-1.14537
TCGA-A7-A3IY-01A	0.687742	-2.30982
TCGA-A7-A3IZ-01A	2.23112	1.17359
TCGA-A7-A3J0-01A	1.14753	-0.760175
TCGA-A7-A3J1-01A	0.651711	-1.9088
TCGA-A7-A3RF-01A	1.64635	0.985505
TCGA-A7-A425-01A	-0.969337	-1.87754
TCGA-A7-A426-01A	-0.444606	-1.93479
TCGA-A7-A4SA-01A	-0.11147	-1.54212
TCGA-A7-A4SB-01A	0.510695	-1.28435
TCGA-A7-A4SC-01A	1.13558	-2.14803
TCGA-A7-A4SD-01A	-3.78507	-0.207992
TCGA-A7-A4SE-01A	-2.79322	-0.296527
TCGA-A7-A4SF-01A	0.944633	0.925099
TCGA-A7-A56D-01A	-0.009542	-0.114737
TCGA-A7-A5ZV-01A	-1.27177	0.760737
TCGA-A7-A5ZW-01A	0.213805	-0.710529
TCGA-A7-A5ZX-01A	-0.540917	-1.40018
TCGA-A7-A6VV-01A	-2.36653	0.349273
TCGA-A7-A6VW-01A	-2.87046	-0.474924
TCGA-A7-A6VX-01A	1.73594	0.671229
TCGA-A7-A6VY-01A	-3.33447	0.117825
TCGA-A8-A06N-01A	1.75919	2.25075
TCGA-A8-A06O-01A	0.135339	0.337429
TCGA-A8-A06P-01A	-0.0157463	0.126921
TCGA-A8-A06Q-01A	2.70744	1.00426
TCGA-A8-A06R-01A	0.0521404	0.26513
TCGA-A8-A06T-01A	0.830102	1.79562
TCGA-A8-A06U-01A	-0.241622	0.0997997
TCGA-A8-A06X-01A	0.275744	1.58035
TCGA-A8-A06Y-01A	0.56359	1.66478
TCGA-A8-A06Z-01A	2.6617	1.15591
TCGA-A8-A075-01A	0.671734	0.778485
TCGA-A8-A076-01A	1.69652	0.107994
TCGA-A8-A079-01A	1.16195	0.469205
TCGA-A8-A07B-01A	0.815269	1.19056
TCGA-A8-A07C-01A	-2.36937	1.60078
TCGA-A8-A07E-01A	0.972874	-0.335043
TCGA-A8-A07F-01A	1.26438	0.598938
TCGA-A8-A07G-01A	0.314017	0.125857
TCGA-A8-A07I-01A	0.00938505	0.490959
TCGA-A8-A07J-01A	0.470279	0.882614
TCGA-A8-A07L-01A	0.91667	2.19671
TCGA-A8-A07O-01A	-0.158397	0.718044
TCGA-A8-A07P-01A	2.21699	-0.49328
TCGA-A8-A07R-01A	-3.0231	0.664206
TCGA-A8-A07S-01A	1.79021	0.108236
TCGA-A8-A07U-01A	-1.93416	-0.103659
TCGA-A8-A07W-01A	0.755412	0.658335
TCGA-A8-A07Z-01A	-0.095943	-0.241697
TCGA-A8-A081-01A	1.87	-0.356016
TCGA-A8-A082-01A	1.27204	2.279
TCGA-A8-A083-01A	0.762304	1.4691
TCGA-A8-A084-01A	2.47858	-0.565851
TCGA-A8-A085-01A	1.80977	2.43218
TCGA-A8-A086-01A	0.551264	0.201318
TCGA-A8-A08A-01A	1.51076	0.29532
TCGA-A8-A08B-01A	0.772968	-0.842405
TCGA-A8-A08C-01A	1.15727	1.12293
TCGA-A8-A08F-01A	1.38805	2.07838
TCGA-A8-A08G-01A	0.348545	1.46482
TCGA-A8-A08H-01A	-0.994594	1.26582
TCGA-A8-A08I-01A	0.37886	0.652283
TCGA-A8-A08J-01A	0.153947	0.530794
TCGA-A8-A08L-01A	0.651725	2.56741
TCGA-A8-A08O-01A	0.380951	-0.502276
TCGA-A8-A08P-01A	0.281531	0.261872
TCGA-A8-A08R-01A	-2.5459	1.18724
TCGA-A8-A08S-01A	1.6276	0.267942
TCGA-A8-A08T-01A	1.05102	0.352314
TCGA-A8-A08X-01A	-1.83336	1.73913
TCGA-A8-A08Z-01A	1.41293	0.75057
TCGA-A8-A090-01A	-0.208303	0.591682
TCGA-A8-A091-01A	0.0586501	1.12239
TCGA-A8-A092-01A	1.7756	-0.270483
TCGA-A8-A093-01A	1.16995	-0.273255
TCGA-A8-A094-01A	-0.618117	0.112439
TCGA-A8-A095-01A	1.54729	-1.39257
TCGA-A8-A096-01A	0.952765	0.548735
TCGA-A8-A097-01A	0.280798	-0.14809
TCGA-A8-A099-01A	2.79569	0.642541
TCGA-A8-A09A-01A	-0.0674203	-0.281877
TCGA-A8-A09B-01A	1.71613	-0.773317
TCGA-A8-A09D-01A	-0.0821648	-0.214655
TCGA-A8-A09E-01A	0.815597	-0.0693435
TCGA-A8-A09G-01A	0.595715	0.14989
TCGA-A8-A09I-01A	1.60684	-0.349268
TCGA-A8-A09K-01A	0.918856	1.52602
TCGA-A8-A09M-01A	0.825071	-0.125376
TCGA-A8-A09N-01A	1.63352	0.419782
TCGA-A8-A09Q-01A	1.53156	1.03711
TCGA-A8-A09R-01A	0.478311	0.674338
TCGA-A8-A09T-01A	1.7001	-0.428324
TCGA-A8-A09V-01A	1.52416	0.391811
TCGA-A8-A09W-01A	1.67345	1.12342
TCGA-A8-A09X-01A	-0.535507	1.4462
TCGA-A8-A09Z-01A	0.681146	2.83681
TCGA-A8-A0A1-01A	1.80078	-1.16542
TCGA-A8-A0A2-01A	0.166841	1.30734
TCGA-A8-A0A4-01A	-0.39207	-0.818507
TCGA-A8-A0A6-01A	-0.419402	-1.37003
TCGA-A8-A0A7-01A	-1.19938	1.03373
TCGA-A8-A0A9-01A	1.71711	1.02722
TCGA-A8-A0AB-01A	0.599011	0.628987
TCGA-A8-A0AD-01A	1.82466	0.540107
TCGA-AC-A23C-01A	-0.283002	-0.816446
TCGA-AC-A23E-01A	1.5629	-0.709293
TCGA-AC-A23G-01A	-0.159822	-1.07423
TCGA-AC-A23H-01A	1.75895	0.422033
TCGA-AC-A2B8-01A	0.510505	-0.905228
TCGA-AC-A2BK-01A	0.266047	2.53517
TCGA-AC-A2BM-01A	0.0585378	1.44378
TCGA-AC-A2FB-01A	0.451902	-0.945183
TCGA-AC-A2FE-01A	0.662844	-1.71174
TCGA-AC-A2FF-01A	-0.94416	-0.443383
TCGA-AC-A2FG-01A	-0.964822	-1.52698
TCGA-AC-A2FK-01A	-1.10893	-1.05117
TCGA-AC-A2FM-01A	0.156204	-1.1188
TCGA-AC-A2FO-01A	-0.584105	-1.22029
TCGA-AC-A2QH-01B	0.420154	3.45544
TCGA-AC-A2QI-01A	0.441781	-0.0962375
TCGA-AC-A2QJ-01A	-2.66764	1.12252
TCGA-AC-A3BB-01A	-0.0809852	-1.68086
TCGA-AC-A3EH-01A	1.32105	-0.34119
TCGA-AC-A3HN-01A	-0.0657168	-1.86337
TCGA-AC-A3OD-01B	0.741683	-0.185302
TCGA-AC-A3QP-01A	-0.533738	-0.773254
TCGA-AC-A3QQ-01B	1.18091	0.811524
TCGA-AC-A3TM-01A	-0.73534	-1.38132
TCGA-AC-A3TN-01A	1.1509	-1.88162
TCGA-AC-A3W5-01A	-0.159774	0.248102
TCGA-AC-A3W6-01A	1.05275	0.204344
TCGA-AC-A3W7-01A	0.60434	-2.33648
TCGA-AC-A3YI-01A	-0.852916	-1.04983
TCGA-AC-A3YJ-01A	1.20997	1.01618
TCGA-AC-A4ZE-01A	0.743026	-0.931926
TCGA-AC-A5EH-01A	0.620319	0.0595727
TCGA-AC-A5XS-01A	-0.66013	-0.968748
TCGA-AC-A5XU-01A	-1.08222	0.644217
TCGA-AC-A62V-01A	0.906655	-0.061537
TCGA-AC-A62X-01A	-2.36901	0.117057
TCGA-AC-A62Y-01A	2.18349	-1.95296
TCGA-AC-A6IV-01A	-0.621147	-1.31009
TCGA-AC-A6IW-01A	-2.41389	1.04652
TCGA-AC-A6IX-01A	-0.489361	-2.12039
TCGA-AC-A6NO-01A	0.0698335	-0.328387
TCGA-AC-A7VB-01A	0.785664	0.32552
TCGA-AC-A7VC-01A	-0.563009	2.63539
TCGA-AC-A8OP-01A	0.919445	-1.96377
TCGA-AC-A8OQ-01A	-4.00605	0.0689305
TCGA-AC-A8OR-01A	1.82556	0.32071
TCGA-AC-A8OS-01A	-0.200793	-1.99552
TCGA-AN-A03X-01A	1.52644	0.400398
TCGA-AN-A03Y-01A	1.24534	0.0501926
TCGA-AN-A041-01A	1.59507	0.577534
TCGA-AN-A046-01A	1.0965	-0.617284
TCGA-AN-A049-01A	-0.00407106	-0.237202
TCGA-AN-A04A-01A	0.786363	-1.47218
TCGA-AN-A04C-01A	-0.464512	0.212924
TCGA-AN-A04D-01A	0.264724	1.93771
TCGA-AN-A0AJ-01A	1.05608	1.08409
TCGA-AN-A0AK-01A	0.659478	1.39179
TCGA-AN-A0AL-01A	-2.26773	1.666
TCGA-AN-A0AM-01A	0.304905	-0.147599
TCGA-AN-A0AR-01A	-0.131877	2.64654
TCGA-AN-A0AS-01A	1.04289	1.11485
TCGA-AN-A0AT-01A	-3.25286	0.548595
TCGA-AN-A0FD-01A	0.379659	0.101748
TCGA-AN-A0FF-01A	1.87337	-0.445391
TCGA-AN-A0FJ-01A	-2.72899	0.963845
TCGA-AN-A0FK-01A	1.99552	-0.0659445
TCGA-AN-A0FL-01A	-0.702599	2.686
TCGA-AN-A0FN-01A	-0.382311	0.597869
TCGA-AN-A0FS-01A	0.249643	-0.239355
TCGA-AN-A0FT-01A	2.30891	-0.552855
TCGA-AN-A0FV-01A	-0.244964	1.98415
TCGA-AN-A0FW-01A	0.146734	-0.7192
TCGA-AN-A0FX-01A	-2.73229	-0.326879
TCGA-AN-A0FY-01A	1.44316	-0.541538
TCGA-AN-A0FZ-01A	1.51839	0.312308
TCGA-AN-A0G0-01A	-0.801895	1.93969
TCGA-AN-A0XL-01A	0.229472	-1.42406
TCGA-AN-A0XN-01A	0.334771	1.28421
TCGA-AN-A0XO-01A	0.80306	-1.28944
TCGA-AN-A0XP-01A	2.79687	-0.756097
TCGA-AN-A0XR-01A	2.42492	0.803142
TCGA-AN-A0XS-01A	-0.828482	-0.116931
TCGA-AN-A0XT-01A	1.21636	-0.218295
TCGA-AN-A0XU-01A	-1.86302	0.951531
TCGA-AN-A0XV-01A	0.114252	-0.0119594
TCGA-AN-A0XW-01A	-0.00520003	0.0213922
TCGA-AO-A03L-01A	-0.0287363	0.238189
TCGA-AO-A03M-01B	0.20746	-1.02743
TCGA-AO-A03N-01B	1.17476	-0.415785
TCGA-AO-A03O-01A	0.566186	0.816512
TCGA-AO-A03P-01A	-0.0203013	2.17572
TCGA-AO-A03R-01A	-0.938029	-1.5362
TCGA-AO-A03T-01A	-0.0305798	-1.06703
TCGA-AO-A03U-01B	-2.05787	-0.242001
TCGA-AO-A03V-01A	0.217791	0.208508
TCGA-AO-A0J2-01A	0.14808	1.32732
TCGA-AO-A0J3-01A	1.96749	0.971525
TCGA-AO-A0J4-01A	-3.60812	0.273699
TCGA-AO-A0J5-01A	1.09178	0.468782
TCGA-AO-A0J6-01A	-1.92818	0.573912
TCGA-AO-A0J7-01A	2.15043	-0.264244
TCGA-AO-A0J8-01A	2.30394	-0.75081
TCGA-AO-A0J9-01A	-0.487976	-1.0283
TCGA-AO-A0JA-01A	0.827427	-0.502284
TCGA-AO-A0JB-01A	-0.691342	-1.79554
TCGA-AO-A0JC-01A	-1.3066	0.339487
TCGA-AO-A0JD-01A	-0.190489	0.0156971
TCGA-AO-A0JE-01A	-0.606548	-0.605735
TCGA-AO-A0JF-01A	0.98233	-1.4858
TCGA-AO-A0JG-01A	-0.604019	0.506113
TCGA-AO-A0JI-01A	-0.0554258	0.371685
TCGA-AO-A0JJ-01A	-0.623794	-1.38672
TCGA-AO-A0JL-01A	-0.483049	1.60963
TCGA-AO-A0JM-01A	2.03353	0.480053
TCGA-AO-A124-01A	-2.73097	-0.0137732
TCGA-AO-A125-01A	3.93847	-0.166564
TCGA-AO-A126-01A	1.29884	2.01674
TCGA-AO-A128-01A	-0.791861	0.897701
TCGA-AO-A129-01A	-3.56836	-0.623587
TCGA-AO-A12A-01A	-0.0666691	-0.948216
TCGA-AO-A12B-01A	1.89898	0.175571
TCGA-AO-A12C-01A	0.958426	-0.123875
TCGA-AO-A12D-01A	-1.26835	0.561153
TCGA-AO-A12E-01A	0.0374368	-2.3156
TCGA-AO-A12F-01A	-2.07044	0.818636
TCGA-AO-A12G-01A	0.663814	0.942368
TCGA-AO-A12H-01A	1.20788	1.52632
TCGA-AO-A1KO-01A	-0.897772	-0.286245
TCGA-AO-A1KP-01A	1.37541	1.10163
TCGA-AO-A1KQ-01A	1.28161	0.322506
TCGA-AO-A1KR-01A	-2.58975	0.284767
TCGA-AO-A1KS-01A	1.6463	0.355283
TCGA-AO-A1KT-01A	0.0538135	0.355384
TCGA-AQ-A04H-01B	0.534624	1.27591
TCGA-AQ-A04J-01A	-2.43906	-0.108918
TCGA-AQ-A04L-01B	0.329169	-1.40919
TCGA-AQ-A0Y5-01A	1.71246	0.622026
TCGA-AQ-A1H2-01A	2.40896	0.918717
TCGA-AQ-A1H3-01A	-0.353039	-0.865971
TCGA-AQ-A54N-01A	-2.18206	0.50404
TCGA-AQ-A54O-01A	0.78034	0.4018
TCGA-AQ-A7U7-01A	0.187613	0.308422
TCGA-AR-A0TP-01A	0.295438	1.4063
TCGA-AR-A0TQ-01A	-0.00626464	0.197478
TCGA-AR-A0TR-01A	3.57911	-0.283666
TCGA-AR-A0TS-01A	-2.83645	0.481412
TCGA-AR-A0TT-01A	0.874137	0.0797633
TCGA-AR-A0TU-01A	-1.72616	1.69097
TCGA-AR-A0TV-01A	-0.555677	2.6493
TCGA-AR-A0TW-01A	0.904412	1.16445
TCGA-AR-A0TX-01A	-0.323574	1.47435
TCGA-AR-A0TY-01A	0.414867	0.765937
TCGA-AR-A0TZ-01A	0.979847	1.35682
TCGA-AR-A0U0-01A	-2.84624	-0.712286
TCGA-AR-A0U2-01A	1.84603	0.986435
TCGA-AR-A0U3-01A	0.86659	-0.493225
TCGA-AR-A0U4-01A	-1.48245	1.94033
TCGA-AR-A1AH-01A	-1.28374	1.1321
TCGA-AR-A1AI-01A	-2.18621	0.645006
TCGA-AR-A1AJ-01A	-1.59105	0.80886
TCGA-AR-A1AK-01A	-0.362651	-0.964011
TCGA-AR-A1AL-01A	0.624384	-0.903437
TCGA-AR-A1AM-01A	-0.575594	-0.6796
TCGA-AR-A1AN-01A	1.00256	0.0391833
TCGA-AR-A1AO-01A	-1.15704	0.0963117
TCGA-AR-A1AP-01A	0.290755	0.352343
TCGA-AR-A1AQ-01A	-2.96324	0.221318
TCGA-AR-A1AR-01A	-0.509466	0.489532
TCGA-AR-A1AS-01A	1.99535	1.28663
TCGA-AR-A1AT-01A	0.112593	1.44058
TCGA-AR-A1AU-01A	-1.38336	-0.980426
TCGA-AR-A1AV-01A	2.90367	1.07884
TCGA-AR-A1AW-01A	0.614799	0.306104
TCGA-AR-A1AX-01A	0.303331	0.128705
TCGA-AR-A1AY-01A	-1.45456	0.220483
TCGA-AR-A24H-01A	2.25514	0.569202
TCGA-AR-A24K-01A	2.09984	1.42135
TCGA-AR-A24L-01A	0.209578	0.701374
TCGA-AR-A24M-01A	1.54114	-1.13841
TCGA-AR-A24N-01A	0.225668	1.78012
TCGA-AR-A24O-01A	0.355204	-0.797978
TCGA-AR-A24P-01A	1.30865	-0.441312
TCGA-AR-A24Q-01A	-2.30292	0.264115
TCGA-AR-A24R-01A	1.31223	-0.386104
TCGA-AR-A24S-01A	1.38035	-0.574486
TCGA-AR-A24T-01A	-0.0390398	0.591937
TCGA-AR-A24U-01A	-1.1372	1.02193
TCGA-AR-A24V-01A	0.92085	1.4723
TCGA-AR-A24W-01A	-0.613946	-0.881394
TCGA-AR-A24X-01A	0.593578	-0.237854
TCGA-AR-A24Z-01A	3.3847	-1.88314
TCGA-AR-A250-01A	0.646433	-0.0745698
TCGA-AR-A251-01A	-1.50887	0.838773
TCGA-AR-A252-01A	-0.95966	-0.35314
TCGA-AR-A254-01A	0.0141548	-0.412151
TCGA-AR-A255-01A	1.09358	-1.38795
TCGA-AR-A256-01A	-1.45979	1.05141
TCGA-AR-A2LE-01A	1.59225	0.642266
TCGA-AR-A2LH-01A	-1.66097	-1.2581
TCGA-AR-A2LJ-01A	-1.55468	-1.11995
TCGA-AR-A2LK-01A	1.32768	0.571583
TCGA-AR-A2LL-01A	0.272765	0.748713
TCGA-AR-A2LM-01A	0.666092	-0.271695
TCGA-AR-A2LN-01A	-0.488299	-2.61923
TCGA-AR-A2LO-01A	-1.12585	-0.852355
TCGA-AR-A2LQ-01A	-1.91567	-0.473421
TCGA-AR-A2LR-01A	-2.32906	0.324
TCGA-AR-A5QM-01A	1.0732	-2.27376
TCGA-AR-A5QN-01A	-0.328042	-1.7808
TCGA-AR-A5QP-01A	-0.156887	-0.934391
TCGA-AR-A5QQ-01A	-3.1243	-0.868048
TCGA-B6-A0I1-01A	-2.20112	0.847467
TCGA-B6-A0I2-01A	-3.43254	-0.363409
TCGA-B6-A0I5-01A	-0.145968	-1.25635
TCGA-B6-A0I6-01A	-1.54608	0.681609
TCGA-B6-A0I8-01A	0.977577	0.892266
TCGA-B6-A0I9-01A	-0.786654	1.10929
TCGA-B6-A0IA-01A	1.96827	-1.08542
TCGA-B6-A0IB-01A	0.91059	0.328073
TCGA-B6-A0IC-01A	1.4093	1.23254
TCGA-B6-A0IE-01A	0.0455604	-1.54887
TCGA-B6-A0IG-01A	0.626417	-1.4162
TCGA-B6-A0IH-01A	-0.885377	0.162274
TCGA-B6-A0IJ-01A	-2.98067	-0.644788
TCGA-B6-A0IK-01A	-0.565384	-1.28751
TCGA-B6-A0IM-01A	0.546629	1.53981
TCGA-B6-A0IN-01A	-0.324842	-1.40766
TCGA-B6-A0IO-01A	1.4062	0.265552
TCGA-B6-A0IP-01A	-0.0960083	-0.919217
TCGA-B6-A0IQ-01A	-3.03616	1.01821
TCGA-B6-A0RE-01A	-2.68957	0.94732
TCGA-B6-A0RG-01A	0.964656	-0.213349
TCGA-B6-A0RH-01A	-0.224065	0.204517
TCGA-B6-A0RI-01A	1.08437	0.0166989
TCGA-B6-A0RL-01A	1.68436	0.914349
TCGA-B6-A0RM-01A	1.61079	2.00308
TCGA-B6-A0RN-01A	1.32532	1.22285
TCGA-B6-A0RO-01A	1.59693	-1.88219
TCGA-B6-A0RP-01A	1.81106	0.133757
TCGA-B6-A0RQ-01A	-1.60655	-1.32994
TCGA-B6-A0RS-01A	-0.647317	1.25285
TCGA-B6-A0RT-01A	-2.44867	0.684951
TCGA-B6-A0RU-01A	-0.829111	-0.314225
TCGA-B6-A0RV-01A	1.04579	-1.60032
TCGA-B6-A0WS-01A	-0.219967	-0.370377
TCGA-B6-A0WT-01A	0.350782	-0.347479
TCGA-B6-A0WV-01A	1.69314	-0.889279
TCGA-B6-A0WW-01A	1.11716	0.206398
TCGA-B6-A0WX-01A	-1.95682	0.0764333
TCGA-B6-A0WY-01A	0.304917	-1.93544
TCGA-B6-A0WZ-01A	2.90441	-0.743813
TCGA-B6-A0X0-01A	0.960795	-0.431057
TCGA-B6-A0X1-01A	-2.123	0.534942
TCGA-B6-A0X4-01A	0.682476	-0.212151
TCGA-B6-A0X5-01A	2.64893	0.30952
TCGA-B6-A0X7-01A	0.125007	-0.431136
TCGA-B6-A1KC-01B	1.53569	2.32282
TCGA-B6-A1KF-01A	0.382014	2.47275
TCGA-B6-A1KI-01A	1.10211	-0.870573
TCGA-B6-A1KN-01A	-0.0576373	-0.806878
TCGA-B6-A2IU-01A	0.977905	-0.695624
TCGA-B6-A3ZX-01A	-3.33388	0.616736
TCGA-B6-A400-01A	-3.13075	0.649794
TCGA-B6-A401-01A	-0.27018	-1.89533
TCGA-B6-A402-01A	-2.2986	1.65615
TCGA-B6-A408-01A	-0.660437	1.00111
TCGA-B6-A409-01A	-2.62781	-0.349825
TCGA-B6-A40B-01A	1.22485	-1.36082
TCGA-B6-A40C-01A	0.0907612	-1.27169
TCGA-BH-A0AU-01A	0.469698	0.343237
TCGA-BH-A0AV-01A	-3.24946	0.539338
TCGA-BH-A0AW-01A	-0.958733	-0.413817
TCGA-BH-A0AY-01A	1.34071	-0.878054
TCGA-BH-A0AZ-01A	-0.298826	-0.559463
TCGA-BH-A0B0-01A	-0.145238	-1.1469
TCGA-BH-A0B1-01A	-0.0118299	0.143103
TCGA-BH-A0B2-01A	-0.547765	-0.406795
TCGA-BH-A0B3-01A	-2.53301	0.349784
TCGA-BH-A0B4-01A	0.841518	-0.580361
TCGA-BH-A0B5-01A	-0.208358	0.22776
TCGA-BH-A0B6-01A	-0.697867	1.20548
TCGA-BH-A0B7-01A	-0.952934	-0.88472
TCGA-BH-A0B8-01A	-0.139701	-0.912238
TCGA-BH-A0B9-01A	-1.88664	0.376179
TCGA-BH-A0BA-01A	-1.05176	-0.897295
TCGA-BH-A0BC-01A	0.401458	-1.42006
TCGA-BH-A0BD-01A	-0.775864	-0.433499
TCGA-BH-A0BF-01A	-0.207203	-0.422151
TCGA-BH-A0BG-01A	-2.68231	0.863791
TCGA-BH-A0BJ-01A	0.0242686	-0.591548
TCGA-BH-A0BL-01A	-2.38682	-0.234007
TCGA-BH-A0BM-01A	-0.32027	-2.29156
TCGA-BH-A0BO-01A	-0.691622	-2.02173
TCGA-BH-A0BP-01A	0.25556	-2.32906
TCGA-BH-A0BQ-01A	-0.486586	-0.77829
TCGA-BH-A0BR-01A	0.509611	-0.37396
TCGA-BH-A0BT-01A	0.8214	-0.686121
TCGA-BH-A0BV-01A	2.5348	-1.00326
TCGA-BH-A0BW-01A	-1.93846	0.55979
TCGA-BH-A0BZ-01A	-0.756823	0.415548
TCGA-BH-A0C0-01A	-0.836401	0.812533
TCGA-BH-A0C1-01B	1.4411	0.822081
TCGA-BH-A0C3-01A	0.568752	0.217773
TCGA-BH-A0C7-01B	1.92584	-2.01084
TCGA-BH-A0DD-01A	1.7275	1.32466
TCGA-BH-A0DE-01A	-0.950379	-1.53353
TCGA-BH-A0DG-01A	-0.382494	-0.654066
TCGA-BH-A0DH-01A	0.620235	-1.93372
TCGA-BH-A0DI-01A	-1.18471	0.000795863
TCGA-BH-A0DK-01A	-1.89891	-0.828904
TCGA-BH-A0DL-01A	-2.06026	-0.408482
TCGA-BH-A0DO-01B	0.657041	-2.71508
TCGA-BH-A0DP-01A	-0.256678	-1.32441
TCGA-BH-A0DQ-01A	0.00251382	-1.05889
TCGA-BH-A0DS-01A	-0.643835	0.501299
TCGA-BH-A0DT-01A	-0.209738	-0.955569
TCGA-BH-A0DV-01A	-0.459875	-0.128384
TCGA-BH-A0DX-01A	-0.651666	0.121062
TCGA-BH-A0DZ-01A	1.21311	-1.49162
TCGA-BH-A0E0-01A	-0.539358	0.352807
TCGA-BH-A0E1-01A	1.71135	-1.53737
TCGA-BH-A0E2-01A	-0.0510497	-0.633516
TCGA-BH-A0E6-01A	-3.81629	-0.335457
TCGA-BH-A0E7-01A	2.11667	1.40494
TCGA-BH-A0E9-01B	-0.786573	-1.46855
TCGA-BH-A0EA-01A	-1.60712	-1.52819
TCGA-BH-A0EB-01A	1.0492	-0.856297
TCGA-BH-A0EE-01A	-0.0369554	1.02969
TCGA-BH-A0EI-01A	-0.13776	1.371
TCGA-BH-A0GY-01A	-0.890737	-0.221159
TCGA-BH-A0GZ-01A	0.196919	-1.02372
TCGA-BH-A0H0-01A	0.319934	1.16269
TCGA-BH-A0H3-01A	-0.478521	0.408136
TCGA-BH-A0H5-01A	-0.652886	-0.753838
TCGA-BH-A0H6-01A	0.85783	0.353735
TCGA-BH-A0H7-01A	0.658233	0.793992
TCGA-BH-A0H9-01A	1.21251	-1.83494
TCGA-BH-A0HA-01A	0.35446	-0.812992
TCGA-BH-A0HB-01A	-0.0554813	-1.2884
TCGA-BH-A0HF-01A	-0.183639	-2.18575
TCGA-BH-A0HI-01A	1.74182	-0.505336
TCGA-BH-A0HK-01A	-0.809264	-1.70671
TCGA-BH-A0HL-01A	1.43837	1.28855
TCGA-BH-A0HN-01A	2.28457	1.2197
TCGA-BH-A0HO-01A	1.48949	0.571468
TCGA-BH-A0HP-01A	-0.281548	-0.438053
TCGA-BH-A0HQ-01A	0.769263	-1.46659
TCGA-BH-A0HU-01A	1.72181	-0.954738
TCGA-BH-A0HW-01A	0.891063	2.35566
TCGA-BH-A0HX-01A	0.0831195	-0.412858
TCGA-BH-A0HY-01A	0.622582	0.104799
TCGA-BH-A0RX-01A	-2.515	0.0977403
TCGA-BH-A0W3-01A	3.10319	-0.403567
TCGA-BH-A0W4-01A	-0.505717	-1.12197
TCGA-BH-A0W5-01A	0.0926495	-0.838285
TCGA-BH-A0W7-01A	-0.378944	-0.371087
TCGA-BH-A0WA-01A	-2.60193	0.131457
TCGA-BH-A18F-01A	-0.664763	-1.75423
TCGA-BH-A18G-01A	-0.732057	2.10799
TCGA-BH-A18H-01A	-0.135943	-0.470405
TCGA-BH-A18I-01A	-0.161032	-0.926175
TCGA-BH-A18J-01A	1.67851	-1.42238
TCGA-BH-A18K-01A	1.48765	-0.703023
TCGA-BH-A18L-01A	0.395115	-0.192138
TCGA-BH-A18M-01A	0.701669	-1.49646
TCGA-BH-A18N-01A	0.444422	2.35042
TCGA-BH-A18P-01A	0.502047	-0.430508
TCGA-BH-A18Q-01A	-2.20623	-0.727045
TCGA-BH-A18R-01A	-0.224664	0.487014
TCGA-BH-A18S-01A	2.28168	-0.309796
TCGA-BH-A18T-01A	-0.592826	1.70818
TCGA-BH-A18U-01A	0.670188	0.771837
TCGA-BH-A18V-01A	-3.21861	0.514045
TCGA-BH-A1EN-01A	0.911906	1.65933
TCGA-BH-A1EO-01A	1.66806	1.01151
TCGA-BH-A1ES-01A	-0.0548215	0.0235728
TCGA-BH-A1ET-01A	1.47945	-0.375096
TCGA-BH-A1EU-01A	0.967626	-2.12919
TCGA-BH-A1EV-01A	1.84566	-0.176811
TCGA-BH-A1EW-01A	0.47831	-0.382321
TCGA-BH-A1EX-01A	1.31732	-0.550675
TCGA-BH-A1EY-01A	1.51388	0.928859
TCGA-BH-A1F0-01A	-2.59382	0.191659
TCGA-BH-A1F2-01A	1.29648	0.516054
TCGA-BH-A1F5-01A	1.70999	1.14069
TCGA-BH-A1F6-01A	-3.34174	0.642531
TCGA-BH-A1F8-01A	0.733745	1.89667
TCGA-BH-A1FB-01A	-0.480544	-0.991259
TCGA-BH-A1FC-01A	-2.48992	2.01429
TCGA-BH-A1FD-01A	1.23964	1.62074
TCGA-BH-A1FE-01A	0.188618	0.323994
TCGA-BH-A1FG-01A	1.37825	-0.154951
TCGA-BH-A1FH-01A	-0.58357	0.0224644
TCGA-BH-A1FJ-01A	1.87571	0.437446
TCGA-BH-A1FL-01A	0.775173	-0.196665
TCGA-BH-A1FM-01A	2.00326	1.66758
TCGA-BH-A1FN-01A	1.77325	0.729094
TCGA-BH-A1FR-01A	0.853621	0.105888
TCGA-BH-A1FU-01A	-1.27981	0.532459
TCGA-BH-A201-01A	-0.501916	-1.31313
TCGA-BH-A202-01A	1.4029	0.480253
TCGA-BH-A203-01A	0.108143	0.447544
TCGA-BH-A204-01A	3.00011	1.22824
TCGA-BH-A208-01A	-1.87804	0.77842
TCGA-BH-A209-01A	0.0708124	0.612934
TCGA-BH-A28O-01A	-1.54081	-1.57406
TCGA-BH-A28Q-01A	1.12338	0.806428
TCGA-BH-A2L8-01A	-0.571638	0.274142
TCGA-BH-A42T-01A	0.719713	-1.10589
TCGA-BH-A42U-01A	-2.16866	-2.73684
TCGA-BH-A42V-01A	-1.55291	-1.08876
TCGA-BH-A5IZ-01A	-3.9079	-0.783978
TCGA-BH-A5J0-01A	-0.288608	-0.202834
TCGA-BH-A6R8-01A	0.77103	0.429941
TCGA-BH-A6R9-01A	-3.09178	0.318243
TCGA-BH-A8FY-01A	1.96511	-0.982337
TCGA-BH-A8FZ-01A	-0.669731	-1.52224
TCGA-BH-A8G0-01A	-0.413622	-0.910815
TCGA-BH-AB28-01A	0.274776	-0.362856
TCGA-C8-A12K-01A	-2.1757	0.669089
TCGA-C8-A12L-01A	-0.851897	-1.01512
TCGA-C8-A12M-01A	1.47858	1.95267
TCGA-C8-A12N-01A	1.41861	0.573927
TCGA-C8-A12O-01A	-0.14495	0.447782
TCGA-C8-A12P-01A	-0.172426	1.97619
TCGA-C8-A12Q-01A	-0.171759	-0.0373666
TCGA-C8-A12T-01A	0.3927	0.311403
TCGA-C8-A12U-01A	1.18991	1.08059
TCGA-C8-A12V-01A	-2.37854	0.618886
TCGA-C8-A12W-01A	0.26404	0.136676
TCGA-C8-A12X-01A	1.20577	0.739473
TCGA-C8-A12Y-01A	0.40405	-1.221
TCGA-C8-A12Z-01A	1.02166	0.205609
TCGA-C8-A130-01A	0.00232363	0.74633
TCGA-C8-A131-01A	-2.5371	-0.451085
TCGA-C8-A132-01A	0.105319	-1.87898
TCGA-C8-A133-01A	0.722688	1.69474
TCGA-C8-A134-01A	-1.77458	0.277412
TCGA-C8-A135-01A	-1.37627	0.809712
TCGA-C8-A137-01A	0.956736	1.90521
TCGA-C8-A138-01A	-1.13934	-0.426347
TCGA-C8-A1HE-01A	1.41184	-0.668152
TCGA-C8-A1HF-01A	-0.724785	1.62476
TCGA-C8-A1HG-01A	0.447322	0.265472
TCGA-C8-A1HI-01A	0.46799	-2.2345
TCGA-C8-A1HJ-01A	-2.30601	1.23968
TCGA-C8-A1HK-01A	1.25486	0.875452
TCGA-C8-A1HL-01A	2.4234	0.182655
TCGA-C8-A1HM-01A	1.13916	0.510252
TCGA-C8-A1HN-01A	1.56553	2.21777
TCGA-C8-A1HO-01A	2.21257	1.0395
TCGA-C8-A26V-01A	0.238727	0.632474
TCGA-C8-A26W-01A	0.660664	0.147629
TCGA-C8-A26X-01A	-1.9749	0.314993
TCGA-C8-A26Y-01A	-0.284508	0.719584
TCGA-C8-A26Z-01A	1.89646	0.577043
TCGA-C8-A273-01A	0.383743	-0.226183
TCGA-C8-A274-01A	3.3286	-0.118419
TCGA-C8-A275-01A	-0.0564696	0.51197
TCGA-C8-A278-01A	-0.446086	0.659229
TCGA-C8-A27A-01A	2.05038	0.244415
TCGA-C8-A27B-01A	-2.77891	0.65777
TCGA-C8-A3M7-01A	-0.986196	-0.580015
TCGA-C8-A3M8-01A	1.59282	-0.898549
TCGA-C8-A8HP-01A	-0.840827	-1.39316
TCGA-C8-A8HQ-01A	-0.275409	0.897318
TCGA-C8-A8HR-01A	-0.51744	-0.787307
TCGA-D8-A13Y-01A	1.36284	2.36367
TCGA-D8-A13Z-01A	-0.542733	-0.182595
TCGA-D8-A140-01A	-0.0966292	0.852049
TCGA-D8-A141-01A	0.896695	-0.0911876
TCGA-D8-A142-01A	-2.81807	1.49193
TCGA-D8-A143-01A	-1.49504	0.525867
TCGA-D8-A145-01A	0.357693	-1.75807
TCGA-D8-A146-01A	-0.0685297	-1.4348
TCGA-D8-A147-01A	-2.02533	0.299377
TCGA-D8-A1J8-01A	1.47734	0.656387
TCGA-D8-A1J9-01A	1.26493	1.02834
TCGA-D8-A1JA-01A	1.65986	1.47939
TCGA-D8-A1JB-01A	-0.0120095	-1.95204
TCGA-D8-A1JC-01A	0.467673	0.00782903
TCGA-D8-A1JD-01A	0.565438	0.665763
TCGA-D8-A1JE-01A	2.75275	0.324237
TCGA-D8-A1JF-01A	-0.76101	2.26951
TCGA-D8-A1JG-01B	-0.744163	1.46134
TCGA-D8-A1JH-01A	0.643927	-0.50825
TCGA-D8-A1JI-01A	2.94468	-0.382733
TCGA-D8-A1JJ-01A	2.56493	-0.130015
TCGA-D8-A1JK-01A	-1.72055	0.88367
TCGA-D8-A1JL-01A	-0.880263	1.00002
TCGA-D8-A1JM-01A	-0.795618	1.86022
TCGA-D8-A1JN-01A	1.03897	0.69184
TCGA-D8-A1JP-01A	-0.33048	0.0635224
TCGA-D8-A1JS-01A	2.51201	0.632848
TCGA-D8-A1JT-01A	1.69761	0.693167
TCGA-D8-A1JU-01A	0.751665	0.825359
TCGA-D8-A1X5-01A	2.52272	0.330309
TCGA-D8-A1X6-01A	1.64116	2.28384
TCGA-D8-A1X7-01A	1.5447	0.424221
TCGA-D8-A1X8-01A	1.56081	-0.610017
TCGA-D8-A1X9-01A	0.861782	1.22037
TCGA-D8-A1XA-01A	0.0415116	1.01493
TCGA-D8-A1XB-01A	0.913378	-0.104664
TCGA-D8-A1XC-01A	3.30573	-0.241246
TCGA-D8-A1XD-01A	-0.00507311	0.574074
TCGA-D8-A1XF-01A	0.348796	0.647809
TCGA-D8-A1XG-01A	0.76504	-2.11804
TCGA-D8-A1XJ-01A	1.74086	1.00742
TCGA-D8-A1XK-01A	-2.98013	0.770416
TCGA-D8-A1XL-01A	-0.113247	1.77878
TCGA-D8-A1XM-01A	0.220786	-1.35412
TCGA-D8-A1XO-01A	2.22546	0.122782
TCGA-D8-A1XQ-01A	-2.73903	1.48595
TCGA-D8-A1XR-01A	1.76564	0.471741
TCGA-D8-A1XS-01A	0.514706	1.15246
TCGA-D8-A1XT-01A	0.817604	2.53109
TCGA-D8-A1XU-01A	1.08918	-1.03036
TCGA-D8-A1XV-01A	2.52791	-0.284447
TCGA-D8-A1XW-01A	-0.642647	1.19921
TCGA-D8-A1XY-01A	1.77894	-0.319508
TCGA-D8-A1XZ-01A	1.10108	0.473028
TCGA-D8-A1Y0-01A	0.155654	1.237
TCGA-D8-A1Y1-01A	1.82032	1.54602
TCGA-D8-A1Y2-01A	0.404325	0.306455
TCGA-D8-A1Y3-01A	0.129118	2.3526
TCGA-D8-A27E-01A	1.59179	0.1425
TCGA-D8-A27F-01A	-2.9731	-0.295736
TCGA-D8-A27G-01A	1.88176	0.546742
TCGA-D8-A27H-01A	-2.96346	0.872584
TCGA-D8-A27I-01A	-0.795858	-1.04571
TCGA-D8-A27K-01A	0.238924	-0.389744
TCGA-D8-A27L-01A	-0.182346	-0.0240675
TCGA-D8-A27M-01A	-3.14931	0.392749
TCGA-D8-A27N-01A	0.472828	-1.00396
TCGA-D8-A27P-01A	0.794535	-1.56402
TCGA-D8-A27R-01A	0.644263	0.326782
TCGA-D8-A27T-01A	0.764313	1.02729
TCGA-D8-A27V-01A	1.26066	-0.763585
TCGA-D8-A27W-01A	-0.225428	0.485274
TCGA-D8-A3Z5-01A	-0.414268	-2.27607
TCGA-D8-A3Z6-01A	1.77303	-1.85716
TCGA-D8-A4Z1-01A	-0.209291	-1.88981
TCGA-D8-A73U-01A	0.48285	-0.82178
TCGA-D8-A73W-01A	1.48681	0.102414
TCGA-D8-A73X-01A	1.15346	-0.798092
TCGA-E2-A105-01A	0.569014	0.470724
TCGA-E2-A106-01A	1.13562	-0.895727
TCGA-E2-A107-01A	0.50062	-0.621686
TCGA-E2-A108-01A	-2.22509	-1.25843
TCGA-E2-A109-01A	1.23599	0.510073
TCGA-E2-A10A-01A	1.20781	0.862212
TCGA-E2-A10B-01A	0.934553	-1.38164
TCGA-E2-A10C-01A	2.84656	-0.301854
TCGA-E2-A10E-01A	1.45076	-1.62134
TCGA-E2-A10F-01A	0.160603	-0.222494
TCGA-E2-A14N-01A	-0.79597	1.08405
TCGA-E2-A14O-01A	2.25001	-0.216935
TCGA-E2-A14P-01A	-1.74649	0.26665
TCGA-E2-A14Q-01A	0.17769	-1.26345
TCGA-E2-A14R-01A	-2.06022	1.21972
TCGA-E2-A14T-01A	-0.0844272	-0.49653
TCGA-E2-A14U-01A	-0.674975	-2.38335
TCGA-E2-A14V-01A	0.307941	-0.0310045
TCGA-E2-A14W-01A	1.61849	2.18001
TCGA-E2-A14X-01A	-3.04042	1.07143
TCGA-E2-A14Y-01A	-2.85468	0.252416
TCGA-E2-A14Z-01A	0.650664	-0.633397
TCGA-E2-A150-01A	-1.52204	0.0661188
TCGA-E2-A152-01A	1.32366	0.842753
TCGA-E2-A153-01A	1.52118	-0.403204
TCGA-E2-A154-01A	2.62308	-0.415326
TCGA-E2-A155-01A	1.09526	1.59658
TCGA-E2-A156-01A	2.38848	0.555524
TCGA-E2-A158-01A	-2.18847	1.23098
TCGA-E2-A159-01A	-1.63279	0.363679
TCGA-E2-A15A-01A	0.770297	0.749797
TCGA-E2-A15C-01A	0.385158	-0.560959
TCGA-E2-A15D-01A	0.399634	0.714086
TCGA-E2-A15E-01A	0.0684636	-1.40764
TCGA-E2-A15F-01A	-0.462323	-0.159495
TCGA-E2-A15G-01A	3.00813	-0.489981
TCGA-E2-A15H-01A	0.618476	-0.208486
TCGA-E2-A15I-01A	0.453642	0.466639
TCGA-E2-A15J-01A	2.13088	1.19226
TCGA-E2-A15K-01A	1.93962	-0.570551
TCGA-E2-A15L-01A	0.683722	0.0367129
TCGA-E2-A15M-01A	0.484273	-1.71759
TCGA-E2-A15O-01A	1.21082	-0.147903
TCGA-E2-A15P-01A	0.238164	-0.61373
TCGA-E2-A15R-01A	1.65907	0.601524
TCGA-E2-A15S-01A	0.882209	1.13139
TCGA-E2-A15T-01A	1.83533	-0.659889
TCGA-E2-A1AZ-01A	-2.11031	1.24621
TCGA-E2-A1B0-01A	-1.39034	0.832471
TCGA-E2-A1B1-01A	-0.310366	-1.3392
TCGA-E2-A1B4-01A	1.32494	-1.46742
TCGA-E2-A1B5-01A	-0.468201	-2.10186
TCGA-E2-A1B6-01A	-2.61641	-0.0467554
TCGA-E2-A1BC-01A	-0.672565	-0.376532
TCGA-E2-A1BD-01A	0.838198	-0.0559226
TCGA-E2-A1IE-01A	1.00748	-0.543405
TCGA-E2-A1IF-01A	-0.445298	-2.06065
TCGA-E2-A1IG-01A	0.68051	-0.725132
TCGA-E2-A1IH-01A	-0.574076	0.907744
TCGA-E2-A1II-01A	-1.35544	2.42671
TCGA-E2-A1IJ-01A	0.340387	-1.17387
TCGA-E2-A1IK-01A	0.843383	-1.73469
TCGA-E2-A1IL-01A	-0.430815	-0.513279
TCGA-E2-A1IN-01A	0.856994	0.592695
TCGA-E2-A1IO-01A	-0.113686	-0.275484
TCGA-E2-A1IU-01A	0.260382	-1.77667
TCGA-E2-A1L6-01A	1.67931	-2.18554
TCGA-E2-A1L7-01A	0.194643	-0.257091
TCGA-E2-A1L8-01A	0.190578	-1.02591
TCGA-E2-A1L9-01A	0.690241	-0.127226
TCGA-E2-A1LA-01A	-2.14378	0.466964
TCGA-E2-A1LB-01A	0.566558	2.33532
TCGA-E2-A1LE-01A	0.339459	0.905331
TCGA-E2-A1LG-01A	-2.3562	0.304653
TCGA-E2-A1LH-01A	-4.29556	-0.310883
TCGA-E2-A1LI-01A	-3.19262	0.407398
TCGA-E2-A1LK-01A	-2.89472	0.372592
TCGA-E2-A1LL-01A	-1.80703	-0.246948
TCGA-E2-A1LS-01A	-1.16061	0.102049
TCGA-E2-A2P5-01A	0.431079	0.837558
TCGA-E2-A2P6-01A	0.990219	-1.03238
TCGA-E2-A3DX-01A	0.0395482	-0.201305
TCGA-E2-A56Z-01A	0.380953	-0.164612
TCGA-E2-A570-01A	0.544295	-0.00950195
TCGA-E2-A572-01A	-1.09263	-1.49708
TCGA-E2-A573-01A	-3.58798	-0.427521
TCGA-E2-A574-01A	-2.38424	0.920423
TCGA-E2-A576-01A	-0.668662	-0.492693
TCGA-E2-A9RU-01A	0.786531	0.848779
TCGA-E9-A1N3-01A	1.44129	-0.686137
TCGA-E9-A1N4-01A	0.918587	0.326009
TCGA-E9-A1N5-01A	1.88559	1.14508
TCGA-E9-A1N6-01A	1.37117	0.675533
TCGA-E9-A1N8-01A	-1.58169	1.15399
TCGA-E9-A1N9-01A	0.249029	0.297324
TCGA-E9-A1NA-01A	1.59042	1.51613
TCGA-E9-A1NC-01A	-4.23472	-0.000129136
TCGA-E9-A1ND-01A	-2.99953	-0.282868
TCGA-E9-A1NE-01A	-0.129614	-1.19602
TCGA-E9-A1NF-01A	1.52753	1.18
TCGA-E9-A1NG-01A	0.536921	-0.83584
TCGA-E9-A1NH-01A	1.06257	-0.61596
TCGA-E9-A1NI-01A	2.28173	0.724836
TCGA-E9-A1QZ-01A	-1.59078	-1.01532
TCGA-E9-A1R0-01A	-0.537267	-1.35826
TCGA-E9-A1R2-01A	-0.255554	-0.123737
TCGA-E9-A1R3-01A	-0.32401	-0.363042
TCGA-E9-A1R4-01A	1.23152	-0.216584
TCGA-E9-A1R5-01A	0.405257	1.34546
TCGA-E9-A1R6-01A	1.23022	1.94663
TCGA-E9-A1R7-01A	0.326692	1.82529
TCGA-E9-A1RA-01A	0.41572	0.1282
TCGA-E9-A1RB-01A	0.897451	0.282173
TCGA-E9-A1RC-01A	1.40101	1.52411
TCGA-E9-A1RD-01A	1.55775	0.569733
TCGA-E9-A1RE-01A	1.43217	-0.0525506
TCGA-E9-A1RF-01A	0.507791	0.0282671
TCGA-E9-A1RG-01A	0.530882	0.409637
TCGA-E9-A1RH-01A	-0.491946	1.32077
TCGA-E9-A1RI-01A	0.668605	0.281215
TCGA-E9-A226-01A	1.47627	0.409853
TCGA-E9-A227-01A	1.00728	-0.995491
TCGA-E9-A228-01A	2.89688	1.15905
TCGA-E9-A229-01A	0.864057	-0.512344
TCGA-E9-A22A-01A	-0.2272	0.063393
TCGA-E9-A22B-01A	-0.386459	-0.281756
TCGA-E9-A22D-01A	0.656123	0.930032
TCGA-E9-A22E-01A	0.799308	1.0449
TCGA-E9-A22G-01A	-1.01767	1.21066
TCGA-E9-A22H-01A	2.48483	-0.154528
TCGA-E9-A243-01A	-2.87121	-0.485754
TCGA-E9-A244-01A	-3.15625	0.57161
TCGA-E9-A245-01A	1.67843	-0.702157
TCGA-E9-A247-01A	0.455023	-0.474734
TCGA-E9-A248-01A	-0.717279	1.67209
TCGA-E9-A249-01A	2.24647	1.05601
TCGA-E9-A24A-01A	1.94223	0.5568
TCGA-E9-A295-01A	0.905714	-0.710365
TCGA-E9-A2JS-01A	1.94726	-0.368744
TCGA-E9-A2JT-01A	-0.844734	-0.644257
TCGA-E9-A3HO-01A	1.68105	-0.411395
TCGA-E9-A3Q9-01A	0.153861	-0.930744
TCGA-E9-A3QA-01A	-2.28342	0.493104
TCGA-E9-A3X8-01A	-0.713619	-1.90961
TCGA-E9-A54X-01A	2.75008	-0.0684886
TCGA-E9-A54Y-01A	0.999228	0.197312
TCGA-E9-A5FK-01A	-0.731179	-2.16205
TCGA-E9-A5FL-01A	-2.40635	-0.944225
TCGA-E9-A5UO-01A	1.63484	2.14328
TCGA-E9-A5UP-01A	1.01775	2.08898
TCGA-E9-A6HE-01A	-0.4878	-0.428869
TCGA-EW-A1IW-01A	-0.766559	-1.57263
TCGA-EW-A1IX-01A	1.16342	-0.3535
TCGA-EW-A1IY-01A	0.424644	0.576584
TCGA-EW-A1IZ-01A	-0.416749	-1.01569
TCGA-EW-A1J1-01A	0.873344	1.69489
TCGA-EW-A1J2-01A	0.328664	-1.44917
TCGA-EW-A1J3-01A	1.41218	-0.293938
TCGA-EW-A1J5-01A	0.686909	0.171326
TCGA-EW-A1J6-01A	-0.00482589	1.00632
TCGA-EW-A1OV-01A	-0.603771	1.68632
TCGA-EW-A1OW-01A	-3.15002	0.0999944
TCGA-EW-A1OX-01A	2.29746	1.41229
TCGA-EW-A1OY-01A	1.61609	-0.489776
TCGA-EW-A1OZ-01A	0.340088	0.730366
TCGA-EW-A1P0-01A	1.25403	-0.0593022
TCGA-EW-A1P1-01A	-2.08607	-0.415091
TCGA-EW-A1P3-01A	0.122022	-0.804988
TCGA-EW-A1P4-01A	-2.9975	-0.630461
TCGA-EW-A1P5-01A	0.732743	-0.998024
TCGA-EW-A1P6-01A	0.836896	-0.210263
TCGA-EW-A1P7-01A	-3.52303	-0.512734
TCGA-EW-A1P8-01A	-1.85896	1.0677
TCGA-EW-A1PA-01A	-0.380009	-0.513804
TCGA-EW-A1PB-01A	-1.66714	-0.221763
TCGA-EW-A1PC-01B	2.42963	-0.0394421
TCGA-EW-A1PD-01A	0.649005	-0.1926
TCGA-EW-A1PE-01A	1.47804	-1.22958
TCGA-EW-A1PF-01A	-0.448618	0.236391
TCGA-EW-A1PG-01A	-0.788452	-1.86478
TCGA-EW-A1PH-01A	-1.90583	0.850427
TCGA-EW-A2FR-01A	-0.50982	0.32269
TCGA-EW-A2FS-01A	-0.478317	-1.49925
TCGA-EW-A2FV-01A	-0.975182	-0.751646
TCGA-EW-A2FW-01A	0.709191	0.85278
TCGA-EW-A3E8-01B	-0.62041	-1.67926
TCGA-EW-A3U0-01A	-3.66453	0.235668
TCGA-EW-A423-01A	2.41735	-0.762698
TCGA-EW-A424-01A	-0.337855	-0.517189
TCGA-EW-A6S9-01A	-0.528441	0.615784
TCGA-EW-A6SA-01A	1.99884	1.46838
TCGA-EW-A6SB-01A	-3.76056	-0.242932
TCGA-EW-A6SC-01A	-0.212689	-0.485048
TCGA-EW-A6SD-01A	-0.135114	0.75156
TCGA-GI-A2C8-01A	1.10937	0.274296
TCGA-GI-A2C9-01A	-1.97226	0.681933
TCGA-GM-A2D9-01A	1.30448	-1.31032
TCGA-GM-A2DA-01A	0.299967	-1.74155
TCGA-GM-A2DB-01A	-1.03914	0.52435
TCGA-GM-A2DC-01A	-0.0636839	1.55701
TCGA-GM-A2DD-01A	-2.14992	0.576032
TCGA-GM-A2DF-01A	-3.60405	0.689235
TCGA-GM-A2DH-01A	0.782512	0.385474
TCGA-GM-A2DI-01A	-0.667556	-0.668047
TCGA-GM-A2DK-01A	-0.584629	-1.36311
TCGA-GM-A2DL-01A	0.746152	-0.249055
TCGA-GM-A2DM-01A	1.33129	1.10588
TCGA-GM-A2DN-01A	-1.25131	-1.67965
TCGA-GM-A2DO-01A	0.336672	0.789383
TCGA-GM-A3NW-01A	-0.14402	-0.956956
TCGA-GM-A3NY-01A	0.206179	-1.94567
TCGA-GM-A3XG-01A	-0.826549	-2.37824
TCGA-GM-A3XL-01A	-2.05323	-0.00206935
TCGA-GM-A3XN-01A	-0.414072	-1.34943
TCGA-GM-A4E0-01A	-1.37888	-1.33233
TCGA-GM-A5PV-01A	-0.0266776	-1.64444
TCGA-GM-A5PX-01A	-0.0691825	-0.166282
TCGA-HN-A2NL-01A	-2.22331	0.912957
TCGA-HN-A2OB-01A	-0.107542	-1.39084
TCGA-JL-A3YW-01A	-2.08906	1.22604
TCGA-JL-A3YX-01A	1.16108	-1.81098
TCGA-LD-A66U-01A	-0.472573	-1.33497
TCGA-LD-A74U-01A	-0.345306	-1.41523
TCGA-LD-A7W6-01A	0.415508	-1.84453
TCGA-LD-A9QF-01A	-1.19397	-0.746691
TCGA-LL-A440-01A	-0.930225	-1.04352
TCGA-LL-A441-01A	-2.31168	-0.049415
TCGA-LL-A442-01A	3.73727	0.317522
TCGA-LL-A50Y-01A	0.671672	-0.641209
TCGA-LL-A5YL-01A	-1.01399	-1.09829
TCGA-LL-A5YM-01A	-0.907655	-1.15512
TCGA-LL-A5YN-01A	0.180675	-1.62751
TCGA-LL-A5YO-01A	-1.82231	1.07962
TCGA-LL-A5YP-01A	-3.21525	1.02147
TCGA-LL-A6FP-01A	0.803754	0.183058
TCGA-LL-A6FQ-01A	1.43145	-0.362804
TCGA-LL-A6FR-01A	-2.81517	-0.0430088
TCGA-LL-A73Y-01A	-1.97835	0.909564
TCGA-LL-A73Z-01A	-1.86852	-0.757744
TCGA-LL-A740-01A	-1.56498	1.69649
TCGA-LL-A7SZ-01A	-1.39178	-0.255339
TCGA-LL-A7T0-01A	0.24331	-0.500657
TCGA-LL-A8F5-01A	-2.91096	0.686223
TCGA-LL-A9Q3-01A	1.00082	-0.310543
TCGA-LQ-A4E4-01A	1.63026	-0.824717
TCGA-MS-A51U-01A	0.622339	-2.33384
TCGA-OK-A5Q2-01A	-1.15614	-1.36054
TCGA-OL-A5D6-01A	-1.7822	0.0982198
TCGA-OL-A5D7-01A	-2.02061	1.23834
TCGA-OL-A5D8-01A	0.818332	0.510773
TCGA-OL-A5DA-01A	0.17985	-0.332462
TCGA-OL-A5RU-01A	-0.352148	-1.71254
TCGA-OL-A5RV-01A	0.0695864	-2.51943
TCGA-OL-A5RW-01A	-2.8465	0.0109059
TCGA-OL-A5RX-01A	-0.840721	-1.5765
TCGA-OL-A5RY-01A	-2.54182	-1.4644
TCGA-OL-A5RZ-01A	-0.403769	-0.291922
TCGA-OL-A5S0-01A	-3.83979	-0.339765
TCGA-OL-A66H-01A	-0.517723	0.582305
TCGA-OL-A66I-01A	-2.52397	0.81866
TCGA-OL-A66J-01A	-0.54514	-1.76832
TCGA-OL-A66K-01A	0.538415	-0.230802
TCGA-OL-A66L-01A	-0.908681	-2.64272
TCGA-OL-A66N-01A	-1.61993	0.0991445
TCGA-OL-A66O-01A	0.00931056	0.186731
TCGA-OL-A66P-01A	-2.68284	0.243666
TCGA-OL-A6VO-01A	-2.09222	1.50584
TCGA-OL-A6VQ-01A	-0.115564	-1.73823
TCGA-OL-A6VR-01A	-0.406342	-0.793865
TCGA-OL-A97C-01A	0.103241	0.120565
TCGA-PE-A5DC-01A	0.350054	-0.735913
TCGA-PE-A5DD-01A	1.21582	-0.95118
TCGA-PE-A5DE-01A	-0.533941	-1.20065
TCGA-PL-A8LV-01A	-3.71301	0.142085
TCGA-PL-A8LX-01A	-0.516029	3.08146
TCGA-PL-A8LY-01A	-1.06149	-1.69059
TCGA-PL-A8LZ-01A	-1.81607	1.15692
TCGA-S3-A6ZF-01A	0.69056	-0.479755
TCGA-S3-A6ZG-01A	1.41976	-0.0843478
TCGA-S3-A6ZH-01A	0.370337	0.676663
TCGA-S3-AA0Z-01A	-1.69149	0.489054
TCGA-S3-AA10-01A	-3.55647	0.310832
TCGA-S3-AA11-01A	0.606871	-1.11837
TCGA-S3-AA12-01A	1.4958	1.69779
TCGA-S3-AA14-01A	0.0803109	0.11494
TCGA-S3-AA15-01A	-4.14107	-0.321562
TCGA-S3-AA17-01A	0.236416	0.918438
TCGA-UL-AAZ6-01A	-0.817785	0.793458
TCGA-UU-A93S-01A	-0.53851	0.975251
TCGA-V7-A7HQ-01A	-0.556358	-0.774944
TCGA-W8-A86G-01A	-0.583987	-1.90653
TCGA-WT-AB41-01A	-1.70377	-0.569203
TCGA-WT-AB44-01A	0.0732295	-0.934453
TCGA-XX-A899-01A	-0.687341	-0.700804
TCGA-XX-A89A-01A	-1.4376	-0.387142
TCGA-Z7-A8R5-01A	-1.63184	-2.51071
TCGA-Z7-A8R6-01A	2.02335	-1.35551
