# Supplementary material for: Bioinformatic analysis and experimental validation of six cuproptosis-associated genes as a prognostic signature of breast cancer
Source: PeerJ journal article supplement (doi:10.7717/peerj.17419), 2024-06-18
Supplement: Supplementary_Table_4.xlsx [file Supplementary_Table_4.xlsx]

## Sheet: Sheet1
Supplementary Table 4 The GSVA result between high- and low-Cusig score groups based on KEGG and hallmark gene set
KEGG
	logFC	AveExpr	t	P.Value	adj.P.Val	B
KEGG_MISMATCH_REPAIR	0.284379	0.00365417	9.94477	2.37867e-22	2.6845e-21	39.8336
KEGG_GLYCOLYSIS_GLUCONEOGENESIS	0.231335	0.0288505	9.4301	2.44439e-20	1.83911e-19	35.2677
KEGG_PENTOSE_AND_GLUCURONATE_INTERCONVERSIONS	0.202784	-0.0237546	7.50833	1.25626e-13	4.41087e-13	20.0841
KEGG_PROTEIN_EXPORT	0.198608	-0.0108687	9.58444	6.22361e-21	5.7843e-20	36.6156
KEGG_OOCYTE_MEIOSIS	0.181524	0.0115528	7.42359	2.31635e-13	7.46906e-13	19.485
KEGG_VIRAL_MYOCARDITIS	0.17473	-0.00271046	6.23499	6.48492e-10	1.79757e-09	11.7385
KEGG_CITRATE_CYCLE_TCA_CYCLE	0.17318	-0.0351528	6.5892	6.91677e-11	2.10163e-10	13.9173
KEGG_SYSTEMIC_LUPUS_ERYTHEMATOSUS	0.171515	0.0570262	7.71831	2.68795e-14	1.06174e-13	21.5947
KEGG_HOMOLOGOUS_RECOMBINATION	0.166627	0.00479173	7.48201	1.52021e-13	5.2216e-13	19.8973
KEGG_GLUTATHIONE_METABOLISM	0.164091	-0.0132521	7.47667	1.58e-13	5.3115e-13	19.8595
KEGG_FRUCTOSE_AND_MANNOSE_METABOLISM	0.162402	-0.0178475	7.67073	3.82437e-14	1.43869e-13	21.2492
KEGG_TERPENOID_BACKBONE_BIOSYNTHESIS	0.1622	-0.0148403	7.62154	5.4955e-14	2.01928e-13	20.8939
KEGG_STEROID_BIOSYNTHESIS	0.160571	-0.0137708	7.81036	1.35153e-14	5.77139e-14	22.2687
KEGG_UBIQUITIN_MEDIATED_PROTEOLYSIS	0.158801	-0.0159904	12.9252	1.26906e-35	1.00255e-33	70.036
KEGG_GLYCOSYLPHOSPHATIDYLINOSITOL_GPI_ANCHOR_BIOSYNTHESIS	0.157114	-0.0156809	8.58063	3.26385e-17	1.98342e-16	28.1852
KEGG_INOSITOL_PHOSPHATE_METABOLISM	0.15629	0.0212438	5.92723	4.14767e-09	1.07431e-08	9.93632
KEGG_RNA_DEGRADATION	0.151978	-0.0149231	9.92148	2.94614e-22	3.10326e-21	39.6226
KEGG_CELL_CYCLE	0.145695	-0.0202435	7.93384	5.31452e-15	2.54453e-14	23.1841
KEGG_VALINE_LEUCINE_AND_ISOLEUCINE_DEGRADATION	0.145225	-0.0598089	6.08268	1.64158e-09	4.39611e-09	10.8359
KEGG_AMINOACYL_TRNA_BIOSYNTHESIS	0.144114	-0.0154939	8.09209	1.57765e-15	8.04094e-15	24.3758
KEGG_PROTEASOME	0.137562	0.0184833	5.54794	3.64012e-08	8.58416e-08	7.83302
KEGG_VASOPRESSIN_REGULATED_WATER_REABSORPTION	0.128611	-0.000725064	7.79232	1.5473e-14	6.43349e-14	22.1361
KEGG_PROPANOATE_METABOLISM	0.128433	-0.0593369	3.43854	0.000607309	0.000989224	-1.4255
KEGG_BASAL_TRANSCRIPTION_FACTORS	0.127404	-0.00346576	9.4738	1.66244e-20	1.38245e-19	35.6475
KEGG_BIOSYNTHESIS_OF_UNSATURATED_FATTY_ACIDS	0.113317	-0.0291296	5.66715	1.86462e-08	4.46379e-08	8.48001
KEGG_NUCLEOTIDE_EXCISION_REPAIR	0.110944	-0.0189191	6.38007	2.62726e-10	7.83222e-10	12.6175
KEGG_N_GLYCAN_BIOSYNTHESIS	0.110729	-0.00916335	8.07143	1.85083e-15	9.13845e-15	24.2191
KEGG_PYRIMIDINE_METABOLISM	0.110658	-0.0321531	6.20841	7.63747e-10	2.08055e-09	11.5794
KEGG_PEROXISOME	0.110385	-0.0181981	6.35143	3.14495e-10	9.03457e-10	12.4424
KEGG_DNA_REPLICATION	0.107587	-0.0139762	4.09623	4.51519e-05	8.59518e-05	1.01048
KEGG_NON_HOMOLOGOUS_END_JOINING	0.106204	-0.00643108	5.08253	4.39146e-07	9.6368e-07	5.43205
KEGG_PHENYLALANINE_METABOLISM	0.103174	0.00137868	3.23432	0.00125654	0.00196567	-2.09735
KEGG_SELENOAMINO_ACID_METABOLISM	0.101321	0.0370457	4.0526	5.43054e-05	0.000100944	0.836081
KEGG_TYPE_II_DIABETES_MELLITUS	0.100203	0.0710084	2.70693	0.00689874	0.00947827	-3.64535
KEGG_TRYPTOPHAN_METABOLISM	-0.106414	0.0229661	-5.84065	6.8866e-09	1.75497e-08	9.4447
KEGG_GLYCOSPHINGOLIPID_BIOSYNTHESIS_GLOBO_SERIES	-0.111485	-0.010455	-4.31037	1.77962e-05	3.47135e-05	1.89264
KEGG_AXON_GUIDANCE	-0.112127	-0.0100005	-9.03312	7.577e-19	5.20507e-18	31.8865
KEGG_PRIMARY_IMMUNODEFICIENCY	-0.116156	0.00708276	-5.06675	4.76214e-07	1.03071e-06	5.35414
KEGG_ACUTE_MYELOID_LEUKEMIA	-0.123271	0.0354489	-3.3612	0.000803405	0.00128319	-1.68469
KEGG_RIBOSOME	-0.12356	-0.0415677	-4.05723	5.32564e-05	0.000100173	0.854501
KEGG_ECM_RECEPTOR_INTERACTION	-0.129953	-0.0147959	-7.45801	1.80792e-13	5.95107e-13	19.7276
KEGG_GLYCOSAMINOGLYCAN_BIOSYNTHESIS_KERATAN_SULFATE	-0.134363	0.00222395	-5.46331	5.80789e-08	1.34948e-07	7.38163
KEGG_PPAR_SIGNALING_PATHWAY	-0.134905	-0.0145487	-8.45689	8.87657e-17	5.19443e-16	27.2019
KEGG_PRION_DISEASES	-0.135766	-0.0582337	-5.26707	1.67436e-07	3.72605e-07	6.36019
KEGG_P53_SIGNALING_PATHWAY	-0.135799	-0.0337768	-11.1712	1.73238e-27	3.04129e-26	51.5112
KEGG_CHEMOKINE_SIGNALING_PATHWAY	-0.137885	0.00181988	-8.12473	1.2249e-15	6.45115e-15	24.6242
KEGG_NOD_LIKE_RECEPTOR_SIGNALING_PATHWAY	-0.145601	-0.0135186	-7.56371	8.39502e-14	3.01457e-13	20.4788
KEGG_ERBB_SIGNALING_PATHWAY	-0.146393	-0.0218357	-7.00268	4.42201e-12	1.39735e-11	16.6008
KEGG_JAK_STAT_SIGNALING_PATHWAY	-0.151164	-0.0419542	-8.39478	1.45999e-16	8.23854e-16	26.713
KEGG_GNRH_SIGNALING_PATHWAY	-0.154907	-0.00480546	-5.66784	1.85732e-08	4.46379e-08	8.48381
KEGG_CELL_ADHESION_MOLECULES_CAMS	-0.155899	-0.00808836	-9.78321	1.0406e-21	1.0276e-20	38.3784
KEGG_NOTCH_SIGNALING_PATHWAY	-0.156274	-0.0356719	-12.3143	1.08871e-32	5.73388e-31	63.3526
KEGG_CYTOSOLIC_DNA_SENSING_PATHWAY	-0.156861	0.0144073	-6.29906	4.36116e-10	1.23047e-09	12.1243
KEGG_ARACHIDONIC_ACID_METABOLISM	-0.160084	-0.0223118	-9.45068	2.03889e-20	1.61072e-19	35.4464
KEGG_ALDOSTERONE_REGULATED_SODIUM_REABSORPTION	-0.166771	-0.0373671	-7.78319	1.65682e-14	6.71224e-14	22.0691
KEGG_TGF_BETA_SIGNALING_PATHWAY	-0.167824	-0.0260847	-9.52356	1.06996e-20	9.39186e-20	36.0817
KEGG_COMPLEMENT_AND_COAGULATION_CASCADES	-0.172042	0.00622271	-12.0657	1.5879e-31	5.01775e-30	60.7018
KEGG_GLYCOSAMINOGLYCAN_BIOSYNTHESIS_CHONDROITIN_SULFATE	-0.182226	-0.00681589	-7.86655	8.85189e-15	3.88499e-14	22.6837
KEGG_NATURAL_KILLER_CELL_MEDIATED_CYTOTOXICITY	-0.183533	-0.011883	-8.13769	1.10756e-15	6.03431e-15	24.723
KEGG_GLYCOSPHINGOLIPID_BIOSYNTHESIS_LACTO_AND_NEOLACTO_SERIES	-0.188394	-0.0249278	-8.82515	4.35879e-18	2.86954e-17	30.165
KEGG_CYTOKINE_CYTOKINE_RECEPTOR_INTERACTION	-0.199481	-0.00446756	-11.2176	1.08376e-27	2.14042e-26	51.9746
KEGG_DRUG_METABOLISM_CYTOCHROME_P450	-0.202027	-0.0530134	-9.14075	3.02289e-19	2.17098e-18	32.791
KEGG_VEGF_SIGNALING_PATHWAY	-0.211479	0.0353112	-5.78057	9.75247e-09	2.40764e-08	9.10754
KEGG_ONE_CARBON_POOL_BY_FOLATE	-0.21279	0.00630237	-7.91289	6.2318e-15	2.89595e-14	23.0279
KEGG_B_CELL_RECEPTOR_SIGNALING_PATHWAY	-0.217543	-0.0141803	-7.70873	2.886e-14	1.11216e-13	21.5251
KEGG_FOCAL_ADHESION	-0.241905	-0.0644716	-10.8568	3.98519e-26	5.72418e-25	48.4138
KEGG_VASCULAR_SMOOTH_MUSCLE_CONTRACTION	-0.259607	-0.0389662	-14.7342	6.9099e-45	1.09176e-42	91.1614
KEGG_HEMATOPOIETIC_CELL_LINEAGE	-0.26048	0.0286219	-10.7041	1.78243e-25	2.34687e-24	46.9346
KEGG_PRIMARY_BILE_ACID_BIOSYNTHESIS	-0.283197	-0.0403495	-12.1784	4.73362e-32	1.86978e-30	61.8988
KEGG_EPITHELIAL_CELL_SIGNALING_IN_HELICOBACTER_PYLORI_INFECTION	-0.335414	-0.0777357	-11.2688	6.45268e-28	1.45646e-26	52.4869
KEGG_LONG_TERM_POTENTIATION	-0.337243	-0.0837617	-10.0351	1.03359e-22	1.25621e-21	40.6556
KEGG_INTESTINAL_IMMUNE_NETWORK_FOR_IGA_PRODUCTION	-0.368778	-0.0542781	-11.1043	3.3939e-27	5.36237e-26	50.8468
KEGG_MELANOGENESIS	-0.372372	-0.0632153	-11.8348	1.84309e-30	4.85348e-29	58.2774
Hallmark
	logFC	AveExpr	t	P.Value	adj.P.Val	B
HALLMARK_E2F_TARGETS	0.238401	0.0199773	10.3179	7.29791e-24	4.5612e-23	42.9498
HALLMARK_G2M_CHECKPOINT	0.191404	-0.00318985	10.6676	2.54217e-25	2.11848e-24	46.2738
HALLMARK_PROTEIN_SECRETION	0.177844	-0.0150463	10.5095	1.17292e-24	8.37797e-24	44.7596
HALLMARK_UNFOLDED_PROTEIN_RESPONSE	0.143133	0.001561	11.7157	6.42782e-30	8.03477e-29	56.7652
HALLMARK_MTORC1_SIGNALING	0.142001	-0.000850853	7.64932	4.47777e-14	1.01768e-13	20.7063
HALLMARK_MYC_TARGETS_V1	0.114203	-0.00146636	5.50968	4.49925e-08	7.49875e-08	7.20015
HALLMARK_DNA_REPAIR	0.103659	-0.00417144	7.36905	3.4225e-13	7.44022e-13	18.7086
HALLMARK_IL2_STAT5_SIGNALING	-0.104235	-0.0128827	-8.12531	1.21894e-15	3.20775e-15	24.2512
HALLMARK_COAGULATION	-0.104519	0.0226407	-8.47947	7.39896e-17	2.31217e-16	27.0114
HALLMARK_HEDGEHOG_SIGNALING	-0.107328	-0.00886082	-6.41552	2.10063e-10	4.03967e-10	12.4224
HALLMARK_WNT_BETA_CATENIN_SIGNALING	-0.113416	-0.0175417	-7.92172	5.82591e-15	1.45648e-14	22.7116
HALLMARK_APICAL_SURFACE	-0.119412	0.0034529	-10.2693	1.15544e-23	6.4191e-23	42.495
HALLMARK_KRAS_SIGNALING_UP	-0.123131	-0.0226596	-9.43634	2.31227e-20	9.63447e-20	34.9772
HALLMARK_INFLAMMATORY_RESPONSE	-0.139085	-0.00431834	-7.75931	1.97993e-14	4.71411e-14	21.5085
HALLMARK_NOTCH_SIGNALING	-0.141155	-0.027185	-8.94658	1.5749e-18	5.62465e-18	30.8086
HALLMARK_EPITHELIAL_MESENCHYMAL_TRANSITION	-0.147626	0.0014984	-6.48672	1.33633e-10	2.67267e-10	12.8641
HALLMARK_ANGIOGENESIS	-0.170354	-0.0378291	-8.24866	4.6473e-16	1.36685e-15	25.2008
HALLMARK_ALLOGRAFT_REJECTION	-0.175089	-0.0081503	-8.18472	7.67274e-16	2.13132e-15	24.707
HALLMARK_APICAL_JUNCTION	-0.187983	-0.0206242	-15.8863	3.34983e-51	1.67492e-49	105.457
HALLMARK_MYOGENESIS	-0.19329	-0.0294423	-13.6501	3.0964e-39	5.16066e-38	78.0634
HALLMARK_IL6_JAK_STAT3_SIGNALING	-0.20297	-0.00776889	-11.0891	3.94887e-27	3.94887e-26	50.3998
HALLMARK_TNFA_SIGNALING_VIA_NFKB	-0.23184	-0.0445991	-14.5209	9.39147e-44	2.34787e-42	88.4026
