# Supplementary material for: Bioinformatic analysis and experimental validation of six cuproptosis-associated genes as a prognostic signature of breast cancer
Source: PeerJ journal article supplement (doi:10.7717/peerj.17419), 2024-06-18
Supplement: Supplementary_Table_5.xlsx [file Supplementary_Table_5.xlsx]

## Sheet: Sheet1
Supplementary Table 5 The GO functional enrichment result of DEGs between high- and low-Cusig score groups
ONTOLOGY	ID	Description	GeneRatio	BgRatio	pvalue	p.adjust	qvalue	geneID	Count
BP	GO:0006959	humoral immune response	50/554	317/18722	1.84346e-22	1.1105e-18	7.68432e-19	IGHA2/C7/IGHA1/C1R/CXCL2/CFI/MFAP4/JCHAIN/C3/KLK5/A2M/IL6/SERPING1/SLPI/C1S/CTSG/KLK7/LTF/DEFB1/IGHD/SPNS2/IGKC/IGLC2/IGLC3/TRBC2/TF/PI3/SPON2/CFD/IGHM/CXCL1/GPR183/IGLL5/CCR7/RARRES2/IGHG2/CCL2/IGLC7/C1QA/KRT6A/CFB/WFDC2/IGHG1/IGHG3/S100A9/CXCL14/CXCL9/IGHG4/CXCL13/S100A7	50
BP	GO:0030198	extracellular matrix organization	48/554	301/18722	8.2545e-22	1.9179e-18	1.32713e-18	COL17A1/LAMB3/CAV2/MYH11/FBLN5/CAV1/MMP7/SERPINF2/MFAP4/SERPINB5/GAS6/TNXB/KLK5/PAPLN/ADAMTS1/CCN1/TNFRSF1B/IL6/CTSG/COL16A1/KLK7/FBLN2/ELN/MIA/PTX3/COL14A1/COL18A1/SPOCK2/DPT/CCN2/ETS1/MMP3/FOXC1/LOXL4/FSCN1/EMILIN1/FBLN1/CCDC80/COL9A2/CRISPLD2/MMP2/SFRP2/FMOD/COL11A1/CYP1B1/TPSAB1/NTN4/NPNT	48
BP	GO:0043062	extracellular structure organization	48/554	302/18722	9.55129e-22	1.9179e-18	1.32713e-18	COL17A1/LAMB3/CAV2/MYH11/FBLN5/CAV1/MMP7/SERPINF2/MFAP4/SERPINB5/GAS6/TNXB/KLK5/PAPLN/ADAMTS1/CCN1/TNFRSF1B/IL6/CTSG/COL16A1/KLK7/FBLN2/ELN/MIA/PTX3/COL14A1/COL18A1/SPOCK2/DPT/CCN2/ETS1/MMP3/FOXC1/LOXL4/FSCN1/EMILIN1/FBLN1/CCDC80/COL9A2/CRISPLD2/MMP2/SFRP2/FMOD/COL11A1/CYP1B1/TPSAB1/NTN4/NPNT	48
BP	GO:0045229	external encapsulating structure organization	48/554	304/18722	1.27642e-21	1.92229e-18	1.33016e-18	COL17A1/LAMB3/CAV2/MYH11/FBLN5/CAV1/MMP7/SERPINF2/MFAP4/SERPINB5/GAS6/TNXB/KLK5/PAPLN/ADAMTS1/CCN1/TNFRSF1B/IL6/CTSG/COL16A1/KLK7/FBLN2/ELN/MIA/PTX3/COL14A1/COL18A1/SPOCK2/DPT/CCN2/ETS1/MMP3/FOXC1/LOXL4/FSCN1/EMILIN1/FBLN1/CCDC80/COL9A2/CRISPLD2/MMP2/SFRP2/FMOD/COL11A1/CYP1B1/TPSAB1/NTN4/NPNT	48
BP	GO:0050900	leukocyte migration	50/554	369/18722	1.63405e-19	1.9687e-16	1.36228e-16	SAA1/CCL14/IL34/CCL21/CX3CL1/SELP/CCL19/CXCL2/PTN/LEP/GAS6/S1PR1/ANXA1/CH25H/EDN1/JAM2/IL27RA/IL6/CCN3/EDN3/KIT/SPNS2/PECAM1/CCL28/RAC2/CORO1A/LGALS3/CCL17/CCL5/APOD/CXCL1/LCK/EMILIN1/GPR183/CCL22/CCR7/DUSP1/ICAM1/RARRES2/CXCL12/CCL2/CD74/SELL/THBS4/PYCARD/S100A9/S100A8/CXCL9/CXCL13/S100A7	50
BP	GO:0060326	cell chemotaxis	45/554	310/18722	7.52494e-19	7.55504e-16	5.22786e-16	SAA1/CCL14/IL34/CCL21/CX3CL1/CCL19/CXCL2/PTN/GAS6/S1PR1/ANXA1/CH25H/EDN1/FGF2/IL6/EPHA2/CCN3/MET/GSTP1/EDN3/KIT/CCL28/RAC2/CORO1A/LGALS3/CCL17/CCL5/NR4A1/CXCL1/GPR183/CCL22/CCR7/EGR3/DUSP1/RARRES2/CXCL12/CCL2/CD74/THBS4/S100A9/CXCL14/S100A8/CXCL9/CXCL13/S100A7	45
BP	GO:0030595	leukocyte chemotaxis	37/554	230/18722	3.41615e-17	2.93984e-14	2.03428e-14	SAA1/CCL14/IL34/CCL21/CX3CL1/CCL19/CXCL2/PTN/GAS6/S1PR1/ANXA1/CH25H/EDN1/IL6/CCN3/EDN3/KIT/RAC2/CORO1A/LGALS3/CCL17/CCL5/CXCL1/GPR183/CCL22/CCR7/DUSP1/RARRES2/CXCL12/CCL2/CD74/THBS4/S100A9/S100A8/CXCL9/CXCL13/S100A7	37
BP	GO:0042742	defense response to bacterium	45/554	350/18722	8.87749e-17	6.68475e-14	4.62564e-14	IGHA2/SELP/IGHA1/AQP1/JCHAIN/KLK5/IL27RA/IL6/EPHA2/SLPI/CTSG/KLK7/ANXA3/LTF/DEFB1/IGHD/IGKC/IGLC2/IGLC3/TRBC2/CYBA/TF/CD36/IL7R/PI3/LCN2/SPON2/IGHM/GBP2/IGLL5/CEBPB/PLA2G2A/RARRES2/IGHG2/IGLC7/KRT6A/PYCARD/WFDC2/IGHG1/IGHG3/S100A9/S100A8/IGHG4/CXCL13/S100A7	45
BP	GO:0045785	positive regulation of cell adhesion	50/554	437/18722	2.12529e-16	1.42253e-13	9.84346e-14	SAA1/SFRP1/VSIR/LIMS2/CCL21/CX3CL1/SELP/CCL19/CAV1/PTN/LEP/SERPINF2/ANXA1/IL27RA/CCN1/LIF/IL6/COL16A1/IL4R/FBLN2/RUNX3/CCL28/SPOCK2/CORO1A/TGFBR2/CD36/IL7R/ETS1/NEDD9/CD27/CD3E/CCL5/SOCS1/LCK/EMILIN1/CCR7/EGR3/VTCN1/OLFM4/ICAM1/CXCL12/CCDC80/CCL2/CD74/PYCARD/SFRP2/IGF2/FOXA1/NPNT/CXCL13	50
BP	GO:0070371	ERK1 and ERK2 cascade	43/554	330/18722	2.69473e-16	1.62331e-13	1.12328e-13	CCL14/CCL21/CX3CL1/CCL19/SERPINF2/ADIPOQ/GAS6/CHI3L1/SPRY2/NDRG2/ZFP36L2/CCN1/FGF2/LIF/EPHA2/GSTP1/CAVIN3/SPRY1/KLF4/CCN2/EGFR/GLIPR2/TF/CCL17/CD36/CCL5/OXTR/ATF3/EMILIN1/GPR183/CCL22/CCR7/DUSP1/PLA2G2A/ICAM1/FBLN1/CCL2/CD74/RAMP3/APOE/PYCARD/NPNT/S100A7	43
BP	GO:0071621	granulocyte chemotaxis	26/554	125/18722	3.25041e-15	1.78004e-12	1.23173e-12	SAA1/CCL14/IL34/CCL21/CX3CL1/CCL19/CXCL2/ANXA1/EDN1/EDN3/RAC2/LGALS3/CCL17/CCL5/CXCL1/CCL22/CCR7/RARRES2/CCL2/CD74/THBS4/S100A9/S100A8/CXCL9/CXCL13/S100A7	26
BP	GO:0070372	regulation of ERK1 and ERK2 cascade	40/554	309/18722	3.84697e-15	1.93118e-12	1.33631e-12	CCL14/CCL21/CX3CL1/CCL19/SERPINF2/ADIPOQ/GAS6/CHI3L1/SPRY2/NDRG2/CCN1/FGF2/LIF/EPHA2/GSTP1/CAVIN3/SPRY1/KLF4/CCN2/EGFR/GLIPR2/CCL17/CD36/CCL5/ATF3/EMILIN1/GPR183/CCL22/CCR7/DUSP1/PLA2G2A/ICAM1/FBLN1/CCL2/CD74/RAMP3/APOE/PYCARD/NPNT/S100A7	40
BP	GO:0034612	response to tumor necrosis factor	36/554	253/18722	4.92391e-15	2.28167e-12	1.57884e-12	SFRP1/CCL14/GPD1/CCL21/CX3CL1/CCL19/FABP4/ADIPOQ/GAS6/CHI3L1/ZFP36L2/GGT5/EDN1/TNFRSF1B/ZFP36/GSTP1/KLF2/YBX3/CCDC3/CYBA/CCL17/LCN2/CCL5/TNFAIP3/SPHK1/CCL22/GBP2/ICAM1/BIRC3/ASS1/CCL2/CLDN1/PYCARD/UBD/NPNT/PYDC1	36
BP	GO:0071356	cellular response to tumor necrosis factor	34/554	229/18722	7.9613e-15	3.42563e-12	2.37043e-12	SFRP1/CCL14/GPD1/CCL21/CX3CL1/CCL19/FABP4/ADIPOQ/GAS6/CHI3L1/ZFP36L2/EDN1/TNFRSF1B/ZFP36/GSTP1/KLF2/YBX3/CCDC3/CYBA/CCL17/LCN2/CCL5/TNFAIP3/SPHK1/CCL22/GBP2/ICAM1/BIRC3/ASS1/CCL2/CLDN1/PYCARD/NPNT/PYDC1	34
BP	GO:0097529	myeloid leukocyte migration	33/554	220/18722	1.47463e-14	5.9221e-12	4.09791e-12	SAA1/CCL14/IL34/CCL21/CX3CL1/CCL19/CXCL2/ANXA1/EDN1/IL6/CCN3/EDN3/KIT/PECAM1/RAC2/LGALS3/CCL17/CCL5/CXCL1/EMILIN1/CCL22/CCR7/DUSP1/RARRES2/CXCL12/CCL2/CD74/THBS4/S100A9/S100A8/CXCL9/CXCL13/S100A7	33
BP	GO:0071674	mononuclear cell migration	31/554	196/18722	2.13296e-14	8.03061e-12	5.55693e-12	SAA1/CCL14/IL34/CCL21/CX3CL1/CCL19/GAS6/S1PR1/ANXA1/CH25H/JAM2/IL27RA/IL6/CCN3/SPNS2/PECAM1/LGALS3/CCL17/CCL5/APOD/GPR183/CCL22/CCR7/DUSP1/ICAM1/RARRES2/CXCL12/CCL2/PYCARD/CXCL13/S100A7	31
BP	GO:0097530	granulocyte migration	27/554	148/18722	2.90305e-14	1.02871e-11	7.11832e-12	SAA1/CCL14/IL34/CCL21/CX3CL1/CCL19/CXCL2/ANXA1/EDN1/EDN3/PECAM1/RAC2/LGALS3/CCL17/CCL5/CXCL1/CCL22/CCR7/RARRES2/CCL2/CD74/THBS4/S100A9/S100A8/CXCL9/CXCL13/S100A7	27
BP	GO:0006956	complement activation	25/554	130/18722	7.49935e-14	2.50978e-11	1.73669e-11	IGHA2/C7/IGHA1/C1R/CFI/MFAP4/C3/A2M/SERPING1/C1S/IGHD/IGKC/IGLC2/IGLC3/TRBC2/CFD/IGHM/IGLL5/IGHG2/IGLC7/C1QA/CFB/IGHG1/IGHG3/IGHG4	25
BP	GO:0050867	positive regulation of cell activation	45/554	420/18722	7.97699e-14	2.52912e-11	1.75008e-11	IL33/IGHA2/VSIR/CCL21/SELP/CCL19/IGHA1/CAV1/LEP/GAS6/ANXA1/IL27RA/IL6/IL4R/IGHD/RUNX3/IGKC/IGLC2/IGLC3/TRBC2/CORO1A/CCN2/TGFBR2/IL7R/CD27/CD3E/CCL5/SOCS1/IGHM/LCK/GPR183/IGLL5/CCR7/EGR3/VTCN1/CD2/IGHG2/CCL2/CD74/IGLC7/PYCARD/IGF2/IGHG1/IGHG3/IGHG4	45
BP	GO:0002685	regulation of leukocyte migration	31/554	210/18722	1.4677e-13	4.4207e-11	3.05899e-11	IL34/CCL21/CX3CL1/SELP/CCL19/PTN/GAS6/ANXA1/EDN1/JAM2/IL27RA/IL6/CCN3/EDN3/CCL28/RAC2/LGALS3/CCL5/APOD/EMILIN1/CCR7/DUSP1/ICAM1/RARRES2/CXCL12/CCL2/CD74/THBS4/PYCARD/CXCL13/S100A7	31
BP	GO:0051251	positive regulation of lymphocyte activation	41/554	362/18722	1.69124e-13	4.85145e-11	3.35705e-11	IGHA2/VSIR/CCL21/CCL19/IGHA1/CAV1/LEP/GAS6/ANXA1/IL27RA/IL6/IL4R/IGHD/RUNX3/IGKC/IGLC2/IGLC3/TRBC2/CORO1A/TGFBR2/IL7R/CD27/CD3E/CCL5/SOCS1/IGHM/LCK/GPR183/IGLL5/CCR7/EGR3/VTCN1/IGHG2/CCL2/CD74/IGLC7/PYCARD/IGF2/IGHG1/IGHG3/IGHG4	41
BP	GO:0030593	neutrophil chemotaxis	22/554	103/18722	2.50499e-13	6.85911e-11	4.74629e-11	SAA1/CCL14/CCL21/CX3CL1/CCL19/CXCL2/EDN1/EDN3/RAC2/LGALS3/CCL17/CCL5/CXCL1/CCL22/CCR7/CCL2/CD74/THBS4/S100A9/S100A8/CXCL9/CXCL13	22
BP	GO:0007159	leukocyte cell-cell adhesion	41/554	371/18722	3.83632e-13	1.00478e-10	6.95279e-11	VSIR/CCL21/SELP/CCL19/CAV1/LEP/ANXA1/JAM2/IL27RA/IL6/IL4R/PECAM1/RUNX3/CCL28/KLF4/RAC2/CORO1A/LGALS3/PRNP/TGFBR2/IL7R/ETS1/CD27/CD3E/CCL5/SOCS1/LCK/CCR7/EGR3/VTCN1/CEBPB/ICAM1/CXCL12/ASS1/CCL2/CD74/SELL/PYCARD/IGF2/S100A9/S100A8	41
BP	GO:0048545	response to steroid hormone	39/554	339/18722	4.08685e-13	1.0258e-10	7.09822e-11	SFRP1/TP63/S100B/CAV1/PTN/AQP1/ADIPOQ/PLPP1/ZFP36L2/ANXA1/EDN1/ALPL/FAM107A/ZFP36/IL6/GSTP1/ANXA3/CDO1/PER1/AKR1C3/FOSB/CCN2/EGFR/TGFBR2/CYBA/FOS/OXTR/TXNIP/DUSP1/ICAM1/FBXO32/ASS1/CLDN1/MAOB/TAT/FOXA1/AREG/SCGB2A2/ESR1	39
BP	GO:0006909	phagocytosis	37/554	308/18722	4.42466e-13	1.06617e-10	7.37753e-11	GSN/IGHA2/IGHA1/LEP/ADIPOQ/GAS6/C3/ANXA1/CNN2/MET/ANXA3/RAB7B/MFGE8/PTX3/SRPX/IGHD/PECAM1/IGKC/IGLC2/IGLC3/RAC2/TRBC2/CORO1A/CYBA/CD36/SPON2/IGHM/SPHK1/IGLL5/IL2RG/IGHG2/CCL2/IGLC7/PYCARD/IGHG1/IGHG3/IGHG4	37
BP	GO:0072676	lymphocyte migration	23/554	117/18722	4.62394e-13	1.07133e-10	7.41328e-11	SAA1/CCL14/CCL21/CX3CL1/CCL19/GAS6/S1PR1/CH25H/JAM2/IL27RA/SPNS2/CCL17/CCL5/APOD/GPR183/CCL22/CCR7/ICAM1/CXCL12/CCL2/PYCARD/CXCL13/S100A7	23
BP	GO:0002696	positive regulation of leukocyte activation	43/554	409/18722	5.58678e-13	1.24647e-10	8.62521e-11	IL33/IGHA2/VSIR/CCL21/CCL19/IGHA1/CAV1/LEP/GAS6/ANXA1/IL27RA/IL6/IL4R/IGHD/RUNX3/IGKC/IGLC2/IGLC3/TRBC2/CORO1A/TGFBR2/IL7R/CD27/CD3E/CCL5/SOCS1/IGHM/LCK/GPR183/IGLL5/CCR7/EGR3/VTCN1/CD2/IGHG2/CCL2/CD74/IGLC7/PYCARD/IGF2/IGHG1/IGHG3/IGHG4	43
BP	GO:0031960	response to corticosteroid	27/554	167/18722	6.07739e-13	1.30751e-10	9.04754e-11	S100B/AQP1/ADIPOQ/ZFP36L2/ANXA1/EDN1/ALPL/FAM107A/ZFP36/IL6/GSTP1/ANXA3/CDO1/AKR1C3/FOSB/CCN2/EGFR/CYBA/FOS/DUSP1/ICAM1/FBXO32/ASS1/CLDN1/MAOB/TAT/AREG	27
BP	GO:0051346	negative regulation of hydrolase activity	41/554	379/18722	7.76598e-13	1.61318e-10	1.11627e-10	ITIH5/CRYAB/PROS1/AQP1/SERPINF2/SERPINB5/GAS6/C3/SPRY2/ANXA1/PAPLN/A2M/SERPING1/SLPI/PI16/PPP1R15A/LTF/PTX3/SPRY1/ANGPTL4/RGS2/SPOCK2/KLF4/IFI16/TIMP4/LGALS3/PRNP/RARRES1/PI3/CD27/NR4A1/CST7/OPRPN/GZMA/BIRC3/SFN/LAMP3/SFRP2/WFDC2/TFPI2/PPP1R1B	41
BP	GO:0031589	cell-substrate adhesion	40/554	363/18722	8.24234e-13	1.65506e-10	1.14525e-10	COL17A1/LAMB3/SFRP1/LIMS2/FAT2/CCL21/CX3CL1/ITGA7/FBLN5/PTN/ID1/GAS6/TNXB/ITGB4/CCN1/FAM107A/COL16A1/FBLN2/SORBS1/VWF/CCL28/SPOCK2/TNN/RAC2/CORO1A/CCN2/TACSTD2/CD36/NEDD9/CD3E/FZD7/APOD/EMILIN1/CCR7/OLFM4/FBLN1/CCDC80/NTN4/NPNT/MSLN	40
BP	GO:0019730	antimicrobial humoral response	23/554	122/18722	1.16747e-12	2.19776e-10	1.52078e-10	IGHA2/IGHA1/CXCL2/JCHAIN/KLK5/SLPI/CTSG/KLK7/LTF/DEFB1/TF/PI3/SPON2/IGHM/CXCL1/RARRES2/KRT6A/WFDC2/S100A9/CXCL14/CXCL9/CXCL13/S100A7	23
BP	GO:1990266	neutrophil migration	23/554	122/18722	1.16747e-12	2.19776e-10	1.52078e-10	SAA1/CCL14/CCL21/CX3CL1/CCL19/CXCL2/EDN1/EDN3/PECAM1/RAC2/LGALS3/CCL17/CCL5/CXCL1/CCL22/CCR7/CCL2/CD74/THBS4/S100A9/S100A8/CXCL9/CXCL13	23
BP	GO:0050673	epithelial cell proliferation	44/554	437/18722	1.32612e-12	2.42077e-10	1.6751e-10	NGFR/SFRP1/TP63/LIMS2/CAV2/CAV1/PTN/LEP/OSR1/ID1/SERPINB5/CDKN1C/FGF2/ZFP36/IL6/EPHA2/CCN3/F3/CDH3/KIT/RUNX3/HOXA5/EGFL7/EGFR/CYBA/NR4A1/FZD7/TNFAIP3/EGR3/CEBPB/CXCL12/SFN/KLK8/FST/CCL2/CLDN1/NFIB/THBS4/APOE/SFRP2/IGF2/FABP7/AREG/ESR1	44
BP	GO:0052547	regulation of peptidase activity	45/554	461/18722	2.14688e-12	3.80377e-10	2.63209e-10	NGFR/TP63/GSN/VSIR/ITIH5/CRYAB/CAV1/PROS1/AQP1/SERPINF2/SERPINB5/GAS6/C3/PAPLN/CCN1/A2M/SERPING1/SLPI/PI16/PCOLCE2/F3/LTF/SPOCK2/KLF4/IFI16/TIMP4/PRNP/CCN2/RARRES1/PI3/CD27/NR4A1/LCK/CST7/OPRPN/FBLN1/BIRC3/SFN/LAMP3/PYCARD/SFRP2/WFDC2/TFPI2/S100A9/S100A8	45
BP	GO:0032496	response to lipopolysaccharide	38/554	343/18722	2.6551e-12	4.5698e-10	3.16216e-10	CX3CL1/SELP/CXCL2/GGT5/EDN1/ALPL/TNFRSF1B/ZFP36/IL6/SLPI/CTSG/GSTP1/LTF/VIM/JUN/CSF2RB/TIMP4/CD36/LCN2/CCL5/FOS/NR4A1/SPON2/TNFAIP3/CXCL1/CCR7/CEBPB/ICAM1/ASS1/CCL2/CLDN1/MAOB/PYCARD/S100A9/S100A8/CXCL9/CXCL13/S100A7	38
BP	GO:0042110	T cell activation	46/554	487/18722	3.83786e-12	6.42201e-10	4.44383e-10	GSN/VSIR/CCL21/CCL19/CAV1/LEP/CD1C/ZFP36L2/ANXA1/IL27RA/TNFRSF1B/IL6/TCF7/IL4R/EGR1/RELB/KIT/RUNX3/RAC2/CORO1A/LGALS3/PRNP/CD3D/TGFBR2/IL7R/CD27/CD3E/CCL5/SOCS1/FZD7/CD7/LCK/SIT1/GPR183/CD48/CCR7/EGR3/VTCN1/CEBPB/ICAM1/CD2/CCL2/CD74/CD8A/PYCARD/IGF2	46
BP	GO:0019221	cytokine-mediated signaling pathway	45/554	472/18722	4.83991e-12	7.87989e-10	5.45264e-10	ACKR1/IL33/CCL14/IL34/CCL21/CX3CL1/CCL19/CAV1/CXCL2/LEP/ADIPOQ/GAS6/EDN1/IL27RA/TNFRSF1B/IL6/CTSG/F3/GSTP1/IL4R/EGR1/KIT/CCDC3/CSF2RB/CCL17/IL7R/CCL5/FOXC1/SOCS1/TNFAIP3/CXCL1/SPHK1/CCL22/CCR7/IL2RG/BIRC3/CXCL12/CRLF1/CCL2/CD74/PRLR/PYCARD/PYDC1/CXCL9/CXCL13	45
BP	GO:0006958	complement activation, classical pathway	21/554	108/18722	6.0361e-12	9.56881e-10	6.62132e-10	IGHA2/C7/IGHA1/C1R/CFI/C3/SERPING1/C1S/IGHD/IGKC/IGLC2/IGLC3/TRBC2/IGHM/IGLL5/IGHG2/IGLC7/C1QA/IGHG1/IGHG3/IGHG4	21
BP	GO:0002687	positive regulation of leukocyte migration	23/554	135/18722	1.05043e-11	1.62251e-09	1.12272e-09	IL34/CCL21/CX3CL1/SELP/CCL19/PTN/GAS6/EDN1/JAM2/IL6/EDN3/RAC2/LGALS3/CCL5/CCR7/ICAM1/RARRES2/CXCL12/CD74/THBS4/PYCARD/CXCL13/S100A7	23
BP	GO:0051384	response to glucocorticoid	24/554	148/18722	1.11128e-11	1.67359e-09	1.15808e-09	S100B/AQP1/ADIPOQ/ZFP36L2/ANXA1/EDN1/ALPL/FAM107A/ZFP36/IL6/GSTP1/ANXA3/CDO1/FOSB/EGFR/FOS/DUSP1/ICAM1/FBXO32/ASS1/CLDN1/MAOB/TAT/AREG	24
BP	GO:0002237	response to molecule of bacterial origin	38/554	363/18722	1.48956e-11	2.18856e-09	1.51442e-09	CX3CL1/SELP/CXCL2/GGT5/EDN1/ALPL/TNFRSF1B/ZFP36/IL6/SLPI/CTSG/GSTP1/LTF/VIM/JUN/CSF2RB/TIMP4/CD36/LCN2/CCL5/FOS/NR4A1/SPON2/TNFAIP3/CXCL1/CCR7/CEBPB/ICAM1/ASS1/CCL2/CLDN1/MAOB/PYCARD/S100A9/S100A8/CXCL9/CXCL13/S100A7	38
BP	GO:0000302	response to reactive oxygen species	29/554	222/18722	2.0203e-11	2.89768e-09	2.00511e-09	SOD3/CRYAB/FBLN5/AQP1/ANXA1/EDN1/IL6/MET/GSTP1/KLF2/JUN/AKR1C3/KLF4/EGFR/CD36/ETS1/LCN2/FOS/APOD/TXNIP/TNFAIP3/SPHK1/DUSP1/HBB/APOE/MMP2/CYP1B1/AREG/S100A7	29
BP	GO:0002460	adaptive immune response based on somatic recombination of immune receptors built from immunoglobulin superfamily domains	37/554	356/18722	3.43472e-11	4.8118e-09	3.32962e-09	IGHA2/C7/CCL19/IGHA1/C1R/CFI/CD1C/C3/ANXA1/IL27RA/TNFRSF1B/IL6/SERPING1/C1S/IL4R/RELB/GZMM/IGHD/IGKC/IGLC2/IGLC3/TRBC2/IL7R/CD27/IGHM/TNFAIP3/IGLL5/ICAM1/IGHG2/CD74/CD8A/IGLC7/C1QA/IGHG1/IGHG3/IGHG4/CXCL13	37
BP	GO:0022407	regulation of cell-cell adhesion	42/554	448/18722	4.38355e-11	6.00148e-09	4.15283e-09	VSIR/CCL21/CX3CL1/SELP/CCL19/CAV1/LEP/SERPINF2/ADIPOQ/ANXA1/IL27RA/C1QTNF1/IL6/IL4R/RUNX3/CCL28/KLF4/CORO1A/LGALS3/PRNP/TGFBR2/IL7R/ETS1/CD27/CD3E/CCL5/SOCS1/FXYD5/LCK/CCR7/EGR3/VTCN1/CEBPB/ICAM1/CXCL12/ASS1/CCL2/CD74/PYCARD/IGF2/FOXA1/CXCL13	42
BP	GO:0052548	regulation of endopeptidase activity	41/554	432/18722	5.14754e-11	6.89085e-09	4.76825e-09	NGFR/TP63/GSN/VSIR/ITIH5/CRYAB/PROS1/AQP1/SERPINF2/SERPINB5/GAS6/C3/PAPLN/CCN1/A2M/SERPING1/SLPI/F3/LTF/SPOCK2/KLF4/IFI16/TIMP4/PRNP/CCN2/RARRES1/PI3/CD27/NR4A1/LCK/CST7/OPRPN/BIRC3/SFN/LAMP3/PYCARD/SFRP2/WFDC2/TFPI2/S100A9/S100A8	41
BP	GO:0010466	negative regulation of peptidase activity	31/554	262/18722	5.38863e-11	7.05676e-09	4.88306e-09	ITIH5/CRYAB/PROS1/AQP1/SERPINF2/SERPINB5/GAS6/C3/PAPLN/A2M/SERPING1/SLPI/PI16/LTF/SPOCK2/KLF4/IFI16/TIMP4/PRNP/RARRES1/PI3/CD27/NR4A1/CST7/OPRPN/BIRC3/SFN/LAMP3/SFRP2/WFDC2/TFPI2	31
BP	GO:0002455	humoral immune response mediated by circulating immunoglobulin	21/554	121/18722	5.82282e-11	7.46312e-09	5.16425e-09	IGHA2/C7/IGHA1/C1R/CFI/C3/SERPING1/C1S/IGHD/IGKC/IGLC2/IGLC3/TRBC2/IGHM/IGLL5/IGHG2/IGLC7/C1QA/IGHG1/IGHG3/IGHG4	21
BP	GO:0070374	positive regulation of ERK1 and ERK2 cascade	28/554	217/18722	6.05514e-11	7.59921e-09	5.25841e-09	CCL14/CCL21/CX3CL1/CCL19/SERPINF2/GAS6/CHI3L1/SPRY2/FGF2/CAVIN3/CCN2/EGFR/GLIPR2/CCL17/CD36/CCL5/GPR183/CCL22/CCR7/PLA2G2A/ICAM1/CCL2/CD74/RAMP3/APOE/PYCARD/NPNT/S100A7	28
BP	GO:1901342	regulation of vasculature development	36/554	348/18722	7.27937e-11	8.94916e-09	6.19254e-09	SFRP1/HSPB6/NPR1/CLDN5/PTN/LEP/ENPP2/AQP1/ECSCR/ID1/C3/CHI3L1/SPRY2/ADAMTS1/RHOJ/FGF2/IL6/EPHA2/F3/ANXA3/KLF2/HOXA5/ANGPTL4/ISM1/KLF4/TGFBR2/ETS1/FOXC1/TNFAIP3/EMILIN1/SPHK1/S100A1/THBS4/SFRP2/CYP1B1/CXCL13	36
BP	GO:0022409	positive regulation of cell-cell adhesion	32/554	284/18722	9.47523e-11	1.1228e-08	7.76942e-09	VSIR/CCL21/CX3CL1/SELP/CCL19/CAV1/LEP/SERPINF2/ANXA1/IL27RA/IL6/IL4R/RUNX3/CORO1A/TGFBR2/IL7R/ETS1/CD27/CD3E/CCL5/SOCS1/LCK/CCR7/EGR3/VTCN1/ICAM1/CCL2/CD74/PYCARD/IGF2/FOXA1/CXCL13	32
BP	GO:0010951	negative regulation of endopeptidase activity	30/554	252/18722	9.50576e-11	1.1228e-08	7.76942e-09	ITIH5/CRYAB/PROS1/AQP1/SERPINF2/SERPINB5/GAS6/C3/PAPLN/A2M/SERPING1/SLPI/LTF/SPOCK2/KLF4/IFI16/TIMP4/PRNP/RARRES1/PI3/CD27/NR4A1/CST7/OPRPN/BIRC3/SFN/LAMP3/SFRP2/WFDC2/TFPI2	30
BP	GO:0043410	positive regulation of MAPK cascade	43/554	480/18722	1.09911e-10	1.26325e-08	8.74126e-09	CCL14/CAV2/IL34/CCL21/CX3CL1/CCL19/LEP/SERPINF2/GAS6/CHI3L1/SPRY2/EDN1/C1QTNF1/FGF2/LIF/IL6/IGFBP6/CAVIN3/EDN3/KIT/CCN2/EGFR/GLIPR2/CCL17/CD36/CD27/CCL5/FZD7/SPHK1/GPR183/CCL22/CCR7/NTRK2/PLA2G2A/ICAM1/CCL2/CD74/RAMP3/APOE/PYCARD/IGF2/NPNT/S100A7	43
BP	GO:1903037	regulation of leukocyte cell-cell adhesion	35/554	336/18722	1.11142e-10	1.26325e-08	8.74126e-09	VSIR/CCL21/SELP/CCL19/CAV1/LEP/ANXA1/IL27RA/IL6/IL4R/RUNX3/CCL28/KLF4/CORO1A/LGALS3/PRNP/TGFBR2/IL7R/ETS1/CD27/CD3E/CCL5/SOCS1/LCK/CCR7/EGR3/VTCN1/CEBPB/ICAM1/CXCL12/ASS1/CCL2/CD74/PYCARD/IGF2	35
BP	GO:1903131	mononuclear cell differentiation	40/554	426/18722	1.23454e-10	1.3772e-08	9.52981e-09	SFRP1/VSIR/IL34/CCL19/LEP/MFNG/GAS6/ITM2A/CD79B/ZFP36L2/ANXA1/IL6/TCF7/IL4R/EGR1/RELB/TPD52/KIT/RUNX3/CMTM7/JUN/IFI16/CD3D/TGFBR2/CD79A/IL7R/CD27/CD3E/SOCS1/FZD7/LCK/GPR183/CCR7/EGR3/CEBPB/CD2/CD74/CD8A/LY6D/UBD	40
BP	GO:0008037	cell recognition	28/554	225/18722	1.4316e-10	1.56799e-08	1.085e-08	IGHA2/CCL21/CCL19/IGHA1/NDN/MFGE8/PTX3/IGHD/PECAM1/FOLR1/IGKC/IGLC2/TNN/IGLC3/TRBC2/LGALS3/CD36/SPON2/IGHM/IGLL5/CCR7/IGHG2/FOLR2/IGLC7/CNTNAP2/IGHG1/IGHG3/IGHG4	28
BP	GO:0002253	activation of immune response	37/554	375/18722	1.5422e-10	1.65896e-08	1.14795e-08	IGHA2/C7/IGHA1/C1R/CFI/MFAP4/C3/CD79B/A2M/SERPING1/C1S/BTNL9/IGHD/IGKC/IGLC2/IFI16/IGLC3/TRBC2/LGALS3/PRNP/CD79A/CD3E/CFD/IGHM/LCK/IGLL5/CCR7/VTCN1/IGHG2/KCNN4/IGLC7/C1QA/PYCARD/CFB/IGHG1/IGHG3/IGHG4	37
BP	GO:0045765	regulation of angiogenesis	35/554	342/18722	1.80943e-10	1.91228e-08	1.32324e-08	SFRP1/HSPB6/NPR1/CLDN5/PTN/LEP/ENPP2/AQP1/ECSCR/C3/CHI3L1/SPRY2/ADAMTS1/RHOJ/FGF2/IL6/EPHA2/F3/ANXA3/KLF2/HOXA5/ANGPTL4/ISM1/KLF4/TGFBR2/ETS1/FOXC1/TNFAIP3/EMILIN1/SPHK1/S100A1/THBS4/SFRP2/CYP1B1/CXCL13	35
BP	GO:0048659	smooth muscle cell proliferation	25/554	184/18722	2.13709e-10	2.21963e-08	1.53591e-08	CNN1/CX3CL1/NPR1/SERPINF2/ADIPOQ/S1PR1/NDRG2/ADAMTS1/EDN1/FGF2/IL6/CCN3/GSTP1/ELN/JUN/KLF4/EGFR/TGFBR2/CYBA/CCL5/APOD/TNFAIP3/OGN/APOE/MMP2	25
BP	GO:0070555	response to interleukin-1	22/554	143/18722	2.31837e-10	2.36709e-08	1.63795e-08	SFRP1/CCL14/CCL21/CX3CL1/CCL19/CHI3L1/ANXA1/EDN1/IL6/EGR1/KLF2/CYBA/CCL17/ETS1/LCN2/CCL5/CCL22/GBP2/CEBPB/ICAM1/CCL2/PYCARD	22
BP	GO:0002443	leukocyte mediated immunity	40/554	440/18722	3.25659e-10	3.26962e-08	2.26248e-08	IGHA2/C7/IGHA1/C1R/LEP/CFI/CD1C/PTGDS/C3/IL27RA/TNFRSF1B/IL6/SERPING1/C1S/CTSG/IL4R/ANXA3/GZMM/IGHD/KIT/IGKC/IGLC2/IGLC3/RAC2/TRBC2/CORO1A/IL7R/CD27/SPON2/IGHM/IGLL5/ICAM1/IGHG2/CD74/CD8A/IGLC7/C1QA/IGHG1/IGHG3/IGHG4	40
BP	GO:1990868	response to chemokine	18/554	97/18722	4.41789e-10	4.29248e-08	2.97026e-08	ACKR1/CCL14/CCL21/CX3CL1/CCL19/CXCL2/EDN1/CCL17/CCL5/FOXC1/CXCL1/CCL22/CCR7/DUSP1/CXCL12/CCL2/CXCL9/CXCL13	18
BP	GO:1990869	cellular response to chemokine	18/554	97/18722	4.41789e-10	4.29248e-08	2.97026e-08	ACKR1/CCL14/CCL21/CX3CL1/CCL19/CXCL2/EDN1/CCL17/CCL5/FOXC1/CXCL1/CCL22/CCR7/DUSP1/CXCL12/CCL2/CXCL9/CXCL13	18
BP	GO:0002688	regulation of leukocyte chemotaxis	20/554	122/18722	4.81035e-10	4.59961e-08	3.18279e-08	IL34/CCL21/CCL19/PTN/GAS6/EDN1/IL6/CCN3/EDN3/RAC2/CCL5/CCR7/DUSP1/RARRES2/CXCL12/CCL2/CD74/THBS4/CXCL13/S100A7	20
BP	GO:0050920	regulation of chemotaxis	27/554	223/18722	5.70516e-10	5.36998e-08	3.71586e-08	IL34/CCL21/CCL19/PTN/GAS6/S1PR1/EDN1/FGF2/IL6/CCN3/F3/MET/GSTP1/EDN3/SEMA3G/RAC2/CCL5/GPR183/CCR7/DUSP1/RARRES2/CXCL12/CCL2/CD74/THBS4/CXCL13/S100A7	27
BP	GO:1903039	positive regulation of leukocyte cell-cell adhesion	28/554	239/18722	5.86775e-10	5.43805e-08	3.76296e-08	VSIR/CCL21/SELP/CCL19/CAV1/LEP/ANXA1/IL27RA/IL6/IL4R/RUNX3/CORO1A/TGFBR2/IL7R/ETS1/CD27/CD3E/CCL5/SOCS1/LCK/CCR7/EGR3/VTCN1/ICAM1/CCL2/CD74/PYCARD/IGF2	28
BP	GO:1901654	response to ketone	25/554	194/18722	6.67728e-10	6.09453e-08	4.21723e-08	SFRP1/CCL21/CCL19/CAV1/PTN/AQP1/GAS6/EDN1/KLF2/AKR1C3/KLF4/FOSB/EGFR/CYBA/FOS/OXTR/TXNIP/CCR7/DUSP1/ICAM1/FBXO32/ASS1/TNC/CLDN1/MAOB	25
BP	GO:0070098	chemokine-mediated signaling pathway	17/554	88/18722	7.02057e-10	6.31223e-08	4.36787e-08	ACKR1/CCL14/CCL21/CX3CL1/CCL19/CXCL2/EDN1/CCL17/CCL5/FOXC1/CXCL1/CCL22/CCR7/CXCL12/CCL2/CXCL9/CXCL13	17
BP	GO:0048660	regulation of smooth muscle cell proliferation	24/554	180/18722	7.28325e-10	6.4521e-08	4.46466e-08	CNN1/CX3CL1/NPR1/SERPINF2/ADIPOQ/S1PR1/NDRG2/ADAMTS1/EDN1/FGF2/IL6/GSTP1/ELN/JUN/KLF4/EGFR/TGFBR2/CYBA/CCL5/APOD/TNFAIP3/OGN/APOE/MMP2	24
BP	GO:0006910	phagocytosis, recognition	18/554	100/18722	7.42901e-10	6.48585e-08	4.48801e-08	IGHA2/IGHA1/MFGE8/PTX3/IGHD/IGKC/IGLC2/IGLC3/TRBC2/CD36/SPON2/IGHM/IGLL5/IGHG2/IGLC7/IGHG1/IGHG3/IGHG4	18
BP	GO:0071347	cellular response to interleukin-1	19/554	113/18722	8.396e-10	7.22536e-08	4.99972e-08	SFRP1/CCL14/CCL21/CX3CL1/CCL19/CHI3L1/EDN1/IL6/EGR1/KLF2/CCL17/LCN2/CCL5/CCL22/GBP2/CEBPB/ICAM1/CCL2/PYCARD	19
BP	GO:0050863	regulation of T cell activation	33/554	329/18722	1.01714e-09	8.62991e-08	5.97163e-08	VSIR/CCL21/CCL19/CAV1/LEP/ANXA1/IL27RA/TNFRSF1B/IL6/TCF7/IL4R/RUNX3/RAC2/CORO1A/LGALS3/PRNP/TGFBR2/IL7R/CD27/CD3E/CCL5/SOCS1/LCK/SIT1/CCR7/EGR3/VTCN1/CEBPB/CD2/CCL2/CD74/PYCARD/IGF2	33
BP	GO:0050921	positive regulation of chemotaxis	21/554	141/18722	1.09831e-09	9.18921e-08	6.35865e-08	IL34/CCL21/CCL19/PTN/GAS6/S1PR1/EDN1/FGF2/IL6/F3/MET/EDN3/RAC2/CCL5/CCR7/RARRES2/CXCL12/CD74/THBS4/CXCL13/S100A7	21
BP	GO:0042060	wound healing	38/554	422/18722	1.19729e-09	9.88011e-08	6.83673e-08	SAA1/CX3CL1/SELP/CAV1/PROS1/SERPINF2/GAS6/ANXA1/EDN1/MMRN1/CNN2/CCN1/C1QTNF1/FGF2/IL6/MYL9/SERPING1/F3/MYLK/CDH3/VWF/DST/EGFR/TGFBR2/F2RL2/CD36/ETS1/FZD7/TNFAIP3/LCK/FBLN1/HBB/TNC/KRT6A/CLDN1/APOE/TFPI2/S100A8	38
BP	GO:0002449	lymphocyte mediated immunity	34/554	350/18722	1.30814e-09	1.0649e-07	7.36876e-08	IGHA2/C7/IGHA1/C1R/LEP/CFI/CD1C/C3/IL27RA/TNFRSF1B/IL6/SERPING1/C1S/IL4R/GZMM/IGHD/IGKC/IGLC2/IGLC3/TRBC2/CORO1A/IL7R/CD27/IGHM/IGLL5/ICAM1/IGHG2/CD74/CD8A/IGLC7/C1QA/IGHG1/IGHG3/IGHG4	34
BP	GO:0033002	muscle cell proliferation	28/554	248/18722	1.37108e-09	1.10125e-07	7.62032e-08	CNN1/CX3CL1/RBP4/NPR1/SERPINF2/ADIPOQ/S1PR1/NDRG2/ADAMTS1/EDN1/FGF2/IL6/CCN3/GSTP1/ELN/JUN/KLF4/EGFR/TGFBR2/PIM1/CYBA/CCL5/FOXC1/APOD/TNFAIP3/OGN/APOE/MMP2	28
BP	GO:0002548	monocyte chemotaxis	15/554	70/18722	1.55618e-09	1.23348e-07	8.53529e-08	CCL14/CCL21/CX3CL1/CCL19/ANXA1/IL6/CCN3/LGALS3/CCL17/CCL5/CCL22/DUSP1/CXCL12/CCL2/S100A7	15
BP	GO:0001503	ossification	37/554	408/18722	1.63999e-09	1.27052e-07	8.79163e-08	SFRP1/TP63/CHRDL1/PTN/LEP/OSR1/TWIST2/S1PR1/ALPL/JUNB/CCN1/FGF2/PDLIM7/IL6/EPHA2/LTF/EGR2/RUNX3/ID3/TNN/CLEC3B/CCN2/EGFR/TMEM119/FOXC1/SRGN/CEBPB/MRC2/WNT11/MGP/TNC/MMP2/SFRP2/IGF2/COL11A1/AREG/NPNT	37
BP	GO:0019731	antibacterial humoral response	14/554	60/18722	1.6634e-09	1.27052e-07	8.79163e-08	IGHA2/IGHA1/JCHAIN/KLK5/SLPI/CTSG/KLK7/LTF/DEFB1/TF/PI3/SPON2/IGHM/WFDC2	14
BP	GO:0032103	positive regulation of response to external stimulus	38/554	427/18722	1.66619e-09	1.27052e-07	8.79163e-08	IL33/IL34/CCL21/CX3CL1/CCL19/PTN/FABP4/SERPINF2/GAS6/S1PR1/C3/KLK5/EDN1/FGF2/IL6/F3/LPL/MET/KLK7/EDN3/IFI16/RAC2/EGFR/CYBA/ETS1/CCL5/CCR7/CEBPB/PLA2G2A/RARRES2/CXCL12/CD74/THBS4/PYCARD/S100A9/S100A8/CXCL13/S100A7	38
BP	GO:0001894	tissue homeostasis	29/554	268/18722	1.87787e-09	1.41404e-07	9.7847e-08	IGHA2/RBP4/IGHA1/CLDN5/JCHAIN/S1PR1/JAM2/IL6/CDH3/LTF/PECAM1/IGKC/RAC2/CORO1A/CCN2/EGFR/PIGR/TF/TMEM119/PDK4/FOXC1/TNFAIP3/OPRPN/ALDH1A1/PROM1/CLDN1/IGHG3/TFF1/PIP	29
BP	GO:0030098	lymphocyte differentiation	35/554	374/18722	2.00863e-09	1.49383e-07	1.03368e-07	SFRP1/VSIR/CCL19/LEP/MFNG/GAS6/ITM2A/CD79B/ZFP36L2/ANXA1/IL6/TCF7/IL4R/EGR1/RELB/TPD52/KIT/RUNX3/CMTM7/CD3D/TGFBR2/CD79A/IL7R/CD27/CD3E/SOCS1/FZD7/LCK/GPR183/CCR7/EGR3/CD2/CD74/CD8A/LY6D	35
BP	GO:0002690	positive regulation of leukocyte chemotaxis	17/554	94/18722	2.04554e-09	1.50272e-07	1.03984e-07	IL34/CCL21/CCL19/PTN/GAS6/EDN1/IL6/EDN3/RAC2/CCL5/CCR7/RARRES2/CXCL12/CD74/THBS4/CXCL13/S100A7	17
BP	GO:0016064	immunoglobulin mediated immune response	25/554	207/18722	2.62441e-09	1.90475e-07	1.31803e-07	IGHA2/C7/IGHA1/C1R/CFI/C3/IL27RA/SERPING1/C1S/IL4R/IGHD/IGKC/IGLC2/IGLC3/TRBC2/CD27/IGHM/IGLL5/IGHG2/CD74/IGLC7/C1QA/IGHG1/IGHG3/IGHG4	25
BP	GO:0050678	regulation of epithelial cell proliferation	35/554	381/18722	3.26895e-09	2.3443e-07	1.62219e-07	NGFR/SFRP1/TP63/LIMS2/CAV2/CAV1/PTN/LEP/OSR1/ID1/SERPINB5/CDKN1C/FGF2/ZFP36/F3/CDH3/RUNX3/HOXA5/EGFL7/EGFR/CYBA/NR4A1/FZD7/TNFAIP3/EGR3/CXCL12/SFN/CCL2/CLDN1/NFIB/THBS4/APOE/SFRP2/IGF2/AREG	35
BP	GO:0019724	B cell mediated immunity	25/554	210/18722	3.54063e-09	2.50927e-07	1.73633e-07	IGHA2/C7/IGHA1/C1R/CFI/C3/IL27RA/SERPING1/C1S/IL4R/IGHD/IGKC/IGLC2/IGLC3/TRBC2/CD27/IGHM/IGLL5/IGHG2/CD74/IGLC7/C1QA/IGHG1/IGHG3/IGHG4	25
BP	GO:0043491	protein kinase B signaling	25/554	211/18722	3.90725e-09	2.73689e-07	1.89384e-07	CCL21/CX3CL1/CCL19/LEP/GAS6/CHI3L1/SPRY2/C1QTNF1/FGF2/EPHA2/F3/MET/CAVIN3/NOP53/AKR1C3/KLF4/HCLS1/EGFR/CCL5/CCR7/PHLDA3/NTRK2/CCL2/RAMP3/IGF2	25
BP	GO:0048247	lymphocyte chemotaxis	14/554	64/18722	4.11608e-09	2.85003e-07	1.97213e-07	SAA1/CCL14/CCL21/CX3CL1/CCL19/GAS6/CH25H/CCL17/CCL5/GPR183/CCL22/CCL2/CXCL13/S100A7	14
BP	GO:0060249	anatomical structure homeostasis	31/554	314/18722	4.82089e-09	3.30012e-07	2.28358e-07	IGHA2/CX3CL1/RBP4/IGHA1/CLDN5/JCHAIN/S1PR1/JAM2/IL6/CDH3/LTF/PECAM1/IGKC/RAC2/CORO1A/CCN2/EGFR/PIGR/TF/TMEM119/PDK4/FOXC1/TNFAIP3/OPRPN/ALDH1A1/CALB2/PROM1/CLDN1/IGHG3/TFF1/PIP	31
BP	GO:0045861	negative regulation of proteolysis	33/554	351/18722	5.22423e-09	3.53604e-07	2.44683e-07	ITIH5/CRYAB/PROS1/AQP1/SERPINF2/SERPINB5/GAS6/C3/PAPLN/A2M/SERPING1/SLPI/PI16/LTF/NOP53/SPOCK2/KLF4/IFI16/TIMP4/PRNP/RARRES1/PI3/CD27/NR4A1/CST7/OPRPN/GAS1/BIRC3/SFN/LAMP3/SFRP2/WFDC2/TFPI2	33
BP	GO:0006979	response to oxidative stress	38/554	446/18722	5.55869e-09	3.72062e-07	2.57455e-07	SOD3/CRYAB/GPX3/FBLN5/AQP1/ADIPOQ/ANXA1/EDN1/IL6/CYGB/MET/GSTP1/RCAN1/KLF2/JUN/AKR1C3/KLF4/PRNP/EGFR/CD36/ETS1/LCN2/MMP3/FOS/APOD/TXNIP/TNFAIP3/SPHK1/DUSP1/SCARA3/HBB/PDLIM1/APOE/MMP2/CYP1B1/TAT/AREG/S100A7	38
BP	GO:0050870	positive regulation of T cell activation	25/554	216/18722	6.33503e-09	4.14811e-07	2.87037e-07	VSIR/CCL21/CCL19/CAV1/LEP/ANXA1/IL27RA/IL6/IL4R/RUNX3/CORO1A/TGFBR2/IL7R/CD27/CD3E/CCL5/SOCS1/LCK/CCR7/EGR3/VTCN1/CCL2/CD74/PYCARD/IGF2	25
BP	GO:0006911	phagocytosis, engulfment	19/554	127/18722	6.3351e-09	4.14811e-07	2.87037e-07	GSN/IGHA2/IGHA1/C3/MFGE8/IGHD/IGKC/IGLC2/IGLC3/RAC2/TRBC2/CD36/IGHM/IGLL5/IGHG2/IGLC7/IGHG1/IGHG3/IGHG4	19
BP	GO:0051896	regulation of protein kinase B signaling	23/554	185/18722	6.51227e-09	4.21827e-07	2.91891e-07	CCL21/CX3CL1/CCL19/LEP/GAS6/CHI3L1/SPRY2/C1QTNF1/FGF2/EPHA2/F3/MET/CAVIN3/NOP53/AKR1C3/KLF4/HCLS1/EGFR/CCR7/PHLDA3/NTRK2/RAMP3/IGF2	23
BP	GO:0010038	response to metal ion	34/554	373/18722	6.70722e-09	4.29833e-07	2.97431e-07	KRT14/KCNMB1/SOD3/CAV1/MT1M/MT1X/FABP4/AQP1/KCNIP2/EDN1/JUNB/SYT8/CPNE3/KIT/JUN/AKR1C3/FOSB/PRNP/EGFR/TF/LCN2/FOS/TXNIP/DUSP1/ICAM1/ASS1/C1QA/CLDN1/MAOB/MT1E/TAT/TFF1/S100A8/SYT13	34
BP	GO:2000146	negative regulation of cell motility	33/554	359/18722	9.13284e-09	5.79118e-07	4.00732e-07	NGFR/SFRP1/CCL21/CX3CL1/CLDN5/PTN/ADIPOQ/CNN2/IL27RA/FGF2/MMRN2/CCN3/CYGB/GSTP1/MEOX2/KRT16/CCL28/TNN/KLF4/TACSTD2/APOD/EMILIN1/DUSP1/FBLN1/CXCL12/WNT11/CCL2/PODN/CD74/APOE/SFRP2/CYP1B1/CXCL13	33
BP	GO:0001667	ameboidal-type cell migration	39/554	475/18722	9.74706e-09	6.11628e-07	4.23227e-07	FAT2/SOX17/PTN/ENPP2/ID1/ITGB4/ANXA1/EDN1/RHOJ/FGF2/S100A2/MMRN2/EPHA2/CCN3/CYGB/MET/ANXA3/CLEC14A/MEOX2/KRT16/EDN3/KIT/SOX18/SEMA3G/FOLR1/KLF4/TGFBR2/GLIPR2/TACSTD2/LGALS12/ETS1/LCN2/NR4A1/EGR3/WNT11/PDLIM1/APOE/CYP1B1/CXCL13	39
BP	GO:0050878	regulation of body fluid levels	34/554	379/18722	1.00288e-08	6.22818e-07	4.30971e-07	SAA1/TP63/SELP/NPR1/CAV1/PROS1/AQP1/SERPINF2/GAS6/EDN1/MMRN1/C1QTNF1/IL6/MYL9/SERPING1/F3/MET/CDO1/VWF/KRT16/EGFR/CYBA/F2RL2/CD36/OXTR/LCK/FBLN1/SFN/HBB/KCNN4/CLDN1/APOE/PRLR/TFPI2	34
BP	GO:0030336	negative regulation of cell migration	32/554	344/18722	1.15609e-08	7.0541e-07	4.88121e-07	NGFR/SFRP1/CCL21/CX3CL1/CLDN5/PTN/ADIPOQ/CNN2/IL27RA/FGF2/MMRN2/CCN3/CYGB/GSTP1/MEOX2/KRT16/CCL28/TNN/KLF4/TACSTD2/APOD/EMILIN1/DUSP1/CXCL12/WNT11/CCL2/PODN/CD74/APOE/SFRP2/CYP1B1/CXCL13	32
BP	GO:0022612	gland morphogenesis	18/554	118/18722	1.15929e-08	7.0541e-07	4.88121e-07	SFRP1/TP63/LIMS2/CAV1/PTN/SERPINB5/IL6/EPHA2/TGFBR2/TNFAIP3/CEBPB/SOSTDC1/TNC/NFIB/FOXA1/AREG/NTN4/ESR1	18
BP	GO:0090130	tissue migration	33/554	365/18722	1.37212e-08	8.26562e-07	5.71955e-07	FAT2/PTN/ENPP2/ACTG2/ID1/ANXA1/EDN1/RHOJ/FGF2/S100A2/MMRN2/EPHA2/CCN3/MET/ANXA3/CLEC14A/MEOX2/KRT16/KIT/SOX18/ACTA2/KLF4/TGFBR2/GLIPR2/TACSTD2/LGALS12/ETS1/LCN2/NR4A1/EGR3/APOE/CYP1B1/CXCL13	33
BP	GO:0051271	negative regulation of cellular component movement	33/554	367/18722	1.56808e-08	9.35257e-07	6.47169e-07	NGFR/SFRP1/CCL21/CX3CL1/CLDN5/PTN/ADIPOQ/CNN2/IL27RA/FGF2/MMRN2/CCN3/CYGB/GSTP1/MEOX2/KRT16/CCL28/TNN/KLF4/TACSTD2/APOD/EMILIN1/DUSP1/FBLN1/CXCL12/WNT11/CCL2/PODN/CD74/APOE/SFRP2/CYP1B1/CXCL13	33
BP	GO:0099024	plasma membrane invagination	19/554	136/18722	2.00528e-08	1.1843e-06	8.19497e-07	GSN/IGHA2/IGHA1/C3/MFGE8/IGHD/IGKC/IGLC2/IGLC3/RAC2/TRBC2/CD36/IGHM/IGLL5/IGHG2/IGLC7/IGHG1/IGHG3/IGHG4	19
BP	GO:0042113	B cell activation	31/554	334/18722	2.06899e-08	1.21006e-06	8.37322e-07	SFRP1/IGHA2/IGHA1/MFNG/ITM2A/CD79B/ZFP36L2/IL27RA/IL6/TPD52/IGHD/KIT/CMTM7/IGKC/IGLC2/IGLC3/TRBC2/CD79A/IL7R/CD27/IGHM/TNFAIP3/GPR183/IGLL5/IGHG2/CD74/IGLC7/MZB1/IGHG1/IGHG3/IGHG4	31
BP	GO:0040013	negative regulation of locomotion	34/554	391/18722	2.18078e-08	1.26318e-06	8.74079e-07	NGFR/SFRP1/CCL21/CX3CL1/CLDN5/PTN/ADIPOQ/CNN2/IL27RA/FGF2/MMRN2/CCN3/CYGB/GSTP1/MEOX2/KRT16/CCL28/SEMA3G/TNN/KLF4/TACSTD2/APOD/EMILIN1/DUSP1/FBLN1/CXCL12/WNT11/CCL2/PODN/CD74/APOE/SFRP2/CYP1B1/CXCL13	34
BP	GO:0010811	positive regulation of cell-substrate adhesion	18/554	123/18722	2.26184e-08	1.29755e-06	8.97861e-07	SFRP1/LIMS2/CCL21/CX3CL1/PTN/CCN1/COL16A1/FBLN2/CCL28/SPOCK2/CD36/NEDD9/CD3E/EMILIN1/CCR7/OLFM4/CCDC80/NPNT	18
BP	GO:0050730	regulation of peptidyl-tyrosine phosphorylation	27/554	264/18722	2.2832e-08	1.29755e-06	8.97861e-07	SFRP1/IL34/CAV1/LEP/ENPP2/ADIPOQ/GAS6/SOCS3/LIF/IL6/KIT/PECAM1/HCLS1/PRNP/EGFR/CD36/NEDD9/CD3E/CCL5/SOCS1/ICAM1/CRLF1/CD74/THBS4/SFRP2/IGF2/AREG	27
BP	GO:0031099	regeneration	23/554	198/18722	2.39266e-08	1.33457e-06	9.23481e-07	PTN/GAS6/NNMT/ANXA1/IL6/CCN3/GSTP1/ANXA3/RGMA/FOLR1/KLF4/KLK6/EGFR/TGFBR2/FZD7/APOD/LGR6/KLF5/CEBPB/CXCL12/KLK8/TNC/CLDN1	23
BP	GO:0050864	regulation of B cell activation	23/554	198/18722	2.39266e-08	1.33457e-06	9.23481e-07	SFRP1/IGHA2/IGHA1/ZFP36L2/IL27RA/IL6/IGHD/IGKC/IGLC2/IGLC3/TRBC2/CD27/IGHM/TNFAIP3/GPR183/IGLL5/IGHG2/CD74/IGLC7/MZB1/IGHG1/IGHG3/IGHG4	23
BP	GO:0018108	peptidyl-tyrosine phosphorylation	33/554	375/18722	2.64642e-08	1.46257e-06	1.01206e-06	SFRP1/IL34/CAV1/LEP/ENPP2/ADIPOQ/GAS6/SOCS3/LIF/IL6/EPHA2/MET/KIT/PECAM1/HCLS1/PRNP/EGFR/CD36/NEDD9/CD3E/CCL5/SOCS1/LCK/NTRK2/ICAM1/CRLF1/CD74/THBS4/PRLR/EFEMP1/SFRP2/IGF2/AREG	33
BP	GO:0018212	peptidyl-tyrosine modification	33/554	378/18722	3.20654e-08	1.75602e-06	1.21511e-06	SFRP1/IL34/CAV1/LEP/ENPP2/ADIPOQ/GAS6/SOCS3/LIF/IL6/EPHA2/MET/KIT/PECAM1/HCLS1/PRNP/EGFR/CD36/NEDD9/CD3E/CCL5/SOCS1/LCK/NTRK2/ICAM1/CRLF1/CD74/THBS4/PRLR/EFEMP1/SFRP2/IGF2/AREG	33
BP	GO:0097305	response to alcohol	26/554	253/18722	3.77249e-08	2.04734e-06	1.4167e-06	SFRP1/KCNMB1/CCL21/RBP4/CCL19/CLDN5/LEP/ADIPOQ/GSTP1/CDO1/KLF2/CES1/RGS2/AKR1C3/KLF4/FOSB/TGFBR2/CYBA/CD27/FOS/CCR7/ICAM1/TNC/CLDN1/MAOB/S100A8	26
BP	GO:0007015	actin filament organization	36/554	441/18722	4.24105e-08	2.28108e-06	1.57844e-06	SFRP1/GSN/CCL21/CX3CL1/ID1/SERPINF2/SYNPO/S1PR1/LMOD1/FAM107A/TPM2/CDC42EP5/MET/GMFG/SORBS1/ELN/HCLS1/RAC2/CORO1A/CCN2/RND3/TACSTD2/TF/NEDD9/CDC42EP1/FSCN1/FAM171A1/COTL1/CCR7/ICAM1/CXCL12/WNT11/SHROOM1/PDLIM1/ARHGAP40/PYCARD	36
BP	GO:0010810	regulation of cell-substrate adhesion	24/554	221/18722	4.41111e-08	2.35155e-06	1.6272e-06	SFRP1/LIMS2/CCL21/CX3CL1/PTN/CCN1/FAM107A/COL16A1/FBLN2/CCL28/SPOCK2/RAC2/TACSTD2/CD36/NEDD9/CD3E/FZD7/APOD/EMILIN1/CCR7/OLFM4/FBLN1/CCDC80/NPNT	24
BP	GO:0071675	regulation of mononuclear cell migration	17/554	115/18722	4.7695e-08	2.5203e-06	1.74397e-06	IL34/CCL21/GAS6/JAM2/IL27RA/CCN3/LGALS3/CCL5/APOD/CCR7/DUSP1/RARRES2/CXCL12/CCL2/PYCARD/CXCL13/S100A7	17
BP	GO:0010324	membrane invagination	19/554	144/18722	5.14972e-08	2.69509e-06	1.86492e-06	GSN/IGHA2/IGHA1/C3/MFGE8/IGHD/IGKC/IGLC2/IGLC3/RAC2/TRBC2/CD36/IGHM/IGLL5/IGHG2/IGLC7/IGHG1/IGHG3/IGHG4	19
BP	GO:0030217	T cell differentiation	26/554	257/18722	5.18975e-08	2.69509e-06	1.86492e-06	VSIR/CCL19/LEP/ZFP36L2/ANXA1/IL6/TCF7/IL4R/EGR1/RELB/KIT/RUNX3/CD3D/TGFBR2/IL7R/CD27/CD3E/SOCS1/FZD7/LCK/GPR183/CCR7/EGR3/CD2/CD74/CD8A	26
BP	GO:2000107	negative regulation of leukocyte apoptotic process	11/554	46/18722	7.19491e-08	3.70446e-06	2.56337e-06	CCL21/CCL19/GAS6/HCLS1/IL7R/CD27/CCL5/CCR7/CXCL12/CD74/PIP	11
BP	GO:0009636	response to toxic substance	26/554	262/18722	7.65679e-08	3.90886e-06	2.70481e-06	SOD3/GPX3/FBLN5/MT1M/MT1X/INMT/CYGB/GSTP1/CES1/PIM1/CD36/LCN2/CCL5/FOS/ALDH1A1/ASS1/HBB/SLC6A14/CLDN1/MAOB/APOE/MT1E/CYP1B1/GSTA1/S100A9/AKR7A3	26
BP	GO:0070663	regulation of leukocyte proliferation	25/554	245/18722	7.9281e-08	4.01335e-06	2.77711e-06	IL33/VSIR/IL34/CCL19/LEP/ANXA1/IL27RA/TNFRSF1B/IL6/GSTP1/RAC2/CORO1A/LGALS3/PRNP/TGFBR2/CD3E/CCL5/TNFAIP3/GPR183/VTCN1/CEBPB/CD74/PYCARD/IGF2/MZB1	25
BP	GO:0070661	leukocyte proliferation	29/554	318/18722	8.69847e-08	4.33431e-06	2.99921e-06	IL33/VSIR/IL34/CX3CL1/CCL19/LEP/ANXA1/IL27RA/TNFRSF1B/IL6/GSTP1/KIT/RAC2/CORO1A/LGALS3/PRNP/TGFBR2/CD79A/IL7R/CD3E/CCL5/TNFAIP3/GPR183/VTCN1/CEBPB/CD74/PYCARD/IGF2/MZB1	29
BP	GO:0045444	fat cell differentiation	24/554	229/18722	8.70603e-08	4.33431e-06	2.99921e-06	LAMB3/SFRP1/LEP/FABP4/ADIPOQ/ZFP36L2/ZFP36/IL6/LPL/EGR2/CCDC3/RGS2/KLF4/PIM1/LGALS12/NR4A1/MEDAG/SOCS1/KLF5/CEBPB/RARRES2/WIF1/FRZB/SFRP2	24
BP	GO:0051897	positive regulation of protein kinase B signaling	17/554	120/18722	9.05612e-08	4.47165e-06	3.09424e-06	CCL21/CX3CL1/CCL19/LEP/GAS6/CHI3L1/SPRY2/C1QTNF1/FGF2/F3/MET/AKR1C3/HCLS1/EGFR/CCR7/RAMP3/IGF2	17
BP	GO:0010631	epithelial cell migration	31/554	357/18722	9.50499e-08	4.65513e-06	3.2212e-06	FAT2/PTN/ENPP2/ID1/ANXA1/EDN1/RHOJ/FGF2/S100A2/MMRN2/EPHA2/CCN3/MET/ANXA3/CLEC14A/MEOX2/KRT16/KIT/SOX18/KLF4/TGFBR2/GLIPR2/TACSTD2/LGALS12/ETS1/LCN2/NR4A1/EGR3/APOE/CYP1B1/CXCL13	31
BP	GO:0090132	epithelium migration	31/554	360/18722	1.1472e-07	5.57319e-06	3.85648e-06	FAT2/PTN/ENPP2/ID1/ANXA1/EDN1/RHOJ/FGF2/S100A2/MMRN2/EPHA2/CCN3/MET/ANXA3/CLEC14A/MEOX2/KRT16/KIT/SOX18/KLF4/TGFBR2/GLIPR2/TACSTD2/LGALS12/ETS1/LCN2/NR4A1/EGR3/APOE/CYP1B1/CXCL13	31
BP	GO:0007517	muscle organ development	29/554	327/18722	1.58225e-07	7.62517e-06	5.27638e-06	CAV2/S100B/CRYAB/ITGA7/CAV1/S1PR1/TAGLN/LIF/MYLK/FHL1/EGR1/ELN/MEOX2/RCAN1/EGR2/YBX3/ID3/MRAS/FOS/NR4A1/FOXC1/KLF5/ATF3/EGR3/ASS1/BTG2/IGF2/COL11A1/ZBTB18	29
BP	GO:0072503	cellular divalent inorganic cation homeostasis	37/554	486/18722	1.62793e-07	7.78307e-06	5.38564e-06	SAA1/CCL14/CAV2/CCL21/CX3CL1/CCL19/CAV1/MT1M/MT1X/S1PR1/EDN1/C1QTNF1/FGF2/S1PR4/EDN3/CCL28/NMB/CORO1A/PRNP/CD52/CYBA/F2RL2/CD36/CCL5/OXTR/LCK/CCR7/CXCL12/CALB2/RAMP3/APOE/MT1E/S100A9/S100A8/ESR1/CXCL9/CXCL13	37
BP	GO:0033627	cell adhesion mediated by integrin	13/554	72/18722	1.66187e-07	7.88277e-06	5.45464e-06	CCL21/ITGB4/LIF/EPHA2/CCN3/COL16A1/CD3E/CCL5/ICAM1/SFRP2/CYP1B1/NPNT/CXCL13	13
BP	GO:0034614	cellular response to reactive oxygen species	19/554	155/18722	1.69079e-07	7.95729e-06	5.50619e-06	SOD3/FBLN5/AQP1/ANXA1/IL6/MET/KLF2/JUN/AKR1C3/KLF4/EGFR/CD36/ETS1/LCN2/FOS/TNFAIP3/SPHK1/MMP2/CYP1B1	19
BP	GO:0050727	regulation of inflammatory response	32/554	386/18722	1.70853e-07	7.97842e-06	5.52082e-06	SAA1/IL33/CX3CL1/FABP4/FNDC4/ADIPOQ/C3/SOCS3/ANXA1/TNFRSF1B/ZFP36/IL6/CCN3/LPL/GSTP1/KLF4/EGFR/ETS1/CCL5/MMP3/TNFAIP3/CST7/SPHK1/CCR7/CEBPB/PLA2G2A/BIRC3/APOE/PYCARD/S100A9/S100A8/ESR1	32
BP	GO:0001819	positive regulation of cytokine production	36/554	467/18722	1.76935e-07	8.19888e-06	5.67337e-06	SAA1/IL33/CX3CL1/CCL19/LEP/SERPINF2/ADIPOQ/C3/CHI3L1/IL17B/ANXA1/IL27RA/IL6/F3/LPL/IL4R/EGR1/RAB7B/IGHD/KIT/LTB/IFI16/CYBA/CD36/CD3E/SPON2/SPHK1/CCR7/VTCN1/CEBPB/CD2/WNT11/CD74/PYCARD/CYP1B1/PYDC1	36
BP	GO:0071559	response to transforming growth factor beta	25/554	256/18722	1.85687e-07	8.48483e-06	5.87124e-06	SFRP1/CAV2/CLDN5/CAV1/FNDC4/CIDEA/ID1/LTBP4/CDKN1C/SPRY2/ZFP36L2/EDN1/LTBP2/SPRY1/RUNX3/JUN/FOLR1/CLEC3B/TGFBR2/FOS/EMILIN1/CLDN1/FMOD/CILP/NPNT	25
BP	GO:0071384	cellular response to corticosteroid stimulus	12/554	61/18722	1.85923e-07	8.48483e-06	5.87124e-06	AQP1/ZFP36L2/ANXA1/EDN1/FAM107A/ZFP36/GSTP1/AKR1C3/EGFR/ICAM1/FBXO32/ASS1	12
BP	GO:0032355	response to estradiol	18/554	141/18722	1.92189e-07	8.63989e-06	5.97854e-06	SFRP1/CRYAB/PTN/LEP/GGT5/ANXA1/GSTP1/CCN2/EGFR/ETS1/OXTR/TXNIP/DUSP1/ASS1/RAMP3/FOXA1/AREG/ESR1	18
BP	GO:0034341	response to interferon-gamma	18/554	141/18722	1.92189e-07	8.63989e-06	5.97854e-06	CCL14/CCL21/CX3CL1/CCL19/EDN1/RAB7B/VIM/CCL17/CCL5/SOCS1/CCL22/GBP2/ICAM1/ASS1/CCL2/CD74/CLDN1/UBD	18
BP	GO:0050851	antigen receptor-mediated signaling pathway	24/554	240/18722	2.1035e-07	9.38627e-06	6.49501e-06	IGHA2/IGHA1/CD79B/BTNL9/IGHD/IGKC/IGLC2/IGLC3/TRBC2/LGALS3/PRNP/CD79A/CD3E/IGHM/LCK/IGLL5/CCR7/VTCN1/IGHG2/KCNN4/IGLC7/IGHG1/IGHG3/IGHG4	24
BP	GO:0071622	regulation of granulocyte chemotaxis	11/554	51/18722	2.24638e-07	9.95013e-06	6.88518e-06	IL34/CCL21/CCL19/EDN1/RAC2/CCL5/CCR7/RARRES2/CD74/THBS4/S100A7	11
BP	GO:0032612	interleukin-1 production	17/554	128/18722	2.35639e-07	1.02862e-05	7.11771e-06	SAA1/CX3CL1/CCL19/GAS6/ANXA1/IL6/LPL/GSTP1/EGR1/IGHD/IFI16/CD36/TNFAIP3/SPHK1/CCR7/PYCARD/PYDC1	17
BP	GO:0032652	regulation of interleukin-1 production	17/554	128/18722	2.35639e-07	1.02862e-05	7.11771e-06	SAA1/CX3CL1/CCL19/GAS6/ANXA1/IL6/LPL/GSTP1/EGR1/IGHD/IFI16/CD36/TNFAIP3/SPHK1/CCR7/PYCARD/PYDC1	17
BP	GO:0048511	rhythmic process	27/554	298/18722	2.76714e-07	1.19629e-05	8.27793e-06	NGFR/PTN/LEP/MMP7/ID1/ADIPOQ/PTGDS/ADAMTS1/ID4/EGR1/CAVIN3/BHLHE41/RELB/EGR2/PTX3/PER1/JUN/ID3/TIMP4/EGFR/ETS1/OXTR/EGR3/NTRK2/TOP2A/ASS1/ESR1	27
BP	GO:0071222	cellular response to lipopolysaccharide	22/554	209/18722	2.78021e-07	1.19629e-05	8.27793e-06	CX3CL1/CXCL2/TNFRSF1B/ZFP36/IL6/CTSG/GSTP1/LTF/VIM/CD36/LCN2/CCL5/SPON2/TNFAIP3/CXCL1/CEBPB/ICAM1/ASS1/CCL2/PYCARD/CXCL9/CXCL13	22
BP	GO:0050731	positive regulation of peptidyl-tyrosine phosphorylation	21/554	193/18722	2.97239e-07	1.2699e-05	8.78735e-06	IL34/LEP/ENPP2/ADIPOQ/GAS6/LIF/IL6/KIT/PECAM1/HCLS1/PRNP/CD36/NEDD9/CD3E/CCL5/ICAM1/CRLF1/CD74/THBS4/IGF2/AREG	21
BP	GO:0032970	regulation of actin filament-based process	32/554	396/18722	3.04124e-07	1.29017e-05	8.92759e-06	SFRP1/GSN/CCL21/CX3CL1/CAV1/ID1/SERPINF2/SYNPO/S1PR1/LMOD1/EDN1/CNN2/FAM107A/CDC42EP5/MET/GMFG/ELN/HCLS1/RAC2/CORO1A/CCN2/RND3/TACSTD2/CDC42EP1/FSCN1/COTL1/CCR7/ICAM1/CXCL12/WNT11/ARHGAP40/PYCARD	32
BP	GO:0032956	regulation of actin cytoskeleton organization	30/554	357/18722	3.11538e-07	1.31238e-05	9.08128e-06	SFRP1/GSN/CCL21/CX3CL1/ID1/SERPINF2/SYNPO/S1PR1/LMOD1/EDN1/FAM107A/CDC42EP5/MET/GMFG/ELN/HCLS1/RAC2/CORO1A/CCN2/RND3/TACSTD2/CDC42EP1/FSCN1/COTL1/CCR7/ICAM1/CXCL12/WNT11/ARHGAP40/PYCARD	30
BP	GO:0001655	urogenital system development	29/554	338/18722	3.18226e-07	1.33125e-05	9.21181e-06	SFRP1/TP63/RBP4/IRX1/SOX17/OSR1/ADIPOQ/SERPINB5/ANXA1/ADAMTS1/FGF2/LIF/EGR1/SPRY1/PECAM1/ID3/ACTA2/MME/TACSTD2/FOXC1/WNT11/CRLF1/ASS1/TNC/PROM1/VANGL2/FOXA1/NPNT/ESR1	29
BP	GO:0070542	response to fatty acid	12/554	64/18722	3.2331e-07	1.34319e-05	9.29443e-06	ADIPOQ/EDN1/LPL/ID3/AKR1C3/CCN2/CD36/PDK4/ASS1/DGAT2/SCD/CLDN1	12
BP	GO:0050853	B cell receptor signaling pathway	17/554	131/18722	3.30557e-07	1.36389e-05	9.43767e-06	IGHA2/IGHA1/CD79B/IGHD/IGKC/IGLC2/IGLC3/TRBC2/CD79A/IGHM/LCK/IGLL5/IGHG2/IGLC7/IGHG1/IGHG3/IGHG4	17
BP	GO:0007162	negative regulation of cell adhesion	27/554	303/18722	3.85671e-07	1.57761e-05	1.09166e-05	VSIR/CCL21/CX3CL1/ADIPOQ/ANXA1/C1QTNF1/FAM107A/IL4R/RUNX3/CCL28/KLF4/LGALS3/PRNP/TACSTD2/SOCS1/FZD7/APOD/FXYD5/DUSP1/VTCN1/CEBPB/FBLN1/CXCL12/ASS1/CD74/TNC/CYP1B1	27
BP	GO:0033622	integrin activation	8/554	25/18722	3.87594e-07	1.57761e-05	1.09166e-05	CX3CL1/SELP/RASIP1/COL16A1/FBLIM1/CXCL12/MZB1/CXCL13	8
BP	GO:0071346	cellular response to interferon-gamma	16/554	118/18722	3.99362e-07	1.6146e-05	1.11726e-05	CCL14/CCL21/CX3CL1/CCL19/EDN1/RAB7B/VIM/CCL17/CCL5/SOCS1/CCL22/GBP2/ICAM1/ASS1/CCL2/CLDN1	16
BP	GO:0008544	epidermis development	28/554	324/18722	4.39472e-07	1.75422e-05	1.21387e-05	KRT17/KRT14/KRT5/COL17A1/NGFR/LAMB3/TP63/KLK5/ANXA1/LAMC2/ZFP36/EPHA2/KLK7/KRT15/CDH3/KRT16/SOX18/AKR1C3/KLF4/CCN2/EGFR/FOXC1/TXNIP/SFN/SOSTDC1/FST/CALML5/S100A7	28
BP	GO:0032640	tumor necrosis factor production	20/554	181/18722	4.43444e-07	1.75422e-05	1.21387e-05	IL33/VSIR/CX3CL1/CCL19/LEP/CIDEA/ADIPOQ/GAS6/IL27RA/ZFP36/IL6/LPL/GSTP1/LTF/CYBA/CD36/SPON2/TNFAIP3/CD2/PYCARD	20
BP	GO:0032680	regulation of tumor necrosis factor production	20/554	181/18722	4.43444e-07	1.75422e-05	1.21387e-05	IL33/VSIR/CX3CL1/CCL19/LEP/CIDEA/ADIPOQ/GAS6/IL27RA/ZFP36/IL6/LPL/GSTP1/LTF/CYBA/CD36/SPON2/TNFAIP3/CD2/PYCARD	20
BP	GO:2000669	negative regulation of dendritic cell apoptotic process	5/554	7/18722	4.45544e-07	1.75422e-05	1.21387e-05	CCL21/CCL19/GAS6/CCR7/CXCL12	5
BP	GO:0045600	positive regulation of fat cell differentiation	12/554	66/18722	4.59227e-07	1.78476e-05	1.235e-05	SFRP1/ZFP36/LPL/CCDC3/PIM1/MEDAG/KLF5/CEBPB/RARRES2/WIF1/FRZB/SFRP2	12
BP	GO:0072678	T cell migration	12/554	66/18722	4.59227e-07	1.78476e-05	1.235e-05	CCL21/S1PR1/IL27RA/CCL5/APOD/GPR183/ICAM1/CXCL12/CCL2/PYCARD/CXCL13/S100A7	12
BP	GO:0061138	morphogenesis of a branching epithelium	20/554	182/18722	4.84704e-07	1.8717e-05	1.29516e-05	SFRP1/TP63/SPRY2/RASIP1/SOCS3/EDN1/FGF2/EPHA2/MET/SPRY1/HOXA5/TGFBR2/TACSTD2/TNC/SFRP2/FOXA1/AREG/NTN4/NPNT/ESR1	20
BP	GO:0009612	response to mechanical stimulus	22/554	216/18722	4.91954e-07	1.8876e-05	1.30616e-05	GSN/PTN/MMP7/AQP1/CHI3L1/EDN1/CNN2/KIT/JUN/FOSB/EGFR/TGFBR2/CYBA/ETS1/FOS/TXNIP/CXCL12/WNT11/TNC/CNTNAP2/BTG2/COL11A1	22
BP	GO:0002764	immune response-regulating signaling pathway	35/554	468/18722	5.38252e-07	2.05217e-05	1.42004e-05	IGHA2/IGHA1/CAV1/CD79B/BTNL9/LTF/RAB7B/NOP53/IGHD/KIT/IGKC/IGLC2/IGLC3/TRBC2/LGALS3/PRNP/CYBA/CD79A/PIGR/CD36/CD3E/IGHM/TNFAIP3/LCK/IGLL5/CCR7/VTCN1/BIRC3/IGHG2/KCNN4/IGLC7/IGHG1/IGHG3/ESR1/IGHG4	35
BP	GO:2000116	regulation of cysteine-type endopeptidase activity	23/554	235/18722	5.51676e-07	2.09012e-05	1.4463e-05	NGFR/TP63/GSN/CRYAB/AQP1/GAS6/CCN1/F3/LTF/KLF4/IFI16/CCN2/CD27/NR4A1/LCK/CST7/BIRC3/SFN/LAMP3/PYCARD/SFRP2/S100A9/S100A8	23
BP	GO:1903706	regulation of hemopoiesis	30/554	367/18722	5.60806e-07	2.11143e-05	1.46105e-05	SFRP1/VSIR/IL34/CCL19/PTN/ADIPOQ/GAS6/ZFP36L2/ANXA1/LIF/ZFP36/TCF7/IL4R/LTF/RAB7B/RUNX3/HOXA5/JUN/HCLS1/TGFBR2/IL7R/ETS1/CD27/FOS/SOCS1/EGR3/CEBPB/CD2/CD74/H4C8	30
BP	GO:0050871	positive regulation of B cell activation	18/554	152/18722	5.98826e-07	2.24057e-05	1.55041e-05	IGHA2/IGHA1/IL6/IGHD/IGKC/IGLC2/IGLC3/TRBC2/CD27/IGHM/GPR183/IGLL5/IGHG2/CD74/IGLC7/IGHG1/IGHG3/IGHG4	18
BP	GO:0071385	cellular response to glucocorticoid stimulus	11/554	56/18722	6.14306e-07	2.28431e-05	1.58067e-05	AQP1/ZFP36L2/ANXA1/EDN1/FAM107A/ZFP36/GSTP1/EGFR/ICAM1/FBXO32/ASS1	11
BP	GO:0071706	tumor necrosis factor superfamily cytokine production	20/554	186/18722	6.87287e-07	2.51843e-05	1.74268e-05	IL33/VSIR/CX3CL1/CCL19/LEP/CIDEA/ADIPOQ/GAS6/IL27RA/ZFP36/IL6/LPL/GSTP1/LTF/CYBA/CD36/SPON2/TNFAIP3/CD2/PYCARD	20
BP	GO:1903555	regulation of tumor necrosis factor superfamily cytokine production	20/554	186/18722	6.87287e-07	2.51843e-05	1.74268e-05	IL33/VSIR/CX3CL1/CCL19/LEP/CIDEA/ADIPOQ/GAS6/IL27RA/ZFP36/IL6/LPL/GSTP1/LTF/CYBA/CD36/SPON2/TNFAIP3/CD2/PYCARD	20
BP	GO:2000106	regulation of leukocyte apoptotic process	13/554	81/18722	6.89809e-07	2.51843e-05	1.74268e-05	CCL21/CCL19/GAS6/ANXA1/HCLS1/LGALS3/IL7R/CD27/CCL5/CCR7/CXCL12/CD74/PIP	13
BP	GO:0071219	cellular response to molecule of bacterial origin	22/554	221/18722	7.27975e-07	2.64176e-05	1.82802e-05	CX3CL1/CXCL2/TNFRSF1B/ZFP36/IL6/CTSG/GSTP1/LTF/VIM/CD36/LCN2/CCL5/SPON2/TNFAIP3/CXCL1/CEBPB/ICAM1/ASS1/CCL2/PYCARD/CXCL9/CXCL13	22
BP	GO:0061756	leukocyte adhesion to vascular endothelial cell	11/554	57/18722	7.411e-07	2.67329e-05	1.84983e-05	CCL21/SELP/LEP/JAM2/IL6/CCL28/KLF4/ETS1/ICAM1/CXCL12/SELL	11
BP	GO:0003401	axis elongation	8/554	27/18722	7.55067e-07	2.69143e-05	1.86239e-05	SFRP1/SPRY2/SPRY1/WNT11/TNC/SFRP2/AREG/ESR1	8
BP	GO:0071624	positive regulation of granulocyte chemotaxis	8/554	27/18722	7.55067e-07	2.69143e-05	1.86239e-05	CCL21/CCL19/EDN1/RAC2/CCR7/CD74/THBS4/S100A7	8
BP	GO:0045598	regulation of fat cell differentiation	17/554	139/18722	7.76709e-07	2.75229e-05	1.9045e-05	SFRP1/LEP/ADIPOQ/ZFP36L2/ZFP36/IL6/LPL/CCDC3/PIM1/LGALS12/MEDAG/KLF5/CEBPB/RARRES2/WIF1/FRZB/SFRP2	17
BP	GO:0110053	regulation of actin filament organization	25/554	277/18722	8.21421e-07	2.89371e-05	2.00236e-05	SFRP1/GSN/CCL21/CX3CL1/ID1/SERPINF2/SYNPO/S1PR1/LMOD1/CDC42EP5/MET/GMFG/ELN/HCLS1/CORO1A/CCN2/TACSTD2/CDC42EP1/COTL1/CCR7/ICAM1/CXCL12/WNT11/ARHGAP40/PYCARD	25
BP	GO:0048732	gland development	33/554	436/18722	8.74176e-07	3.04707e-05	2.10848e-05	SFRP1/TP63/LIMS2/CAV1/PTN/SERPINB5/ANXA1/FGF2/IL6/EPHA2/MET/CDO1/HOXA5/EGFR/TGFBR2/ETS1/FOXC1/OXTR/TNFAIP3/CEBPB/SOSTDC1/WNT11/ASS1/FRZB/TNC/CLDN1/NFIB/PRLR/IGF2/FOXA1/AREG/NTN4/ESR1	33
BP	GO:0007178	transmembrane receptor protein serine/threonine kinase signaling pathway	29/554	355/18722	8.77922e-07	3.04707e-05	2.10848e-05	SFRP1/CAV2/CHRDL1/CLDN5/CAV1/CIDEA/ID1/LTBP4/CDKN1C/SPRY2/CCN1/CCN3/EGR1/LTBP2/SPRY1/VIM/RGMA/JUN/FOLR1/TGFBR2/TF/FOS/EMILIN1/SOSTDC1/FST/SFRP2/FMOD/CILP/NPNT	29
BP	GO:0048863	stem cell differentiation	21/554	206/18722	8.80131e-07	3.04707e-05	2.10848e-05	SFRP1/TP63/MEOX1/SOX17/PTN/OSR1/ZFP36L2/EDN1/A2M/FGF2/LIF/EDN3/KIT/SOX18/SEMA3G/FOLR1/TACSTD2/FOXC1/FRZB/FOXA1/ESR1	21
BP	GO:0045123	cellular extravasation	12/554	70/18722	8.91186e-07	3.06772e-05	2.12276e-05	CCL21/CX3CL1/SELP/LEP/JAM2/IL27RA/PECAM1/CCL28/ICAM1/CXCL12/CCL2/SELL	12
BP	GO:0035296	regulation of tube diameter	17/554	141/18722	9.51832e-07	3.22509e-05	2.23166e-05	KCNMB1/SOD3/NPR1/CAV1/LEP/SERPINF2/EDN1/KLF2/EDN3/RGS2/ACTA2/EGFR/FOXC1/OXTR/SCPEP1/ICAM1/APOE	17
BP	GO:0097746	blood vessel diameter maintenance	17/554	141/18722	9.51832e-07	3.22509e-05	2.23166e-05	KCNMB1/SOD3/NPR1/CAV1/LEP/SERPINF2/EDN1/KLF2/EDN3/RGS2/ACTA2/EGFR/FOXC1/OXTR/SCPEP1/ICAM1/APOE	17
BP	GO:0050679	positive regulation of epithelial cell proliferation	21/554	207/18722	9.52965e-07	3.22509e-05	2.23166e-05	SFRP1/TP63/CAV2/PTN/OSR1/ID1/FGF2/F3/CDH3/EGFL7/EGFR/CYBA/NR4A1/FZD7/TNFAIP3/EGR3/CXCL12/CLDN1/THBS4/IGF2/AREG	21
BP	GO:0051017	actin filament bundle assembly	18/554	157/18722	9.68221e-07	3.25841e-05	2.25472e-05	SFRP1/CX3CL1/ID1/SERPINF2/SYNPO/S1PR1/FAM107A/MET/SORBS1/ELN/CCN2/TACSTD2/NEDD9/FSCN1/FAM171A1/WNT11/SHROOM1/PDLIM1	18
BP	GO:0007584	response to nutrient	19/554	174/18722	1.02961e-06	3.43224e-05	2.37501e-05	SFRP1/PTN/LEP/ADIPOQ/GAS6/ALPL/LPL/GSTP1/CCL28/FOLR1/AKR1C3/EGFR/TGFBR2/PIM1/CD3E/ASS1/FOLR2/TNC/SFRP2	19
BP	GO:0002573	myeloid leukocyte differentiation	21/554	208/18722	1.03127e-06	3.43224e-05	2.37501e-05	SFRP1/IL34/CCL19/ADIPOQ/JUNB/LIF/EPHA2/RELB/LTF/KIT/JUN/HCLS1/IFI16/TGFBR2/TF/FOS/GPR183/CCR7/CEBPB/CD74/UBD	21
BP	GO:0035150	regulation of tube size	17/554	142/18722	1.05216e-06	3.48253e-05	2.4098e-05	KCNMB1/SOD3/NPR1/CAV1/LEP/SERPINF2/EDN1/KLF2/EDN3/RGS2/ACTA2/EGFR/FOXC1/OXTR/SCPEP1/ICAM1/APOE	17
BP	GO:1901653	cellular response to peptide	29/554	359/18722	1.10276e-06	3.63007e-05	2.5119e-05	NGFR/CAV2/CAV1/TRARG1/LEP/ID1/ADIPOQ/SOCS3/EDN1/LPL/GSTP1/SORBS1/KLF2/VIM/KLF4/PRNP/CYBA/CD36/LCN2/PDK4/NR4A1/SOCS1/KLF5/ICAM1/RARRES2/CDC6/ASS1/IGF2/MZB1	29
BP	GO:0071216	cellular response to biotic stimulus	23/554	246/18722	1.22883e-06	4.0231e-05	2.78386e-05	CX3CL1/CXCL2/TNFRSF1B/ZFP36/IL6/CTSG/GSTP1/LTF/VIM/CD36/LCN2/CCL5/SPON2/TXNIP/TNFAIP3/CXCL1/CEBPB/ICAM1/ASS1/CCL2/PYCARD/CXCL9/CXCL13	23
BP	GO:0001649	osteoblast differentiation	22/554	229/18722	1.32832e-06	4.32531e-05	2.99298e-05	SFRP1/TP63/TWIST2/ALPL/JUNB/CCN1/FGF2/PDLIM7/IL6/EPHA2/LTF/ID3/TNN/TMEM119/CEBPB/MRC2/WNT11/TNC/SFRP2/IGF2/AREG/NPNT	22
BP	GO:0030324	lung development	19/554	177/18722	1.33607e-06	4.32714e-05	2.99424e-05	RBP4/PTN/CHI3L1/SPRY2/FGF2/LIF/HSD11B1/KLF2/SPRY1/HOXA5/MME/CCN2/EGFR/TGFBR2/WNT11/CRISPLD2/TNC/NFIB/FOXA1	19
BP	GO:2000117	negative regulation of cysteine-type endopeptidase activity	13/554	86/18722	1.39738e-06	4.48971e-05	3.10674e-05	CRYAB/AQP1/GAS6/LTF/KLF4/IFI16/CD27/NR4A1/CST7/BIRC3/SFN/LAMP3/SFRP2	13
BP	GO:0061572	actin filament bundle organization	18/554	161/18722	1.40117e-06	4.48971e-05	3.10674e-05	SFRP1/CX3CL1/ID1/SERPINF2/SYNPO/S1PR1/FAM107A/MET/SORBS1/ELN/CCN2/TACSTD2/NEDD9/FSCN1/FAM171A1/WNT11/SHROOM1/PDLIM1	18
BP	GO:0030199	collagen fibril organization	11/554	61/18722	1.50888e-06	4.80676e-05	3.32613e-05	SERPINF2/TNXB/COL14A1/DPT/FOXC1/LOXL4/EMILIN1/SFRP2/FMOD/COL11A1/CYP1B1	11
BP	GO:0060562	epithelial tube morphogenesis	27/554	325/18722	1.51608e-06	4.80676e-05	3.32613e-05	SFRP1/IRX1/SOX17/OSR1/SPRY2/RASIP1/EDN1/FGF2/EPHA2/MET/SPRY1/SOX18/HOXA5/RGMA/FOLR1/TGFBR2/TACSTD2/LCN2/SOSTDC1/WNT11/TNC/VANGL2/SFRP2/FOXA1/AREG/NPNT/ESR1	27
BP	GO:0042542	response to hydrogen peroxide	17/554	146/18722	1.55634e-06	4.90858e-05	3.39659e-05	CRYAB/AQP1/ANXA1/IL6/MET/KLF2/JUN/KLF4/ETS1/LCN2/TXNIP/TNFAIP3/SPHK1/DUSP1/HBB/CYP1B1/AREG	17
BP	GO:0001763	morphogenesis of a branching structure	20/554	196/18722	1.57462e-06	4.94036e-05	3.41858e-05	SFRP1/TP63/SPRY2/RASIP1/SOCS3/EDN1/FGF2/EPHA2/MET/SPRY1/HOXA5/TGFBR2/TACSTD2/TNC/SFRP2/FOXA1/AREG/NTN4/NPNT/ESR1	20
BP	GO:0071560	cellular response to transforming growth factor beta stimulus	23/554	250/18722	1.62341e-06	5.06707e-05	3.50625e-05	SFRP1/CAV2/CLDN5/CAV1/CIDEA/ID1/LTBP4/CDKN1C/SPRY2/ZFP36L2/EDN1/LTBP2/SPRY1/JUN/FOLR1/CLEC3B/TGFBR2/FOS/EMILIN1/CLDN1/FMOD/CILP/NPNT	23
BP	GO:0030323	respiratory tube development	19/554	181/18722	1.87335e-06	5.81705e-05	4.02522e-05	RBP4/PTN/CHI3L1/SPRY2/FGF2/LIF/HSD11B1/KLF2/SPRY1/HOXA5/MME/CCN2/EGFR/TGFBR2/WNT11/CRISPLD2/TNC/NFIB/FOXA1	19
BP	GO:0007596	blood coagulation	21/554	217/18722	2.05033e-06	6.33395e-05	4.38289e-05	SAA1/SELP/CAV1/PROS1/SERPINF2/GAS6/EDN1/MMRN1/C1QTNF1/IL6/MYL9/SERPING1/F3/VWF/F2RL2/CD36/LCK/FBLN1/HBB/APOE/TFPI2	21
BP	GO:0019216	regulation of lipid metabolic process	27/554	331/18722	2.14966e-06	6.6069e-05	4.57177e-05	CCL21/CCL19/CAV1/LEP/CIDEA/ADIPOQ/PLPP1/C3/ANXA1/CCN1/FGF2/EGR1/SORBS1/KIT/CES1/CCDC3/AKR1C3/LGALS12/PDK4/APOD/SPHK1/CCR7/RARRES2/CD74/DGAT2/APOE/EEF1A2	27
BP	GO:0032963	collagen metabolic process	14/554	104/18722	2.30975e-06	7.06291e-05	4.88731e-05	VSIR/MMP7/SERPINF2/MFAP4/TNXB/IL6/CYGB/VIM/KLK6/CCN2/MMP3/EMILIN1/MRC2/MMP2	14
BP	GO:0043434	response to peptide hormone	31/554	414/18722	2.35001e-06	7.14973e-05	4.94739e-05	CAV2/CAV1/TRARG1/LEP/ADIPOQ/SOCS3/ANXA1/EDN1/LPL/GSTP1/EGR1/SORBS1/CDO1/EGR2/TIMP4/CCN2/CYBA/PDK4/NR4A1/OXTR/SOCS1/ICAM1/RARRES2/CXCL12/CDC6/ASS1/BTG2/IGF2/MZB1/AREG/TFF1	31
BP	GO:1903034	regulation of response to wounding	18/554	167/18722	2.38372e-06	7.21584e-05	4.99314e-05	CAV1/PROS1/PTN/SERPINF2/ANXA1/EDN1/C1QTNF1/FGF2/SERPING1/F3/MYLK/RGMA/KLF4/CD36/TNFAIP3/KLK8/CLDN1/APOE	18
BP	GO:0002579	positive regulation of antigen processing and presentation	5/554	9/18722	2.54439e-06	7.66371e-05	5.30305e-05	CCL21/CCL19/CCR7/CD74/PYCARD	5
BP	GO:0071774	response to fibroblast growth factor	15/554	120/18722	2.61619e-06	7.80195e-05	5.39871e-05	NGFR/SFRP1/SPRY2/ZFP36L2/FGF2/ZFP36/IER2/SPRY1/CCN2/CCL5/NR4A1/EGR3/CCL2/TNC/CXCL13	15
BP	GO:0071901	negative regulation of protein serine/threonine kinase activity	15/554	120/18722	2.61619e-06	7.80195e-05	5.39871e-05	SFRP1/CAV1/ADIPOQ/CDKN1C/SPRY2/RASIP1/GSTP1/SPRY1/RGS2/TNFAIP3/DUSP1/APOE/PYCARD/SFRP2/PPP1R1B	15
BP	GO:0002768	immune response-regulating cell surface receptor signaling pathway	26/554	315/18722	2.66759e-06	7.91604e-05	5.47765e-05	IGHA2/IGHA1/CD79B/BTNL9/IGHD/KIT/IGKC/IGLC2/IGLC3/TRBC2/LGALS3/PRNP/CD79A/PIGR/CD3E/IGHM/LCK/IGLL5/CCR7/VTCN1/IGHG2/KCNN4/IGLC7/IGHG1/IGHG3/IGHG4	26
BP	GO:0060541	respiratory system development	20/554	203/18722	2.71743e-06	8.02442e-05	5.55265e-05	RBP4/PTN/CHI3L1/SPRY2/FGF2/LIF/HSD11B1/KLF2/SPRY1/HOXA5/MME/CCN2/EGFR/TGFBR2/WNT11/CRISPLD2/ASS1/TNC/NFIB/FOXA1	20
BP	GO:0071887	leukocyte apoptotic process	14/554	106/18722	2.9088e-06	8.54763e-05	5.91469e-05	CCL21/CCL19/GAS6/ANXA1/IL6/HCLS1/LGALS3/IL7R/CD27/CCL5/CCR7/CXCL12/CD74/PIP	14
BP	GO:0007599	hemostasis	21/554	222/18722	2.95175e-06	8.59002e-05	5.94403e-05	SAA1/SELP/CAV1/PROS1/SERPINF2/GAS6/EDN1/MMRN1/C1QTNF1/IL6/MYL9/SERPING1/F3/VWF/F2RL2/CD36/LCK/FBLN1/HBB/APOE/TFPI2	21
BP	GO:0050817	coagulation	21/554	222/18722	2.95175e-06	8.59002e-05	5.94403e-05	SAA1/SELP/CAV1/PROS1/SERPINF2/GAS6/EDN1/MMRN1/C1QTNF1/IL6/MYL9/SERPING1/F3/VWF/F2RL2/CD36/LCK/FBLN1/HBB/APOE/TFPI2	21
BP	GO:0043542	endothelial cell migration	24/554	279/18722	3.16504e-06	9.12257e-05	6.31254e-05	PTN/ID1/ANXA1/EDN1/RHOJ/FGF2/S100A2/MMRN2/EPHA2/CCN3/MET/ANXA3/CLEC14A/MEOX2/SOX18/KLF4/LGALS12/ETS1/LCN2/NR4A1/EGR3/APOE/CYP1B1/CXCL13	24
BP	GO:1902105	regulation of leukocyte differentiation	24/554	279/18722	3.16504e-06	9.12257e-05	6.31254e-05	SFRP1/VSIR/IL34/CCL19/ADIPOQ/GAS6/ZFP36L2/ANXA1/LIF/TCF7/IL4R/LTF/RUNX3/JUN/HCLS1/TGFBR2/IL7R/CD27/FOS/SOCS1/EGR3/CEBPB/CD2/CD74	24
BP	GO:0008360	regulation of cell shape	17/554	154/18722	3.26479e-06	9.3653e-05	6.48049e-05	S100B/ITGA7/PTN/ANXA1/RHOJ/PALMD/CDC42EP5/KIT/PRAG1/RAC2/FBLIM1/CORO1A/RND3/CDC42EP1/FAM171A1/ICAM1/CCL2	17
BP	GO:0071900	regulation of protein serine/threonine kinase activity	28/554	359/18722	3.33606e-06	9.48079e-05	6.56041e-05	SFRP1/IL34/CCL19/CAV1/ADIPOQ/TNXB/CDKN1C/SPRY2/RASIP1/EDN1/FGF2/GSTP1/LTF/EDN3/KIT/SPRY1/RGS2/EGFR/TNFAIP3/DIRAS3/DUSP1/SFN/CDC6/APOE/PYCARD/SFRP2/IGF2/PPP1R1B	28
BP	GO:0042129	regulation of T cell proliferation	18/554	171/18722	3.34822e-06	9.48079e-05	6.56041e-05	VSIR/CCL19/LEP/ANXA1/IL27RA/TNFRSF1B/IL6/RAC2/CORO1A/LGALS3/PRNP/TGFBR2/CD3E/CCL5/VTCN1/CEBPB/PYCARD/IGF2	18
BP	GO:0001895	retina homeostasis	12/554	79/18722	3.36801e-06	9.48079e-05	6.56041e-05	IGHA2/IGHA1/JCHAIN/CDH3/LTF/IGKC/PIGR/TF/OPRPN/PROM1/IGHG3/PIP	12
BP	GO:0061844	antimicrobial humoral immune response mediated by antimicrobial peptide	12/554	79/18722	3.36801e-06	9.48079e-05	6.56041e-05	CXCL2/KLK5/KLK7/LTF/DEFB1/CXCL1/KRT6A/S100A9/CXCL14/CXCL9/CXCL13/S100A7	12
BP	GO:0071496	cellular response to external stimulus	26/554	320/18722	3.56051e-06	9.97605e-05	6.90312e-05	SFRP1/PTN/LEP/MMP7/AQP1/GAS6/CNN2/FAM107A/LPL/GSTP1/JUN/FOLR1/AKR1C3/IFI16/EGFR/PIM1/CYBA/LCN2/PDK4/FOS/ATF3/ICAM1/WNT11/FOLR2/TNC/SFRP2	26
BP	GO:0050670	regulation of lymphocyte proliferation	21/554	225/18722	3.65244e-06	0.000101862	7.04856e-05	VSIR/CCL19/LEP/ANXA1/IL27RA/TNFRSF1B/IL6/RAC2/CORO1A/LGALS3/PRNP/TGFBR2/CD3E/CCL5/GPR183/VTCN1/CEBPB/CD74/PYCARD/IGF2/MZB1	21
BP	GO:1902903	regulation of supramolecular fiber organization	29/554	382/18722	3.80326e-06	0.00010558	7.30581e-05	SFRP1/GSN/CCL21/CRYAB/CX3CL1/ID1/SERPINF2/SYNPO/S1PR1/LMOD1/EDN1/CDC42EP5/MET/GMFG/ELN/HCLS1/CORO1A/CCN2/TACSTD2/CDC42EP1/COTL1/EMILIN1/CCR7/ICAM1/CXCL12/WNT11/ARHGAP40/APOE/PYCARD	29
BP	GO:0060537	muscle tissue development	30/554	403/18722	3.84536e-06	0.000106259	7.35279e-05	CAV2/S100B/MYH11/RBP4/CAV1/OSR1/S1PR1/EDN1/FGF2/PI16/MYLK/EGR1/ELN/MEOX2/RCAN1/EGR2/YBX3/RGS2/TGFBR2/PIM1/FOS/NR4A1/FOXC1/FZD7/KLF5/ATF3/BTG2/IGF2/COL11A1/ZBTB18	30
BP	GO:0051495	positive regulation of cytoskeleton organization	21/554	226/18722	3.9176e-06	0.000107761	7.45671e-05	SFRP1/GSN/CCL21/CX3CL1/ID1/SERPINF2/SYNPO/LMOD1/EDN1/CDC42EP5/MET/GMFG/HCLS1/CORO1A/CCN2/CDC42EP1/CCR7/ICAM1/NES/WNT11/PYCARD	21
BP	GO:0071295	cellular response to vitamin	8/554	33/18722	4.03753e-06	0.000110555	7.65005e-05	SFRP1/PTN/LEP/GAS6/FOLR1/PIM1/FOLR2/TNC	8
BP	GO:0032944	regulation of mononuclear cell proliferation	21/554	227/18722	4.20012e-06	0.000113857	7.87852e-05	VSIR/CCL19/LEP/ANXA1/IL27RA/TNFRSF1B/IL6/RAC2/CORO1A/LGALS3/PRNP/TGFBR2/CD3E/CCL5/GPR183/VTCN1/CEBPB/CD74/PYCARD/IGF2/MZB1	21
BP	GO:0043281	regulation of cysteine-type endopeptidase activity involved in apoptotic process	20/554	209/18722	4.2482e-06	0.000113857	7.87852e-05	NGFR/TP63/GSN/CRYAB/AQP1/GAS6/CCN1/F3/KLF4/CCN2/CD27/NR4A1/LCK/BIRC3/SFN/LAMP3/PYCARD/SFRP2/S100A9/S100A8	20
BP	GO:1902905	positive regulation of supramolecular fiber organization	20/554	209/18722	4.2482e-06	0.000113857	7.87852e-05	SFRP1/GSN/CCL21/CX3CL1/ID1/SERPINF2/SYNPO/LMOD1/EDN1/CDC42EP5/MET/GMFG/CORO1A/CCN2/CDC42EP1/CCR7/ICAM1/WNT11/APOE/PYCARD	20
BP	GO:1902107	positive regulation of leukocyte differentiation	17/554	157/18722	4.25261e-06	0.000113857	7.87852e-05	VSIR/IL34/CCL19/GAS6/ANXA1/LIF/IL4R/RUNX3/JUN/HCLS1/TGFBR2/IL7R/CD27/FOS/SOCS1/EGR3/CD74	17
BP	GO:1903708	positive regulation of hemopoiesis	17/554	157/18722	4.25261e-06	0.000113857	7.87852e-05	VSIR/IL34/CCL19/GAS6/ANXA1/LIF/IL4R/RUNX3/JUN/HCLS1/TGFBR2/IL7R/CD27/FOS/SOCS1/EGR3/CD74	17
BP	GO:0090023	positive regulation of neutrophil chemotaxis	7/554	24/18722	4.27154e-06	0.000113857	7.87858e-05	CCL21/CCL19/EDN1/RAC2/CCR7/CD74/THBS4	7
BP	GO:0006874	cellular calcium ion homeostasis	32/554	448/18722	4.37141e-06	0.000116006	8.02726e-05	SAA1/CCL14/CAV2/CCL21/CX3CL1/CCL19/CAV1/S1PR1/EDN1/C1QTNF1/FGF2/S1PR4/EDN3/CCL28/NMB/CORO1A/PRNP/CD52/CYBA/F2RL2/CD36/CCL5/OXTR/LCK/CCR7/CXCL12/CALB2/RAMP3/APOE/ESR1/CXCL9/CXCL13	32
BP	GO:0010959	regulation of metal ion transport	30/554	406/18722	4.45918e-06	0.000117816	8.15251e-05	KCNMB1/CX3CL1/CAV1/SCN4B/OSR1/KCNIP2/STAC2/GEM/MYLK/FHL1/RRAD/EDN3/PER1/CORO1A/LGALS3/PRNP/CYBA/TF/LCN2/CCL5/GRAMD2A/FXYD5/ICAM1/CXCL12/CCL2/KCNN4/S100A1/RAMP3/NKAIN1/CXCL9	30
BP	GO:0003014	renal system process	14/554	110/18722	4.53649e-06	0.000119335	8.25764e-05	GSN/IGHA2/NPR1/IGHA1/AQP1/SERPINF2/ADIPOQ/JCHAIN/GAS6/EDN1/SGK1/AKR1C3/CYBA/HBB	14
BP	GO:0042698	ovulation cycle	11/554	68/18722	4.58868e-06	0.000120184	8.31633e-05	PTN/LEP/MMP7/ADAMTS1/EGR1/PTX3/TIMP4/EGFR/ETS1/OXTR/ESR1	11
BP	GO:0048251	elastic fiber assembly	5/554	10/18722	4.96474e-06	0.00012947	8.95892e-05	MYH11/FBLN5/MFAP4/TNXB/EMILIN1	5
BP	GO:0051235	maintenance of location	26/554	326/18722	4.98946e-06	0.000129554	8.96474e-05	GSN/CCL21/CX3CL1/CCL19/CAV1/LEP/CIDEA/C3/FGF2/IL6/LPL/CES1/CORO1A/CYBA/CD36/LCN2/LCK/CCR7/SRGN/DGAT2/MDFI/APOE/S100A9/S100A8/CXCL9/S100A7	26
BP	GO:0003012	muscle system process	32/554	452/18722	5.25604e-06	0.00013589	9.40318e-05	GSN/CNN1/MYH11/CRYAB/HSPB6/SYNM/CAV1/LEP/SCN4B/KCNIP2/STAC2/LMOD1/EDN1/TPM2/TNFRSF1B/MYL9/PI16/MYLK/EDN3/KIT/RGS2/ACTA2/KLF4/CCN2/TNNI2/CYBA/NR4A1/OXTR/SPHK1/FBXO32/NPNT/KCNJ3	32
BP	GO:0043405	regulation of MAP kinase activity	18/554	177/18722	5.46183e-06	0.000140607	9.72957e-05	SFRP1/IL34/CCL19/CAV1/ADIPOQ/TNXB/SPRY2/EDN1/FGF2/GSTP1/EDN3/KIT/SPRY1/RGS2/EGFR/DUSP1/APOE/SFRP2	18
BP	GO:0031670	cellular response to nutrient	9/554	45/18722	5.58301e-06	0.000143115	9.90313e-05	SFRP1/PTN/LEP/GAS6/LPL/FOLR1/PIM1/FOLR2/TNC	9
BP	GO:0070293	renal absorption	6/554	17/18722	6.1229e-06	0.00015629	0.000108148	GSN/ADIPOQ/GAS6/SGK1/AKR1C3/HBB	6
BP	GO:0032642	regulation of chemokine production	13/554	98/18722	6.24199e-06	0.000158657	0.000109786	ACKR1/IL33/ADIPOQ/IL6/EPHA2/LPL/GSTP1/IL4R/EGR1/KLF4/APOD/CD74/PYCARD	13
BP	GO:0007160	cell-matrix adhesion	21/554	233/18722	6.31993e-06	0.000159963	0.00011069	COL17A1/SFRP1/CCL21/CX3CL1/ITGA7/FBLN5/TNXB/ITGB4/FAM107A/COL16A1/SORBS1/CCL28/TNN/CCN2/CD36/CD3E/APOD/EMILIN1/CCR7/NPNT/MSLN	21
BP	GO:0061448	connective tissue development	22/554	252/18722	6.39529e-06	0.000161194	0.000111541	LEP/OSR1/CHI3L1/EDN1/CCN1/FGF2/CCN3/EGR1/RUNX3/HOXA5/ACTA2/CCN2/TGFBR2/WNT11/DGAT2/FRZB/MGP/NFIB/EFEMP1/SFRP2/COL11A1/FOXA1	22
BP	GO:0002429	immune response-activating cell surface receptor signaling pathway	24/554	291/18722	6.52648e-06	0.000163135	0.000112884	IGHA2/IGHA1/CD79B/BTNL9/IGHD/IGKC/IGLC2/IGLC3/TRBC2/LGALS3/PRNP/CD79A/CD3E/IGHM/LCK/IGLL5/CCR7/VTCN1/IGHG2/KCNN4/IGLC7/IGHG1/IGHG3/IGHG4	24
BP	GO:0002757	immune response-activating signal transduction	24/554	291/18722	6.52648e-06	0.000163135	0.000112884	IGHA2/IGHA1/CD79B/BTNL9/IGHD/IGKC/IGLC2/IGLC3/TRBC2/LGALS3/PRNP/CD79A/CD3E/IGHM/LCK/IGLL5/CCR7/VTCN1/IGHG2/KCNN4/IGLC7/IGHG1/IGHG3/IGHG4	24
BP	GO:0032602	chemokine production	13/554	99/18722	6.99448e-06	0.000174111	0.000120479	ACKR1/IL33/ADIPOQ/IL6/EPHA2/LPL/GSTP1/IL4R/EGR1/KLF4/APOD/CD74/PYCARD	13
BP	GO:0051480	regulation of cytosolic calcium ion concentration	27/554	353/18722	7.14235e-06	0.00017706	0.00012252	SAA1/CAV2/CCL21/CX3CL1/CCL19/CAV1/S1PR1/EDN1/C1QTNF1/FGF2/S1PR4/CCL28/NMB/CORO1A/PRNP/CD52/CYBA/F2RL2/CD36/OXTR/LCK/CCR7/CALB2/RAMP3/ESR1/CXCL9/CXCL13	27
BP	GO:0055074	calcium ion homeostasis	32/554	460/18722	7.53796e-06	0.000186101	0.000128776	SAA1/CCL14/CAV2/CCL21/CX3CL1/CCL19/CAV1/S1PR1/EDN1/C1QTNF1/FGF2/S1PR4/EDN3/CCL28/NMB/CORO1A/PRNP/CD52/CYBA/F2RL2/CD36/CCL5/OXTR/LCK/CCR7/CXCL12/CALB2/RAMP3/APOE/ESR1/CXCL9/CXCL13	32
BP	GO:0043407	negative regulation of MAP kinase activity	10/554	59/18722	8.09037e-06	0.000198924	0.000137649	SFRP1/CAV1/ADIPOQ/SPRY2/GSTP1/SPRY1/RGS2/DUSP1/APOE/SFRP2	10
BP	GO:0045667	regulation of osteoblast differentiation	15/554	132/18722	8.60179e-06	0.000210639	0.000145756	SFRP1/TP63/TWIST2/CCN1/FGF2/PDLIM7/IL6/LTF/ID3/TNN/TMEM119/CEBPB/SFRP2/AREG/NPNT	15
BP	GO:0097048	dendritic cell apoptotic process	5/554	11/18722	8.88029e-06	0.000215705	0.000149261	CCL21/CCL19/GAS6/CCR7/CXCL12	5
BP	GO:2000668	regulation of dendritic cell apoptotic process	5/554	11/18722	8.88029e-06	0.000215705	0.000149261	CCL21/CCL19/GAS6/CCR7/CXCL12	5
BP	GO:0060538	skeletal muscle organ development	17/554	166/18722	9.0272e-06	0.000218393	0.000151121	CAV2/S100B/CAV1/EGR1/ELN/MEOX2/RCAN1/EGR2/YBX3/FOS/NR4A1/KLF5/ATF3/ASS1/BTG2/IGF2/ZBTB18	17
BP	GO:0072593	reactive oxygen species metabolic process	21/554	239/18722	9.36623e-06	0.000225689	0.000156169	SOD3/CRYAB/GPX3/FBLN5/LEP/EDN1/CCN1/GSTP1/AKR1C3/RAC2/CCN2/EGFR/TGFBR2/CYBA/CD36/LCN2/PDK4/MMP3/HBB/MAOB/CYP1B1	21
BP	GO:0002686	negative regulation of leukocyte migration	9/554	48/18722	9.764e-06	0.000234336	0.000162153	CCL21/IL27RA/CCN3/CCL28/APOD/EMILIN1/DUSP1/CXCL12/CCL2	9
BP	GO:0007369	gastrulation	18/554	185/18722	1.01251e-05	0.000242038	0.000167483	LAMB3/SFRP1/ITGA7/SOX17/OSR1/ADIPOQ/ETS2/ITGB4/EPHA2/KLF4/TGFBR2/FOXC1/FZD7/DUSP1/WNT11/MMP2/SFRP2/COL11A1	18
BP	GO:0033674	positive regulation of kinase activity	32/554	467/18722	1.02465e-05	0.000243035	0.000168173	IL34/CCL21/CCL19/LEP/ADIPOQ/GAS6/CHI3L1/SPRY2/EDN1/CCN1/FGF2/EPHA2/MET/EGR1/LTF/EDN3/KIT/PRNP/EGFR/TGFBR2/NEDD9/CCL5/SOCS1/CCR7/NTRK2/WNT11/CDC6/CD74/PRLR/IGF2/AREG/EEF1A2	32
BP	GO:0007204	positive regulation of cytosolic calcium ion concentration	25/554	319/18722	1.02475e-05	0.000243035	0.000168173	SAA1/CCL21/CX3CL1/CCL19/CAV1/S1PR1/EDN1/C1QTNF1/FGF2/S1PR4/CCL28/NMB/CORO1A/PRNP/CD52/CYBA/F2RL2/CD36/OXTR/LCK/CCR7/RAMP3/ESR1/CXCL9/CXCL13	25
BP	GO:0048754	branching morphogenesis of an epithelial tube	16/554	151/18722	1.07025e-05	0.00025283	0.00017495	SPRY2/RASIP1/EDN1/FGF2/EPHA2/MET/SPRY1/HOXA5/TGFBR2/TACSTD2/TNC/SFRP2/FOXA1/AREG/NPNT/ESR1	16
BP	GO:0071383	cellular response to steroid hormone stimulus	19/554	204/18722	1.08602e-05	0.000255555	0.000176836	SFRP1/TP63/AQP1/PLPP1/ZFP36L2/ANXA1/EDN1/FAM107A/ZFP36/GSTP1/PER1/AKR1C3/EGFR/ICAM1/FBXO32/ASS1/FOXA1/SCGB2A2/ESR1	19
BP	GO:2000401	regulation of lymphocyte migration	10/554	61/18722	1.10123e-05	0.000258125	0.000178615	CCL21/JAM2/IL27RA/CCL5/APOD/CXCL12/CCL2/PYCARD/CXCL13/S100A7	10
BP	GO:0001101	response to acid chemical	15/554	135/18722	1.13225e-05	0.000264367	0.000182933	PTN/EDN1/COL16A1/GSTP1/CDO1/KLF2/COL18A1/CCN2/CYBA/SOCS1/NTRK2/CEBPB/ICAM1/ASS1/MMP2	15
BP	GO:0098754	detoxification	16/554	152/18722	1.16408e-05	0.00027075	0.000187351	SOD3/GPX3/FBLN5/MT1M/MT1X/CYGB/GSTP1/PIM1/CD36/ALDH1A1/HBB/APOE/MT1E/GSTA1/S100A9/AKR7A3	16
BP	GO:0014706	striated muscle tissue development	28/554	384/18722	1.18531e-05	0.000274626	0.000190033	CAV2/S100B/MYH11/RBP4/CAV1/S1PR1/EDN1/FGF2/PI16/EGR1/ELN/MEOX2/RCAN1/EGR2/YBX3/RGS2/TGFBR2/PIM1/FOS/NR4A1/FOXC1/FZD7/KLF5/ATF3/BTG2/IGF2/COL11A1/ZBTB18	28
BP	GO:0036293	response to decreased oxygen levels	25/554	322/18722	1.20339e-05	0.000277747	0.000192192	SFRP1/KCNMB1/S100B/SOD3/CRYAB/CAV1/PTN/LEP/AQP1/ADIPOQ/EDN1/CYGB/EGR1/NOP53/ANGPTL4/CCN2/TGFBR2/CYBA/ETS1/LCN2/OXTR/ICAM1/CXCL12/PDLIM1/MMP2	25
BP	GO:0048661	positive regulation of smooth muscle cell proliferation	13/554	104/18722	1.20887e-05	0.000277947	0.000192331	CX3CL1/SERPINF2/S1PR1/ADAMTS1/EDN1/FGF2/IL6/JUN/EGFR/TGFBR2/CYBA/CCL5/MMP2	13
BP	GO:0071398	cellular response to fatty acid	8/554	38/18722	1.2484e-05	0.000285945	0.000197865	EDN1/LPL/ID3/AKR1C3/PDK4/ASS1/DGAT2/CLDN1	8
BP	GO:0043588	skin development	22/554	263/18722	1.26058e-05	0.00028764	0.000199038	KRT17/NGFR/TP63/ITGB4/KLK5/ANXA1/ZFP36/EPHA2/MET/CDH3/KRT16/SOX18/LTB/AKR1C3/EGFR/FOXC1/TXNIP/SFN/SOSTDC1/FST/CLDN1/S100A7	22
BP	GO:1902624	positive regulation of neutrophil migration	7/554	28/18722	1.31846e-05	0.000299712	0.000207392	CCL21/CCL19/EDN1/RAC2/CCR7/CD74/THBS4	7
BP	GO:0046849	bone remodeling	12/554	90/18722	1.34099e-05	0.000303688	0.000210143	SFRP1/PTN/LEP/S1PR1/IL6/EPHA2/RAC2/EGFR/TF/TMEM119/PDK4/TNFAIP3	12
BP	GO:0031667	response to nutrient levels	32/554	474/18722	1.38216e-05	0.000311839	0.000215783	SFRP1/PTN/LEP/MMP7/ADIPOQ/GAS6/ALPL/FAM107A/ZFP36/LPL/GSTP1/CCL28/JUN/FOLR1/AKR1C3/IFI16/EGFR/TGFBR2/PIM1/CYBA/LCN2/CD3E/PDK4/ATF3/ICAM1/RARRES2/WNT11/ASS1/FOLR2/TNC/APOE/SFRP2	32
BP	GO:0001704	formation of primary germ layer	14/554	121/18722	1.38837e-05	0.000312073	0.000215944	LAMB3/ITGA7/SOX17/ETS2/ITGB4/EPHA2/KLF4/FOXC1/FZD7/DUSP1/WNT11/MMP2/SFRP2/COL11A1	14
BP	GO:0051216	cartilage development	18/554	190/18722	1.46113e-05	0.000327207	0.000226417	LEP/OSR1/CHI3L1/EDN1/CCN1/FGF2/CCN3/RUNX3/HOXA5/CCN2/TGFBR2/WNT11/FRZB/MGP/NFIB/EFEMP1/SFRP2/COL11A1	18
BP	GO:0022617	extracellular matrix disassembly	10/554	63/18722	1.48017e-05	0.000330243	0.000228518	MMP7/KLK5/IL6/CTSG/KLK7/ETS1/MMP3/FSCN1/MMP2/TPSAB1	10
BP	GO:0007519	skeletal muscle tissue development	16/554	155/18722	1.49109e-05	0.000331452	0.000229355	CAV2/S100B/CAV1/EGR1/ELN/MEOX2/RCAN1/EGR2/YBX3/FOS/NR4A1/KLF5/ATF3/BTG2/IGF2/ZBTB18	16
BP	GO:0006936	muscle contraction	26/554	347/18722	1.51146e-05	0.000334745	0.000231633	GSN/CNN1/MYH11/CRYAB/HSPB6/SYNM/CAV1/SCN4B/KCNIP2/STAC2/LMOD1/EDN1/TPM2/MYL9/MYLK/EDN3/KIT/RGS2/ACTA2/CCN2/TNNI2/NR4A1/OXTR/SPHK1/NPNT/KCNJ3	26
BP	GO:0046850	regulation of bone remodeling	9/554	51/18722	1.63686e-05	0.000361188	0.000249931	SFRP1/LEP/S1PR1/IL6/EGFR/TF/TMEM119/PDK4/TNFAIP3	9
BP	GO:0046651	lymphocyte proliferation	23/554	288/18722	1.70479e-05	0.000374804	0.000259353	VSIR/CCL19/LEP/ANXA1/IL27RA/TNFRSF1B/IL6/RAC2/CORO1A/LGALS3/PRNP/TGFBR2/CD79A/IL7R/CD3E/CCL5/GPR183/VTCN1/CEBPB/CD74/PYCARD/IGF2/MZB1	23
BP	GO:0070373	negative regulation of ERK1 and ERK2 cascade	11/554	78/18722	1.783e-05	0.000390574	0.000270265	ADIPOQ/SPRY2/NDRG2/LIF/GSTP1/SPRY1/KLF4/ATF3/EMILIN1/DUSP1/FBLN1	11
BP	GO:0048771	tissue remodeling	17/554	175/18722	1.8133e-05	0.000395772	0.000273862	SFRP1/CAV1/PTN/LEP/S1PR1/LIF/IL6/EPHA2/RAC2/EGFR/TF/TMEM119/PDK4/FOXC1/TNFAIP3/THBS4/MMP2	17
BP	GO:0045429	positive regulation of nitric oxide biosynthetic process	8/554	40/18722	1.86363e-05	0.000403831	0.000279439	EDN1/KLF2/PTX3/KLF4/CD36/ICAM1/ASS1/HBB	8
BP	GO:1904994	regulation of leukocyte adhesion to vascular endothelial cell	8/554	40/18722	1.86363e-05	0.000403831	0.000279439	CCL21/SELP/IL6/CCL28/KLF4/ETS1/ICAM1/CXCL12	8
BP	GO:1903038	negative regulation of leukocyte cell-cell adhesion	15/554	141/18722	1.91456e-05	0.000413381	0.000286047	VSIR/CCL21/ANXA1/IL4R/RUNX3/CCL28/KLF4/LGALS3/PRNP/SOCS1/VTCN1/CEBPB/CXCL12/ASS1/CD74	15
BP	GO:0016049	cell growth	32/554	482/18722	1.92819e-05	0.000414835	0.000287053	KRT17/SFRP1/CRYAB/NPR1/FBLN5/SOX17/LTBP4/EDN1/FAM107A/CCN3/PI16/NDN/FHL1/SGK1/SEMA3G/RGMA/RGS2/TNN/NRN1/EGFR/TGFBR2/CYBA/SPHK1/CXCL12/SFN/WNT11/SCGB3A1/FRZB/APOE/SFRP2/S100A9/S100A8	32
BP	GO:0071677	positive regulation of mononuclear cell migration	10/554	65/18722	1.96626e-05	0.000421521	0.000291679	CCL21/GAS6/JAM2/LGALS3/CCL5/CCR7/CXCL12/PYCARD/CXCL13/S100A7	10
BP	GO:0032943	mononuclear cell proliferation	23/554	291/18722	2.01163e-05	0.000429719	0.000297352	VSIR/CCL19/LEP/ANXA1/IL27RA/TNFRSF1B/IL6/RAC2/CORO1A/LGALS3/PRNP/TGFBR2/CD79A/IL7R/CD3E/CCL5/GPR183/VTCN1/CEBPB/CD74/PYCARD/IGF2/MZB1	23
BP	GO:0009410	response to xenobiotic stimulus	31/554	462/18722	2.11736e-05	0.000450705	0.000311874	SFRP1/FMO2/PTN/ADIPOQ/GAS6/NNMT/ANXA1/EDN1/LPL/GSTP1/CDH3/JUN/COL18A1/FOSB/TIMP4/PRNP/EGFR/TGFBR2/CYBA/LCN2/FOS/OXTR/APOD/TXNIP/LCK/ICAM1/ASS1/MAOB/SFRP2/CYP1B1/GSTA1	31
BP	GO:0034694	response to prostaglandin	7/554	30/18722	2.15339e-05	0.000456762	0.000316065	SFRP1/CCL21/CCL19/EDN1/AKR1C3/CCR7/TNC	7
BP	GO:0022408	negative regulation of cell-cell adhesion	18/554	196/18722	2.22867e-05	0.000467953	0.000323809	VSIR/CCL21/ADIPOQ/ANXA1/C1QTNF1/IL4R/RUNX3/CCL28/KLF4/LGALS3/PRNP/SOCS1/FXYD5/VTCN1/CEBPB/CXCL12/ASS1/CD74	18
BP	GO:0032611	interleukin-1 beta production	13/554	110/18722	2.22946e-05	0.000467953	0.000323809	CX3CL1/CCL19/IL6/LPL/GSTP1/EGR1/IFI16/CD36/TNFAIP3/SPHK1/CCR7/PYCARD/PYDC1	13
BP	GO:0032651	regulation of interleukin-1 beta production	13/554	110/18722	2.22946e-05	0.000467953	0.000323809	CX3CL1/CCL19/IL6/LPL/GSTP1/EGR1/IFI16/CD36/TNFAIP3/SPHK1/CCR7/PYCARD/PYDC1	13
BP	GO:1904407	positive regulation of nitric oxide metabolic process	8/554	41/18722	2.25597e-05	0.000471873	0.000326521	EDN1/KLF2/PTX3/KLF4/CD36/ICAM1/ASS1/HBB	8
BP	GO:0032102	negative regulation of response to external stimulus	29/554	420/18722	2.30813e-05	0.000481114	0.000332916	SAA1/CX3CL1/PROS1/LEP/FNDC4/SERPINF2/ADIPOQ/SOCS3/EDN1/C1QTNF1/A2M/FGF2/TNFRSF1B/ZFP36/SERPING1/CCN3/GSTP1/LTF/SEMA3G/RGMA/KLF4/IFI16/TNFAIP3/CST7/DUSP1/KLK8/CCL2/APOE/CXCL13	29
BP	GO:0050764	regulation of phagocytosis	12/554	95/18722	2.34049e-05	0.000484153	0.000335019	ADIPOQ/GAS6/C3/CNN2/MFGE8/PTX3/CYBA/CD36/SPHK1/IL2RG/CCL2/PYCARD	12
BP	GO:0031272	regulation of pseudopodium assembly	5/554	13/18722	2.35486e-05	0.000484153	0.000335019	CCL21/CDC42EP5/KIT/CDC42EP1/CCR7	5
BP	GO:0031274	positive regulation of pseudopodium assembly	5/554	13/18722	2.35486e-05	0.000484153	0.000335019	CCL21/CDC42EP5/KIT/CDC42EP1/CCR7	5
BP	GO:0042659	regulation of cell fate specification	5/554	13/18722	2.35486e-05	0.000484153	0.000335019	SOX17/FGF2/FZD7/WNT11/SFRP2	5
BP	GO:0071248	cellular response to metal ion	18/554	197/18722	2.38679e-05	0.000489048	0.000338406	MT1M/MT1X/FABP4/AQP1/EDN1/JUNB/SYT8/CPNE3/JUN/AKR1C3/FOSB/PRNP/EGFR/TF/FOS/CLDN1/MT1E/SYT13	18
BP	GO:0033630	positive regulation of cell adhesion mediated by integrin	6/554	21/18722	2.42671e-05	0.000495542	0.000342899	CCL21/LIF/CD3E/CCL5/SFRP2/CXCL13	6
BP	GO:0106106	cold-induced thermogenesis	15/554	144/18722	2.46129e-05	0.000499219	0.000345444	G0S2/CAV1/LEP/FABP4/CIDEA/ID1/ADIPOQ/IL4R/CD36/LCN2/OXTR/CEBPB/ALDH1A1/SCD/PRLR	15
BP	GO:0120161	regulation of cold-induced thermogenesis	15/554	144/18722	2.46129e-05	0.000499219	0.000345444	G0S2/CAV1/LEP/FABP4/CIDEA/ID1/ADIPOQ/IL4R/CD36/LCN2/OXTR/CEBPB/ALDH1A1/SCD/PRLR	15
BP	GO:0002606	positive regulation of dendritic cell antigen processing and presentation	4/554	7/18722	2.47264e-05	0.000499839	0.000345873	CCL21/CCL19/CCR7/CD74	4
BP	GO:0030185	nitric oxide transport	3/554	3/18722	2.57743e-05	0.00051412	0.000355755	AQP1/EDN1/HBB	3
BP	GO:0097017	renal protein absorption	3/554	3/18722	2.57743e-05	0.00051412	0.000355755	GSN/ADIPOQ/GAS6	3
BP	GO:0097026	dendritic cell dendrite assembly	3/554	3/18722	2.57743e-05	0.00051412	0.000355755	CCL21/CCL19/CCR7	3
BP	GO:2000547	regulation of dendritic cell dendrite assembly	3/554	3/18722	2.57743e-05	0.00051412	0.000355755	CCL21/CCL19/CCR7	3
BP	GO:0043409	negative regulation of MAPK cascade	17/554	180/18722	2.61423e-05	0.000519741	0.000359645	SFRP1/CAV1/ADIPOQ/SPRY2/NDRG2/LIF/GSTP1/SPRY1/PER1/RGS2/KLF4/ATF3/EMILIN1/DUSP1/FBLN1/APOE/SFRP2	17
BP	GO:1902893	regulation of pri-miRNA transcription by RNA polymerase II	9/554	54/18722	2.64436e-05	0.000524	0.000362592	NGFR/FGF2/EGR1/JUN/KLF4/ETS1/FOS/KLF5/NFIB	9
BP	GO:0002526	acute inflammatory response	13/554	112/18722	2.70717e-05	0.00053279	0.000368674	SAA1/SAA2/SERPINF2/C3/IL6/F3/GSTP1/LCN2/CCR7/CEBPB/ICAM1/ASS1/S100A8	13
BP	GO:1902895	positive regulation of pri-miRNA transcription by RNA polymerase II	8/554	42/18722	2.71525e-05	0.00053279	0.000368674	NGFR/FGF2/EGR1/JUN/KLF4/ETS1/FOS/KLF5	8
BP	GO:2000404	regulation of T cell migration	8/554	42/18722	2.71525e-05	0.00053279	0.000368674	CCL21/IL27RA/CCL5/APOD/CXCL12/PYCARD/CXCL13/S100A7	8
BP	GO:0042098	T cell proliferation	18/554	199/18722	2.73335e-05	0.0005346	0.000369926	VSIR/CCL19/LEP/ANXA1/IL27RA/TNFRSF1B/IL6/RAC2/CORO1A/LGALS3/PRNP/TGFBR2/CD3E/CCL5/VTCN1/CEBPB/PYCARD/IGF2	18
BP	GO:0048608	reproductive structure development	29/554	424/18722	2.74725e-05	0.000535581	0.000370605	SFRP1/TP63/RBP4/PTN/LEP/OSR1/SERPINB5/C3/SOCS3/ANXA1/ADAMTS1/JUNB/CCN1/LIF/PTX3/KIT/YBX3/AKR1C3/MME/FOXC1/CEBPB/ICAM1/FST/TNC/MDFI/SFRP2/IGF2/FOXA1/ESR1	29
BP	GO:0030099	myeloid cell differentiation	27/554	381/18722	2.8006e-05	0.000544221	0.000376584	SFRP1/IL34/CCL19/ADIPOQ/JUNB/LIF/ZFP36/EPHA2/RELB/LTF/RAB7B/KLF2/KIT/HOXA5/JUN/HCLS1/IFI16/TGFBR2/TF/ETS1/FOS/GPR183/CCR7/CEBPB/CD74/UBD/H4C8	27
BP	GO:0007568	aging	25/554	339/18722	2.86583e-05	0.000555104	0.000384115	KRT14/ECRG4/TP63/KCNMB1/CRYAB/CX3CL1/LEP/MMP7/EDN1/FGF2/TNFRSF1B/SERPING1/PRELP/KRT16/JUN/MME/PRNP/CCN2/TGFBR2/FOS/APOD/ICAM1/ASS1/C1QA/CLDN1	25
BP	GO:0006721	terpenoid metabolic process	12/554	97/18722	2.89329e-05	0.000556842	0.000385317	RBP4/ADH1B/LIPE/AKR1C3/EGFR/SCPEP1/ALDH1A1/RARRES2/DGAT2/CYP1B1/HMGCS2/RBP1	12
BP	GO:0120162	positive regulation of cold-induced thermogenesis	12/554	97/18722	2.89329e-05	0.000556842	0.000385317	G0S2/CAV1/LEP/FABP4/ADIPOQ/IL4R/CD36/LCN2/OXTR/CEBPB/SCD/PRLR	12
BP	GO:0044344	cellular response to fibroblast growth factor stimulus	13/554	113/18722	2.97793e-05	0.000571307	0.000395327	NGFR/SFRP1/SPRY2/ZFP36L2/FGF2/ZFP36/SPRY1/CCN2/CCL5/NR4A1/EGR3/CCL2/CXCL13	13
BP	GO:0061614	pri-miRNA transcription by RNA polymerase II	9/554	55/18722	3.07979e-05	0.000587974	0.000406859	NGFR/FGF2/EGR1/JUN/KLF4/ETS1/FOS/KLF5/NFIB	9
BP	GO:0051403	stress-activated MAPK cascade	20/554	239/18722	3.08432e-05	0.000587974	0.000406859	SFRP1/CCL21/CRYAB/CCL19/LEP/SERPINF2/CDC42EP5/ZFP36/IGFBP6/GSTP1/PER1/CCN2/EGFR/CD27/FZD7/SPHK1/CCR7/DUSP1/PYCARD/SFRP2	20
BP	GO:0061458	reproductive system development	29/554	427/18722	3.12493e-05	0.000593835	0.000410916	SFRP1/TP63/RBP4/PTN/LEP/OSR1/SERPINB5/C3/SOCS3/ANXA1/ADAMTS1/JUNB/CCN1/LIF/PTX3/KIT/YBX3/AKR1C3/MME/FOXC1/CEBPB/ICAM1/FST/TNC/MDFI/SFRP2/IGF2/FOXA1/ESR1	29
BP	GO:0032635	interleukin-6 production	16/554	165/18722	3.24932e-05	0.000613602	0.000424593	IL33/CX3CL1/LEP/GAS6/IL27RA/IL6/LPL/RAB7B/KLF2/CYBA/CD36/SPON2/TNFAIP3/CEBPB/CD74/PYCARD	16
BP	GO:0032675	regulation of interleukin-6 production	16/554	165/18722	3.24932e-05	0.000613602	0.000424593	IL33/CX3CL1/LEP/GAS6/IL27RA/IL6/LPL/RAB7B/KLF2/CYBA/CD36/SPON2/TNFAIP3/CEBPB/CD74/PYCARD	16
BP	GO:0045669	positive regulation of osteoblast differentiation	10/554	69/18722	3.35962e-05	0.000632448	0.000437634	TP63/CCN1/FGF2/PDLIM7/IL6/LTF/TMEM119/CEBPB/SFRP2/NPNT	10
BP	GO:0090022	regulation of neutrophil chemotaxis	7/554	32/18722	3.38214e-05	0.000634703	0.000439195	CCL21/CCL19/EDN1/RAC2/CCR7/CD74/THBS4	7
BP	GO:0042063	gliogenesis	23/554	301/18722	3.42782e-05	0.000641279	0.000443745	S100B/IL34/CX3CL1/PTN/ITGB4/ANXA1/FGF2/LIF/TNFRSF1B/IL6/NDN/GSTP1/EGR2/VIM/EGFR/GPR183/NTRK2/CCL2/C1QA/NFIB/AREG/S100A9/S100A8	23
BP	GO:0045860	positive regulation of protein kinase activity	27/554	386/18722	3.51378e-05	0.000655325	0.000453464	IL34/CCL21/CCL19/LEP/ADIPOQ/GAS6/CHI3L1/SPRY2/EDN1/CCN1/FGF2/EGR1/LTF/EDN3/KIT/PRNP/EGFR/TGFBR2/NEDD9/CCL5/SOCS1/CCR7/WNT11/CDC6/PRLR/IGF2/AREG	27
BP	GO:0072001	renal system development	23/554	302/18722	3.60994e-05	0.000671181	0.000464436	SFRP1/RBP4/IRX1/SOX17/OSR1/ADIPOQ/ADAMTS1/FGF2/LIF/EGR1/SPRY1/PECAM1/ID3/ACTA2/MME/TACSTD2/FOXC1/WNT11/CRLF1/ASS1/PROM1/VANGL2/NPNT	23
BP	GO:0045834	positive regulation of lipid metabolic process	15/554	149/18722	3.68225e-05	0.000682518	0.000472282	CCL21/CCL19/ADIPOQ/ANXA1/CCN1/FGF2/SORBS1/KIT/CES1/CCDC3/CCR7/CD74/DGAT2/APOE/EEF1A2	15
BP	GO:0002274	myeloid leukocyte activation	19/554	223/18722	3.78553e-05	0.000699511	0.00048404	IL33/CX3CL1/PTGDS/IL6/IL4R/ANXA3/RELB/KIT/RAC2/TGFBR2/CCL5/CST7/SPHK1/PLA2G2A/CD2/CD74/C1QA/PYCARD/UBD	19
BP	GO:0043200	response to amino acid	13/554	116/18722	3.93721e-05	0.000725314	0.000501895	PTN/EDN1/COL16A1/GSTP1/CDO1/CCN2/CYBA/SOCS1/NTRK2/CEBPB/ICAM1/ASS1/MMP2	13
BP	GO:0008217	regulation of blood pressure	17/554	186/18722	3.97927e-05	0.000729131	0.000504536	NPR1/LEP/SERPINF2/ADIPOQ/GAS6/EDN1/CTSG/SGK1/EDN3/ACTA2/MME/CYBA/OXTR/SCPEP1/RARRES2/HBB/ANPEP	17
BP	GO:0070665	positive regulation of leukocyte proliferation	15/554	150/18722	3.98214e-05	0.000729131	0.000504536	IL34/CCL19/LEP/ANXA1/IL27RA/IL6/CORO1A/TGFBR2/CD3E/CCL5/GPR183/VTCN1/CD74/PYCARD/IGF2	15
BP	GO:0050901	leukocyte tethering or rolling	7/554	33/18722	4.18401e-05	0.000763601	0.000528388	CCL21/SELP/LEP/JAM2/CCL28/CXCL12/SELL	7
BP	GO:0002683	negative regulation of immune system process	29/554	434/18722	4.19575e-05	0.000763601	0.000528388	SFRP1/VSIR/CCL21/CX3CL1/ADIPOQ/ANXA1/IL27RA/A2M/SERPING1/CCN3/IL4R/LTF/RUNX3/CCL28/IFI16/LGALS3/PRNP/IL7R/SOCS1/APOD/TNFAIP3/CST7/EMILIN1/DUSP1/VTCN1/CEBPB/CXCL12/CCL2/CD74	29
BP	GO:0070482	response to oxygen levels	25/554	347/18722	4.20984e-05	0.000763857	0.000528565	SFRP1/KCNMB1/S100B/SOD3/CRYAB/CAV1/PTN/LEP/AQP1/ADIPOQ/EDN1/CYGB/EGR1/NOP53/ANGPTL4/CCN2/TGFBR2/CYBA/ETS1/LCN2/OXTR/ICAM1/CXCL12/PDLIM1/MMP2	25
BP	GO:0042102	positive regulation of T cell proliferation	12/554	101/18722	4.34698e-05	0.000784018	0.000542516	CCL19/LEP/ANXA1/IL27RA/IL6/CORO1A/TGFBR2/CD3E/CCL5/VTCN1/PYCARD/IGF2	12
BP	GO:0050830	defense response to Gram-positive bacterium	12/554	101/18722	4.34698e-05	0.000784018	0.000542516	IL27RA/IL6/EPHA2/CTSG/DEFB1/CD36/IL7R/GBP2/PLA2G2A/RARRES2/KRT6A/PYCARD	12
BP	GO:0061041	regulation of wound healing	14/554	134/18722	4.41248e-05	0.000793457	0.000549048	CAV1/PROS1/SERPINF2/ANXA1/EDN1/C1QTNF1/FGF2/SERPING1/F3/MYLK/CD36/TNFAIP3/CLDN1/APOE	14
BP	GO:0071241	cellular response to inorganic substance	19/554	226/18722	4.54468e-05	0.000813638	0.000563012	MT1M/MT1X/FABP4/AQP1/EDN1/JUNB/SYT8/CPNE3/JUN/AKR1C3/FOSB/PRNP/EGFR/TF/MMP3/FOS/CLDN1/MT1E/SYT13	19
BP	GO:0007389	pattern specification process	29/554	436/18722	4.55749e-05	0.000813638	0.000563012	SFRP1/TP63/MEOX1/IRX1/SOX17/OSR1/ETS2/MFNG/C3/EDN1/FGF2/BHLHE41/MEOX2/EGR2/SPRY1/SOX18/HOXA5/FOLR1/TGFBR2/FOXC1/SOSTDC1/WNT11/FST/MDFI/VANGL2/C1QA/BTG2/SFRP2/FOXA1	29
BP	GO:0002920	regulation of humoral immune response	8/554	45/18722	4.58684e-05	0.000813638	0.000563012	C3/KLK5/A2M/SERPING1/KLK7/SPNS2/CCR7/CXCL13	8
BP	GO:0085029	extracellular matrix assembly	8/554	45/18722	4.58684e-05	0.000813638	0.000563012	LAMB3/MYH11/FBLN5/MFAP4/GAS6/TNXB/EMILIN1/NTN4	8
BP	GO:0001558	regulation of cell growth	28/554	414/18722	4.59224e-05	0.000813638	0.000563012	KRT17/SFRP1/CRYAB/NPR1/FBLN5/SOX17/LTBP4/EDN1/FAM107A/CCN3/PI16/FHL1/SGK1/SEMA3G/RGMA/RGS2/EGFR/CYBA/SPHK1/CXCL12/SFN/WNT11/SCGB3A1/FRZB/APOE/SFRP2/S100A9/S100A8	28
BP	GO:0031668	cellular response to extracellular stimulus	20/554	246/18722	4.64676e-05	0.000820883	0.000568025	SFRP1/PTN/LEP/GAS6/FAM107A/LPL/GSTP1/JUN/FOLR1/AKR1C3/IFI16/PIM1/LCN2/PDK4/FOS/ATF3/ICAM1/FOLR2/TNC/SFRP2	20
BP	GO:0030111	regulation of Wnt signaling pathway	24/554	328/18722	4.67176e-05	0.000822886	0.000569412	SFRP1/CAV1/SOX17/TRABD2B/TMEM88/PLEKHA4/FGF2/IGFBP6/EGR1/CDH3/FOLR1/TCF7L1/TNN/EGFR/FZD7/LGR6/TNFAIP3/WIF1/SOSTDC1/WNT11/FRZB/MDFI/APOE/SFRP2	24
BP	GO:0002692	negative regulation of cellular extravasation	4/554	8/18722	4.82938e-05	0.000848168	0.000586906	CCL21/IL27RA/CCL28/CXCL12	4
BP	GO:0031098	stress-activated protein kinase signaling cascade	20/554	247/18722	4.9198e-05	0.000861538	0.000596158	SFRP1/CCL21/CRYAB/CCL19/LEP/SERPINF2/CDC42EP5/ZFP36/IGFBP6/GSTP1/PER1/CCN2/EGFR/CD27/FZD7/SPHK1/CCR7/DUSP1/PYCARD/SFRP2	20
BP	GO:0016101	diterpenoid metabolic process	11/554	87/18722	5.05114e-05	0.000881973	0.000610298	RBP4/ADH1B/LIPE/AKR1C3/EGFR/SCPEP1/ALDH1A1/RARRES2/DGAT2/CYP1B1/RBP1	11
BP	GO:0022604	regulation of cell morphogenesis	23/554	309/18722	5.14784e-05	0.00089626	0.000620184	LIMS2/S100B/ITGA7/PTN/ENPP2/ANXA1/RHOJ/PALMD/CDC42EP5/KIT/PRAG1/RAC2/FBLIM1/CORO1A/RND3/TACSTD2/NEDD9/CDC42EP1/FAM171A1/OLFM4/ICAM1/FBLN1/CCL2	23
BP	GO:0072073	kidney epithelium development	14/554	136/18722	5.19979e-05	0.000902695	0.000624637	SFRP1/IRX1/OSR1/ADIPOQ/FGF2/LIF/SPRY1/PECAM1/TACSTD2/FOXC1/WNT11/CRLF1/PROM1/NPNT	14
BP	GO:0031269	pseudopodium assembly	5/554	15/18722	5.23087e-05	0.000905482	0.000626565	CCL21/CDC42EP5/KIT/CDC42EP1/CCR7	5
BP	GO:0051090	regulation of DNA-binding transcription factor activity	29/554	440/18722	5.3668e-05	0.000926349	0.000641005	CX3CL1/CAV1/ID1/GAS6/EDN1/IL6/NDN/ANXA3/SGK1/LTF/RAB7B/KIT/ID3/KLF4/HCLS1/PRNP/PIM1/CD36/TNFAIP3/SPHK1/ICAM1/MDFI/PYCARD/CYP1B1/FOXA1/S100A9/PYDC1/S100A8/ESR1	29
BP	GO:0030856	regulation of epithelial cell differentiation	15/554	154/18722	5.40747e-05	0.000930704	0.000644018	TP63/CLDN5/CAV1/OSR1/ID1/SPRY2/FGF2/LIF/ZFP36/SPRY1/FOXC1/CEBPB/SFN/FRZB/PROM1	15
BP	GO:0032732	positive regulation of interleukin-1 production	10/554	73/18722	5.52266e-05	0.000947821	0.000655862	SAA1/CCL19/IL6/LPL/EGR1/IGHD/IFI16/CD36/PYCARD/PYDC1	10
BP	GO:0007623	circadian rhythm	18/554	210/18722	5.56721e-05	0.000950053	0.000657407	NGFR/LEP/ID1/ADIPOQ/PTGDS/ID4/EGR1/CAVIN3/BHLHE41/RELB/PER1/JUN/ID3/EGFR/EGR3/NTRK2/TOP2A/ASS1	18
BP	GO:0050866	negative regulation of cell activation	18/554	210/18722	5.56721e-05	0.000950053	0.000657407	SFRP1/VSIR/CX3CL1/ANXA1/C1QTNF1/CYGB/IL4R/RUNX3/LGALS3/PRNP/SOCS1/TNFAIP3/CST7/EMILIN1/VTCN1/CEBPB/CD74/APOE	18
BP	GO:0045471	response to ethanol	14/554	137/18722	5.63756e-05	0.000953951	0.000660104	KCNMB1/RBP4/CLDN5/LEP/ADIPOQ/GSTP1/CDO1/RGS2/CD27/ICAM1/TNC/CLDN1/MAOB/S100A8	14
BP	GO:0050671	positive regulation of lymphocyte proliferation	14/554	137/18722	5.63756e-05	0.000953951	0.000660104	CCL19/LEP/ANXA1/IL27RA/IL6/CORO1A/TGFBR2/CD3E/CCL5/GPR183/VTCN1/CD74/PYCARD/IGF2	14
BP	GO:0055123	digestive system development	14/554	137/18722	5.63756e-05	0.000953951	0.000660104	SFRP1/TP63/SOX17/KIT/HOXA5/EGFR/TGFBR2/OXTR/KLF5/RARRES2/WNT11/ASS1/SFRP2/IGF2	14
BP	GO:0045621	positive regulation of lymphocyte differentiation	12/554	104/18722	5.81751e-05	0.000981643	0.000679267	VSIR/CCL19/GAS6/ANXA1/IL4R/RUNX3/TGFBR2/IL7R/CD27/SOCS1/EGR3/CD74	12
BP	GO:0032872	regulation of stress-activated MAPK cascade	17/554	192/18722	5.94142e-05	0.000999751	0.000691797	SFRP1/CCL21/CCL19/LEP/SERPINF2/IGFBP6/GSTP1/PER1/CCN2/EGFR/CD27/FZD7/SPHK1/CCR7/DUSP1/PYCARD/SFRP2	17
BP	GO:0032946	positive regulation of mononuclear cell proliferation	14/554	138/18722	6.10717e-05	0.00102478	0.000709116	CCL19/LEP/ANXA1/IL27RA/IL6/CORO1A/TGFBR2/CD3E/CCL5/GPR183/VTCN1/CD74/PYCARD/IGF2	14
BP	GO:0001659	temperature homeostasis	16/554	174/18722	6.19725e-05	0.00103413	0.000715589	G0S2/CAV1/LEP/FABP4/CIDEA/ID1/ADIPOQ/IL4R/EGR1/CD36/LCN2/OXTR/CEBPB/ALDH1A1/SCD/PRLR	16
BP	GO:0045619	regulation of lymphocyte differentiation	16/554	174/18722	6.19725e-05	0.00103413	0.000715589	SFRP1/VSIR/CCL19/GAS6/ZFP36L2/ANXA1/TCF7/IL4R/RUNX3/TGFBR2/IL7R/CD27/SOCS1/EGR3/CD2/CD74	16
BP	GO:2000403	positive regulation of lymphocyte migration	7/554	35/18722	6.25682e-05	0.00104119	0.000720472	CCL21/JAM2/CCL5/CXCL12/PYCARD/CXCL13/S100A7	7
BP	GO:0006469	negative regulation of protein kinase activity	18/554	212/18722	6.29849e-05	0.00104524	0.000723271	SFRP1/CAV1/FABP4/ADIPOQ/CDKN1C/SPRY2/RASIP1/GSTP1/SPRY1/RGS2/TNFAIP3/DUSP1/SFN/APOE/PYCARD/SFRP2/PYDC1/PPP1R1B	18
BP	GO:0007565	female pregnancy	17/554	193/18722	6.34059e-05	0.00104562	0.000723536	PTN/LEP/MMP7/ITGB4/JUNB/LIF/COL16A1/RGS2/FOSB/TGFBR2/ETS1/FOS/OXTR/FBLN1/PRLR/MMP2/ESR1	17
BP	GO:0010712	regulation of collagen metabolic process	8/554	47/18722	6.35287e-05	0.00104562	0.000723536	VSIR/SERPINF2/MFAP4/IL6/CYGB/VIM/CCN2/EMILIN1	8
BP	GO:0010803	regulation of tumor necrosis factor-mediated signaling pathway	8/554	47/18722	6.35287e-05	0.00104562	0.000723536	ADIPOQ/GAS6/GSTP1/CCDC3/TNFAIP3/SPHK1/PYCARD/PYDC1	8
BP	GO:0006816	calcium ion transport	28/554	422/18722	6.41114e-05	0.00105234	0.000728183	CCL21/CX3CL1/CCL19/CAV1/STAC2/GAS6/GEM/FGF2/CACHD1/MYLK/RRAD/TMEM37/CORO1A/LGALS3/PRNP/CCN2/CYBA/CCL5/GRAMD2A/LCK/CCR7/ICAM1/CXCL12/CCL2/KCNN4/S100A1/RAMP3/CXCL9	28
BP	GO:0001822	kidney development	22/554	293/18722	6.5543e-05	0.00107291	0.000742421	SFRP1/IRX1/SOX17/OSR1/ADIPOQ/ADAMTS1/FGF2/LIF/EGR1/SPRY1/PECAM1/ID3/ACTA2/MME/TACSTD2/FOXC1/WNT11/CRLF1/ASS1/PROM1/VANGL2/NPNT	22
BP	GO:1990845	adaptive thermogenesis	15/554	157/18722	6.75273e-05	0.0011024	0.000762824	G0S2/CAV1/LEP/FABP4/CIDEA/ID1/ADIPOQ/IL4R/CD36/LCN2/OXTR/CEBPB/ALDH1A1/SCD/PRLR	15
BP	GO:0048662	negative regulation of smooth muscle cell proliferation	10/554	75/18722	6.98868e-05	0.00113783	0.000787345	CNN1/NPR1/ADIPOQ/NDRG2/GSTP1/KLF4/APOD/TNFAIP3/OGN/APOE	10
BP	GO:0062197	cellular response to chemical stress	24/554	337/18722	7.15372e-05	0.00116156	0.000803766	SOD3/FBLN5/CAV1/AQP1/ANXA1/IL6/MYLK/MET/RELB/KLF2/YBX3/JUN/AKR1C3/KLF4/EGFR/CD36/ETS1/LCN2/MMP3/FOS/TNFAIP3/SPHK1/MMP2/CYP1B1	24
BP	GO:0070302	regulation of stress-activated protein kinase signaling cascade	17/554	195/18722	7.2105e-05	0.00116764	0.000807968	SFRP1/CCL21/CCL19/LEP/SERPINF2/IGFBP6/GSTP1/PER1/CCN2/EGFR/CD27/FZD7/SPHK1/CCR7/DUSP1/PYCARD/SFRP2	17
BP	GO:0031268	pseudopodium organization	5/554	16/18722	7.42384e-05	0.00119009	0.000823503	CCL21/CDC42EP5/KIT/CDC42EP1/CCR7	5
BP	GO:0044849	estrous cycle	5/554	16/18722	7.42384e-05	0.00119009	0.000823503	PTN/MMP7/EGR1/ETS1/OXTR	5
BP	GO:0033628	regulation of cell adhesion mediated by integrin	8/554	48/18722	7.42816e-05	0.00119009	0.000823503	CCL21/LIF/EPHA2/CD3E/CCL5/SFRP2/CYP1B1/CXCL13	8
BP	GO:0048146	positive regulation of fibroblast proliferation	8/554	48/18722	7.42816e-05	0.00119009	0.000823503	NGFR/AQP1/GAS6/SPHK1/CDC6/CD74/S100A6/ESR1	8
BP	GO:0043270	positive regulation of ion transport	21/554	275/18722	7.51119e-05	0.0012002	0.000830499	KCNMB1/CX3CL1/CAV1/LEP/SCN4B/KCNIP2/STAC2/EDN1/MYLK/FHL1/EDN3/LGALS3/LCN2/CCL5/CEBPB/CXCL12/CCL2/KCNN4/S100A1/RAMP3/CXCL9	21
BP	GO:0007611	learning or memory	20/554	255/18722	7.67203e-05	0.00121659	0.000841841	S100B/CLDN5/PTN/SGK1/RCAN1/EGR2/KIT/JUN/MME/PRNP/EGFR/FOS/OXTR/NTRK2/CEBPB/KLK8/CNTNAP2/APOE/BTG2/PPP1R1B	20
BP	GO:0045582	positive regulation of T cell differentiation	11/554	91/18722	7.67436e-05	0.00121659	0.000841841	VSIR/CCL19/ANXA1/IL4R/RUNX3/TGFBR2/IL7R/CD27/SOCS1/EGR3/CD74	11
BP	GO:0060191	regulation of lipase activity	11/554	91/18722	7.67436e-05	0.00121659	0.000841841	GPIHBP1/ANXA1/CCN1/FGF2/S1PR4/KIT/ANGPTL4/RGS2/EGFR/CCL5/ESR1	11
BP	GO:0006809	nitric oxide biosynthetic process	10/554	76/18722	7.83777e-05	0.00123543	0.000854879	CAV1/EDN1/KLF2/PTX3/KLF4/CD36/ICAM1/ASS1/HBB/CYP1B1	10
BP	GO:0031100	animal organ regeneration	10/554	76/18722	7.83777e-05	0.00123543	0.000854879	GAS6/NNMT/IL6/GSTP1/ANXA3/EGFR/TGFBR2/CEBPB/CXCL12/CLDN1	10
BP	GO:0043254	regulation of protein-containing complex assembly	28/554	427/18722	7.85474e-05	0.00123543	0.000854879	GSN/CCL21/CRYAB/SELP/TRABD2B/RASIP1/LMOD1/CDC42EP5/MET/GMFG/ELN/NOP53/HCLS1/FBLIM1/CORO1A/LGALS3/CD36/MMP3/CDC42EP1/FSCN1/COTL1/CCR7/ICAM1/ARHGAP40/APOE/PYCARD/ESR1/CXCL13	28
BP	GO:0045428	regulation of nitric oxide biosynthetic process	9/554	62/18722	8.17805e-05	0.00128293	0.000887749	CAV1/EDN1/KLF2/PTX3/KLF4/CD36/ICAM1/ASS1/HBB	9
BP	GO:0031334	positive regulation of protein-containing complex assembly	19/554	237/18722	8.61827e-05	0.00134848	0.000933106	GSN/CCL21/TRABD2B/RASIP1/LMOD1/CDC42EP5/MET/GMFG/CORO1A/LGALS3/CD36/MMP3/CDC42EP1/FSCN1/CCR7/ICAM1/PYCARD/ESR1/CXCL13	19
BP	GO:1904894	positive regulation of receptor signaling pathway via STAT	8/554	49/18722	8.65024e-05	0.00134997	0.000934141	LEP/IL6/KIT/IL7R/CCL5/SOCS1/PRLR/CYP1B1	8
BP	GO:0007179	transforming growth factor beta receptor signaling pathway	17/554	198/18722	8.71259e-05	0.00135619	0.000938443	CAV2/CLDN5/CAV1/CIDEA/ID1/LTBP4/CDKN1C/SPRY2/LTBP2/SPRY1/JUN/FOLR1/TGFBR2/FOS/EMILIN1/FMOD/NPNT	17
BP	GO:0002407	dendritic cell chemotaxis	6/554	26/18722	9.07739e-05	0.00140933	0.000975216	CCL21/CCL19/GAS6/CCL5/GPR183/CCR7	6
BP	GO:0001990	regulation of systemic arterial blood pressure by hormone	7/554	37/18722	9.10111e-05	0.00140939	0.000975251	SERPINF2/EDN1/CTSG/EDN3/MME/CYBA/OXTR	7
BP	GO:0033273	response to vitamin	11/554	93/18722	9.37408e-05	0.00144423	0.000999363	SFRP1/PTN/LEP/GAS6/ALPL/GSTP1/FOLR1/EGFR/PIM1/FOLR2/TNC	11
BP	GO:0051591	response to cAMP	11/554	93/18722	9.37408e-05	0.00144423	0.000999363	GPD1/AQP1/ADIPOQ/CDO1/PER1/JUN/FOSB/FOS/DUSP1/ASS1/AREG	11
BP	GO:0060759	regulation of response to cytokine stimulus	15/554	162/18722	9.65076e-05	0.00148307	0.00102624	CAV1/ADIPOQ/GAS6/EDN1/IL6/GSTP1/CCDC3/KLF4/CCL5/SOCS1/TNFAIP3/SPHK1/CD74/PYCARD/PYDC1	15
BP	GO:0043154	negative regulation of cysteine-type endopeptidase activity involved in apoptotic process	10/554	78/18722	9.80074e-05	0.00150228	0.00103953	CRYAB/AQP1/GAS6/KLF4/CD27/NR4A1/BIRC3/SFN/LAMP3/SFRP2	10
BP	GO:0060425	lung morphogenesis	8/554	50/18722	0.000100343	0.00152622	0.00105609	SPRY2/LIF/SPRY1/HOXA5/TGFBR2/TNC/NFIB/FOXA1	8
BP	GO:0002408	myeloid dendritic cell chemotaxis	3/554	4/18722	0.000100821	0.00152622	0.00105609	CCL21/CCL19/CCR7	3
BP	GO:0071603	endothelial cell-cell adhesion	3/554	4/18722	0.000100821	0.00152622	0.00105609	CCN3/THBS4/CYP1B1	3
BP	GO:1903237	negative regulation of leukocyte tethering or rolling	3/554	4/18722	0.000100821	0.00152622	0.00105609	CCL21/CCL28/CXCL12	3
BP	GO:0006939	smooth muscle contraction	12/554	110/18722	0.000100836	0.00152622	0.00105609	CNN1/MYH11/CAV1/EDN1/MYLK/EDN3/KIT/RGS2/ACTA2/OXTR/SPHK1/NPNT	12
BP	GO:0048565	digestive tract development	13/554	127/18722	0.000101291	0.00152784	0.00105722	SFRP1/TP63/SOX17/KIT/HOXA5/EGFR/TGFBR2/OXTR/KLF5/RARRES2/WNT11/ASS1/SFRP2	13
BP	GO:0044706	multi-multicellular organism process	18/554	220/18722	0.00010145	0.00152784	0.00105722	PTN/LEP/MMP7/ITGB4/EDN1/JUNB/LIF/COL16A1/RGS2/FOSB/TGFBR2/ETS1/FOS/OXTR/FBLN1/PRLR/MMP2/ESR1	18
BP	GO:0080164	regulation of nitric oxide metabolic process	9/554	64/18722	0.000105357	0.00158272	0.00109519	CAV1/EDN1/KLF2/PTX3/KLF4/CD36/ICAM1/ASS1/HBB	9
BP	GO:0060070	canonical Wnt signaling pathway	22/554	303/18722	0.000107172	0.00160598	0.00111129	SFRP1/CAV1/SOX17/TMEM88/PLEKHA4/FGF2/TCF7/IGFBP6/EGR1/CDH3/FOLR1/TCF7L1/TNN/KLF4/EGFR/FZD7/LGR6/SOSTDC1/WNT11/FRZB/APOE/SFRP2	22
BP	GO:0060512	prostate gland morphogenesis	6/554	27/18722	0.00011381	0.00170123	0.0011772	SFRP1/TP63/SERPINB5/TNC/FOXA1/ESR1	6
BP	GO:0045104	intermediate filament cytoskeleton organization	8/554	51/18722	0.000115966	0.00172916	0.00119652	KRT17/KRT14/SYNM/KRT16/VIM/PKP1/DST/NES	8
BP	GO:0043087	regulation of GTPase activity	24/554	348/18722	0.000117481	0.00174743	0.00120917	SFRP1/CCL14/CAV2/CCL21/CX3CL1/CCL19/S1PR1/SPRY2/RASIP1/EPHA2/MET/SPRY1/RGMA/CCL17/NEDD9/CCL5/CCL22/CCR7/NTRK2/ICAM1/WNT11/CCL2/PYCARD/CXCL13	24
BP	GO:0048145	regulation of fibroblast proliferation	10/554	80/18722	0.000121648	0.00180495	0.00124897	NGFR/SFRP1/AQP1/GAS6/GSTP1/SPHK1/CDC6/CD74/S100A6/ESR1	10
BP	GO:1901655	cellular response to ketone	11/554	96/18722	0.000125218	0.00185334	0.00128246	SFRP1/AQP1/GAS6/KLF2/AKR1C3/KLF4/EGFR/ICAM1/FBXO32/ASS1/TNC	11
BP	GO:0042476	odontogenesis	13/554	130/18722	0.000128536	0.0018978	0.00131322	NGFR/TP63/OSR1/AQP1/KLK5/EDN1/ALPL/FAM20C/ID3/FOXC1/SOSTDC1/FST/TNC	13
BP	GO:0051154	negative regulation of striated muscle cell differentiation	7/554	39/18722	0.000129183	0.00189805	0.00131339	CCN3/PI16/BHLHE41/RGS2/TMEM119/FZD7/CEACAM5	7
BP	GO:0071548	response to dexamethasone	7/554	39/18722	0.000129183	0.00189805	0.00131339	AQP1/EDN1/EGFR/ICAM1/FBXO32/ASS1/CLDN1	7
BP	GO:0001666	response to hypoxia	22/554	307/18722	0.000129523	0.00189841	0.00131364	SFRP1/KCNMB1/S100B/SOD3/CRYAB/CAV1/PTN/LEP/AQP1/ADIPOQ/EDN1/CYGB/EGR1/NOP53/ANGPTL4/TGFBR2/CYBA/ETS1/ICAM1/CXCL12/PDLIM1/MMP2	22
BP	GO:0045103	intermediate filament-based process	8/554	52/18722	0.000133545	0.00194797	0.00134794	KRT17/KRT14/SYNM/KRT16/VIM/PKP1/DST/NES	8
BP	GO:0030193	regulation of blood coagulation	9/554	66/18722	0.000134376	0.00194797	0.00134794	CAV1/PROS1/SERPINF2/EDN1/C1QTNF1/SERPING1/F3/CD36/APOE	9
BP	GO:0050766	positive regulation of phagocytosis	9/554	66/18722	0.000134376	0.00194797	0.00134794	GAS6/C3/MFGE8/PTX3/CYBA/CD36/IL2RG/CCL2/PYCARD	9
BP	GO:0050918	positive chemotaxis	9/554	66/18722	0.000134376	0.00194797	0.00134794	CX3CL1/S1PR1/FGF2/F3/MET/CORO1A/LGALS3/CCL5/CXCL12	9
BP	GO:0001523	retinoid metabolic process	10/554	81/18722	0.000135168	0.00194797	0.00134794	RBP4/ADH1B/LIPE/AKR1C3/SCPEP1/ALDH1A1/RARRES2/DGAT2/CYP1B1/RBP1	10
BP	GO:0046209	nitric oxide metabolic process	10/554	81/18722	0.000135168	0.00194797	0.00134794	CAV1/EDN1/KLF2/PTX3/KLF4/CD36/ICAM1/ASS1/HBB/CYP1B1	10
BP	GO:0048144	fibroblast proliferation	10/554	81/18722	0.000135168	0.00194797	0.00134794	NGFR/SFRP1/AQP1/GAS6/GSTP1/SPHK1/CDC6/CD74/S100A6/ESR1	10
BP	GO:0060525	prostate glandular acinus development	4/554	10/18722	0.000138179	0.00198309	0.00137223	SFRP1/TP63/FOXA1/ESR1	4
BP	GO:0002544	chronic inflammatory response	5/554	18/18722	0.000138645	0.00198309	0.00137223	CCL5/TNFAIP3/S100A9/S100A8/CXCL13	5
BP	GO:0060602	branch elongation of an epithelium	5/554	18/18722	0.000138645	0.00198309	0.00137223	SPRY2/SPRY1/TNC/AREG/ESR1	5
BP	GO:0090101	negative regulation of transmembrane receptor protein serine/threonine kinase signaling pathway	13/554	131/18722	0.000138921	0.00198309	0.00137223	SFRP1/CAV2/CHRDL1/CAV1/CIDEA/SPRY2/CCN3/SPRY1/EMILIN1/SOSTDC1/FST/SFRP2/CILP	13
BP	GO:0016525	negative regulation of angiogenesis	14/554	149/18722	0.000139969	0.00198861	0.00137606	NPR1/CLDN5/PTN/ECSCR/SPRY2/ADAMTS1/EPHA2/KLF2/HOXA5/ISM1/KLF4/FOXC1/EMILIN1/THBS4	14
BP	GO:0051592	response to calcium ion	14/554	149/18722	0.000139969	0.00198861	0.00137606	KCNMB1/CAV1/KCNIP2/EDN1/JUNB/SYT8/CPNE3/AKR1C3/FOSB/EGFR/FOS/TXNIP/DUSP1/SYT13	14
BP	GO:0046660	female sex differentiation	12/554	114/18722	0.000142298	0.00201695	0.00139566	SFRP1/TP63/RBP4/LEP/ADAMTS1/PTX3/KIT/FOXC1/CEBPB/ICAM1/FST/ESR1	12
BP	GO:0003002	regionalization	23/554	331/18722	0.000145016	0.00205064	0.00141898	SFRP1/TP63/MEOX1/IRX1/SOX17/OSR1/ETS2/C3/EDN1/FGF2/BHLHE41/MEOX2/EGR2/SPRY1/HOXA5/FOXC1/SOSTDC1/WNT11/MDFI/C1QA/BTG2/SFRP2/FOXA1	23
BP	GO:2001057	reactive nitrogen species metabolic process	10/554	82/18722	0.000149934	0.00211513	0.0014636	CAV1/EDN1/KLF2/PTX3/KLF4/CD36/ICAM1/ASS1/HBB/CYP1B1	10
BP	GO:0001959	regulation of cytokine-mediated signaling pathway	14/554	150/18722	0.000150278	0.00211513	0.0014636	CAV1/ADIPOQ/GAS6/EDN1/IL6/GSTP1/CCDC3/CCL5/SOCS1/TNFAIP3/SPHK1/CD74/PYCARD/PYDC1	14
BP	GO:0070301	cellular response to hydrogen peroxide	11/554	98/18722	0.000150864	0.00211842	0.00146588	AQP1/ANXA1/IL6/MET/KLF2/KLF4/ETS1/LCN2/TNFAIP3/SPHK1/CYP1B1	11
BP	GO:0010517	regulation of phospholipase activity	9/554	67/18722	0.000151218	0.00211846	0.00146591	ANXA1/CCN1/FGF2/S1PR4/KIT/RGS2/EGFR/CCL5/ESR1	9
BP	GO:0016055	Wnt signaling pathway	28/554	444/18722	0.000152056	0.00212346	0.00146937	SFRP1/CAV1/SOX17/TRABD2B/TMEM88/PLEKHA4/NDRG2/FGF2/TCF7/IGFBP6/EGR1/CDH3/FOLR1/TCF7L1/TNN/KLF4/EGFR/FZD7/LGR6/TNFAIP3/WIF1/SOSTDC1/WNT11/FRZB/MDFI/VANGL2/APOE/SFRP2	28
BP	GO:0071276	cellular response to cadmium ion	7/554	40/18722	0.000152633	0.00212346	0.00146937	MT1M/MT1X/JUN/AKR1C3/EGFR/FOS/MT1E	7
BP	GO:0150077	regulation of neuroinflammatory response	7/554	40/18722	0.000152633	0.00212346	0.00146937	IL33/CX3CL1/TNFRSF1B/IL6/MMP3/CST7/SPHK1	7
BP	GO:0031214	biomineral tissue development	15/554	169/18722	0.00015503	0.00215184	0.00148901	PTN/LEP/OSR1/GAS6/S1PR1/ALPL/CCN1/LTF/FAM20C/CLEC3B/TMEM119/SRGN/CEBPB/WNT11/MGP	15
BP	GO:2000181	negative regulation of blood vessel morphogenesis	14/554	151/18722	0.000161238	0.00223286	0.00154507	NPR1/CLDN5/PTN/ECSCR/SPRY2/ADAMTS1/EPHA2/KLF2/HOXA5/ISM1/KLF4/FOXC1/EMILIN1/THBS4	14
BP	GO:0046328	regulation of JNK cascade	13/554	133/18722	0.000161876	0.00223656	0.00154763	SFRP1/CCL21/CCL19/SERPINF2/GSTP1/PER1/CCN2/EGFR/CD27/FZD7/CCR7/PYCARD/SFRP2	13
BP	GO:0198738	cell-cell signaling by wnt	28/554	446/18722	0.000163864	0.00225884	0.00156305	SFRP1/CAV1/SOX17/TRABD2B/TMEM88/PLEKHA4/NDRG2/FGF2/TCF7/IGFBP6/EGR1/CDH3/FOLR1/TCF7L1/TNN/KLF4/EGFR/FZD7/LGR6/TNFAIP3/WIF1/SOSTDC1/WNT11/FRZB/MDFI/VANGL2/APOE/SFRP2	28
BP	GO:0045926	negative regulation of growth	19/554	249/18722	0.000164751	0.00226589	0.00156793	SFRP1/CRYAB/RBP4/NPR1/SOX17/MT1M/MT1X/CCN3/PI16/FHL1/SEMA3G/RGMA/RGS2/TGFBR2/WNT11/SCGB3A1/FRZB/SFRP2/MT1E	19
BP	GO:0030178	negative regulation of Wnt signaling pathway	15/554	170/18722	0.000165504	0.00227106	0.0015715	SFRP1/CAV1/SOX17/TRABD2B/TMEM88/IGFBP6/EGR1/TNN/WIF1/SOSTDC1/WNT11/FRZB/MDFI/APOE/SFRP2	15
BP	GO:0006720	isoprenoid metabolic process	12/554	116/18722	0.000167998	0.00229261	0.00158641	RBP4/ADH1B/LIPE/AKR1C3/EGFR/SCPEP1/ALDH1A1/RARRES2/DGAT2/CYP1B1/HMGCS2/RBP1	12
BP	GO:1990748	cellular detoxification	12/554	116/18722	0.000167998	0.00229261	0.00158641	SOD3/GPX3/FBLN5/CYGB/GSTP1/PIM1/CD36/ALDH1A1/HBB/APOE/GSTA1/S100A9	12
BP	GO:0071695	anatomical structure maturation	18/554	229/18722	0.000168216	0.00229261	0.00158641	CCL21/CX3CL1/CCL19/LEP/KCNIP2/S1PR1/C3/CDH3/LTF/KLF2/DEFB1/SOX18/HOXA5/C1QA/CNTNAP2/MMP2/FOXA1/NTN4	18
BP	GO:0032922	circadian regulation of gene expression	9/554	68/18722	0.000169786	0.00229841	0.00159043	NGFR/ID1/ID4/EGR1/CAVIN3/BHLHE41/RELB/PER1/ID3	9
BP	GO:0046686	response to cadmium ion	9/554	68/18722	0.000169786	0.00229841	0.00159043	MT1M/MT1X/KIT/JUN/AKR1C3/PRNP/EGFR/FOS/MT1E	9
BP	GO:1900046	regulation of hemostasis	9/554	68/18722	0.000169786	0.00229841	0.00159043	CAV1/PROS1/SERPINF2/EDN1/C1QTNF1/SERPING1/F3/CD36/APOE	9
BP	GO:1901343	negative regulation of vasculature development	14/554	152/18722	0.000172881	0.00233096	0.00161295	NPR1/CLDN5/PTN/ECSCR/SPRY2/ADAMTS1/EPHA2/KLF2/HOXA5/ISM1/KLF4/FOXC1/EMILIN1/THBS4	14
BP	GO:0001818	negative regulation of cytokine production	24/554	357/18722	0.000172965	0.00233096	0.00161295	VSIR/CX3CL1/CIDEA/ADIPOQ/GAS6/NDRG2/ANXA1/IL27RA/ZFP36/IL6/EPHA2/GSTP1/CDH3/RELB/LTF/KLF2/KLF4/PRNP/APOD/TNFAIP3/CCR7/SRGN/WNT11/PYCARD	24
BP	GO:2000406	positive regulation of T cell migration	6/554	29/18722	0.000173684	0.00233543	0.00161604	CCL21/CCL5/CXCL12/PYCARD/CXCL13/S100A7	6
BP	GO:0110148	biomineralization	15/554	171/18722	0.000176586	0.00236917	0.00163939	PTN/LEP/OSR1/GAS6/S1PR1/ALPL/CCN1/LTF/FAM20C/CLEC3B/TMEM119/SRGN/CEBPB/WNT11/MGP	15
BP	GO:1902622	regulation of neutrophil migration	7/554	41/18722	0.000179412	0.00240173	0.00166192	CCL21/CCL19/EDN1/RAC2/CCR7/CD74/THBS4	7
BP	GO:0014902	myotube differentiation	12/554	117/18722	0.00018227	0.00243458	0.00168466	CAV2/JAM2/CCN3/IL4R/BHLHE41/RCAN1/EHD2/TMEM119/KLF5/SCGB3A1/CEACAM5/CXCL9	12
BP	GO:0048245	eosinophil chemotaxis	5/554	19/18722	0.000183603	0.00244696	0.00169322	CCL21/CX3CL1/LGALS3/CCL5/CCL2	5
BP	GO:0048568	embryonic organ development	27/554	427/18722	0.000190181	0.00252903	0.00175001	RBP4/SOX17/OSR1/SPRY2/SOCS3/EDN1/JUNB/CCN1/LIF/EPHA2/KIT/SOX18/HOXA5/FOLR1/ID3/TGFBR2/FOXC1/CEBPB/RARRES2/NES/WNT11/FRZB/MDFI/VANGL2/EFEMP1/IGF2/COL11A1	27
BP	GO:1905517	macrophage migration	8/554	55/18722	0.00019992	0.00265269	0.00183558	SAA1/IL34/CX3CL1/LGALS3/CCL5/EMILIN1/RARRES2/CCL2	8
BP	GO:0060828	regulation of canonical Wnt signaling pathway	19/554	253/18722	0.000202286	0.00267693	0.00185235	SFRP1/CAV1/SOX17/TMEM88/PLEKHA4/FGF2/IGFBP6/EGR1/CDH3/FOLR1/TNN/EGFR/FZD7/LGR6/SOSTDC1/WNT11/FRZB/APOE/SFRP2	19
BP	GO:0042509	regulation of tyrosine phosphorylation of STAT protein	10/554	85/18722	0.000202636	0.00267693	0.00185235	CAV1/LEP/SOCS3/LIF/IL6/KIT/HCLS1/CCL5/SOCS1/CRLF1	10
BP	GO:0002697	regulation of immune effector process	23/554	339/18722	0.000205574	0.0027098	0.0018751	RBP4/CCL19/LEP/CD1C/C3/KLK5/ANXA1/IL27RA/A2M/TNFRSF1B/IL6/SERPING1/KLK7/IL4R/KIT/RAC2/LGALS3/CD36/IL7R/SPON2/ICAM1/CD74/MZB1	23
BP	GO:0001935	endothelial cell proliferation	16/554	193/18722	0.000208965	0.00274848	0.00190186	NGFR/CAV2/CAV1/LEP/FGF2/EPHA2/F3/EGFL7/CYBA/NR4A1/EGR3/CXCL12/CCL2/THBS4/APOE/IGF2	16
BP	GO:0046688	response to copper ion	7/554	42/18722	0.000209864	0.00274988	0.00190283	SOD3/MT1M/MT1X/AQP1/PRNP/ICAM1/MT1E	7
BP	GO:0050890	cognition	21/554	296/18722	0.000209984	0.00274988	0.00190283	S100B/CLDN5/PTN/FAM107A/SGK1/RCAN1/EGR2/KIT/JUN/MME/PRNP/EGFR/FOS/OXTR/NTRK2/CEBPB/KLK8/CNTNAP2/APOE/BTG2/PPP1R1B	21
BP	GO:0010453	regulation of cell fate commitment	6/554	30/18722	0.000211721	0.00276509	0.00191336	SOX17/FGF2/FZD7/SOSTDC1/WNT11/SFRP2	6
BP	GO:0002604	regulation of dendritic cell antigen processing and presentation	4/554	11/18722	0.000212064	0.00276509	0.00191336	CCL21/CCL19/CCR7/CD74	4
BP	GO:0034103	regulation of tissue remodeling	10/554	86/18722	0.000223336	0.00290578	0.00201071	SFRP1/LEP/S1PR1/IL6/EGFR/TF/TMEM119/PDK4/TNFAIP3/THBS4	10
BP	GO:1904645	response to amyloid-beta	8/554	56/18722	0.000227283	0.00295076	0.00204183	NGFR/PRNP/CD36/LCN2/MMP3/ICAM1/RAMP3/MMP2	8
BP	GO:0001933	negative regulation of protein phosphorylation	23/554	342/18722	0.000233487	0.00302478	0.00209306	SFRP1/CAV1/FABP4/ADIPOQ/CDKN1C/SPRY2/RASIP1/SOCS3/GSTP1/SPRY1/RGS2/PRNP/SOCS1/TNFAIP3/EMILIN1/DUSP1/FBLN1/SFN/APOE/PYCARD/SFRP2/PYDC1/PPP1R1B	23
BP	GO:0090092	regulation of transmembrane receptor protein serine/threonine kinase signaling pathway	19/554	256/18722	0.000235162	0.00303995	0.00210355	SFRP1/CAV2/CHRDL1/CAV1/CIDEA/LTBP4/CDKN1C/SPRY2/CCN1/CCN3/SPRY1/RGMA/FOLR1/EMILIN1/SOSTDC1/FST/SFRP2/CILP/NPNT	19
BP	GO:0031669	cellular response to nutrient levels	17/554	215/18722	0.00023595	0.0030436	0.00210608	SFRP1/PTN/LEP/GAS6/FAM107A/LPL/JUN/FOLR1/AKR1C3/IFI16/PIM1/LCN2/PDK4/ATF3/ICAM1/FOLR2/TNC	17
BP	GO:0043550	regulation of lipid kinase activity	9/554	71/18722	0.000237234	0.00304712	0.00210851	CCL21/CCL19/SOCS3/FGF2/KIT/KLF4/SOCS1/CCR7/EEF1A2	9
BP	GO:0050818	regulation of coagulation	9/554	71/18722	0.000237234	0.00304712	0.00210851	CAV1/PROS1/SERPINF2/EDN1/C1QTNF1/SERPING1/F3/CD36/APOE	9
BP	GO:0002577	regulation of antigen processing and presentation	5/554	20/18722	0.000238878	0.00306171	0.00211861	CCL21/CCL19/CCR7/CD74/PYCARD	5
BP	GO:0019915	lipid storage	10/554	87/18722	0.000245781	0.00313931	0.00217231	CAV1/LEP/CIDEA/C3/IL6/LPL/CES1/CD36/DGAT2/APOE	10
BP	GO:0003402	planar cell polarity pathway involved in axis elongation	3/554	5/18722	0.000246497	0.00313931	0.00217231	SFRP1/WNT11/SFRP2	3
BP	GO:0031581	hemidesmosome assembly	3/554	5/18722	0.000246497	0.00313931	0.00217231	COL17A1/ITGB4/DST	3
BP	GO:0031032	actomyosin structure organization	16/554	196/18722	0.0002491	0.00316578	0.00219062	SFRP1/CNN1/MYH11/SERPINF2/S1PR1/LMOD1/EDN1/CNN2/MET/SORBS1/ELN/CCN2/TACSTD2/FAM171A1/WNT11/PDLIM1	16
BP	GO:0030216	keratinocyte differentiation	13/554	139/18722	0.000251313	0.00318718	0.00220543	KRT17/TP63/KLK5/ANXA1/ZFP36/EPHA2/CDH3/KRT16/AKR1C3/FOXC1/TXNIP/SFN/S100A7	13
BP	GO:0033673	negative regulation of kinase activity	18/554	237/18722	0.000257137	0.00325418	0.00225179	SFRP1/CAV1/FABP4/ADIPOQ/CDKN1C/SPRY2/RASIP1/GSTP1/SPRY1/RGS2/TNFAIP3/DUSP1/SFN/APOE/PYCARD/SFRP2/PYDC1/PPP1R1B	18
BP	GO:0042246	tissue regeneration	9/554	72/18722	0.000264133	0.00333572	0.00230822	PTN/ANXA1/CCN3/KLK6/TGFBR2/FZD7/APOD/LGR6/KLF5	9
BP	GO:0007260	tyrosine phosphorylation of STAT protein	10/554	88/18722	0.000270084	0.00339664	0.00235037	CAV1/LEP/SOCS3/LIF/IL6/KIT/HCLS1/CCL5/SOCS1/CRLF1	10
BP	GO:0050829	defense response to Gram-negative bacterium	10/554	88/18722	0.000270084	0.00339664	0.00235037	SELP/AQP1/IL6/CTSG/LTF/DEFB1/IGHM/RARRES2/PYCARD/S100A7	10
BP	GO:0042445	hormone metabolic process	17/554	218/18722	0.000277833	0.0034868	0.00241276	RBP4/ADH1B/LEP/LIPE/CTSG/EGR1/AKR1C3/KLK6/MME/SCPEP1/ALDH1A1/DGAT2/CYP1B1/DIO1/RBP1/FOXA1/ESR1	17
BP	GO:0045124	regulation of bone resorption	7/554	44/18722	0.000283257	0.0035328	0.00244458	S1PR1/IL6/EGFR/TF/TMEM119/PDK4/TNFAIP3	7
BP	GO:0046427	positive regulation of receptor signaling pathway via JAK-STAT	7/554	44/18722	0.000283257	0.0035328	0.00244458	LEP/IL6/KIT/CCL5/SOCS1/PRLR/CYP1B1	7
BP	GO:0150076	neuroinflammatory response	7/554	44/18722	0.000283257	0.0035328	0.00244458	IL33/CX3CL1/TNFRSF1B/IL6/MMP3/CST7/SPHK1	7
BP	GO:0001936	regulation of endothelial cell proliferation	15/554	179/18722	0.000290878	0.00361731	0.00250306	NGFR/CAV2/CAV1/LEP/FGF2/F3/EGFL7/CYBA/NR4A1/EGR3/CXCL12/CCL2/THBS4/APOE/IGF2	15
BP	GO:0001954	positive regulation of cell-matrix adhesion	8/554	58/18722	0.000291234	0.00361731	0.00250306	SFRP1/CCL21/CX3CL1/COL16A1/CCL28/CD36/CD3E/CCR7	8
BP	GO:0090287	regulation of cellular response to growth factor stimulus	21/554	304/18722	0.0003013	0.00373463	0.00258425	NGFR/SFRP1/CAV2/CHRDL1/CAV1/CIDEA/LTBP4/CDKN1C/SPRY2/CCN1/FGF2/MMRN2/SPRY1/RGMA/FOLR1/EMILIN1/SOSTDC1/FST/SFRP2/NPNT/CXCL13	21
BP	GO:0030038	contractile actin filament bundle assembly	11/554	106/18722	0.000302755	0.00373729	0.00258609	SFRP1/SERPINF2/S1PR1/MET/SORBS1/ELN/CCN2/TACSTD2/FAM171A1/WNT11/PDLIM1	11
BP	GO:0043149	stress fiber assembly	11/554	106/18722	0.000302755	0.00373729	0.00258609	SFRP1/SERPINF2/S1PR1/MET/SORBS1/ELN/CCN2/TACSTD2/FAM171A1/WNT11/PDLIM1	11
BP	GO:0033687	osteoblast proliferation	6/554	32/18722	0.000307307	0.00377799	0.00261425	SFRP1/JUNB/CCN1/LTF/TNN/TMEM119	6
BP	GO:0035767	endothelial cell chemotaxis	6/554	32/18722	0.000307307	0.00377799	0.00261425	FGF2/CCN3/MET/NR4A1/EGR3/CXCL13	6
BP	GO:0002064	epithelial cell development	17/554	220/18722	0.000309214	0.00378799	0.00262117	TP63/CLDN5/ADIPOQ/EPHA2/MET/SOX18/VIM/PECAM1/HOXA5/COL18A1/ACTA2/KLF5/ICAM1/SFN/CLDN1/FOXA1/ESR1	17
BP	GO:0050729	positive regulation of inflammatory response	13/554	142/18722	0.000310007	0.00378799	0.00262117	IL33/CX3CL1/FABP4/C3/IL6/LPL/EGFR/ETS1/CCR7/CEBPB/PLA2G2A/S100A9/S100A8	13
BP	GO:0072006	nephron development	13/554	142/18722	0.000310007	0.00378799	0.00262117	IRX1/OSR1/ADIPOQ/FGF2/LIF/EGR1/PECAM1/ACTA2/TACSTD2/FOXC1/WNT11/PROM1/NPNT	13
BP	GO:0097237	cellular response to toxic substance	12/554	124/18722	0.00031426	0.00383219	0.00265176	SOD3/GPX3/FBLN5/CYGB/GSTP1/PIM1/CD36/ALDH1A1/HBB/APOE/GSTA1/S100A9	12
BP	GO:0003151	outflow tract morphogenesis	9/554	74/18722	0.00032554	0.00393564	0.00272334	CLDN5/SOX17/ELN/SOX18/FOLR1/TGFBR2/FOXC1/WNT11/SFRP2	9
BP	GO:0030850	prostate gland development	7/554	45/18722	0.000326986	0.00393564	0.00272334	SFRP1/TP63/SERPINB5/ANXA1/TNC/FOXA1/ESR1	7
BP	GO:0045933	positive regulation of muscle contraction	7/554	45/18722	0.000326986	0.00393564	0.00272334	EDN1/KIT/RGS2/CCN2/OXTR/SPHK1/NPNT	7
BP	GO:0045766	positive regulation of angiogenesis	15/554	181/18722	0.000327836	0.00393564	0.00272334	HSPB6/AQP1/C3/CHI3L1/FGF2/F3/ANXA3/ANGPTL4/KLF4/TGFBR2/ETS1/SPHK1/S100A1/SFRP2/CYP1B1	15
BP	GO:1904018	positive regulation of vasculature development	15/554	181/18722	0.000327836	0.00393564	0.00272334	HSPB6/AQP1/C3/CHI3L1/FGF2/F3/ANXA3/ANGPTL4/KLF4/TGFBR2/ETS1/SPHK1/S100A1/SFRP2/CYP1B1	15
BP	GO:0043551	regulation of phosphatidylinositol 3-kinase activity	8/554	59/18722	0.000328322	0.00393564	0.00272334	CCL21/CCL19/SOCS3/FGF2/KIT/KLF4/SOCS1/CCR7	8
BP	GO:0042303	molting cycle	11/554	107/18722	0.000328624	0.00393564	0.00272334	KRT17/KRT14/NGFR/TP63/CDH3/KRT16/PER1/SOX18/EGFR/SOSTDC1/FST	11
BP	GO:0042633	hair cycle	11/554	107/18722	0.000328624	0.00393564	0.00272334	KRT17/KRT14/NGFR/TP63/CDH3/KRT16/PER1/SOX18/EGFR/SOSTDC1/FST	11
BP	GO:0051341	regulation of oxidoreductase activity	11/554	107/18722	0.000328624	0.00393564	0.00272334	CAV1/LEP/EDN1/AOC3/CDH3/EDN3/EGFR/CYBA/GZMA/S100A1/APOE	11
BP	GO:0003018	vascular process in circulatory system	19/554	263/18722	0.000330613	0.00395161	0.00273439	KCNMB1/SOD3/NPR1/CLDN5/CAV1/LEP/SERPINF2/EDN1/KLF2/EDN3/RGS2/ACTA2/EGFR/CD36/FOXC1/OXTR/SCPEP1/ICAM1/APOE	19
BP	GO:2000027	regulation of animal organ morphogenesis	12/554	125/18722	0.000338496	0.00403782	0.00279405	NGFR/SFRP1/PLEKHA4/EDN1/FGF2/SPRY1/TACSTD2/FZD7/WNT11/VANGL2/SFRP2/NTN4	12
BP	GO:2001235	positive regulation of apoptotic signaling pathway	12/554	126/18722	0.000364296	0.00433699	0.00300107	NGFR/SFRP1/TP63/G0S2/CAV1/SRPX/ITM2C/ATF3/LCK/PYCARD/S100A9/S100A8	12
BP	GO:0036336	dendritic cell migration	6/554	33/18722	0.000366299	0.00434367	0.00300569	CCL21/CCL19/GAS6/CCL5/GPR183/CCR7	6
BP	GO:0048730	epidermis morphogenesis	6/554	33/18722	0.000366299	0.00434367	0.00300569	KRT17/NGFR/TP63/KLF4/SOSTDC1/FST	6
BP	GO:0009620	response to fungus	8/554	60/18722	0.000369171	0.00436913	0.0030233	CTSG/LTF/PTX3/SPON2/COTL1/RARRES2/S100A9/S100A8	8
BP	GO:0043616	keratinocyte proliferation	7/554	46/18722	0.000375966	0.00444082	0.00307291	TP63/ZFP36/CDH3/SFN/KLK8/FST/AREG	7
BP	GO:0072009	nephron epithelium development	11/554	109/18722	0.000385966	0.00453689	0.00313939	IRX1/OSR1/ADIPOQ/FGF2/LIF/PECAM1/TACSTD2/FOXC1/WNT11/PROM1/NPNT	11
BP	GO:0072574	hepatocyte proliferation	5/554	22/18722	0.000386359	0.00453689	0.00313939	LIMS2/PTN/IL6/TNFAIP3/CEBPB	5
BP	GO:0072575	epithelial cell proliferation involved in liver morphogenesis	5/554	22/18722	0.000386359	0.00453689	0.00313939	LIMS2/PTN/IL6/TNFAIP3/CEBPB	5
BP	GO:0034599	cellular response to oxidative stress	20/554	288/18722	0.000388881	0.00455763	0.00315374	SOD3/FBLN5/AQP1/ANXA1/IL6/MET/KLF2/JUN/AKR1C3/KLF4/EGFR/CD36/ETS1/LCN2/MMP3/FOS/TNFAIP3/SPHK1/MMP2/CYP1B1	20
BP	GO:0010001	glial cell differentiation	17/554	225/18722	0.000401437	0.00468654	0.00324294	S100B/IL34/PTN/ITGB4/FGF2/LIF/TNFRSF1B/IL6/GSTP1/EGR2/VIM/EGFR/NTRK2/C1QA/NFIB/S100A9/S100A8	17
BP	GO:0016485	protein processing	17/554	225/18722	0.000401437	0.00468654	0.00324294	GSN/VSIR/C1R/SERPINF2/CTSG/F3/CPXM1/CPXM2/KLK6/CLEC3B/IFI16/MME/PRNP/CST7/SRGN/GAS1/PYCARD	17
BP	GO:0045580	regulation of T cell differentiation	13/554	146/18722	0.000406143	0.00473231	0.00327461	VSIR/CCL19/ANXA1/TCF7/IL4R/RUNX3/TGFBR2/IL7R/CD27/SOCS1/EGR3/CD2/CD74	13
BP	GO:0051348	negative regulation of transferase activity	19/554	268/18722	0.000417992	0.00486097	0.00336364	SFRP1/CAV1/FABP4/ADIPOQ/CDKN1C/SPRY2/RASIP1/ZFP36/GSTP1/SPRY1/RGS2/TNFAIP3/DUSP1/SFN/APOE/PYCARD/SFRP2/PYDC1/PPP1R1B	19
BP	GO:0007589	body fluid secretion	10/554	93/18722	0.000423853	0.00491017	0.00339769	NPR1/CAV1/AQP1/EDN1/CDO1/EGFR/CYBA/OXTR/KCNN4/PRLR	10
BP	GO:0032755	positive regulation of interleukin-6 production	10/554	93/18722	0.000423853	0.00491017	0.00339769	IL33/LEP/IL6/LPL/RAB7B/CYBA/CD36/SPON2/CD74/PYCARD	10
BP	GO:0003044	regulation of systemic arterial blood pressure mediated by a chemical signal	7/554	47/18722	0.000430642	0.00496021	0.00343231	SERPINF2/EDN1/CTSG/EDN3/MME/CYBA/OXTR	7
BP	GO:0031641	regulation of myelination	7/554	47/18722	0.000430642	0.00496021	0.00343231	S100B/PTN/JAM2/TNFRSF1B/EGR2/CST7/KLK8	7
BP	GO:0097028	dendritic cell differentiation	7/554	47/18722	0.000430642	0.00496021	0.00343231	CCL19/GAS6/RELB/TGFBR2/CCR7/CEBPB/UBD	7
BP	GO:0001768	establishment of T cell polarity	4/554	13/18722	0.000438279	0.00500036	0.0034601	GSN/CCL21/CCL19/CCR7	4
BP	GO:0016322	neuron remodeling	4/554	13/18722	0.000438279	0.00500036	0.0034601	CX3CL1/C3/C1QA/NTN4	4
BP	GO:0070486	leukocyte aggregation	4/554	13/18722	0.000438279	0.00500036	0.0034601	JAM2/RAC2/S100A9/S100A8	4
BP	GO:1900272	negative regulation of long-term synaptic potentiation	4/554	13/18722	0.000438279	0.00500036	0.0034601	PTN/FAM107A/PRNP/APOE	4
BP	GO:1904995	negative regulation of leukocyte adhesion to vascular endothelial cell	4/554	13/18722	0.000438279	0.00500036	0.0034601	CCL21/CCL28/KLF4/CXCL12	4
BP	GO:0060485	mesenchyme development	20/554	291/18722	0.000444036	0.00505647	0.00349892	SFRP1/MEOX1/OSR1/ACTG2/SPRY2/EDN1/IL6/EDN3/SPRY1/SEMA3G/HOXA5/FOLR1/ACTA2/TGFBR2/GLIPR2/FOXC1/WNT11/FRZB/SFRP2/FOXA1	20
BP	GO:0014066	regulation of phosphatidylinositol 3-kinase signaling	11/554	111/18722	0.00045148	0.00512187	0.00354418	SELP/LEP/FGF2/HCST/NOP53/KIT/KLF4/HCLS1/EGFR/CCL5/NTRK2	11
BP	GO:0090288	negative regulation of cellular response to growth factor stimulus	11/554	111/18722	0.00045148	0.00512187	0.00354418	NGFR/SFRP1/CHRDL1/SPRY2/FGF2/MMRN2/SPRY1/EMILIN1/SOSTDC1/SFRP2/CXCL13	11
BP	GO:0007254	JNK cascade	14/554	167/18722	0.000456756	0.00517198	0.00357885	SFRP1/CCL21/CCL19/SERPINF2/CDC42EP5/GSTP1/PER1/CCN2/EGFR/CD27/FZD7/CCR7/PYCARD/SFRP2	14
BP	GO:0032731	positive regulation of interleukin-1 beta production	8/554	62/18722	0.00046329	0.00522356	0.00361454	CCL19/IL6/LPL/EGR1/IFI16/CD36/PYCARD/PYDC1	8
BP	GO:0032757	positive regulation of interleukin-8 production	8/554	62/18722	0.00046329	0.00522356	0.00361454	LEP/ADIPOQ/CHI3L1/IL6/F3/CD2/CD74/PYCARD	8
BP	GO:0008064	regulation of actin polymerization or depolymerization	15/554	187/18722	0.000463912	0.00522356	0.00361454	GSN/CCL21/LMOD1/CDC42EP5/GMFG/ELN/HCLS1/CORO1A/CDC42EP1/COTL1/CCR7/ICAM1/CXCL12/ARHGAP40/PYCARD	15
BP	GO:0010804	negative regulation of tumor necrosis factor-mediated signaling pathway	5/554	23/18722	0.000481757	0.00535871	0.00370806	ADIPOQ/GAS6/GSTP1/CCDC3/PYDC1	5
BP	GO:0036303	lymph vessel morphogenesis	5/554	23/18722	0.000481757	0.00535871	0.00370806	EPHA2/CLEC14A/SOX18/LGALS12/FOXC1	5
BP	GO:0072576	liver morphogenesis	5/554	23/18722	0.000481757	0.00535871	0.00370806	LIMS2/PTN/IL6/TNFAIP3/CEBPB	5
BP	GO:0072677	eosinophil migration	5/554	23/18722	0.000481757	0.00535871	0.00370806	CCL21/CX3CL1/LGALS3/CCL5/CCL2	5
BP	GO:0033634	positive regulation of cell-cell adhesion mediated by integrin	3/554	6/18722	0.000482142	0.00535871	0.00370806	CD3E/CCL5/CXCL13	3
BP	GO:0048865	stem cell fate commitment	3/554	6/18722	0.000482142	0.00535871	0.00370806	SFRP1/SOX17/SOX18	3
BP	GO:0060028	convergent extension involved in axis elongation	3/554	6/18722	0.000482142	0.00535871	0.00370806	SFRP1/WNT11/SFRP2	3
BP	GO:1903556	negative regulation of tumor necrosis factor superfamily cytokine production	9/554	78/18722	0.000483917	0.00536853	0.00371486	VSIR/CX3CL1/CIDEA/ADIPOQ/GAS6/IL27RA/GSTP1/LTF/TNFAIP3	9
BP	GO:0030832	regulation of actin filament length	15/554	188/18722	0.000490742	0.00543248	0.00375911	GSN/CCL21/LMOD1/CDC42EP5/GMFG/ELN/HCLS1/CORO1A/CDC42EP1/COTL1/CCR7/ICAM1/CXCL12/ARHGAP40/PYCARD	15
BP	GO:2001238	positive regulation of extrinsic apoptotic signaling pathway	7/554	48/18722	0.000491484	0.00543248	0.00375911	SFRP1/G0S2/CAV1/SRPX/ITM2C/ATF3/PYCARD	7
BP	GO:0048872	homeostasis of number of cells	19/554	272/18722	0.0005017	0.00553524	0.00383021	ANXA1/ZFP36/IL6/CCN3/EMCN/KLF2/KIT/SPNS2/HOXA5/HCLS1/CORO1A/IL7R/ETS1/TNFAIP3/SIT1/GPR183/CCR7/PLA2G2A/CD74	19
BP	GO:0008585	female gonad development	10/554	95/18722	0.000502963	0.00553903	0.00383284	SFRP1/LEP/ADAMTS1/PTX3/KIT/FOXC1/CEBPB/ICAM1/FST/ESR1	10
BP	GO:0019058	viral life cycle	21/554	317/18722	0.000524413	0.00575808	0.00398441	GSN/CAV2/CAV1/GAS6/EPHA2/SLPI/APOBEC3C/LTF/PTX3/IFI16/EGFR/CCL5/ICAM1/TOP2A/CCL2/CD74/LAMP3/WWP1/CLDN1/APOE/ANPEP	21
BP	GO:0098742	cell-cell adhesion via plasma-membrane adhesion molecules	19/554	273/18722	0.000524765	0.00575808	0.00398441	CLDN11/FAT2/CX3CL1/SELP/CADM3/CLDN5/DSG3/DSC3/ADIPOQ/CDH3/SPARCL1/PECAM1/KLF4/TGFBR2/FXYD5/ICAM1/SELL/CLDN1/CEACAM5	19
BP	GO:1904035	regulation of epithelial cell apoptotic process	10/554	96/18722	0.000546887	0.0059899	0.00414483	GSN/ECSCR/GAS6/ZFP36/IL6/ANGPTL4/AKR1C3/TNFAIP3/ICAM1/CCL2	10
BP	GO:0030041	actin filament polymerization	15/554	190/18722	0.000548401	0.00599558	0.00414876	GSN/CCL21/LMOD1/FAM107A/CDC42EP5/GMFG/ELN/HCLS1/CORO1A/CDC42EP1/COTL1/CCR7/ICAM1/ARHGAP40/PYCARD	15
BP	GO:0006692	prostanoid metabolic process	7/554	49/18722	0.000558981	0.00605543	0.00419017	PTGDS/ANXA1/EDN1/GSTP1/AKR1C3/CD74/GSTA1	7
BP	GO:0006693	prostaglandin metabolic process	7/554	49/18722	0.000558981	0.00605543	0.00419017	PTGDS/ANXA1/EDN1/GSTP1/AKR1C3/CD74/GSTA1	7
BP	GO:0006953	acute-phase response	7/554	49/18722	0.000558981	0.00605543	0.00419017	SAA1/SAA2/SERPINF2/IL6/LCN2/CEBPB/ASS1	7
BP	GO:0030857	negative regulation of epithelial cell differentiation	7/554	49/18722	0.000558981	0.00605543	0.00419017	TP63/CAV1/OSR1/ID1/SPRY2/SPRY1/FRZB	7
BP	GO:0050832	defense response to fungus	7/554	49/18722	0.000558981	0.00605543	0.00419017	CTSG/LTF/SPON2/COTL1/RARRES2/S100A9/S100A8	7
BP	GO:0044409	entry into host	13/554	151/18722	0.000560911	0.00605543	0.00419017	GSN/CAV2/CAV1/GAS6/EPHA2/PTX3/EGFR/ICAM1/CD74/WWP1/KRT6A/CLDN1/ANPEP	13
BP	GO:2001236	regulation of extrinsic apoptotic signaling pathway	13/554	151/18722	0.000560911	0.00605543	0.00419017	SFRP1/G0S2/CX3CL1/CAV1/GSTP1/SRPX/ITM2C/LGALS3/ATF3/TNFAIP3/ICAM1/PYCARD/SFRP2	13
BP	GO:1904892	regulation of receptor signaling pathway via STAT	11/554	114/18722	0.000567041	0.00611066	0.00422838	CAV1/LEP/SOCS3/LIF/IL6/KIT/IL7R/CCL5/SOCS1/PRLR/CYP1B1	11
BP	GO:0002366	leukocyte activation involved in immune response	19/554	275/18722	0.000573661	0.00617096	0.00427011	CCL19/CD1C/PTGDS/MFNG/ITM2A/ANXA1/IL27RA/IL6/IL4R/ANXA3/RELB/KIT/RAC2/CORO1A/LGALS3/GPR183/ICAM1/CD74/PYCARD	19
BP	GO:0006940	regulation of smooth muscle contraction	8/554	64/18722	0.000575987	0.00618493	0.00427978	CNN1/CAV1/EDN1/KIT/RGS2/OXTR/SPHK1/NPNT	8
BP	GO:0030833	regulation of actin filament polymerization	14/554	171/18722	0.000579216	0.0061975	0.00428848	GSN/CCL21/LMOD1/CDC42EP5/GMFG/ELN/HCLS1/CORO1A/CDC42EP1/COTL1/CCR7/ICAM1/ARHGAP40/PYCARD	14
BP	GO:0046890	regulation of lipid biosynthetic process	14/554	171/18722	0.000579216	0.0061975	0.00428848	LEP/C3/ANXA1/CCN1/EGR1/SORBS1/CES1/CCDC3/AKR1C3/PDK4/SPHK1/CD74/DGAT2/APOE	14
BP	GO:0001570	vasculogenesis	9/554	80/18722	0.00058411	0.00623879	0.00431705	CAV1/SOX17/RASIP1/JUNB/EPHA2/SOX18/EGFL7/TGFBR2/NTRK2	9
BP	GO:0071676	negative regulation of mononuclear cell migration	5/554	24/18722	0.000593849	0.00630043	0.0043597	IL27RA/CCN3/APOD/DUSP1/CCL2	5
BP	GO:0070167	regulation of biomineral tissue development	10/554	97/18722	0.000593939	0.00630043	0.0043597	PTN/OSR1/GAS6/S1PR1/CCN1/LTF/TMEM119/SRGN/CEBPB/MGP	10
BP	GO:0002691	regulation of cellular extravasation	6/554	36/18722	0.000597568	0.00630043	0.0043597	CCL21/SELP/IL27RA/CCL28/ICAM1/CXCL12	6
BP	GO:0051385	response to mineralocorticoid	6/554	36/18722	0.000597568	0.00630043	0.0043597	EDN1/FOSB/CCN2/CYBA/FOS/MAOB	6
BP	GO:0001767	establishment of lymphocyte polarity	4/554	14/18722	0.000599294	0.00630043	0.0043597	GSN/CCL21/CCL19/CCR7	4
BP	GO:0001771	immunological synapse formation	4/554	14/18722	0.000599294	0.00630043	0.0043597	CCL21/CCL19/LGALS3/CCR7	4
BP	GO:0003376	sphingosine-1-phosphate receptor signaling pathway	4/554	14/18722	0.000599294	0.00630043	0.0043597	S1PR1/S1PR4/SPNS2/SPHK1	4
BP	GO:0034616	response to laminar fluid shear stress	4/554	14/18722	0.000599294	0.00630043	0.0043597	KLF2/KLF4/ETS1/ASS1	4
BP	GO:0070141	response to UV-A	4/554	14/18722	0.000599294	0.00630043	0.0043597	MME/EGFR/MMP3/MMP2	4
BP	GO:0043547	positive regulation of GTPase activity	18/554	255/18722	0.00061798	0.00647428	0.00448	SFRP1/CCL14/CAV2/CCL21/CX3CL1/CCL19/S1PR1/EPHA2/RGMA/CCL17/NEDD9/CCL5/CCL22/CCR7/ICAM1/WNT11/CCL2/CXCL13	18
BP	GO:0051924	regulation of calcium ion transport	18/554	255/18722	0.00061798	0.00647428	0.00448	CX3CL1/CAV1/STAC2/GEM/MYLK/RRAD/CORO1A/LGALS3/PRNP/CYBA/CCL5/GRAMD2A/ICAM1/CXCL12/CCL2/S100A1/RAMP3/CXCL9	18
BP	GO:0051651	maintenance of location in cell	16/554	213/18722	0.000626954	0.00655664	0.00453699	GSN/CCL21/CX3CL1/CCL19/CAV1/FGF2/CORO1A/CYBA/LCN2/LCK/CCR7/SRGN/APOE/S100A9/S100A8/CXCL9	16
BP	GO:0060560	developmental growth involved in morphogenesis	17/554	234/18722	0.000628018	0.00655664	0.00453699	SFRP1/S1PR1/SPRY2/NDN/SPRY1/SEMA3G/RGMA/TNN/NRN1/TGFBR2/CXCL12/WNT11/TNC/APOE/SFRP2/AREG/ESR1	17
BP	GO:0042572	retinol metabolic process	7/554	50/18722	0.000633643	0.00659252	0.00456182	RBP4/ADH1B/LIPE/AKR1C3/ALDH1A1/DGAT2/CYP1B1	7
BP	GO:0050873	brown fat cell differentiation	7/554	50/18722	0.000633643	0.00659252	0.00456182	LAMB3/LEP/FABP4/ADIPOQ/RGS2/PIM1/CEBPB	7
BP	GO:0045453	bone resorption	8/554	65/18722	0.000640107	0.00663684	0.00459249	S1PR1/IL6/RAC2/EGFR/TF/TMEM119/PDK4/TNFAIP3	8
BP	GO:0048645	animal organ formation	8/554	65/18722	0.000640107	0.00663684	0.00459249	TP63/SOX17/FGF2/SPRY1/FOLR1/TGFBR2/PIM1/WNT11	8
BP	GO:0031349	positive regulation of defense response	19/554	278/18722	0.000654375	0.00677312	0.00468679	IL33/CX3CL1/FABP4/C3/KLK5/IL6/LPL/KLK7/IFI16/EGFR/CYBA/ETS1/CCL5/CCR7/CEBPB/PLA2G2A/PYCARD/S100A9/S100A8	19
BP	GO:0002263	cell activation involved in immune response	19/554	279/18722	0.000683371	0.00706111	0.00488607	CCL19/CD1C/PTGDS/MFNG/ITM2A/ANXA1/IL27RA/IL6/IL4R/ANXA3/RELB/KIT/RAC2/CORO1A/LGALS3/GPR183/ICAM1/CD74/PYCARD	19
BP	GO:0032570	response to progesterone	6/554	37/18722	0.000695612	0.00712782	0.00493223	CAV1/PTN/FOSB/FOS/OXTR/TXNIP	6
BP	GO:0045730	respiratory burst	6/554	37/18722	0.000695612	0.00712782	0.00493223	IGHA2/IGHA1/JCHAIN/RAC2/CD52/CYBA	6
BP	GO:0090218	positive regulation of lipid kinase activity	6/554	37/18722	0.000695612	0.00712782	0.00493223	CCL21/CCL19/FGF2/KIT/CCR7/EEF1A2	6
BP	GO:0008630	intrinsic apoptotic signaling pathway in response to DNA damage	10/554	99/18722	0.00069811	0.00712782	0.00493223	TP63/TNFRSF1B/EPHA2/IFI16/PHLDA3/CXCL12/SFN/CD74/PYCARD/SFRP2	10
BP	GO:0030838	positive regulation of actin filament polymerization	10/554	99/18722	0.00069811	0.00712782	0.00493223	GSN/CCL21/LMOD1/CDC42EP5/GMFG/CORO1A/CDC42EP1/CCR7/ICAM1/PYCARD	10
BP	GO:0033209	tumor necrosis factor-mediated signaling pathway	10/554	99/18722	0.00069811	0.00712782	0.00493223	ADIPOQ/GAS6/TNFRSF1B/GSTP1/CCDC3/TNFAIP3/SPHK1/BIRC3/PYCARD/PYDC1	10
BP	GO:0110149	regulation of biomineralization	10/554	99/18722	0.00069811	0.00712782	0.00493223	PTN/OSR1/GAS6/S1PR1/CCN1/LTF/TMEM119/SRGN/CEBPB/MGP	10
BP	GO:0006636	unsaturated fatty acid biosynthetic process	7/554	51/18722	0.000716001	0.00729812	0.00505007	PTGDS/ANXA1/EDN1/AKR1C3/CD74/SCD/FADS2	7
BP	GO:0003094	glomerular filtration	5/554	25/18722	0.00072441	0.00732691	0.00506999	IGHA2/IGHA1/JCHAIN/GAS6/CYBA	5
BP	GO:0060740	prostate gland epithelium morphogenesis	5/554	25/18722	0.00072441	0.00732691	0.00506999	SFRP1/TP63/TNC/FOXA1/ESR1	5
BP	GO:0061436	establishment of skin barrier	5/554	25/18722	0.00072441	0.00732691	0.00506999	TP63/MET/KRT16/SFN/CLDN1	5
BP	GO:1901623	regulation of lymphocyte chemotaxis	5/554	25/18722	0.00072441	0.00732691	0.00506999	CCL21/CCL5/CCL2/CXCL13/S100A7	5
BP	GO:0003158	endothelium development	12/554	136/18722	0.000727339	0.00732691	0.00506999	CLDN5/SOX17/PTN/ID1/S1PR1/MET/SOX18/PECAM1/COL18A1/LCN2/ICAM1/CLDN1	12
BP	GO:0007272	ensheathment of neurons	12/554	136/18722	0.000727339	0.00732691	0.00506999	CLDN11/S100B/CLDN5/PTN/ITGB4/JAM2/TNFRSF1B/EGR2/KLK6/CST7/NTRK2/KLK8	12
BP	GO:0008366	axon ensheathment	12/554	136/18722	0.000727339	0.00732691	0.00506999	CLDN11/S100B/CLDN5/PTN/ITGB4/JAM2/TNFRSF1B/EGR2/KLK6/CST7/NTRK2/KLK8	12
BP	GO:0046545	development of primary female sexual characteristics	10/554	100/18722	0.000755584	0.00759873	0.00525809	SFRP1/LEP/ADAMTS1/PTX3/KIT/FOXC1/CEBPB/ICAM1/FST/ESR1	10
BP	GO:0045446	endothelial cell differentiation	11/554	118/18722	0.000758596	0.0076163	0.00527024	CLDN5/SOX17/PTN/ID1/S1PR1/MET/SOX18/PECAM1/COL18A1/ICAM1/CLDN1	11
BP	GO:0050886	endocrine process	9/554	83/18722	0.000765698	0.00766788	0.00530594	LEP/SERPINF2/EDN1/C1QTNF1/CTSG/EDN3/MME/CYBA/OXTR	9
BP	GO:0008154	actin polymerization or depolymerization	16/554	217/18722	0.000766279	0.00766788	0.00530594	GSN/CCL21/LMOD1/FAM107A/CDC42EP5/GMFG/ELN/HCLS1/CORO1A/CDC42EP1/COTL1/CCR7/ICAM1/CXCL12/ARHGAP40/PYCARD	16
BP	GO:0043534	blood vessel endothelial cell migration	14/554	176/18722	0.000770519	0.00769753	0.00532645	ID1/ANXA1/RHOJ/FGF2/MMRN2/EPHA2/CLEC14A/MEOX2/SOX18/KLF4/ETS1/NR4A1/EGR3/APOE	14
BP	GO:0030879	mammary gland development	12/554	137/18722	0.000776264	0.00772928	0.00534842	CAV1/FGF2/EPHA2/CDO1/HOXA5/TGFBR2/OXTR/CEBPB/SOSTDC1/PRLR/AREG/ESR1	12
BP	GO:0090090	negative regulation of canonical Wnt signaling pathway	12/554	137/18722	0.000776264	0.00772928	0.00534842	SFRP1/CAV1/SOX17/TMEM88/IGFBP6/EGR1/TNN/SOSTDC1/WNT11/FRZB/APOE/SFRP2	12
BP	GO:0035914	skeletal muscle cell differentiation	8/554	67/18722	0.000785612	0.00780945	0.00540389	S100B/EGR1/EGR2/FOS/NR4A1/KLF5/ATF3/BTG2	8
BP	GO:0010952	positive regulation of peptidase activity	15/554	197/18722	0.000797959	0.00785677	0.00543664	NGFR/GSN/VSIR/CAV1/CCN1/PCOLCE2/F3/IFI16/CCN2/LCK/FBLN1/PYCARD/SFRP2/S100A9/S100A8	15
BP	GO:0002468	dendritic cell antigen processing and presentation	4/554	15/18722	0.000798198	0.00785677	0.00543664	CCL21/CCL19/CCR7/CD74	4
BP	GO:0010820	positive regulation of T cell chemotaxis	4/554	15/18722	0.000798198	0.00785677	0.00543664	CCL21/CCL5/CXCL13/S100A7	4
BP	GO:0010832	negative regulation of myotube differentiation	4/554	15/18722	0.000798198	0.00785677	0.00543664	CCN3/BHLHE41/TMEM119/CEACAM5	4
BP	GO:0060026	convergent extension	4/554	15/18722	0.000798198	0.00785677	0.00543664	SFRP1/WNT11/FRZB/SFRP2	4
BP	GO:1901741	positive regulation of myoblast fusion	4/554	15/18722	0.000798198	0.00785677	0.00543664	IL4R/EHD2/SCGB3A1/CXCL9	4
BP	GO:0006882	cellular zinc ion homeostasis	6/554	38/18722	0.00080565	0.00788797	0.00545823	MT1M/MT1X/LCK/MT1E/S100A9/S100A8	6
BP	GO:0048246	macrophage chemotaxis	6/554	38/18722	0.00080565	0.00788797	0.00545823	SAA1/IL34/LGALS3/CCL5/RARRES2/CCL2	6
BP	GO:0031103	axon regeneration	7/554	52/18722	0.000806605	0.00788797	0.00545823	PTN/RGMA/FOLR1/KLF4/APOD/KLK8/TNC	7
BP	GO:0043277	apoptotic cell clearance	7/554	52/18722	0.000806605	0.00788797	0.00545823	GAS6/C3/ANXA1/MFGE8/RAC2/CD36/CCL2	7
BP	GO:2000377	regulation of reactive oxygen species metabolic process	13/554	157/18722	0.000809803	0.00790241	0.00546822	CRYAB/FBLN5/LEP/GSTP1/AKR1C3/RAC2/EGFR/TGFBR2/CYBA/CD36/LCN2/MMP3/CYP1B1	13
BP	GO:0051146	striated muscle cell differentiation	19/554	283/18722	0.000810705	0.00790241	0.00546822	CAV2/MYH11/LMOD1/EDN1/JAM2/CCN3/PI16/IL4R/BHLHE41/RCAN1/RGS2/EHD2/TMEM119/FZD7/KLF5/SCGB3A1/IGF2/CEACAM5/CXCL9	19
BP	GO:0030282	bone mineralization	11/554	119/18722	0.00081407	0.00792239	0.00548204	PTN/LEP/OSR1/S1PR1/CCN1/LTF/CLEC3B/TMEM119/SRGN/WNT11/MGP	11
BP	GO:0098869	cellular oxidant detoxification	10/554	101/18722	0.000816898	0.00793709	0.00549222	SOD3/GPX3/FBLN5/CYGB/GSTP1/CD36/HBB/APOE/GSTA1/S100A9	10
BP	GO:0071503	response to heparin	3/554	7/18722	0.000825203	0.00797917	0.00552134	SFRP1/GPIHBP1/EGR1	3
BP	GO:0072201	negative regulation of mesenchymal cell proliferation	3/554	7/18722	0.000825203	0.00797917	0.00552134	PTN/WNT11/NFIB	3
BP	GO:1903348	positive regulation of bicellular tight junction assembly	3/554	7/18722	0.000825203	0.00797917	0.00552134	CLDN5/EPHA2/CLDN1	3
BP	GO:0055076	transition metal ion homeostasis	12/554	138/18722	0.000827909	0.00799251	0.00553057	MT1M/MT1X/SCARA5/SLC25A37/LTF/PRNP/TF/LCN2/LCK/MT1E/S100A9/S100A8	12
BP	GO:0035265	organ growth	14/554	178/18722	0.000860742	0.00816202	0.00564786	RBP4/LEP/S1PR1/SPRY2/EDN1/FGF2/PI16/YBX3/RGS2/TGFBR2/PIM1/FOXC1/IGF2/ESR1	14
BP	GO:0051148	negative regulation of muscle cell differentiation	8/554	68/18722	0.000867722	0.00816202	0.00564786	CCN3/PI16/BHLHE41/RGS2/TMEM119/FZD7/IGF2/CEACAM5	8
BP	GO:0001712	ectodermal cell fate commitment	2/554	2/18722	0.000874085	0.00816202	0.00564786	ETS2/FZD7	2
BP	GO:0001868	regulation of complement activation, lectin pathway	2/554	2/18722	0.000874085	0.00816202	0.00564786	A2M/SERPING1	2
BP	GO:0001869	negative regulation of complement activation, lectin pathway	2/554	2/18722	0.000874085	0.00816202	0.00564786	A2M/SERPING1	2
BP	GO:0034439	lipoprotein lipid oxidation	2/554	2/18722	0.000874085	0.00816202	0.00564786	LEP/APOD	2
BP	GO:0034442	regulation of lipoprotein oxidation	2/554	2/18722	0.000874085	0.00816202	0.00564786	LEP/APOD	2
BP	GO:0038111	interleukin-7-mediated signaling pathway	2/554	2/18722	0.000874085	0.00816202	0.00564786	IL7R/IL2RG	2
BP	GO:0042160	lipoprotein modification	2/554	2/18722	0.000874085	0.00816202	0.00564786	LEP/APOD	2
BP	GO:0042161	lipoprotein oxidation	2/554	2/18722	0.000874085	0.00816202	0.00564786	LEP/APOD	2
BP	GO:0060587	regulation of lipoprotein lipid oxidation	2/554	2/18722	0.000874085	0.00816202	0.00564786	LEP/APOD	2
BP	GO:0070488	neutrophil aggregation	2/554	2/18722	0.000874085	0.00816202	0.00564786	S100A9/S100A8	2
BP	GO:0070543	response to linoleic acid	2/554	2/18722	0.000874085	0.00816202	0.00564786	ADIPOQ/CD36	2
BP	GO:0071231	cellular response to folic acid	2/554	2/18722	0.000874085	0.00816202	0.00564786	FOLR1/FOLR2	2
BP	GO:0097018	renal albumin absorption	2/554	2/18722	0.000874085	0.00816202	0.00564786	ADIPOQ/GAS6	2
BP	GO:2000040	regulation of planar cell polarity pathway involved in axis elongation	2/554	2/18722	0.000874085	0.00816202	0.00564786	SFRP1/SFRP2	2
BP	GO:2000041	negative regulation of planar cell polarity pathway involved in axis elongation	2/554	2/18722	0.000874085	0.00816202	0.00564786	SFRP1/SFRP2	2
BP	GO:2000532	regulation of renal albumin absorption	2/554	2/18722	0.000874085	0.00816202	0.00564786	ADIPOQ/GAS6	2
BP	GO:0032682	negative regulation of chemokine production	5/554	26/18722	0.000875276	0.00816202	0.00564786	IL6/EPHA2/GSTP1/KLF4/APOD	5
BP	GO:0033598	mammary gland epithelial cell proliferation	5/554	26/18722	0.000875276	0.00816202	0.00564786	EPHA2/HOXA5/CEBPB/AREG/ESR1	5
BP	GO:0042634	regulation of hair cycle	5/554	26/18722	0.000875276	0.00816202	0.00564786	KRT17/NGFR/CDH3/PER1/FST	5
BP	GO:0097205	renal filtration	5/554	26/18722	0.000875276	0.00816202	0.00564786	IGHA2/IGHA1/JCHAIN/GAS6/CYBA	5
BP	GO:0032677	regulation of interleukin-8 production	10/554	102/18722	0.000882243	0.00820159	0.00567525	LEP/ADIPOQ/CHI3L1/ANXA1/IL6/F3/KLF4/CD2/CD74/PYCARD	10
BP	GO:0035710	CD4-positive, alpha-beta T cell activation	10/554	102/18722	0.000882243	0.00820159	0.00567525	VSIR/CCL19/ANXA1/IL6/IL4R/RELB/RUNX3/TGFBR2/SOCS1/GPR183	10
BP	GO:1904019	epithelial cell apoptotic process	11/554	121/18722	0.000935134	0.00867989	0.00600621	GSN/ECSCR/GAS6/ZFP36/IL6/ANGPTL4/AKR1C3/TGFBR2/TNFAIP3/ICAM1/CCL2	11
BP	GO:0032637	interleukin-8 production	10/554	103/18722	0.000951818	0.0087941	0.00608524	LEP/ADIPOQ/CHI3L1/ANXA1/IL6/F3/KLF4/CD2/CD74/PYCARD	10
BP	GO:0032760	positive regulation of tumor necrosis factor production	10/554	103/18722	0.000951818	0.0087941	0.00608524	IL33/CCL19/LEP/IL6/LPL/CYBA/CD36/SPON2/CD2/PYCARD	10
BP	GO:0046425	regulation of receptor signaling pathway via JAK-STAT	10/554	103/18722	0.000951818	0.0087941	0.00608524	CAV1/LEP/SOCS3/LIF/IL6/KIT/CCL5/SOCS1/PRLR/CYP1B1	10
BP	GO:0060193	positive regulation of lipase activity	8/554	69/18722	0.000956575	0.00882451	0.00610629	GPIHBP1/CCN1/FGF2/S1PR4/KIT/EGFR/CCL5/ESR1	8
BP	GO:0060761	negative regulation of response to cytokine stimulus	9/554	86/18722	0.000990823	0.00912648	0.00631524	CAV1/ADIPOQ/GAS6/IL6/GSTP1/CCDC3/KLF4/CCL5/PYDC1	9
BP	GO:0097193	intrinsic apoptotic signaling pathway	19/554	288/18722	0.00099811	0.0091784	0.00635117	TP63/CAV1/TNFRSF1B/EPHA2/PPP1R15A/YBX3/IFI16/LGALS12/LCK/PHLDA3/CEBPB/CXCL12/SFN/CD74/PYCARD/SFRP2/CYP1B1/S100A9/S100A8	19
BP	GO:0030183	B cell differentiation	12/554	141/18722	0.00100035	0.0091784	0.00635117	SFRP1/MFNG/ITM2A/CD79B/ZFP36L2/IL6/TPD52/KIT/CMTM7/CD79A/CD27/GPR183	12
BP	GO:0051928	positive regulation of calcium ion transport	11/554	122/18722	0.00100103	0.0091784	0.00635117	CX3CL1/CAV1/STAC2/MYLK/LGALS3/CCL5/CXCL12/CCL2/S100A1/RAMP3/CXCL9	11
BP	GO:0097696	receptor signaling pathway via STAT	14/554	181/18722	0.00101269	0.00927116	0.00641535	CAV1/LEP/SOCS3/LIF/IL6/KIT/HCLS1/IL7R/CCL5/SOCS1/CRLF1/CCL2/PRLR/CYP1B1	14
BP	GO:1904062	regulation of cation transmembrane transport	22/554	357/18722	0.00101938	0.00931831	0.00644798	KCNMB1/CX3CL1/CAV1/SCN4B/OSR1/KCNIP2/STAC2/GEM/FHL1/RRAD/EDN3/RGS2/CORO1A/PRNP/CYBA/LCN2/FXYD5/CCL2/KCNN4/S100A1/RAMP3/CXCL9	22
BP	GO:0010819	regulation of T cell chemotaxis	4/554	16/18722	0.00103952	0.0094308	0.00652582	CCL21/CCL5/CXCL13/S100A7	4
BP	GO:0033631	cell-cell adhesion mediated by integrin	4/554	16/18722	0.00103952	0.0094308	0.00652582	CD3E/CCL5/NPNT/CXCL13	4
BP	GO:0051238	sequestering of metal ion	4/554	16/18722	0.00103952	0.0094308	0.00652582	LCN2/S100A9/S100A8/S100A7	4
BP	GO:0090520	sphingolipid mediated signaling pathway	4/554	16/18722	0.00103952	0.0094308	0.00652582	S1PR1/S1PR4/SPNS2/SPHK1	4
BP	GO:1903236	regulation of leukocyte tethering or rolling	4/554	16/18722	0.00103952	0.0094308	0.00652582	CCL21/SELP/CCL28/CXCL12	4
BP	GO:0033561	regulation of water loss via skin	5/554	27/18722	0.00104834	0.00948225	0.00656142	TP63/MET/KRT16/SFN/CLDN1	5
BP	GO:0033688	regulation of osteoblast proliferation	5/554	27/18722	0.00104834	0.00948225	0.00656142	SFRP1/CCN1/LTF/TNN/TMEM119	5
BP	GO:0055069	zinc ion homeostasis	6/554	40/18722	0.00106559	0.00962383	0.00665939	MT1M/MT1X/LCK/MT1E/S100A9/S100A8	6
BP	GO:0032535	regulation of cellular component size	23/554	382/18722	0.00107905	0.00973083	0.00673343	GSN/CCL21/AQP1/LMOD1/EDN1/CDC42EP5/PPP1R15A/GMFG/ELN/SEMA3G/RGMA/HCLS1/CORO1A/IL7R/CDC42EP1/COTL1/CCR7/ICAM1/CXCL12/KCNN4/ARHGAP40/APOE/PYCARD	23
BP	GO:0071375	cellular response to peptide hormone stimulus	19/554	290/18722	0.00108284	0.00975042	0.00674699	CAV2/CAV1/TRARG1/LEP/ADIPOQ/SOCS3/EDN1/LPL/GSTP1/SORBS1/CYBA/PDK4/NR4A1/SOCS1/RARRES2/CDC6/ASS1/IGF2/MZB1	19
BP	GO:0003007	heart morphogenesis	17/554	246/18722	0.00109445	0.00984023	0.00680913	RBP4/CLDN5/SOX17/S1PR1/ADAMTS1/CCN1/ELN/SPRY1/SOX18/FOLR1/TGFBR2/PIM1/FOXC1/WNT11/VANGL2/SFRP2/COL11A1	17
BP	GO:0032231	regulation of actin filament bundle assembly	10/554	105/18722	0.00110448	0.00991563	0.00686131	SFRP1/CX3CL1/ID1/SERPINF2/SYNPO/S1PR1/MET/CCN2/TACSTD2/WNT11	10
BP	GO:0032722	positive regulation of chemokine production	8/554	71/18722	0.0011561	0.0103636	0.0071713	IL33/ADIPOQ/IL6/LPL/IL4R/EGR1/CD74/PYCARD	8
BP	GO:0010632	regulation of epithelial cell migration	19/554	292/18722	0.00117365	0.0105053	0.00726932	PTN/ENPP2/ANXA1/EDN1/RHOJ/FGF2/MMRN2/EPHA2/MET/ANXA3/MEOX2/KLF4/TGFBR2/GLIPR2/TACSTD2/ETS1/LCN2/APOE/CXCL13	19
BP	GO:0046620	regulation of organ growth	10/554	106/18722	0.00118799	0.0106179	0.00734726	RBP4/EDN1/FGF2/PI16/YBX3/RGS2/TGFBR2/PIM1/FOXC1/IGF2	10
BP	GO:0042326	negative regulation of phosphorylation	23/554	385/18722	0.00119654	0.0106785	0.00738918	SFRP1/CAV1/FABP4/ADIPOQ/CDKN1C/SPRY2/RASIP1/SOCS3/GSTP1/SPRY1/RGS2/PRNP/SOCS1/TNFAIP3/EMILIN1/DUSP1/FBLN1/SFN/APOE/PYCARD/SFRP2/PYDC1/PPP1R1B	23
BP	GO:0014065	phosphatidylinositol 3-kinase signaling	12/554	144/18722	0.00120166	0.0106924	0.00739884	SELP/LEP/EDN1/FGF2/HCST/NOP53/KIT/KLF4/HCLS1/EGFR/CCL5/NTRK2	12
BP	GO:0046718	viral entry into host cell	12/554	144/18722	0.00120166	0.0106924	0.00739884	GSN/CAV2/CAV1/GAS6/EPHA2/PTX3/EGFR/ICAM1/CD74/WWP1/CLDN1/ANPEP	12
BP	GO:0050680	negative regulation of epithelial cell proliferation	13/554	164/18722	0.00121143	0.0107635	0.00744804	NGFR/SFRP1/LIMS2/CAV2/CAV1/PTN/CDKN1C/RUNX3/SFN/CCL2/NFIB/APOE/SFRP2	13
BP	GO:0001945	lymph vessel development	5/554	28/18722	0.00124553	0.0110177	0.00762391	EPHA2/CLEC14A/SOX18/LGALS12/FOXC1	5
BP	GO:0010818	T cell chemotaxis	5/554	28/18722	0.00124553	0.0110177	0.00762391	CCL21/CCL5/GPR183/CXCL13/S100A7	5
BP	GO:0071280	cellular response to copper ion	5/554	28/18722	0.00124553	0.0110177	0.00762391	MT1M/MT1X/AQP1/PRNP/MT1E	5
BP	GO:0010518	positive regulation of phospholipase activity	7/554	56/18722	0.00126319	0.0111575	0.00772068	CCN1/FGF2/S1PR4/KIT/EGFR/CCL5/ESR1	7
BP	GO:1903557	positive regulation of tumor necrosis factor superfamily cytokine production	10/554	107/18722	0.00127659	0.0112594	0.00779115	IL33/CCL19/LEP/IL6/LPL/CYBA/CD36/SPON2/CD2/PYCARD	10
BP	GO:0035425	autocrine signaling	3/554	8/18722	0.00129135	0.0113233	0.00783535	CX3CL1/S100A9/S100A8	3
BP	GO:0035754	B cell chemotaxis	3/554	8/18722	0.00129135	0.0113233	0.00783535	GAS6/CH25H/CXCL13	3
BP	GO:0071499	cellular response to laminar fluid shear stress	3/554	8/18722	0.00129135	0.0113233	0.00783535	KLF2/KLF4/ASS1	3
BP	GO:1902746	regulation of lens fiber cell differentiation	3/554	8/18722	0.00129135	0.0113233	0.00783535	SPRY2/FGF2/SPRY1	3
BP	GO:0032874	positive regulation of stress-activated MAPK cascade	11/554	126/18722	0.00130416	0.011419	0.0079016	CCL21/CCL19/LEP/SERPINF2/IGFBP6/CCN2/CD27/FZD7/SPHK1/CCR7/PYCARD	11
BP	GO:0007379	segment specification	4/554	17/18722	0.00132779	0.0115254	0.00797522	MEOX1/IRX1/OSR1/MEOX2	4
BP	GO:0033623	regulation of integrin activation	4/554	17/18722	0.00132779	0.0115254	0.00797522	SELP/RASIP1/FBLIM1/CXCL13	4
BP	GO:0051797	regulation of hair follicle development	4/554	17/18722	0.00132779	0.0115254	0.00797522	KRT17/NGFR/CDH3/FST	4
BP	GO:0060263	regulation of respiratory burst	4/554	17/18722	0.00132779	0.0115254	0.00797522	IGHA2/IGHA1/JCHAIN/RAC2	4
BP	GO:0090136	epithelial cell-cell adhesion	4/554	17/18722	0.00132779	0.0115254	0.00797522	CCN3/KIT/THBS4/CYP1B1	4
BP	GO:2000811	negative regulation of anoikis	4/554	17/18722	0.00132779	0.0115254	0.00797522	CAV1/PDK4/NTRK2/CEACAM5	4
BP	GO:0033138	positive regulation of peptidyl-serine phosphorylation	10/554	108/18722	0.00137049	0.0118789	0.00821984	CAV1/GAS6/SPRY2/LIF/IL6/HCLS1/EGFR/NTRK2/RAMP3/SFRP2	10
BP	GO:0002695	negative regulation of leukocyte activation	14/554	187/18722	0.00138482	0.0119569	0.00827379	SFRP1/VSIR/CX3CL1/ANXA1/IL4R/RUNX3/LGALS3/PRNP/SOCS1/TNFAIP3/CST7/VTCN1/CEBPB/CD74	14
BP	GO:0030574	collagen catabolic process	6/554	42/18722	0.00138544	0.0119569	0.00827379	VSIR/MMP7/KLK6/MMP3/MRC2/MMP2	6
BP	GO:0032965	regulation of collagen biosynthetic process	6/554	42/18722	0.00138544	0.0119569	0.00827379	SERPINF2/IL6/CYGB/VIM/CCN2/EMILIN1	6
BP	GO:0010883	regulation of lipid storage	7/554	57/18722	0.00140397	0.0120994	0.00837241	LEP/CIDEA/C3/IL6/LPL/CES1/CD36	7
BP	GO:0090257	regulation of muscle system process	17/554	252/18722	0.00142139	0.0122321	0.00846425	CNN1/HSPB6/CAV1/EDN1/TNFRSF1B/MYL9/PI16/KIT/RGS2/KLF4/CCN2/TNNI2/NR4A1/OXTR/SPHK1/FBXO32/NPNT	17
BP	GO:0030308	negative regulation of cell growth	14/554	188/18722	0.00145676	0.0125186	0.00866246	SFRP1/CRYAB/NPR1/SOX17/CCN3/PI16/FHL1/SEMA3G/RGMA/RGS2/WNT11/SCGB3A1/FRZB/SFRP2	14
BP	GO:0001773	myeloid dendritic cell activation	5/554	29/18722	0.00146883	0.0125329	0.00867238	RELB/TGFBR2/CD2/PYCARD/UBD	5
BP	GO:0031069	hair follicle morphogenesis	5/554	29/18722	0.00146883	0.0125329	0.00867238	KRT17/NGFR/TP63/SOSTDC1/FST	5
BP	GO:0060441	epithelial tube branching involved in lung morphogenesis	5/554	29/18722	0.00146883	0.0125329	0.00867238	SPRY2/SPRY1/HOXA5/TNC/FOXA1	5
BP	GO:0071549	cellular response to dexamethasone stimulus	5/554	29/18722	0.00146883	0.0125329	0.00867238	AQP1/EGFR/ICAM1/FBXO32/ASS1	5
BP	GO:0090025	regulation of monocyte chemotaxis	5/554	29/18722	0.00146883	0.0125329	0.00867238	CCN3/CCL5/DUSP1/CXCL12/S100A7	5
BP	GO:0070304	positive regulation of stress-activated protein kinase signaling cascade	11/554	128/18722	0.00148186	0.0126183	0.00873149	CCL21/CCL19/LEP/SERPINF2/IGFBP6/CCN2/CD27/FZD7/SPHK1/CCR7/PYCARD	11
BP	GO:0001657	ureteric bud development	9/554	91/18722	0.00148303	0.0126183	0.00873149	SFRP1/OSR1/FGF2/SPRY1/TACSTD2/FOXC1/WNT11/CRLF1/NPNT	9
BP	GO:0045637	regulation of myeloid cell differentiation	15/554	210/18722	0.0015194	0.0129095	0.008933	SFRP1/IL34/ADIPOQ/LIF/ZFP36/LTF/RAB7B/HOXA5/JUN/HCLS1/ETS1/FOS/CEBPB/CD74/H4C8	15
BP	GO:0045936	negative regulation of phosphate metabolic process	25/554	441/18722	0.0015512	0.0131612	0.00910711	SFRP1/CAV1/FABP4/ADIPOQ/CDKN1C/SPRY2/RASIP1/SOCS3/PPP1R15A/GSTP1/SPRY1/RGS2/LGALS3/PRNP/SOCS1/TNFAIP3/EMILIN1/DUSP1/FBLN1/SFN/APOE/PYCARD/SFRP2/PYDC1/PPP1R1B	25
BP	GO:0042743	hydrogen peroxide metabolic process	7/554	58/18722	0.00155669	0.0131892	0.00912651	GPX3/RAC2/EGFR/CYBA/MMP3/HBB/MAOB	7
BP	GO:0014002	astrocyte development	6/554	43/18722	0.00157048	0.0132687	0.00918154	IL6/VIM/EGFR/C1QA/S100A9/S100A8	6
BP	GO:0060443	mammary gland morphogenesis	6/554	43/18722	0.00157048	0.0132687	0.00918154	CAV1/EPHA2/TGFBR2/SOSTDC1/AREG/ESR1	6
BP	GO:1905954	positive regulation of lipid localization	10/554	110/18722	0.00157517	0.0132897	0.00919603	CAV1/CIDEA/ADIPOQ/C3/EDN1/C1QTNF1/LPL/CES1/CD36/APOE	10
BP	GO:0006937	regulation of muscle contraction	13/554	169/18722	0.00159021	0.0133978	0.00927084	CNN1/HSPB6/CAV1/EDN1/MYL9/KIT/RGS2/CCN2/TNNI2/NR4A1/OXTR/SPHK1/NPNT	13
BP	GO:0010563	negative regulation of phosphorus metabolic process	25/554	442/18722	0.00159982	0.0134385	0.00929901	SFRP1/CAV1/FABP4/ADIPOQ/CDKN1C/SPRY2/RASIP1/SOCS3/PPP1R15A/GSTP1/SPRY1/RGS2/LGALS3/PRNP/SOCS1/TNFAIP3/EMILIN1/DUSP1/FBLN1/SFN/APOE/PYCARD/SFRP2/PYDC1/PPP1R1B	25
BP	GO:0072163	mesonephric epithelium development	9/554	92/18722	0.00160173	0.0134385	0.00929901	SFRP1/OSR1/FGF2/SPRY1/TACSTD2/FOXC1/WNT11/CRLF1/NPNT	9
BP	GO:0072164	mesonephric tubule development	9/554	92/18722	0.00160173	0.0134385	0.00929901	SFRP1/OSR1/FGF2/SPRY1/TACSTD2/FOXC1/WNT11/CRLF1/NPNT	9
BP	GO:0033077	T cell differentiation in thymus	8/554	75/18722	0.00165421	0.013821	0.00956372	ZFP36L2/CD3D/IL7R/CD3E/FZD7/CCR7/EGR3/CD74	8
BP	GO:0034121	regulation of toll-like receptor signaling pathway	8/554	75/18722	0.00165421	0.013821	0.00956372	CAV1/LTF/RAB7B/CYBA/CD36/TNFAIP3/BIRC3/ESR1	8
BP	GO:0043627	response to estrogen	8/554	75/18722	0.00165421	0.013821	0.00956372	SFRP1/CAV1/ARID5A/IL4R/SLC34A2/TGFBR2/CITED4/ESR1	8
BP	GO:0001946	lymphangiogenesis	4/554	18/18722	0.00166755	0.0138365	0.00957445	EPHA2/CLEC14A/SOX18/FOXC1	4
BP	GO:0006957	complement activation, alternative pathway	4/554	18/18722	0.00166755	0.0138365	0.00957445	C7/C3/CFD/CFB	4
BP	GO:0030728	ovulation	4/554	18/18722	0.00166755	0.0138365	0.00957445	LEP/ADAMTS1/IL4R/RGS2	4
BP	GO:0031643	positive regulation of myelination	4/554	18/18722	0.00166755	0.0138365	0.00957445	S100B/TNFRSF1B/EGR2/CST7	4
BP	GO:0046851	negative regulation of bone remodeling	4/554	18/18722	0.00166755	0.0138365	0.00957445	SFRP1/IL6/TMEM119/TNFAIP3	4
BP	GO:0007259	receptor signaling pathway via JAK-STAT	13/554	170/18722	0.00167665	0.0138929	0.00961344	CAV1/LEP/SOCS3/LIF/IL6/KIT/HCLS1/CCL5/SOCS1/CRLF1/CCL2/PRLR/CYP1B1	13
BP	GO:0001938	positive regulation of endothelial cell proliferation	10/554	111/18722	0.00168642	0.0139547	0.00965622	CAV2/FGF2/F3/EGFL7/CYBA/NR4A1/EGR3/CXCL12/THBS4/IGF2	10
BP	GO:0061008	hepaticobiliary system development	12/554	150/18722	0.00170555	0.0140936	0.00975233	LIMS2/SOX17/PTN/ANXA1/IL6/MET/EGFR/TNFAIP3/CEBPB/ASS1/FRZB/CLDN1	12
BP	GO:0017145	stem cell division	5/554	30/18722	0.00172025	0.0141716	0.00980633	SOX17/ZFP36L2/KIT/FZD7/SFRP2	5
BP	GO:0070229	negative regulation of lymphocyte apoptotic process	5/554	30/18722	0.00172025	0.0141716	0.00980633	IL7R/CD27/CCL5/CD74/PIP	5
BP	GO:2000351	regulation of endothelial cell apoptotic process	7/554	59/18722	0.00172205	0.0141716	0.00980633	ECSCR/GAS6/ANGPTL4/AKR1C3/TNFAIP3/ICAM1/CCL2	7
BP	GO:0048469	cell maturation	13/554	171/18722	0.00176694	0.0145014	0.0100346	CCL21/CX3CL1/CCL19/KCNIP2/C3/KLF2/DEFB1/SOX18/HOXA5/C1QA/CNTNAP2/FOXA1/NTN4	13
BP	GO:0051048	negative regulation of secretion	13/554	171/18722	0.00176694	0.0145014	0.0100346	SFRP1/LEP/ADIPOQ/ANXA1/EDN1/LIF/TNFRSF1B/CCN3/NMB/OXTR/CD74/MAOB/APOE	13
BP	GO:0031295	T cell costimulation	6/554	44/18722	0.00177373	0.0145373	0.0100594	CCL21/CCL19/CAV1/CD3E/LCK/CCR7	6
BP	GO:0046683	response to organophosphorus	11/554	131/18722	0.00178518	0.0146114	0.0101106	GPD1/AQP1/ADIPOQ/CDO1/PER1/JUN/FOSB/FOS/DUSP1/ASS1/AREG	11
BP	GO:0021700	developmental maturation	18/554	280/18722	0.00178803	0.0146148	0.010113	CCL21/CX3CL1/CCL19/LEP/KCNIP2/S1PR1/C3/CDH3/LTF/KLF2/DEFB1/SOX18/HOXA5/C1QA/CNTNAP2/MMP2/FOXA1/NTN4	18
BP	GO:0032720	negative regulation of tumor necrosis factor production	8/554	76/18722	0.00180197	0.0146888	0.0101642	VSIR/CX3CL1/CIDEA/ADIPOQ/GAS6/IL27RA/GSTP1/TNFAIP3	8
BP	GO:2000379	positive regulation of reactive oxygen species metabolic process	8/554	76/18722	0.00180197	0.0146888	0.0101642	LEP/GSTP1/AKR1C3/EGFR/TGFBR2/CYBA/CD36/LCN2	8
BP	GO:0048762	mesenchymal cell differentiation	16/554	236/18722	0.00184339	0.0150062	0.0103838	SFRP1/OSR1/SPRY2/EDN1/IL6/EDN3/SPRY1/SEMA3G/FOLR1/TGFBR2/GLIPR2/FOXC1/WNT11/FRZB/SFRP2/FOXA1	16
BP	GO:0002042	cell migration involved in sprouting angiogenesis	9/554	94/18722	0.00186197	0.0150963	0.0104461	ANXA1/RHOJ/FGF2/MMRN2/CLEC14A/MEOX2/KLF4/NR4A1/EGR3	9
BP	GO:1903035	negative regulation of response to wounding	9/554	94/18722	0.00186197	0.0150963	0.0104461	PROS1/SERPINF2/EDN1/C1QTNF1/FGF2/SERPING1/RGMA/KLK8/APOE	9
BP	GO:1990830	cellular response to leukemia inhibitory factor	9/554	94/18722	0.00186197	0.0150963	0.0104461	SOX17/SPRY2/SOCS3/PCOLCE2/MRAS/SPOCK2/KLF4/KLF5/ICAM1	9
BP	GO:0035701	hematopoietic stem cell migration	3/554	9/18722	0.00189458	0.0152988	0.0105863	GAS6/JAM2/KIT	3
BP	GO:0060267	positive regulation of respiratory burst	3/554	9/18722	0.00189458	0.0152988	0.0105863	IGHA2/IGHA1/JCHAIN	3
BP	GO:1904238	pericyte cell differentiation	3/554	9/18722	0.00189458	0.0152988	0.0105863	OSR1/EPHA2/ACTA2	3
BP	GO:0031102	neuron projection regeneration	7/554	60/18722	0.00190073	0.015328	0.0106065	PTN/RGMA/FOLR1/KLF4/APOD/KLK8/TNC	7
BP	GO:0045927	positive regulation of growth	17/554	259/18722	0.00190366	0.0153311	0.0106086	KRT17/SFRP1/LEP/EDN1/FGF2/YBX3/EGFR/TGFBR2/PIM1/CYBA/SPHK1/CXCL12/SFN/SFRP2/IGF2/S100A9/S100A8	17
BP	GO:0002285	lymphocyte activation involved in immune response	14/554	194/18722	0.00195697	0.0157393	0.0108911	CCL19/CD1C/MFNG/ITM2A/ANXA1/IL27RA/IL6/IL4R/RELB/CORO1A/LGALS3/GPR183/ICAM1/CD74	14
BP	GO:0051091	positive regulation of DNA-binding transcription factor activity	17/554	260/18722	0.00198264	0.0159246	0.0110193	CX3CL1/CAV1/EDN1/IL6/ANXA3/LTF/RAB7B/KIT/HCLS1/CD36/SPHK1/ICAM1/PYCARD/FOXA1/S100A9/S100A8/ESR1	17
BP	GO:0042551	neuron maturation	6/554	45/18722	0.00199631	0.0159278	0.0110215	CX3CL1/KCNIP2/C3/C1QA/CNTNAP2/NTN4	6
BP	GO:0071364	cellular response to epidermal growth factor stimulus	6/554	45/18722	0.00199631	0.0159278	0.0110215	ID1/ZFP36L2/ZFP36/GSTP1/EGFR/FOXC1	6
BP	GO:0001516	prostaglandin biosynthetic process	5/554	31/18722	0.00200183	0.0159278	0.0110215	PTGDS/ANXA1/EDN1/AKR1C3/CD74	5
BP	GO:0002828	regulation of type 2 immune response	5/554	31/18722	0.00200183	0.0159278	0.0110215	ANXA1/IL27RA/IL6/IL4R/CD74	5
BP	GO:0045987	positive regulation of smooth muscle contraction	5/554	31/18722	0.00200183	0.0159278	0.0110215	EDN1/KIT/OXTR/SPHK1/NPNT	5
BP	GO:0046457	prostanoid biosynthetic process	5/554	31/18722	0.00200183	0.0159278	0.0110215	PTGDS/ANXA1/EDN1/AKR1C3/CD74	5
BP	GO:0060795	cell fate commitment involved in formation of primary germ layer	5/554	31/18722	0.00200183	0.0159278	0.0110215	SOX17/ETS2/KLF4/FZD7/SFRP2	5
BP	GO:1990823	response to leukemia inhibitory factor	9/554	95/18722	0.00200419	0.0159278	0.0110215	SOX17/SPRY2/SOCS3/PCOLCE2/MRAS/SPOCK2/KLF4/KLF5/ICAM1	9
BP	GO:0120254	olefinic compound metabolic process	12/554	153/18722	0.00201613	0.0160015	0.0110726	RBP4/ADH1B/PTGDS/LIPE/GSTP1/EGR1/AKR1C3/ALDH1A1/DGAT2/CYP1B1/GSTA1/FADS2	12
BP	GO:0002286	T cell activation involved in immune response	10/554	114/18722	0.00205889	0.0162472	0.0112426	CCL19/CD1C/ANXA1/IL6/IL4R/RELB/LGALS3/GPR183/ICAM1/CD74	10
BP	GO:0002523	leukocyte migration involved in inflammatory response	4/554	19/18722	0.00206327	0.0162472	0.0112426	CX3CL1/PTN/S100A9/S100A8	4
BP	GO:0070233	negative regulation of T cell apoptotic process	4/554	19/18722	0.00206327	0.0162472	0.0112426	IL7R/CD27/CCL5/PIP	4
BP	GO:0140131	positive regulation of lymphocyte chemotaxis	4/554	19/18722	0.00206327	0.0162472	0.0112426	CCL21/CCL5/CXCL13/S100A7	4
BP	GO:1901739	regulation of myoblast fusion	4/554	19/18722	0.00206327	0.0162472	0.0112426	IL4R/EHD2/SCGB3A1/CXCL9	4
BP	GO:1903978	regulation of microglial cell activation	4/554	19/18722	0.00206327	0.0162472	0.0112426	CX3CL1/IL6/CST7/SPHK1	4
BP	GO:0043030	regulation of macrophage activation	7/554	61/18722	0.00209345	0.0164634	0.0113921	IL33/CX3CL1/IL6/IL4R/CST7/SPHK1/CD74	7
BP	GO:0030500	regulation of bone mineralization	8/554	78/18722	0.00212863	0.0167182	0.0115685	PTN/OSR1/S1PR1/CCN1/LTF/TMEM119/SRGN/MGP	8
BP	GO:0042552	myelination	11/554	134/18722	0.00213733	0.0167647	0.0116006	S100B/CLDN5/PTN/ITGB4/JAM2/TNFRSF1B/EGR2/KLK6/CST7/NTRK2/KLK8	11
BP	GO:0001823	mesonephros development	9/554	96/18722	0.00215495	0.0168371	0.0116508	SFRP1/OSR1/FGF2/SPRY1/TACSTD2/FOXC1/WNT11/CRLF1/NPNT	9
BP	GO:0003073	regulation of systemic arterial blood pressure	9/554	96/18722	0.00215495	0.0168371	0.0116508	SERPINF2/GAS6/EDN1/CTSG/EDN3/MME/CYBA/OXTR/RARRES2	9
BP	GO:0055017	cardiac muscle tissue growth	9/554	96/18722	0.00215495	0.0168371	0.0116508	RBP4/S1PR1/EDN1/FGF2/PI16/RGS2/TGFBR2/PIM1/FOXC1	9
BP	GO:0052126	movement in host environment	13/554	175/18722	0.00216929	0.0169272	0.0117131	GSN/CAV2/CAV1/GAS6/EPHA2/PTX3/EGFR/ICAM1/CD74/WWP1/KRT6A/CLDN1/ANPEP	13
BP	GO:0030278	regulation of ossification	10/554	115/18722	0.00219682	0.0170977	0.0118311	SFRP1/PTN/OSR1/S1PR1/CCN1/LTF/EGR2/TMEM119/SRGN/MGP	10
BP	GO:0046916	cellular transition metal ion homeostasis	10/554	115/18722	0.00219682	0.0170977	0.0118311	MT1M/MT1X/SCARA5/PRNP/TF/LCN2/LCK/MT1E/S100A9/S100A8	10
BP	GO:2001233	regulation of apoptotic signaling pathway	21/554	356/18722	0.00223596	0.0173615	0.0120136	NGFR/SFRP1/TP63/G0S2/CX3CL1/CAV1/GSTP1/SRPX/YBX3/ITM2C/LGALS3/ATF3/TNFAIP3/LCK/ICAM1/CXCL12/CD74/PYCARD/SFRP2/S100A9/S100A8	21
BP	GO:0031294	lymphocyte costimulation	6/554	46/18722	0.00223936	0.0173615	0.0120136	CCL21/CCL19/CAV1/CD3E/LCK/CCR7	6
BP	GO:1900271	regulation of long-term synaptic potentiation	6/554	46/18722	0.00223936	0.0173615	0.0120136	PTN/FAM107A/MME/PRNP/CALB2/APOE	6
BP	GO:0050728	negative regulation of inflammatory response	13/554	176/18722	0.00228084	0.0176604	0.0122205	SAA1/CX3CL1/FNDC4/ADIPOQ/SOCS3/TNFRSF1B/ZFP36/CCN3/GSTP1/KLF4/TNFAIP3/CST7/APOE	13
BP	GO:0097191	extrinsic apoptotic signaling pathway	15/554	219/18722	0.0022887	0.0176985	0.0122468	SFRP1/G0S2/CX3CL1/CAV1/TNFRSF1B/GSTP1/SRPX/ITM2C/LGALS3/CD27/ATF3/TNFAIP3/ICAM1/PYCARD/SFRP2	15
BP	GO:0032835	glomerulus development	7/554	62/18722	0.00230092	0.0177475	0.0122807	OSR1/ADIPOQ/EGR1/PECAM1/ACTA2/FOXC1/PROM1	7
BP	GO:1903078	positive regulation of protein localization to plasma membrane	7/554	62/18722	0.00230092	0.0177475	0.0122807	STAC2/EPHA2/SORBS1/LGALS3/PRNP/EGFR/RAMP3	7
BP	GO:0014068	positive regulation of phosphatidylinositol 3-kinase signaling	8/554	79/18722	0.00230853	0.0177833	0.0123055	SELP/LEP/FGF2/HCST/KIT/HCLS1/CCL5/NTRK2	8
BP	GO:0019835	cytolysis	5/554	32/18722	0.00231563	0.0178153	0.0123276	C7/GZMM/PLA2G2A/GZMA/KRT6A	5
BP	GO:0033559	unsaturated fatty acid metabolic process	10/554	116/18722	0.00234208	0.0179958	0.0124525	PTGDS/ANXA1/EDN1/GSTP1/AKR1C3/CD74/SCD/CYP1B1/GSTA1/FADS2	10
BP	GO:0009314	response to radiation	25/554	456/18722	0.0024309	0.0186545	0.0129083	KRT14/SFRP1/CRYAB/PTN/AQP1/MFAP4/ANXA1/EGR1/KIT/PER1/JUN/IFI16/MME/EGFR/CYBA/LCN2/MMP3/FOS/DUSP1/ICAM1/CXCL12/SCARA3/MMP2/SFRP2/PPP1R1B	25
BP	GO:0002702	positive regulation of production of molecular mediator of immune response	10/554	117/18722	0.00249496	0.0190949	0.0132131	RBP4/KLK5/IL6/KLK7/IL4R/KIT/CD36/SPON2/CD74/MZB1	10
BP	GO:0071229	cellular response to acid chemical	8/554	80/18722	0.00250013	0.0190949	0.0132131	COL16A1/KLF2/CYBA/SOCS1/NTRK2/CEBPB/ASS1/MMP2	8
BP	GO:0051250	negative regulation of lymphocyte activation	12/554	157/18722	0.00250082	0.0190949	0.0132131	SFRP1/VSIR/ANXA1/IL4R/RUNX3/LGALS3/PRNP/SOCS1/TNFAIP3/VTCN1/CEBPB/CD74	12
BP	GO:0034104	negative regulation of tissue remodeling	4/554	20/18722	0.00251937	0.0190949	0.0132131	SFRP1/IL6/TMEM119/TNFAIP3	4
BP	GO:0045063	T-helper 1 cell differentiation	4/554	20/18722	0.00251937	0.0190949	0.0132131	CCL19/ANXA1/IL4R/RELB	4
BP	GO:0071731	response to nitric oxide	4/554	20/18722	0.00251937	0.0190949	0.0132131	CCL19/AQP1/MMP3/CCR7	4
BP	GO:0032233	positive regulation of actin filament bundle assembly	7/554	63/18722	0.00252389	0.0190949	0.0132131	SFRP1/CX3CL1/ID1/SERPINF2/SYNPO/CCN2/WNT11	7
BP	GO:0034754	cellular hormone metabolic process	11/554	137/18722	0.00254389	0.0190949	0.0132131	RBP4/ADH1B/LIPE/EGR1/AKR1C3/SCPEP1/ALDH1A1/DGAT2/CYP1B1/RBP1/ESR1	11
BP	GO:0042692	muscle cell differentiation	22/554	384/18722	0.00254645	0.0190949	0.0132131	CAV2/MYH11/LMOD1/EDN1/JAM2/CCN3/PI16/IL4R/BHLHE41/RCAN1/KIT/RGS2/EHD2/TMEM119/FZD7/KLF5/SCGB3A1/OLFM2/IGF2/NPNT/CEACAM5/CXCL9	22
BP	GO:0001705	ectoderm formation	2/554	3/18722	0.00257071	0.0190949	0.0132131	ETS2/FZD7	2
BP	GO:0010481	epidermal cell division	2/554	3/18722	0.00257071	0.0190949	0.0132131	TP63/SFN	2
BP	GO:0010482	regulation of epidermal cell division	2/554	3/18722	0.00257071	0.0190949	0.0132131	TP63/SFN	2
BP	GO:0030950	establishment or maintenance of actin cytoskeleton polarity	2/554	3/18722	0.00257071	0.0190949	0.0132131	AQP1/PDLIM1	2
BP	GO:0033484	nitric oxide homeostasis	2/554	3/18722	0.00257071	0.0190949	0.0132131	CAV1/GSTP1	2
BP	GO:0034059	response to anoxia	2/554	3/18722	0.00257071	0.0190949	0.0132131	CCN2/OXTR	2
BP	GO:0045163	clustering of voltage-gated potassium channels	2/554	3/18722	0.00257071	0.0190949	0.0132131	KCNIP2/CNTNAP2	2
BP	GO:0048807	female genitalia morphogenesis	2/554	3/18722	0.00257071	0.0190949	0.0132131	TP63/RBP4	2
BP	GO:0055095	lipoprotein particle mediated signaling	2/554	3/18722	0.00257071	0.0190949	0.0132131	LPL/CD36	2
BP	GO:0055096	low-density lipoprotein particle mediated signaling	2/554	3/18722	0.00257071	0.0190949	0.0132131	LPL/CD36	2
BP	GO:0060197	cloacal septation	2/554	3/18722	0.00257071	0.0190949	0.0132131	TP63/WNT11	2
BP	GO:0071400	cellular response to oleic acid	2/554	3/18722	0.00257071	0.0190949	0.0132131	ASS1/DGAT2	2
BP	GO:0071409	cellular response to cycloheximide	2/554	3/18722	0.00257071	0.0190949	0.0132131	KLF2/KLF4	2
BP	GO:0090244	Wnt signaling pathway involved in somitogenesis	2/554	3/18722	0.00257071	0.0190949	0.0132131	SFRP1/SFRP2	2
BP	GO:0150064	vertebrate eye-specific patterning	2/554	3/18722	0.00257071	0.0190949	0.0132131	C3/C1QA	2
BP	GO:1901491	negative regulation of lymphangiogenesis	2/554	3/18722	0.00257071	0.0190949	0.0132131	EPHA2/FOXC1	2
BP	GO:2000520	regulation of immunological synapse formation	2/554	3/18722	0.00257071	0.0190949	0.0132131	LGALS3/CCR7	2
BP	GO:0044403	biological process involved in symbiotic interaction	18/554	290/18722	0.00261732	0.0194172	0.0134361	GSN/CAV2/CAV1/GAS6/EPHA2/CTSG/LTF/PTX3/JUN/EGFR/CCL5/ICAM1/CD74/WWP1/KRT6A/CLDN1/APOE/ANPEP	18
BP	GO:0045625	regulation of T-helper 1 cell differentiation	3/554	10/18722	0.00264732	0.0195448	0.0135244	CCL19/ANXA1/IL4R	3
BP	GO:2000510	positive regulation of dendritic cell chemotaxis	3/554	10/18722	0.00264732	0.0195448	0.0135244	CCL21/GAS6/CCR7	3
BP	GO:0007613	memory	10/554	118/18722	0.00265573	0.0195448	0.0135244	S100B/PTN/SGK1/RCAN1/PRNP/OXTR/CEBPB/KLK8/APOE/PPP1R1B	10
BP	GO:0002444	myeloid leukocyte mediated immunity	9/554	99/18722	0.00266204	0.0195448	0.0135244	PTGDS/C3/IL6/CTSG/IL4R/ANXA3/KIT/RAC2/SPON2	9
BP	GO:0010717	regulation of epithelial to mesenchymal transition	9/554	99/18722	0.00266204	0.0195448	0.0135244	SFRP1/SPRY2/IL6/SPRY1/TGFBR2/GLIPR2/FOXC1/SFRP2/FOXA1	9
BP	GO:0001975	response to amphetamine	5/554	33/18722	0.00266373	0.0195448	0.0135244	RGS2/NR4A1/OXTR/ICAM1/PPP1R1B	5
BP	GO:0002335	mature B cell differentiation	5/554	33/18722	0.00266373	0.0195448	0.0135244	MFNG/ITM2A/IL6/CMTM7/GPR183	5
BP	GO:0043552	positive regulation of phosphatidylinositol 3-kinase activity	5/554	33/18722	0.00266373	0.0195448	0.0135244	CCL21/CCL19/FGF2/KIT/CCR7	5
BP	GO:0110110	positive regulation of animal organ morphogenesis	5/554	33/18722	0.00266373	0.0195448	0.0135244	NGFR/EDN1/FGF2/SPRY1/WNT11	5
BP	GO:0032273	positive regulation of protein polymerization	11/554	138/18722	0.00269252	0.0197321	0.013654	GSN/CCL21/LMOD1/CDC42EP5/MET/GMFG/CORO1A/CDC42EP1/CCR7/ICAM1/PYCARD	11
BP	GO:0001942	hair follicle development	8/554	81/18722	0.00270395	0.0197438	0.0136621	KRT17/NGFR/TP63/CDH3/SOX18/EGFR/SOSTDC1/FST	8
BP	GO:0001960	negative regulation of cytokine-mediated signaling pathway	8/554	81/18722	0.00270395	0.0197438	0.0136621	CAV1/ADIPOQ/GAS6/IL6/GSTP1/CCDC3/CCL5/PYDC1	8
BP	GO:0048708	astrocyte differentiation	8/554	81/18722	0.00270395	0.0197438	0.0136621	S100B/LIF/IL6/VIM/EGFR/C1QA/S100A9/S100A8	8
BP	GO:0001885	endothelial cell development	7/554	64/18722	0.00276311	0.0201026	0.0139104	CLDN5/MET/SOX18/PECAM1/COL18A1/ICAM1/CLDN1	7
BP	GO:0046888	negative regulation of hormone secretion	7/554	64/18722	0.00276311	0.0201026	0.0139104	SFRP1/LEP/ADIPOQ/EDN1/LIF/CCN3/NMB	7
BP	GO:1903018	regulation of glycoprotein metabolic process	7/554	64/18722	0.00276311	0.0201026	0.0139104	IL33/CCL21/CCL19/ITM2A/PTX3/ITM2C/CCR7	7
BP	GO:0009913	epidermal cell differentiation	14/554	202/18722	0.0028379	0.0206218	0.0142697	KRT17/TP63/KLK5/ANXA1/ZFP36/EPHA2/CDH3/KRT16/AKR1C3/KLF4/FOXC1/TXNIP/SFN/S100A7	14
BP	GO:0060402	calcium ion transport into cytosol	12/554	160/18722	0.00292338	0.0212174	0.0146818	CCL21/CX3CL1/CCL19/CAV1/FGF2/CORO1A/PRNP/CYBA/LCK/CCR7/RAMP3/CXCL9	12
BP	GO:0002761	regulation of myeloid leukocyte differentiation	10/554	120/18722	0.00300213	0.0217627	0.0150591	SFRP1/IL34/ADIPOQ/LIF/LTF/JUN/HCLS1/FOS/CEBPB/CD74	10
BP	GO:0072577	endothelial cell apoptotic process	7/554	65/18722	0.00301934	0.0218349	0.0151091	ECSCR/GAS6/ANGPTL4/AKR1C3/TNFAIP3/ICAM1/CCL2	7
BP	GO:1905330	regulation of morphogenesis of an epithelium	7/554	65/18722	0.00301934	0.0218349	0.0151091	SFRP1/FGF2/LIF/TACSTD2/LCN2/NTN4/ESR1	7
BP	GO:0051604	protein maturation	18/554	294/18722	0.0030289	0.0218544	0.0151226	GSN/VSIR/C1R/SERPINF2/CTSG/F3/CPXM1/CPXM2/NNAT/KLK6/CLEC3B/IFI16/MME/PRNP/CST7/SRGN/GAS1/PYCARD	18
BP	GO:0051767	nitric-oxide synthase biosynthetic process	4/554	21/18722	0.00304017	0.0218544	0.0151226	IL33/EDN1/GSTP1/CCL2	4
BP	GO:0051769	regulation of nitric-oxide synthase biosynthetic process	4/554	21/18722	0.00304017	0.0218544	0.0151226	IL33/EDN1/GSTP1/CCL2	4
BP	GO:0061081	positive regulation of myeloid leukocyte cytokine production involved in immune response	4/554	21/18722	0.00304017	0.0218544	0.0151226	KIT/CD36/SPON2/CD74	4
BP	GO:0071498	cellular response to fluid shear stress	4/554	21/18722	0.00304017	0.0218544	0.0151226	KLF2/KLF4/ASS1/TFPI2	4
BP	GO:0070232	regulation of T cell apoptotic process	5/554	34/18722	0.0030482	0.021886	0.0151444	LGALS3/IL7R/CD27/CCL5/PIP	5
BP	GO:0060401	cytosolic calcium ion transport	13/554	182/18722	0.00305345	0.0218976	0.0151524	CCL21/CX3CL1/CCL19/CAV1/FGF2/CORO1A/PRNP/CCN2/CYBA/LCK/CCR7/RAMP3/CXCL9	13
BP	GO:0006631	fatty acid metabolic process	22/554	390/18722	0.00307141	0.0220002	0.0152234	CAV1/LEP/ADIPOQ/PTGDS/TNXB/C3/GGT5/ANXA1/EDN1/LPL/CYGB/GSTP1/CES1/AKR1C3/CD36/PDK4/CD74/DGAT2/SCD/CYP1B1/GSTA1/FADS2	22
BP	GO:0014075	response to amine	6/554	49/18722	0.00310308	0.0220957	0.0152895	RGS2/NR4A1/OXTR/ICAM1/ASS1/PPP1R1B	6
BP	GO:0030195	negative regulation of blood coagulation	6/554	49/18722	0.00310308	0.0220957	0.0152895	PROS1/SERPINF2/EDN1/C1QTNF1/SERPING1/APOE	6
BP	GO:0070169	positive regulation of biomineral tissue development	6/554	49/18722	0.00310308	0.0220957	0.0152895	PTN/OSR1/CCN1/LTF/TMEM119/CEBPB	6
BP	GO:0070849	response to epidermal growth factor	6/554	49/18722	0.00310308	0.0220957	0.0152895	ID1/ZFP36L2/ZFP36/GSTP1/EGFR/FOXC1	6
BP	GO:1902041	regulation of extrinsic apoptotic signaling pathway via death domain receptors	6/554	49/18722	0.00310308	0.0220957	0.0152895	SFRP1/LGALS3/ATF3/TNFAIP3/ICAM1/SFRP2	6
BP	GO:0016032	viral process	23/554	415/18722	0.00311519	0.0221557	0.0153311	GSN/CAV2/CAV1/GAS6/ZFP36/EPHA2/SLPI/APOBEC3C/LTF/PTX3/JUN/IFI16/EGFR/CCL5/ICAM1/TOP2A/CCL2/CD74/LAMP3/WWP1/CLDN1/APOE/ANPEP	23
BP	GO:0043367	CD4-positive, alpha-beta T cell differentiation	8/554	83/18722	0.00315037	0.0223362	0.015456	CCL19/ANXA1/IL6/IL4R/RELB/RUNX3/SOCS1/GPR183	8
BP	GO:0048678	response to axon injury	8/554	83/18722	0.00315037	0.0223362	0.015456	PTN/FGF2/RGMA/FOLR1/KLF4/APOD/KLK8/TNC	8
BP	GO:0043122	regulation of I-kappaB kinase/NF-kappaB signaling	16/554	249/18722	0.00315169	0.0223362	0.015456	S100B/CCL21/CX3CL1/CCL19/ADIPOQ/GSTP1/LTF/PER1/CD36/TNFAIP3/CCR7/BIRC3/CD74/PYCARD/UBD/ESR1	16
BP	GO:0034308	primary alcohol metabolic process	9/554	102/18722	0.00325928	0.0230716	0.0159648	GPD1/RBP4/ADH1B/LIPE/AKR1C3/ALDH2/ALDH1A1/DGAT2/CYP1B1	9
BP	GO:0014015	positive regulation of gliogenesis	7/554	66/18722	0.00329334	0.0232308	0.016075	IL34/PTN/LIF/TNFRSF1B/IL6/EGR2/EGFR	7
BP	GO:0019229	regulation of vasoconstriction	7/554	66/18722	0.00329334	0.0232308	0.016075	CAV1/LEP/EDN1/EDN3/EGFR/OXTR/ICAM1	7
BP	GO:0071300	cellular response to retinoic acid	7/554	66/18722	0.00329334	0.0232308	0.016075	LEP/OSR1/AQP1/KLF4/FZD7/WNT11/TNC	7
BP	GO:0097553	calcium ion transmembrane import into cytosol	11/554	142/18722	0.00335867	0.0236639	0.0163747	CCL21/CX3CL1/CCL19/FGF2/CORO1A/PRNP/CYBA/LCK/CCR7/RAMP3/CXCL9	11
BP	GO:0050868	negative regulation of T cell activation	10/554	122/18722	0.00338364	0.0238017	0.0164701	VSIR/ANXA1/IL4R/RUNX3/LGALS3/PRNP/SOCS1/VTCN1/CEBPB/CD74	10
BP	GO:0022404	molting cycle process	8/554	84/18722	0.00339404	0.0238017	0.0164701	KRT17/NGFR/TP63/CDH3/SOX18/EGFR/SOSTDC1/FST	8
BP	GO:0022405	hair cycle process	8/554	84/18722	0.00339404	0.0238017	0.0164701	KRT17/NGFR/TP63/CDH3/SOX18/EGFR/SOSTDC1/FST	8
BP	GO:0042310	vasoconstriction	8/554	84/18722	0.00339404	0.0238017	0.0164701	CAV1/LEP/EDN1/EDN3/ACTA2/EGFR/OXTR/ICAM1	8
BP	GO:0046638	positive regulation of alpha-beta T cell differentiation	6/554	50/18722	0.00343982	0.0240388	0.0166341	CCL19/ANXA1/IL4R/RUNX3/TGFBR2/SOCS1	6
BP	GO:0110151	positive regulation of biomineralization	6/554	50/18722	0.00343982	0.0240388	0.0166341	PTN/OSR1/CCN1/LTF/TMEM119/CEBPB	6
BP	GO:1900047	negative regulation of hemostasis	6/554	50/18722	0.00343982	0.0240388	0.0166341	PROS1/SERPINF2/EDN1/C1QTNF1/SERPING1/APOE	6
BP	GO:0010837	regulation of keratinocyte proliferation	5/554	35/18722	0.00347114	0.0241178	0.0166888	TP63/ZFP36/CDH3/SFN/AREG	5
BP	GO:0033280	response to vitamin D	5/554	35/18722	0.00347114	0.0241178	0.0166888	SFRP1/PTN/ALPL/PIM1/TNC	5
BP	GO:0034405	response to fluid shear stress	5/554	35/18722	0.00347114	0.0241178	0.0166888	KLF2/KLF4/ETS1/ASS1/TFPI2	5
BP	GO:0035633	maintenance of blood-brain barrier	5/554	35/18722	0.00347114	0.0241178	0.0166888	CLDN5/JAM2/IL6/PECAM1/CLDN1	5
BP	GO:0098801	regulation of renal system process	5/554	35/18722	0.00347114	0.0241178	0.0166888	NPR1/ADIPOQ/GAS6/EDN1/CYBA	5
BP	GO:0045639	positive regulation of myeloid cell differentiation	9/554	103/18722	0.00348021	0.024153	0.0167131	IL34/LIF/RAB7B/HOXA5/JUN/HCLS1/ETS1/FOS/CD74	9
BP	GO:0002040	sprouting angiogenesis	13/554	185/18722	0.003513	0.0243245	0.0168318	NGFR/ANXA1/RHOJ/FGF2/MMRN2/EPHA2/CLEC14A/MEOX2/KLF2/KLF4/NR4A1/EGR3/S100A1	13
BP	GO:0043433	negative regulation of DNA-binding transcription factor activity	13/554	185/18722	0.003513	0.0243245	0.0168318	ID1/GAS6/NDN/ID3/KLF4/PRNP/PIM1/TNFAIP3/MDFI/PYCARD/CYP1B1/PYDC1/ESR1	13
BP	GO:0001867	complement activation, lectin pathway	3/554	11/18722	0.00356054	0.0244012	0.0168849	MFAP4/A2M/SERPING1	3
BP	GO:0033632	regulation of cell-cell adhesion mediated by integrin	3/554	11/18722	0.00356054	0.0244012	0.0168849	CD3E/CCL5/CXCL13	3
BP	GO:0033690	positive regulation of osteoblast proliferation	3/554	11/18722	0.00356054	0.0244012	0.0168849	CCN1/LTF/TMEM119	3
BP	GO:0045060	negative thymic T cell selection	3/554	11/18722	0.00356054	0.0244012	0.0168849	CD3E/CCR7/CD74	3
BP	GO:0045657	positive regulation of monocyte differentiation	3/554	11/18722	0.00356054	0.0244012	0.0168849	IL34/JUN/CD74	3
BP	GO:0048103	somatic stem cell division	3/554	11/18722	0.00356054	0.0244012	0.0168849	ZFP36L2/KIT/FZD7	3
BP	GO:0071492	cellular response to UV-A	3/554	11/18722	0.00356054	0.0244012	0.0168849	MME/MMP3/MMP2	3
BP	GO:0098883	synapse pruning	3/554	11/18722	0.00356054	0.0244012	0.0168849	CX3CL1/C3/C1QA	3
BP	GO:1900426	positive regulation of defense response to bacterium	3/554	11/18722	0.00356054	0.0244012	0.0168849	KLK5/KLK7/CYBA	3
BP	GO:0002700	regulation of production of molecular mediator of immune response	12/554	164/18722	0.00357504	0.024425	0.0169013	RBP4/KLK5/IL27RA/TNFRSF1B/IL6/KLK7/IL4R/KIT/CD36/SPON2/CD74/MZB1	12
BP	GO:0050792	regulation of viral process	12/554	164/18722	0.00357504	0.024425	0.0169013	GSN/CAV2/ZFP36/SLPI/APOBEC3C/LTF/PTX3/IFI16/CCL5/TOP2A/CD74/LAMP3	12
BP	GO:0046635	positive regulation of alpha-beta T cell activation	7/554	67/18722	0.00358591	0.024425	0.0169013	CCL19/ANXA1/IL4R/RUNX3/TGFBR2/CD3E/SOCS1	7
BP	GO:0061180	mammary gland epithelium development	7/554	67/18722	0.00358591	0.024425	0.0169013	FGF2/EPHA2/HOXA5/CEBPB/SOSTDC1/AREG/ESR1	7
BP	GO:2000514	regulation of CD4-positive, alpha-beta T cell activation	7/554	67/18722	0.00358591	0.024425	0.0169013	VSIR/CCL19/ANXA1/IL4R/RUNX3/TGFBR2/SOCS1	7
BP	GO:0030168	platelet activation	10/554	123/18722	0.00358833	0.024425	0.0169013	SAA1/SELP/C1QTNF1/IL6/MYL9/VWF/F2RL2/LCK/HBB/APOE	10
BP	GO:0051051	negative regulation of transport	25/554	470/18722	0.00360431	0.024506	0.0169574	SFRP1/CRYAB/CAV1/LEP/OSR1/ADIPOQ/GEM/ANXA1/EDN1/CNN2/LIF/TNFRSF1B/CCN3/RRAD/NMB/RGS2/CORO1A/LGALS3/CD36/OXTR/APOD/ICAM1/CD74/MAOB/APOE	25
BP	GO:0045061	thymic T cell selection	4/554	22/18722	0.00362991	0.0245692	0.0170011	CD3D/CD3E/CCR7/CD74	4
BP	GO:0060343	trabecula formation	4/554	22/18722	0.00362991	0.0245692	0.0170011	SFRP1/RBP4/ADAMTS1/MMP2	4
BP	GO:0060563	neuroepithelial cell differentiation	4/554	22/18722	0.00362991	0.0245692	0.0170011	FGF2/FAM20C/CEBPB/WNT11	4
BP	GO:0090280	positive regulation of calcium ion import	4/554	22/18722	0.00362991	0.0245692	0.0170011	LGALS3/CXCL12/CCL2/RAMP3	4
BP	GO:0001656	metanephros development	8/554	85/18722	0.00365207	0.0246361	0.0170474	IRX1/SOX17/OSR1/ADIPOQ/LIF/EGR1/SPRY1/ID3	8
BP	GO:0071277	cellular response to calcium ion	8/554	85/18722	0.00365207	0.0246361	0.0170474	EDN1/JUNB/SYT8/CPNE3/AKR1C3/FOSB/FOS/SYT13	8
BP	GO:0098773	skin epidermis development	8/554	85/18722	0.00365207	0.0246361	0.0170474	KRT17/NGFR/TP63/CDH3/SOX18/EGFR/SOSTDC1/FST	8
BP	GO:0120032	regulation of plasma membrane bounded cell projection assembly	13/554	186/18722	0.00367811	0.024784	0.0171498	CCL21/CCL19/CAV1/CDC42EP5/EPHA2/KIT/RAC2/TACSTD2/CDC42EP1/KLF5/FSCN1/CCR7/ICAM1	13
BP	GO:0060419	heart growth	9/554	104/18722	0.00371273	0.0249615	0.0172726	RBP4/S1PR1/EDN1/FGF2/PI16/RGS2/TGFBR2/PIM1/FOXC1	9
BP	GO:1901890	positive regulation of cell junction assembly	9/554	104/18722	0.00371273	0.0249615	0.0172726	SFRP1/CLDN5/CAV1/EPHA2/COL16A1/OXTR/NTRK2/CLDN1/CNTNAP2	9
BP	GO:0045862	positive regulation of proteolysis	21/554	372/18722	0.0037421	0.0251309	0.0173898	NGFR/GSN/VSIR/CAV1/ECSCR/CCN1/TNFRSF1B/PCOLCE2/F3/NOP53/RGMA/CLEC3B/IFI16/CCN2/LCK/FBLN1/APOE/PYCARD/SFRP2/S100A9/S100A8	21
BP	GO:0014009	glial cell proliferation	6/554	51/18722	0.00380299	0.0254547	0.0176139	IL34/CX3CL1/PTN/IL6/EGFR/AREG	6
BP	GO:0032964	collagen biosynthetic process	6/554	51/18722	0.00380299	0.0254547	0.0176139	SERPINF2/IL6/CYGB/VIM/CCN2/EMILIN1	6
BP	GO:0043124	negative regulation of I-kappaB kinase/NF-kappaB signaling	6/554	51/18722	0.00380299	0.0254547	0.0176139	ADIPOQ/GSTP1/PER1/TNFAIP3/PYCARD/ESR1	6
BP	GO:0042531	positive regulation of tyrosine phosphorylation of STAT protein	7/554	68/18722	0.00389783	0.0260605	0.0180331	LEP/LIF/IL6/KIT/HCLS1/CCL5/CRLF1	7
BP	GO:0038179	neurotrophin signaling pathway	5/554	36/18722	0.00393461	0.0261902	0.0181228	SPRY2/NDN/SPRY1/CORO1A/NTRK2	5
BP	GO:0042092	type 2 immune response	5/554	36/18722	0.00393461	0.0261902	0.0181228	ANXA1/IL27RA/IL6/IL4R/CD74	5
BP	GO:0070306	lens fiber cell differentiation	5/554	36/18722	0.00393461	0.0261902	0.0181228	SPRY2/FGF2/EPHA2/SPRY1/VIM	5
BP	GO:0090322	regulation of superoxide metabolic process	5/554	36/18722	0.00393461	0.0261902	0.0181228	FBLN5/GSTP1/EGFR/CYBA/CD36	5
BP	GO:0010594	regulation of endothelial cell migration	15/554	232/18722	0.0039477	0.0262194	0.018143	PTN/ANXA1/EDN1/RHOJ/FGF2/MMRN2/EPHA2/MET/ANXA3/MEOX2/KLF4/ETS1/LCN2/APOE/CXCL13	15
BP	GO:0032271	regulation of protein polymerization	15/554	232/18722	0.0039477	0.0262194	0.018143	GSN/CCL21/LMOD1/CDC42EP5/MET/GMFG/ELN/HCLS1/CORO1A/CDC42EP1/COTL1/CCR7/ICAM1/ARHGAP40/PYCARD	15
BP	GO:0062207	regulation of pattern recognition receptor signaling pathway	9/554	105/18722	0.00395725	0.0262539	0.0181669	CAV1/LTF/RAB7B/NOP53/CYBA/CD36/TNFAIP3/BIRC3/ESR1	9
BP	GO:0060491	regulation of cell projection assembly	13/554	188/18722	0.00402719	0.0266884	0.0184676	CCL21/CCL19/CAV1/CDC42EP5/EPHA2/KIT/RAC2/TACSTD2/CDC42EP1/KLF5/FSCN1/CCR7/ICAM1	13
BP	GO:0060071	Wnt signaling pathway, planar cell polarity pathway	6/554	52/18722	0.00419383	0.0277317	0.0191895	SFRP1/PLEKHA4/FZD7/WNT11/VANGL2/SFRP2	6
BP	GO:0072132	mesenchyme morphogenesis	6/554	52/18722	0.00419383	0.0277317	0.0191895	OSR1/ACTG2/ACTA2/TGFBR2/FOXC1/WNT11	6
BP	GO:0001776	leukocyte homeostasis	8/554	87/18722	0.00421344	0.0277446	0.0191984	ANXA1/IL6/SPNS2/CORO1A/TNFAIP3/SIT1/GPR183/CD74	8
BP	GO:0002062	chondrocyte differentiation	9/554	106/18722	0.0042142	0.0277446	0.0191984	OSR1/CCN3/RUNX3/CCN2/TGFBR2/NFIB/EFEMP1/SFRP2/COL11A1	9
BP	GO:0019882	antigen processing and presentation	9/554	106/18722	0.0042142	0.0277446	0.0191984	CCL21/CCL19/CD1C/RELB/CCR7/ICAM1/CD74/CD8A/PYCARD	9
BP	GO:0035821	modulation of process of other organism	9/554	106/18722	0.0042142	0.0277446	0.0191984	CAV2/SLPI/LTF/PTX3/JUN/CCL5/KRT6A/APOE/S100A9	9
BP	GO:1904377	positive regulation of protein localization to cell periphery	7/554	69/18722	0.00422991	0.0278177	0.019249	STAC2/EPHA2/SORBS1/LGALS3/PRNP/EGFR/RAMP3	7
BP	GO:0003081	regulation of systemic arterial blood pressure by renin-angiotensin	4/554	23/18722	0.00429268	0.0280467	0.0194075	SERPINF2/CTSG/MME/CYBA	4
BP	GO:0016338	calcium-independent cell-cell adhesion via plasma membrane cell-adhesion molecules	4/554	23/18722	0.00429268	0.0280467	0.0194075	CLDN11/CX3CL1/CLDN5/CLDN1	4
BP	GO:0034695	response to prostaglandin E	4/554	23/18722	0.00429268	0.0280467	0.0194075	SFRP1/CCL21/CCL19/CCR7	4
BP	GO:0060143	positive regulation of syncytium formation by plasma membrane fusion	4/554	23/18722	0.00429268	0.0280467	0.0194075	IL4R/EHD2/SCGB3A1/CXCL9	4
BP	GO:0060487	lung epithelial cell differentiation	4/554	23/18722	0.00429268	0.0280467	0.0194075	KLF2/HOXA5/NFIB/FOXA1	4
BP	GO:0071305	cellular response to vitamin D	4/554	23/18722	0.00429268	0.0280467	0.0194075	SFRP1/PTN/PIM1/TNC	4
BP	GO:0001889	liver development	11/554	147/18722	0.00437056	0.0284938	0.0197168	LIMS2/PTN/ANXA1/IL6/MET/EGFR/TNFAIP3/CEBPB/ASS1/FRZB/CLDN1	11
BP	GO:1903531	negative regulation of secretion by cell	11/554	147/18722	0.00437056	0.0284938	0.0197168	SFRP1/LEP/ADIPOQ/ANXA1/EDN1/LIF/TNFRSF1B/CCN3/NMB/MAOB/APOE	11
BP	GO:0007249	I-kappaB kinase/NF-kappaB signaling	17/554	281/18722	0.00439365	0.0286134	0.0197996	S100B/CCL21/CX3CL1/CCL19/ADIPOQ/GSTP1/RELB/LTF/PER1/CD36/TNFAIP3/CCR7/BIRC3/CD74/PYCARD/UBD/ESR1	17
BP	GO:0002699	positive regulation of immune effector process	15/554	235/18722	0.0044447	0.0288959	0.0199951	RBP4/CCL19/CD1C/C3/KLK5/ANXA1/IL6/KLK7/IL4R/KIT/RAC2/CD36/SPON2/CD74/MZB1	15
BP	GO:0031348	negative regulation of defense response	16/554	258/18722	0.00444663	0.0288959	0.0199951	SAA1/CX3CL1/FNDC4/ADIPOQ/SOCS3/A2M/TNFRSF1B/ZFP36/SERPING1/CCN3/GSTP1/KLF4/IFI16/TNFAIP3/CST7/APOE	16
BP	GO:0007229	integrin-mediated signaling pathway	9/554	107/18722	0.00448398	0.0290759	0.0201196	LIMS2/ITGA7/PTN/ITGB4/ADAMTS1/COL16A1/DST/CCN2/NEDD9	9
BP	GO:0032526	response to retinoic acid	9/554	107/18722	0.00448398	0.0290759	0.0201196	RBP4/LEP/OSR1/AQP1/KLF4/FZD7/DUSP1/WNT11/TNC	9
BP	GO:0014074	response to purine-containing compound	11/554	148/18722	0.00459934	0.0297284	0.0205711	GPD1/AQP1/ADIPOQ/CDO1/PER1/JUN/FOSB/FOS/DUSP1/ASS1/AREG	11
BP	GO:1903900	regulation of viral life cycle	11/554	148/18722	0.00459934	0.0297284	0.0205711	GSN/CAV2/SLPI/APOBEC3C/LTF/PTX3/IFI16/CCL5/TOP2A/CD74/LAMP3	11
BP	GO:0001541	ovarian follicle development	6/554	53/18722	0.00461355	0.0297284	0.0205711	PTX3/KIT/FOXC1/CEBPB/ICAM1/ESR1	6
BP	GO:0007566	embryo implantation	6/554	53/18722	0.00461355	0.0297284	0.0205711	ITGB4/LIF/TGFBR2/FBLN1/PRLR/MMP2	6
BP	GO:0050819	negative regulation of coagulation	6/554	53/18722	0.00461355	0.0297284	0.0205711	PROS1/SERPINF2/EDN1/C1QTNF1/SERPING1/APOE	6
BP	GO:0010454	negative regulation of cell fate commitment	3/554	12/18722	0.00464383	0.0297284	0.0205711	FZD7/SOSTDC1/SFRP2	3
BP	GO:0043383	negative T cell selection	3/554	12/18722	0.00464383	0.0297284	0.0205711	CD3E/CCR7/CD74	3
BP	GO:0060907	positive regulation of macrophage cytokine production	3/554	12/18722	0.00464383	0.0297284	0.0205711	CD36/SPON2/CD74	3
BP	GO:0061517	macrophage proliferation	3/554	12/18722	0.00464383	0.0297284	0.0205711	IL33/IL34/CX3CL1	3
BP	GO:0072182	regulation of nephron tubule epithelial cell differentiation	3/554	12/18722	0.00464383	0.0297284	0.0205711	OSR1/LIF/PROM1	3
BP	GO:0072683	T cell extravasation	3/554	12/18722	0.00464383	0.0297284	0.0205711	IL27RA/ICAM1/CCL2	3
BP	GO:2000508	regulation of dendritic cell chemotaxis	3/554	12/18722	0.00464383	0.0297284	0.0205711	CCL21/GAS6/CCR7	3
BP	GO:0071214	cellular response to abiotic stimulus	19/554	331/18722	0.00474942	0.0303399	0.0209943	SFRP1/CRYAB/PTN/MMP7/AQP1/MFAP4/CNN2/MYLK/EGR1/RELB/YBX3/IFI16/MME/EGFR/CYBA/MMP3/WNT11/MMP2/SFRP2	19
BP	GO:0104004	cellular response to environmental stimulus	19/554	331/18722	0.00474942	0.0303399	0.0209943	SFRP1/CRYAB/PTN/MMP7/AQP1/MFAP4/CNN2/MYLK/EGR1/RELB/YBX3/IFI16/MME/EGFR/CYBA/MMP3/WNT11/MMP2/SFRP2	19
BP	GO:0001952	regulation of cell-matrix adhesion	10/554	128/18722	0.00476364	0.0303663	0.0210125	SFRP1/CCL21/CX3CL1/FAM107A/COL16A1/CCL28/CD36/CD3E/APOD/CCR7	10
BP	GO:0017015	regulation of transforming growth factor beta receptor signaling pathway	10/554	128/18722	0.00476364	0.0303663	0.0210125	CAV2/CAV1/CIDEA/LTBP4/CDKN1C/SPRY2/SPRY1/FOLR1/EMILIN1/NPNT	10
BP	GO:0046330	positive regulation of JNK cascade	8/554	89/18722	0.00483902	0.0308142	0.0213225	CCL21/CCL19/SERPINF2/CCN2/CD27/FZD7/CCR7/PYCARD	8
BP	GO:0071230	cellular response to amino acid stimulus	7/554	71/18722	0.00495776	0.0308896	0.0213747	COL16A1/CYBA/SOCS1/NTRK2/CEBPB/ASS1/MMP2	7
BP	GO:0010719	negative regulation of epithelial to mesenchymal transition	5/554	38/18722	0.00499147	0.0308896	0.0213747	SFRP1/SPRY2/SPRY1/SFRP2/FOXA1	5
BP	GO:0002922	positive regulation of humoral immune response	4/554	24/18722	0.00503245	0.0308896	0.0213747	C3/KLK5/KLK7/CCR7	4
BP	GO:0040037	negative regulation of fibroblast growth factor receptor signaling pathway	4/554	24/18722	0.00503245	0.0308896	0.0213747	NGFR/SPRY2/FGF2/SPRY1	4
BP	GO:0045649	regulation of macrophage differentiation	4/554	24/18722	0.00503245	0.0308896	0.0213747	IL34/ADIPOQ/LIF/HCLS1	4
BP	GO:0051043	regulation of membrane protein ectodomain proteolysis	4/554	24/18722	0.00503245	0.0308896	0.0213747	TNFRSF1B/RGMA/TIMP4/APOE	4
BP	GO:0060479	lung cell differentiation	4/554	24/18722	0.00503245	0.0308896	0.0213747	KLF2/HOXA5/NFIB/FOXA1	4
BP	GO:0060561	apoptotic process involved in morphogenesis	4/554	24/18722	0.00503245	0.0308896	0.0213747	CRYAB/CCN1/TNFRSF1B/FOXC1	4
BP	GO:0072010	glomerular epithelium development	4/554	24/18722	0.00503245	0.0308896	0.0213747	ADIPOQ/PECAM1/FOXC1/PROM1	4
BP	GO:0098743	cell aggregation	4/554	24/18722	0.00503245	0.0308896	0.0213747	LTF/CCN2/MGP/COL11A1	4
BP	GO:2000209	regulation of anoikis	4/554	24/18722	0.00503245	0.0308896	0.0213747	CAV1/PDK4/NTRK2/CEACAM5	4
BP	GO:0001766	membrane raft polarization	2/554	4/18722	0.00504059	0.0308896	0.0213747	GSN/CD2	2
BP	GO:0010046	response to mycotoxin	2/554	4/18722	0.00504059	0.0308896	0.0213747	LCN2/ASS1	2
BP	GO:0014826	vein smooth muscle contraction	2/554	4/18722	0.00504059	0.0308896	0.0213747	EDN1/EDN3	2
BP	GO:0035844	cloaca development	2/554	4/18722	0.00504059	0.0308896	0.0213747	TP63/WNT11	2
BP	GO:0038116	chemokine (C-C motif) ligand 21 signaling pathway	2/554	4/18722	0.00504059	0.0308896	0.0213747	CCL21/CCR7	2
BP	GO:0046898	response to cycloheximide	2/554	4/18722	0.00504059	0.0308896	0.0213747	KLF2/KLF4	2
BP	GO:0048866	stem cell fate specification	2/554	4/18722	0.00504059	0.0308896	0.0213747	SOX17/SOX18	2
BP	GO:0051387	negative regulation of neurotrophin TRK receptor signaling pathway	2/554	4/18722	0.00504059	0.0308896	0.0213747	SPRY2/SPRY1	2
BP	GO:0060214	endocardium formation	2/554	4/18722	0.00504059	0.0308896	0.0213747	SOX17/SOX18	2
BP	GO:0060584	regulation of prostaglandin-endoperoxide synthase activity	2/554	4/18722	0.00504059	0.0308896	0.0213747	EDN1/EDN3	2
BP	GO:0060585	positive regulation of prostaglandin-endoperoxide synthase activity	2/554	4/18722	0.00504059	0.0308896	0.0213747	EDN1/EDN3	2
BP	GO:0060750	epithelial cell proliferation involved in mammary gland duct elongation	2/554	4/18722	0.00504059	0.0308896	0.0213747	AREG/ESR1	2
BP	GO:0060751	branch elongation involved in mammary gland duct branching	2/554	4/18722	0.00504059	0.0308896	0.0213747	AREG/ESR1	2
BP	GO:0061056	sclerotome development	2/554	4/18722	0.00504059	0.0308896	0.0213747	MEOX1/SFRP2	2
BP	GO:0061771	response to caloric restriction	2/554	4/18722	0.00504059	0.0308896	0.0213747	RARRES2/APOE	2
BP	GO:0070836	caveola assembly	2/554	4/18722	0.00504059	0.0308896	0.0213747	CAV2/CAV1	2
BP	GO:0071798	response to prostaglandin D	2/554	4/18722	0.00504059	0.0308896	0.0213747	AKR1C3/TNC	2
BP	GO:0071799	cellular response to prostaglandin D stimulus	2/554	4/18722	0.00504059	0.0308896	0.0213747	AKR1C3/TNC	2
BP	GO:0072268	pattern specification involved in metanephros development	2/554	4/18722	0.00504059	0.0308896	0.0213747	IRX1/OSR1	2
BP	GO:0090185	negative regulation of kidney development	2/554	4/18722	0.00504059	0.0308896	0.0213747	OSR1/ADIPOQ	2
BP	GO:0097029	mature conventional dendritic cell differentiation	2/554	4/18722	0.00504059	0.0308896	0.0213747	CCL19/CCR7	2
BP	GO:0150062	complement-mediated synapse pruning	2/554	4/18722	0.00504059	0.0308896	0.0213747	C3/C1QA	2
BP	GO:1901685	glutathione derivative metabolic process	2/554	4/18722	0.00504059	0.0308896	0.0213747	GSTP1/GSTA1	2
BP	GO:1901687	glutathione derivative biosynthetic process	2/554	4/18722	0.00504059	0.0308896	0.0213747	GSTP1/GSTA1	2
BP	GO:1904956	regulation of midbrain dopaminergic neuron differentiation	2/554	4/18722	0.00504059	0.0308896	0.0213747	SFRP1/SFRP2	2
BP	GO:1990523	bone regeneration	2/554	4/18722	0.00504059	0.0308896	0.0213747	CCN3/LGR6	2
BP	GO:0001706	endoderm formation	6/554	54/18722	0.00506338	0.0309663	0.0214277	LAMB3/ITGA7/SOX17/DUSP1/MMP2/COL11A1	6
BP	GO:0070228	regulation of lymphocyte apoptotic process	6/554	54/18722	0.00506338	0.0309663	0.0214277	LGALS3/IL7R/CD27/CCL5/CD74/PIP	6
BP	GO:0042475	odontogenesis of dentin-containing tooth	8/554	90/18722	0.00517731	0.0315989	0.0218655	NGFR/TP63/KLK5/FAM20C/FOXC1/SOSTDC1/FST/TNC	8
BP	GO:1904705	regulation of vascular associated smooth muscle cell proliferation	8/554	90/18722	0.00517731	0.0315989	0.0218655	CNN1/ADIPOQ/ADAMTS1/EDN1/FGF2/GSTP1/JUN/MMP2	8
BP	GO:1904064	positive regulation of cation transmembrane transport	11/554	151/18722	0.00534317	0.0324542	0.0224573	KCNMB1/CX3CL1/KCNIP2/STAC2/EDN3/LCN2/CCL2/KCNN4/S100A1/RAMP3/CXCL9	11
BP	GO:0001736	establishment of planar polarity	7/554	72/18722	0.00535516	0.0324542	0.0224573	SFRP1/TP63/PLEKHA4/FZD7/WNT11/VANGL2/SFRP2	7
BP	GO:0007164	establishment of tissue polarity	7/554	72/18722	0.00535516	0.0324542	0.0224573	SFRP1/TP63/PLEKHA4/FZD7/WNT11/VANGL2/SFRP2	7
BP	GO:0035567	non-canonical Wnt signaling pathway	7/554	72/18722	0.00535516	0.0324542	0.0224573	SFRP1/PLEKHA4/FZD7/WNT11/FRZB/VANGL2/SFRP2	7
BP	GO:0043903	regulation of biological process involved in symbiotic interaction	7/554	72/18722	0.00535516	0.0324542	0.0224573	GSN/CAV2/CAV1/LTF/PTX3/CD74/KRT6A	7
BP	GO:0055021	regulation of cardiac muscle tissue growth	7/554	72/18722	0.00535516	0.0324542	0.0224573	RBP4/EDN1/FGF2/PI16/RGS2/TGFBR2/PIM1	7
BP	GO:1903036	positive regulation of response to wounding	7/554	72/18722	0.00535516	0.0324542	0.0224573	PTN/SERPINF2/ANXA1/F3/MYLK/CD36/CLDN1	7
BP	GO:0032868	response to insulin	16/554	264/18722	0.00553028	0.0333999	0.0231117	CAV2/TRARG1/LEP/ADIPOQ/SOCS3/LPL/GSTP1/EGR1/SORBS1/EGR2/PDK4/SOCS1/ICAM1/RARRES2/IGF2/MZB1	16
BP	GO:0002065	columnar/cuboidal epithelial cell differentiation	8/554	91/18722	0.00553338	0.0333999	0.0231117	TP63/FGF2/FAM20C/HOXA5/KLF5/CEBPB/WNT11/FOXA1	8
BP	GO:0072080	nephron tubule development	8/554	91/18722	0.00553338	0.0333999	0.0231117	IRX1/OSR1/FGF2/LIF/TACSTD2/WNT11/PROM1/NPNT	8
BP	GO:1990874	vascular associated smooth muscle cell proliferation	8/554	91/18722	0.00553338	0.0333999	0.0231117	CNN1/ADIPOQ/ADAMTS1/EDN1/FGF2/GSTP1/JUN/MMP2	8
BP	GO:0045620	negative regulation of lymphocyte differentiation	6/554	55/18722	0.00554457	0.0334005	0.0231121	SFRP1/ANXA1/IL4R/RUNX3/SOCS1/CD74	6
BP	GO:0061098	positive regulation of protein tyrosine kinase activity	6/554	55/18722	0.00554457	0.0334005	0.0231121	IL34/GAS6/PRNP/NEDD9/CCL5/AREG	6
BP	GO:0010463	mesenchymal cell proliferation	5/554	39/18722	0.00558895	0.0336006	0.0232506	PTN/OSR1/TGFBR2/WNT11/NFIB	5
BP	GO:2000516	positive regulation of CD4-positive, alpha-beta T cell activation	5/554	39/18722	0.00558895	0.0336006	0.0232506	CCL19/ANXA1/IL4R/TGFBR2/SOCS1	5
BP	GO:1903844	regulation of cellular response to transforming growth factor beta stimulus	10/554	131/18722	0.00560208	0.0336331	0.023273	CAV2/CAV1/CIDEA/LTBP4/CDKN1C/SPRY2/SPRY1/FOLR1/EMILIN1/NPNT	10
BP	GO:0070588	calcium ion transmembrane transport	18/554	312/18722	0.00560551	0.0336331	0.023273	CCL21/CX3CL1/CCL19/STAC2/GAS6/GEM/FGF2/CACHD1/RRAD/TMEM37/CORO1A/PRNP/CYBA/LCK/CCR7/S100A1/RAMP3/CXCL9	18
BP	GO:0070997	neuron death	20/554	361/18722	0.00564369	0.0338284	0.0234082	NGFR/TP63/CX3CL1/TNFRSF1B/EGR1/JUN/CORO1A/PRNP/LCN2/CCL5/FOS/NTRK2/CEBPB/NES/CRLF1/CCL2/C1QA/SNCG/APOE/BTG2	20
BP	GO:0035924	cellular response to vascular endothelial growth factor stimulus	7/554	73/18722	0.00577598	0.0345183	0.0238856	SPRY2/ANXA1/NR4A1/FOXC1/SPHK1/EGR3/GAS1	7
BP	GO:0072088	nephron epithelium morphogenesis	7/554	73/18722	0.00577598	0.0345183	0.0238856	IRX1/OSR1/FGF2/LIF/TACSTD2/WNT11/NPNT	7
BP	GO:0072089	stem cell proliferation	7/554	73/18722	0.00577598	0.0345183	0.0238856	SOX17/FGF2/SOX18/PIM1/FBLN1/NES/SFRP2	7
BP	GO:0034764	positive regulation of transmembrane transport	14/554	219/18722	0.00580213	0.0346402	0.02397	KCNMB1/CX3CL1/KCNIP2/ADIPOQ/STAC2/C3/SORBS1/EDN3/LCN2/CCL2/KCNN4/S100A1/RAMP3/CXCL9	14
BP	GO:0010560	positive regulation of glycoprotein biosynthetic process	4/554	25/18722	0.00585302	0.0347375	0.0240373	IL33/CCL21/CCL19/CCR7	4
BP	GO:0031579	membrane raft organization	4/554	25/18722	0.00585302	0.0347375	0.0240373	GSN/CAV2/CAV1/CD2	4
BP	GO:0031664	regulation of lipopolysaccharide-mediated signaling pathway	4/554	25/18722	0.00585302	0.0347375	0.0240373	CX3CL1/LTF/CD36/TNFAIP3	4
BP	GO:0045109	intermediate filament organization	4/554	25/18722	0.00585302	0.0347375	0.0240373	KRT17/KRT14/VIM/PKP1	4
BP	GO:0072012	glomerulus vasculature development	4/554	25/18722	0.00585302	0.0347375	0.0240373	OSR1/EGR1/PECAM1/ACTA2	4
BP	GO:1904996	positive regulation of leukocyte adhesion to vascular endothelial cell	4/554	25/18722	0.00585302	0.0347375	0.0240373	SELP/IL6/ETS1/ICAM1	4
BP	GO:0060707	trophoblast giant cell differentiation	3/554	13/18722	0.00590549	0.0349939	0.0242147	SOCS3/LIF/MDFI	3
BP	GO:0048525	negative regulation of viral process	8/554	92/18722	0.00590783	0.0349939	0.0242147	GSN/ZFP36/SLPI/APOBEC3C/LTF/PTX3/IFI16/CCL5	8
BP	GO:0048705	skeletal system morphogenesis	14/554	220/18722	0.00603393	0.0357057	0.0247072	SFRP1/OSR1/ALPL/LTF/HOXA5/CCN2/TGFBR2/TMEM119/FOXC1/MGP/MDFI/MMP2/SFRP2/COL11A1	14
BP	GO:0046632	alpha-beta T cell differentiation	9/554	112/18722	0.00604049	0.0357094	0.0247098	CCL19/ANXA1/IL6/IL4R/RELB/RUNX3/TGFBR2/SOCS1/GPR183	9
BP	GO:0046456	icosanoid biosynthetic process	6/554	56/18722	0.00605833	0.0357448	0.0247343	PTGDS/GGT5/ANXA1/EDN1/AKR1C3/CD74	6
BP	GO:0090175	regulation of establishment of planar polarity	6/554	56/18722	0.00605833	0.0357448	0.0247343	SFRP1/PLEKHA4/FZD7/WNT11/VANGL2/SFRP2	6
BP	GO:0006801	superoxide metabolic process	7/554	74/18722	0.00622103	0.0366444	0.0253568	SOD3/FBLN5/EDN1/GSTP1/EGFR/CYBA/CD36	7
BP	GO:0010863	positive regulation of phospholipase C activity	5/554	40/18722	0.00623514	0.0366444	0.0253568	FGF2/S1PR4/KIT/EGFR/ESR1	5
BP	GO:0030501	positive regulation of bone mineralization	5/554	40/18722	0.00623514	0.0366444	0.0253568	PTN/OSR1/CCN1/LTF/TMEM119	5
BP	GO:0072210	metanephric nephron development	5/554	40/18722	0.00623514	0.0366444	0.0253568	IRX1/OSR1/ADIPOQ/LIF/EGR1	5
BP	GO:0008406	gonad development	14/554	221/18722	0.00627311	0.0368316	0.0254863	SFRP1/LEP/OSR1/ADAMTS1/PTX3/KIT/YBX3/AKR1C3/FOXC1/CEBPB/ICAM1/FST/SFRP2/ESR1	14
BP	GO:0051147	regulation of muscle cell differentiation	11/554	155/18722	0.0064792	0.0380046	0.026298	EDN1/CCN3/PI16/BHLHE41/KIT/RGS2/TMEM119/FZD7/OLFM2/IGF2/CEACAM5	11
BP	GO:0050891	multicellular organismal water homeostasis	6/554	57/18722	0.00660591	0.0387101	0.0267862	TP63/AQP1/MET/KRT16/SFN/CLDN1	6
BP	GO:0006094	gluconeogenesis	7/554	75/18722	0.00669114	0.0391715	0.0271054	GPD1/RBP4/LEP/ADIPOQ/NNMT/ATF3/DGAT2	7
BP	GO:0030316	osteoclast differentiation	8/554	94/18722	0.00671418	0.0391921	0.0271197	SFRP1/JUNB/EPHA2/LTF/TF/FOS/GPR183/CEBPB	8
BP	GO:0051702	biological process involved in interaction with symbiont	8/554	94/18722	0.00671418	0.0391921	0.0271197	CAV2/CTSG/LTF/PTX3/JUN/CCL5/KRT6A/APOE	8
BP	GO:0061326	renal tubule development	8/554	94/18722	0.00671418	0.0391921	0.0271197	IRX1/OSR1/FGF2/LIF/TACSTD2/WNT11/PROM1/NPNT	8
BP	GO:0010875	positive regulation of cholesterol efflux	4/554	26/18722	0.00675807	0.0393339	0.0272179	CAV1/ADIPOQ/CES1/APOE	4
BP	GO:0046639	negative regulation of alpha-beta T cell differentiation	4/554	26/18722	0.00675807	0.0393339	0.0272179	ANXA1/IL4R/RUNX3/SOCS1	4
BP	GO:1905523	positive regulation of macrophage migration	4/554	26/18722	0.00675807	0.0393339	0.0272179	IL34/CX3CL1/CCL5/RARRES2	4
BP	GO:0046631	alpha-beta T cell activation	11/554	156/18722	0.00679081	0.0394864	0.0273233	VSIR/CCL19/ANXA1/IL6/IL4R/RELB/RUNX3/TGFBR2/CD3E/SOCS1/GPR183	11
BP	GO:0048015	phosphatidylinositol-mediated signaling	12/554	178/18722	0.00682936	0.0396722	0.0274519	SELP/LEP/EDN1/FGF2/HCST/NOP53/KIT/KLF4/HCLS1/EGFR/CCL5/NTRK2	12
BP	GO:0032735	positive regulation of interleukin-12 production	5/554	41/18722	0.00693204	0.0401525	0.0277843	CCL19/LEP/LTB/CD36/CCR7	5
BP	GO:0050856	regulation of T cell receptor signaling pathway	5/554	41/18722	0.00693204	0.0401525	0.0277843	LGALS3/PRNP/LCK/CCR7/KCNN4	5
BP	GO:1905521	regulation of macrophage migration	5/554	41/18722	0.00693204	0.0401525	0.0277843	IL34/CX3CL1/CCL5/EMILIN1/RARRES2	5
BP	GO:1901214	regulation of neuron death	18/554	319/18722	0.00700003	0.0405074	0.0280298	CX3CL1/TNFRSF1B/EGR1/JUN/CORO1A/PRNP/LCN2/CCL5/FOS/NTRK2/CEBPB/NES/CRLF1/CCL2/C1QA/SNCG/APOE/BTG2	18
BP	GO:0010950	positive regulation of endopeptidase activity	12/554	179/18722	0.00713009	0.0412023	0.0285107	NGFR/GSN/VSIR/CCN1/F3/IFI16/CCN2/LCK/PYCARD/SFRP2/S100A9/S100A8	12
BP	GO:0002532	production of molecular mediator involved in inflammatory response	8/554	95/18722	0.00714729	0.0412023	0.0285107	LEP/IL17B/IL6/IL4R/PER1/CD36/APOD/PYCARD	8
BP	GO:0007044	cell-substrate junction assembly	8/554	95/18722	0.00714729	0.0412023	0.0285107	COL17A1/SFRP1/ITGB4/FAM107A/COL16A1/SORBS1/DST/APOD	8
BP	GO:0051209	release of sequestered calcium ion into cytosol	9/554	115/18722	0.00715629	0.0412023	0.0285107	CCL21/CX3CL1/CCL19/FGF2/CORO1A/CYBA/LCK/CCR7/CXCL9	9
BP	GO:0014823	response to activity	7/554	76/18722	0.00718715	0.0412023	0.0285107	PTN/LEP/ADIPOQ/EDN1/IL6/CYBA/RARRES2	7
BP	GO:0072028	nephron morphogenesis	7/554	76/18722	0.00718715	0.0412023	0.0285107	IRX1/OSR1/FGF2/LIF/TACSTD2/WNT11/NPNT	7
BP	GO:0002763	positive regulation of myeloid leukocyte differentiation	6/554	58/18722	0.00718851	0.0412023	0.0285107	IL34/LIF/JUN/HCLS1/FOS/CD74	6
BP	GO:0010043	response to zinc ion	6/554	58/18722	0.00718851	0.0412023	0.0285107	KRT14/MT1M/MT1X/ASS1/MT1E/S100A8	6
BP	GO:0010559	regulation of glycoprotein biosynthetic process	6/554	58/18722	0.00718851	0.0412023	0.0285107	IL33/CCL21/CCL19/ITM2A/ITM2C/CCR7	6
BP	GO:0043506	regulation of JUN kinase activity	6/554	58/18722	0.00718851	0.0412023	0.0285107	SFRP1/CCL19/TNXB/EDN1/GSTP1/SFRP2	6
BP	GO:0010838	positive regulation of keratinocyte proliferation	3/554	14/18722	0.00735264	0.0418642	0.0289687	TP63/CDH3/AREG	3
BP	GO:0032966	negative regulation of collagen biosynthetic process	3/554	14/18722	0.00735264	0.0418642	0.0289687	IL6/CYGB/EMILIN1	3
BP	GO:0044764	multi-organism cellular process	3/554	14/18722	0.00735264	0.0418642	0.0289687	CAV2/CAV1/GAS6	3
BP	GO:0045059	positive thymic T cell selection	3/554	14/18722	0.00735264	0.0418642	0.0289687	CD3D/CD3E/CD74	3
BP	GO:0046348	amino sugar catabolic process	3/554	14/18722	0.00735264	0.0418642	0.0289687	CHI3L1/CHI3L2/ALDH1A1	3
BP	GO:0072160	nephron tubule epithelial cell differentiation	3/554	14/18722	0.00735264	0.0418642	0.0289687	OSR1/LIF/PROM1	3
BP	GO:0086103	G protein-coupled receptor signaling pathway involved in heart process	3/554	14/18722	0.00735264	0.0418642	0.0289687	CAV1/RGS2/RAMP3	3
BP	GO:0046883	regulation of hormone secretion	15/554	249/18722	0.00748093	0.0425544	0.0294463	SFRP1/RBP4/LEP/ADIPOQ/ANXA1/EDN1/C1QTNF1/LIF/IL6/CCN3/EDN3/NMB/NNAT/EGFR/CCL5	15
BP	GO:0008286	insulin receptor signaling pathway	9/554	116/18722	0.00756122	0.0428897	0.0296783	CAV2/LEP/SOCS3/SORBS1/PDK4/SOCS1/RARRES2/IGF2/MZB1	9
BP	GO:0021782	glial cell development	9/554	116/18722	0.00756122	0.0428897	0.0296783	ITGB4/IL6/GSTP1/VIM/EGFR/NTRK2/C1QA/S100A9/S100A8	9
BP	GO:0051283	negative regulation of sequestering of calcium ion	9/554	116/18722	0.00756122	0.0428897	0.0296783	CCL21/CX3CL1/CCL19/FGF2/CORO1A/CYBA/LCK/CCR7/CXCL9	9
BP	GO:0032869	cellular response to insulin stimulus	13/554	203/18722	0.00758379	0.0429368	0.0297109	CAV2/TRARG1/LEP/ADIPOQ/SOCS3/LPL/GSTP1/SORBS1/PDK4/SOCS1/RARRES2/IGF2/MZB1	13
BP	GO:0051701	biological process involved in interaction with host	13/554	203/18722	0.00758379	0.0429368	0.0297109	GSN/CAV2/CAV1/GAS6/EPHA2/PTX3/EGFR/ICAM1/CD74/WWP1/KRT6A/CLDN1/ANPEP	13
BP	GO:0035282	segmentation	8/554	96/18722	0.00760113	0.0429946	0.0297509	SFRP1/MEOX1/IRX1/OSR1/MEOX2/EGR2/FOXC1/SFRP2	8
BP	GO:0007266	Rho protein signal transduction	10/554	137/18722	0.00762158	0.0430698	0.029803	NGFR/RASIP1/RHOJ/CDC42EP5/MET/PRAG1/F2RL2/CDC42EP1/RHOV/APOE	10
BP	GO:0007520	myoblast fusion	5/554	42/18722	0.00768158	0.0431659	0.0298695	JAM2/IL4R/EHD2/SCGB3A1/CXCL9	5
BP	GO:0045687	positive regulation of glial cell differentiation	5/554	42/18722	0.00768158	0.0431659	0.0298695	IL34/PTN/LIF/TNFRSF1B/EGR2	5
BP	GO:0055090	acylglycerol homeostasis	5/554	42/18722	0.00768158	0.0431659	0.0298695	GPIHBP1/LPL/ANGPTL4/DGAT2/APOE	5
BP	GO:0070328	triglyceride homeostasis	5/554	42/18722	0.00768158	0.0431659	0.0298695	GPIHBP1/LPL/ANGPTL4/DGAT2/APOE	5
BP	GO:1900274	regulation of phospholipase C activity	5/554	42/18722	0.00768158	0.0431659	0.0298695	FGF2/S1PR4/KIT/EGFR/ESR1	5
BP	GO:1904037	positive regulation of epithelial cell apoptotic process	5/554	42/18722	0.00768158	0.0431659	0.0298695	GSN/ECSCR/IL6/AKR1C3/CCL2	5
BP	GO:0002825	regulation of T-helper 1 type immune response	4/554	27/18722	0.00775107	0.0433541	0.0299997	CCL19/ANXA1/IL27RA/IL4R	4
BP	GO:0007263	nitric oxide mediated signal transduction	4/554	27/18722	0.00775107	0.0433541	0.0299997	EGFR/CD36/RASD1/APOE	4
BP	GO:0060142	regulation of syncytium formation by plasma membrane fusion	4/554	27/18722	0.00775107	0.0433541	0.0299997	IL4R/EHD2/SCGB3A1/CXCL9	4
BP	GO:0061437	renal system vasculature development	4/554	27/18722	0.00775107	0.0433541	0.0299997	OSR1/EGR1/PECAM1/ACTA2	4
BP	GO:0061440	kidney vasculature development	4/554	27/18722	0.00775107	0.0433541	0.0299997	OSR1/EGR1/PECAM1/ACTA2	4
BP	GO:1905952	regulation of lipid localization	12/554	181/18722	0.00776277	0.0433794	0.0300172	CAV1/LEP/CIDEA/ADIPOQ/C3/EDN1/C1QTNF1/IL6/LPL/CES1/CD36/APOE	12
BP	GO:0010720	positive regulation of cell development	17/554	298/18722	0.00777555	0.0434105	0.0300387	LIMS2/IL34/CX3CL1/CLDN5/PTN/ADIPOQ/LIF/TNFRSF1B/IL6/EGR2/KIT/MME/EGFR/NEDD9/NTRK2/OLFM4/CXCL12	17
BP	GO:0032768	regulation of monooxygenase activity	6/554	59/18722	0.00780735	0.0434672	0.0300779	CAV1/LEP/CDH3/EGFR/S100A1/APOE	6
BP	GO:0051353	positive regulation of oxidoreductase activity	6/554	59/18722	0.00780735	0.0434672	0.0300779	EDN1/CDH3/EDN3/CYBA/S100A1/APOE	6
BP	GO:0090303	positive regulation of wound healing	6/554	59/18722	0.00780735	0.0434672	0.0300779	SERPINF2/ANXA1/F3/MYLK/CD36/CLDN1	6
BP	GO:0045137	development of primary sexual characteristics	14/554	227/18722	0.00787214	0.0437874	0.0302995	SFRP1/LEP/OSR1/ADAMTS1/PTX3/KIT/YBX3/AKR1C3/FOXC1/CEBPB/ICAM1/FST/SFRP2/ESR1	14
BP	GO:0048017	inositol lipid-mediated signaling	12/554	182/18722	0.0080952	0.0447409	0.0309593	SELP/LEP/EDN1/FGF2/HCST/NOP53/KIT/KLF4/HCLS1/EGFR/CCL5/NTRK2	12
BP	GO:0001757	somite specification	2/554	5/18722	0.00823665	0.0447409	0.0309593	MEOX1/MEOX2	2
BP	GO:0002803	positive regulation of antibacterial peptide production	2/554	5/18722	0.00823665	0.0447409	0.0309593	KLK5/KLK7	2
BP	GO:0002885	positive regulation of hypersensitivity	2/554	5/18722	0.00823665	0.0447409	0.0309593	C3/CCR7	2
BP	GO:0003278	apoptotic process involved in heart morphogenesis	2/554	5/18722	0.00823665	0.0447409	0.0309593	CCN1/FOXC1	2
BP	GO:0009996	negative regulation of cell fate specification	2/554	5/18722	0.00823665	0.0447409	0.0309593	FZD7/SFRP2	2
BP	GO:0019732	antifungal humoral response	2/554	5/18722	0.00823665	0.0447409	0.0309593	LTF/RARRES2	2
BP	GO:0035787	cell migration involved in kidney development	2/554	5/18722	0.00823665	0.0447409	0.0309593	ADIPOQ/VANGL2	2
BP	GO:0042482	positive regulation of odontogenesis	2/554	5/18722	0.00823665	0.0447409	0.0309593	NGFR/EDN1	2
BP	GO:0046813	receptor-mediated virion attachment to host cell	2/554	5/18722	0.00823665	0.0447409	0.0309593	GAS6/ICAM1	2
BP	GO:0051771	negative regulation of nitric-oxide synthase biosynthetic process	2/554	5/18722	0.00823665	0.0447409	0.0309593	EDN1/GSTP1	2
BP	GO:0051799	negative regulation of hair follicle development	2/554	5/18722	0.00823665	0.0447409	0.0309593	NGFR/CDH3	2
BP	GO:0060137	maternal process involved in parturition	2/554	5/18722	0.00823665	0.0447409	0.0309593	EDN1/OXTR	2
BP	GO:0060509	type I pneumocyte differentiation	2/554	5/18722	0.00823665	0.0447409	0.0309593	KLF2/NFIB	2
BP	GO:0060591	chondroblast differentiation	2/554	5/18722	0.00823665	0.0447409	0.0309593	CCN1/FGF2	2
BP	GO:0060687	regulation of branching involved in prostate gland morphogenesis	2/554	5/18722	0.00823665	0.0447409	0.0309593	SFRP1/ESR1	2
BP	GO:0071504	cellular response to heparin	2/554	5/18722	0.00823665	0.0447409	0.0309593	SFRP1/EGR1	2
BP	GO:0071593	lymphocyte aggregation	2/554	5/18722	0.00823665	0.0447409	0.0309593	JAM2/RAC2	2
BP	GO:0071638	negative regulation of monocyte chemotactic protein-1 production	2/554	5/18722	0.00823665	0.0447409	0.0309593	GSTP1/APOD	2
BP	GO:0071895	odontoblast differentiation	2/554	5/18722	0.00823665	0.0447409	0.0309593	FAM20C/CEBPB	2
BP	GO:0072047	proximal/distal pattern formation involved in nephron development	2/554	5/18722	0.00823665	0.0447409	0.0309593	IRX1/OSR1	2
BP	GO:0072081	specification of nephron tubule identity	2/554	5/18722	0.00823665	0.0447409	0.0309593	IRX1/OSR1	2
BP	GO:0090131	mesenchyme migration	2/554	5/18722	0.00823665	0.0447409	0.0309593	ACTG2/ACTA2	2
BP	GO:0097241	hematopoietic stem cell migration to bone marrow	2/554	5/18722	0.00823665	0.0447409	0.0309593	GAS6/JAM2	2
BP	GO:1904447	folate import across plasma membrane	2/554	5/18722	0.00823665	0.0447409	0.0309593	FOLR1/FOLR2	2
BP	GO:2000467	positive regulation of glycogen (starch) synthase activity	2/554	5/18722	0.00823665	0.0447409	0.0309593	ADIPOQ/IGF2	2
BP	GO:0019319	hexose biosynthetic process	7/554	78/18722	0.00826013	0.0447876	0.0309916	GPD1/RBP4/LEP/ADIPOQ/NNMT/ATF3/DGAT2	7
BP	GO:0061045	negative regulation of wound healing	7/554	78/18722	0.00826013	0.0447876	0.0309916	PROS1/SERPINF2/EDN1/C1QTNF1/FGF2/SERPING1/APOE	7
BP	GO:0007548	sex differentiation	16/554	276/18722	0.00833966	0.0451781	0.0312619	SFRP1/TP63/RBP4/LEP/OSR1/ADAMTS1/PTX3/KIT/YBX3/AKR1C3/FOXC1/CEBPB/ICAM1/FST/SFRP2/ESR1	16
BP	GO:0051282	regulation of sequestering of calcium ion	9/554	118/18722	0.00842331	0.0455189	0.0314976	CCL21/CX3CL1/CCL19/FGF2/CORO1A/CYBA/LCK/CCR7/CXCL9	9
BP	GO:0002819	regulation of adaptive immune response	12/554	183/18722	0.00843866	0.0455189	0.0314976	CCL19/CD1C/C3/ANXA1/IL27RA/TNFRSF1B/IL6/IL4R/IL7R/TNFAIP3/CD48/PYCARD	12
BP	GO:0150063	visual system development	20/554	375/18722	0.00844462	0.0455189	0.0314976	CRYAB/RBP4/CHRDL1/PTN/C3/SPRY2/RHOJ/FGF2/EPHA2/SPRY1/VIM/KLF4/TGFBR2/FOXC1/NTRK2/NES/PROM1/C1QA/EFEMP1/CYP1B1	20
BP	GO:0031638	zymogen activation	6/554	60/18722	0.00846364	0.0455189	0.0314976	VSIR/C1R/SERPINF2/CLEC3B/IFI16/PYCARD	6
BP	GO:0031663	lipopolysaccharide-mediated signaling pathway	6/554	60/18722	0.00846364	0.0455189	0.0314976	CX3CL1/LTF/CD36/CCL5/TNFAIP3/CCL2	6
BP	GO:0051851	modulation by host of symbiont process	6/554	60/18722	0.00846364	0.0455189	0.0314976	CAV2/LTF/PTX3/JUN/CCL5/APOE	6
BP	GO:0006509	membrane protein ectodomain proteolysis	5/554	43/18722	0.00848567	0.0455189	0.0314976	MMP7/TNFRSF1B/RGMA/TIMP4/APOE	5
BP	GO:0042088	T-helper 1 type immune response	5/554	43/18722	0.00848567	0.0455189	0.0314976	CCL19/ANXA1/IL27RA/IL4R/RELB	5
BP	GO:0042771	intrinsic apoptotic signaling pathway in response to DNA damage by p53 class mediator	5/554	43/18722	0.00848567	0.0455189	0.0314976	TP63/IFI16/PHLDA3/CD74/PYCARD	5
BP	GO:0046636	negative regulation of alpha-beta T cell activation	5/554	43/18722	0.00848567	0.0455189	0.0314976	VSIR/ANXA1/IL4R/RUNX3/SOCS1	5
BP	GO:0061383	trabecula morphogenesis	5/554	43/18722	0.00848567	0.0455189	0.0314976	SFRP1/RBP4/S1PR1/ADAMTS1/MMP2	5
BP	GO:0042886	amide transport	17/554	301/18722	0.00854694	0.0458067	0.0316968	SFRP1/RBP4/LEP/LTBP4/AQP7/ANXA1/EDN1/IL6/CCN3/EDN3/FOLR1/NNAT/EGFR/CCL5/CD74/FOLR2/S100A8	17
BP	GO:0002313	mature B cell differentiation involved in immune response	4/554	28/18722	0.00883532	0.0470775	0.0325762	MFNG/ITM2A/IL6/GPR183	4
BP	GO:0010464	regulation of mesenchymal cell proliferation	4/554	28/18722	0.00883532	0.0470775	0.0325762	PTN/TGFBR2/WNT11/NFIB	4
BP	GO:0010714	positive regulation of collagen metabolic process	4/554	28/18722	0.00883532	0.0470775	0.0325762	VSIR/SERPINF2/VIM/CCN2	4
BP	GO:0010884	positive regulation of lipid storage	4/554	28/18722	0.00883532	0.0470775	0.0325762	CIDEA/C3/LPL/CD36	4
BP	GO:0061082	myeloid leukocyte cytokine production	4/554	28/18722	0.00883532	0.0470775	0.0325762	KIT/CD36/SPON2/CD74	4
BP	GO:1903020	positive regulation of glycoprotein metabolic process	4/554	28/18722	0.00883532	0.0470775	0.0325762	IL33/CCL21/CCL19/CCR7	4
BP	GO:0060420	regulation of heart growth	7/554	79/18722	0.00883876	0.0470775	0.0325762	RBP4/EDN1/FGF2/PI16/RGS2/TGFBR2/PIM1	7
BP	GO:0010273	detoxification of copper ion	3/554	15/18722	0.00899125	0.0473042	0.032733	MT1M/MT1X/MT1E	3
BP	GO:0010713	negative regulation of collagen metabolic process	3/554	15/18722	0.00899125	0.0473042	0.032733	IL6/CYGB/EMILIN1	3
BP	GO:0016114	terpenoid biosynthetic process	3/554	15/18722	0.00899125	0.0473042	0.032733	AKR1C3/HMGCS2/RBP1	3
BP	GO:0032488	Cdc42 protein signal transduction	3/554	15/18722	0.00899125	0.0473042	0.032733	RHOJ/RHOV/APOE	3
BP	GO:0042976	activation of Janus kinase activity	3/554	15/18722	0.00899125	0.0473042	0.032733	CCL5/SOCS1/PRLR	3
BP	GO:0043508	negative regulation of JUN kinase activity	3/554	15/18722	0.00899125	0.0473042	0.032733	SFRP1/GSTP1/SFRP2	3
BP	GO:0044406	adhesion of symbiont to host	3/554	15/18722	0.00899125	0.0473042	0.032733	GAS6/LTF/ICAM1	3
BP	GO:0050746	regulation of lipoprotein metabolic process	3/554	15/18722	0.00899125	0.0473042	0.032733	LEP/APOD/DGAT2	3
BP	GO:0072224	metanephric glomerulus development	3/554	15/18722	0.00899125	0.0473042	0.032733	OSR1/ADIPOQ/EGR1	3
BP	GO:0098760	response to interleukin-7	3/554	15/18722	0.00899125	0.0473042	0.032733	LSP1/IL7R/IL2RG	3
BP	GO:0098761	cellular response to interleukin-7	3/554	15/18722	0.00899125	0.0473042	0.032733	LSP1/IL7R/IL2RG	3
BP	GO:1990169	stress response to copper ion	3/554	15/18722	0.00899125	0.0473042	0.032733	MT1M/MT1X/MT1E	3
BP	GO:2000345	regulation of hepatocyte proliferation	3/554	15/18722	0.00899125	0.0473042	0.032733	LIMS2/PTN/TNFAIP3	3
BP	GO:2000402	negative regulation of lymphocyte migration	3/554	15/18722	0.00899125	0.0473042	0.032733	IL27RA/APOD/CCL2	3
BP	GO:0051153	regulation of striated muscle cell differentiation	8/554	99/18722	0.00909315	0.0477569	0.0330463	EDN1/CCN3/PI16/BHLHE41/RGS2/TMEM119/FZD7/CEACAM5	8
BP	GO:0060291	long-term synaptic potentiation	8/554	99/18722	0.00909315	0.0477569	0.0330463	S100B/PTN/FAM107A/MME/PRNP/NTRK2/CALB2/APOE	8
BP	GO:0032620	interleukin-17 production	5/554	44/18722	0.00934618	0.0489577	0.0338772	VSIR/IL27RA/IL6/PRNP/SPHK1	5
BP	GO:0032660	regulation of interleukin-17 production	5/554	44/18722	0.00934618	0.0489577	0.0338772	VSIR/IL27RA/IL6/PRNP/SPHK1	5
BP	GO:0050999	regulation of nitric-oxide synthase activity	5/554	44/18722	0.00934618	0.0489577	0.0338772	CAV1/LEP/EGFR/S100A1/APOE	5
BP	GO:0031345	negative regulation of cell projection organization	12/554	186/18722	0.00953772	0.0498743	0.0345115	CCL21/ID1/SPRY2/VIM/SEMA3G/RGMA/ITM2C/PRAG1/PRNP/TACSTD2/KLK8/APOE	12
BP	GO:0071478	cellular response to radiation	12/554	186/18722	0.00953772	0.0498743	0.0345115	SFRP1/CRYAB/PTN/AQP1/MFAP4/EGR1/IFI16/MME/CYBA/MMP3/MMP2/SFRP2	12
CC	GO:0062023	collagen-containing extracellular matrix	76/580	425/19549	1.41635e-37	6.75597e-35	5.27775e-35	COL17A1/LAMB3/SFRP1/SOD3/TINAGL1/ITIH5/FBLN5/PTN/LTBP4/SERPINF2/MFAP4/ADIPOQ/TNXB/ITGB4/ANXA1/ADAMTS1/MMRN1/LAMC2/CCN1/A2M/MMRN2/SERPING1/SLPI/CCN3/CTSG/F3/COL16A1/PRELP/FBLN2/LTBP2/ELN/CLEC14A/VWF/MFGE8/COL14A1/SRPX/SPARCL1/ANGPTL4/COL18A1/TNN/DPT/MATN2/CLEC3B/DST/LGALS3/CCN2/EGFL7/EMILIN1/ICAM1/FBLN1/RARRES2/CXCL12/CCDC80/SCARA3/COL9A2/PODN/COL6A2/MGP/TNC/C1QA/THBS4/OGN/S100A6/APOE/MMP2/EFEMP1/…	76
CC	GO:0009897	external side of plasma membrane	54/580	421/19549	8.3903e-20	2.00109e-17	1.56325e-17	IGHA2/SELP/IGHA1/CD1C/GPIHBP1/S1PR1/CD79B/ANXA1/IL27RA/SCARA5/F3/BTNL9/CLEC14A/MFGE8/IGHD/KIT/FOLR1/IGKC/IGLC2/IGLC3/TRBC2/PRNP/CD3D/TGFBR2/CD79A/CD69/TF/CD36/IL7R/CD27/CD3E/IGHM/IGLL5/CD48/CCR7/VTCN1/ICAM1/IL2RG/CXCL12/CD2/CRLF1/IGHG2/CD74/FOLR2/CD8A/IGLC7/PRLR/IGHG1/IGHG3/ANPEP/KCNJ3/CEACAM5/CXCL9/IGHG4	54
CC	GO:0072562	blood microparticle	26/580	146/19549	1.71624e-13	2.72883e-11	2.13176e-11	GSN/IGHA2/IGHA1/C1R/PROS1/ACTG2/SERPINF2/JCHAIN/C3/A2M/SERPING1/C1S/IGHD/ANGPTL4/IGKC/IGLC2/IGLC3/TF/IGHM/IGHG2/HBB/APOE/CFB/IGHG1/IGHG3/IGHG4	26
CC	GO:0031983	vesicle lumen	35/580	327/19549	5.76736e-11	6.87758e-09	5.37275e-09	GSN/PROS1/SERPINF2/GAS6/C3/CHI3L1/MMRN1/CNN2/A2M/SERPING1/SLPI/CTSG/GSTP1/GMFG/LTF/VWF/PTX3/CLEC3B/EGFR/TF/LCN2/CFD/CXCL1/COTL1/SRGN/OLFM4/CTSW/RARRES2/CRISPLD2/TCN1/PYCARD/IGF2/S100A9/S100A8/S100A7	35
CC	GO:0034774	secretory granule lumen	34/580	322/19549	1.57395e-10	1.50154e-08	1.173e-08	GSN/PROS1/SERPINF2/GAS6/C3/CHI3L1/MMRN1/CNN2/A2M/SERPING1/SLPI/CTSG/GSTP1/GMFG/LTF/VWF/PTX3/CLEC3B/TF/LCN2/CFD/CXCL1/COTL1/SRGN/OLFM4/CTSW/RARRES2/CRISPLD2/TCN1/PYCARD/IGF2/S100A9/S100A8/S100A7	34
CC	GO:0060205	cytoplasmic vesicle lumen	34/580	325/19549	2.01984e-10	1.60577e-08	1.25443e-08	GSN/PROS1/SERPINF2/GAS6/C3/CHI3L1/MMRN1/CNN2/A2M/SERPING1/SLPI/CTSG/GSTP1/GMFG/LTF/VWF/PTX3/CLEC3B/TF/LCN2/CFD/CXCL1/COTL1/SRGN/OLFM4/CTSW/RARRES2/CRISPLD2/TCN1/PYCARD/IGF2/S100A9/S100A8/S100A7	34
CC	GO:0042571	immunoglobulin complex, circulating	16/580	77/19549	7.51557e-10	5.12132e-08	4.00077e-08	IGHA2/IGHA1/JCHAIN/IGHD/IGKC/IGLC2/IGLC3/TRBC2/PIGR/IGHM/IGLL5/IGHG2/IGLC7/IGHG1/IGHG3/IGHG4	16
CC	GO:0005911	cell-cell junction	40/580	494/19549	1.02426e-08	6.10715e-07	4.77089e-07	COL17A1/NGFR/CLDN11/TRIM29/LIMS2/FAT2/SYNM/CADM3/CLDN5/PDLIM4/DSG3/SCN4B/DSC3/AQP7/SYNPO/RASIP1/ANXA1/CNN2/JAM2/PDLIM7/EPHA2/CCN3/SORBS1/CDH3/KIT/YBX3/PECAM1/PKP1/CORO1A/CD3E/CDC42EP1/OXTR/FSCN1/CD2/SHROOM1/PDLIM1/CALB2/VANGL2/CLDN1/CNTNAP2	40
CC	GO:0005604	basement membrane	15/580	96/19549	1.44537e-07	7.66045e-06	5.98433e-06	COL17A1/LAMB3/PTN/ITGB4/ADAMTS1/LAMC2/MMRN2/COL18A1/DST/FBLN1/CCDC80/TNC/THBS4/NTN4/NPNT	15
CC	GO:0030055	cell-substrate junction	33/580	425/19549	5.32189e-07	2.53854e-05	1.9831e-05	COL17A1/GSN/LIMS2/CAV2/CNN1/CAV1/ITGB4/ANXA1/CNN2/FAM107A/PDLIM7/EPHA2/FHL1/CPNE3/SORBS1/TNS1/VIM/PRAG1/RAC2/MME/DST/FBLIM1/EGFR/RND3/CYBA/NEDD9/CDC42EP1/TNS4/MRC2/ICAM1/PDLIM1/TNC/S100A7	33
CC	GO:0032432	actin filament bundle	13/580	80/19549	6.15468e-07	2.66889e-05	2.08494e-05	CRYAB/PDLIM4/SYNPO/CNN2/FAM107A/PDLIM7/MYL9/MYLK/SORBS1/FBLIM1/CYBA/FSCN1/PDLIM1	13
CC	GO:0005811	lipid droplet	14/580	96/19549	8.94891e-07	3.42594e-05	2.67634e-05	CLDN11/G0S2/CIDEC/PLIN4/CAV1/PLIN1/FABP4/CIDEA/AQP7/LIPE/GIMAP7/CES1/DGAT2/RBP1	14
CC	GO:0001725	stress fiber	12/580	71/19549	1.0771e-06	3.42594e-05	2.67634e-05	PDLIM4/SYNPO/CNN2/FAM107A/PDLIM7/MYL9/MYLK/SORBS1/FBLIM1/CYBA/FSCN1/PDLIM1	12
CC	GO:0097517	contractile actin filament bundle	12/580	71/19549	1.0771e-06	3.42594e-05	2.67634e-05	PDLIM4/SYNPO/CNN2/FAM107A/PDLIM7/MYL9/MYLK/SORBS1/FBLIM1/CYBA/FSCN1/PDLIM1	12
CC	GO:0005925	focal adhesion	32/580	418/19549	1.07734e-06	3.42594e-05	2.67634e-05	GSN/LIMS2/CAV2/CNN1/CAV1/ITGB4/ANXA1/CNN2/FAM107A/PDLIM7/EPHA2/FHL1/CPNE3/SORBS1/TNS1/VIM/PRAG1/RAC2/MME/DST/FBLIM1/EGFR/RND3/CYBA/NEDD9/CDC42EP1/TNS4/MRC2/ICAM1/PDLIM1/TNC/S100A7	32
CC	GO:0019814	immunoglobulin complex	18/580	167/19549	2.48978e-06	7.42265e-05	5.79856e-05	IGHA2/IGHA1/JCHAIN/CD79B/IGHD/IGKC/IGLC2/IGLC3/TRBC2/CD79A/PIGR/IGHM/IGLL5/IGHG2/IGLC7/IGHG1/IGHG3/IGHG4	18
CC	GO:0031091	platelet alpha granule	13/580	91/19549	2.77946e-06	7.79884e-05	6.09244e-05	SELP/PROS1/SERPINF2/GAS6/MMRN1/A2M/SERPING1/VWF/PECAM1/CD36/CFD/SRGN/IGF2	13
CC	GO:0071745	IgA immunoglobulin complex	4/580	5/19549	3.74502e-06	8.11987e-05	6.34323e-05	IGHA2/IGHA1/JCHAIN/PIGR	4
CC	GO:0071746	IgA immunoglobulin complex, circulating	4/580	5/19549	3.74502e-06	8.11987e-05	6.34323e-05	IGHA2/IGHA1/JCHAIN/PIGR	4
CC	GO:0071749	polymeric IgA immunoglobulin complex	4/580	5/19549	3.74502e-06	8.11987e-05	6.34323e-05	IGHA2/IGHA1/JCHAIN/PIGR	4
CC	GO:0071751	secretory IgA immunoglobulin complex	4/580	5/19549	3.74502e-06	8.11987e-05	6.34323e-05	IGHA2/IGHA1/JCHAIN/PIGR	4
CC	GO:0071953	elastic fiber	4/580	5/19549	3.74502e-06	8.11987e-05	6.34323e-05	FBLN5/MFAP4/ELN/FBLN1	4
CC	GO:0042641	actomyosin	12/580	81/19549	4.54384e-06	9.42352e-05	7.36164e-05	PDLIM4/SYNPO/CNN2/FAM107A/PDLIM7/MYL9/MYLK/SORBS1/FBLIM1/CYBA/FSCN1/PDLIM1	12
CC	GO:0005581	collagen trimer	12/580	87/19549	9.69525e-06	0.000192693	0.000150531	COL17A1/ADIPOQ/C1QTNF1/COL16A1/COL14A1/COL18A1/EMILIN1/SCARA3/COL9A2/COL6A2/C1QA/COL11A1	12
CC	GO:0071750	dimeric IgA immunoglobulin complex	3/580	3/19549	2.59853e-05	0.000467865	0.000365495	IGHA2/IGHA1/JCHAIN	3
CC	GO:0071752	secretory dimeric IgA immunoglobulin complex	3/580	3/19549	2.59853e-05	0.000467865	0.000365495	IGHA2/IGHA1/JCHAIN	3
CC	GO:0031093	platelet alpha granule lumen	10/580	67/19549	2.64829e-05	0.000467865	0.000365495	PROS1/SERPINF2/GAS6/MMRN1/A2M/SERPING1/VWF/CFD/SRGN/IGF2	10
CC	GO:0005901	caveola	11/580	84/19549	3.72645e-05	0.000634828	0.000495926	CAVIN2/CAV2/CAV1/CAVIN1/PLPP1/LIPE/CAVIN3/SORBS1/EHD2/TGFBR2/CD36	11
CC	GO:0031233	intrinsic component of external side of plasma membrane	6/580	24/19549	5.6685e-05	0.000932371	0.000728366	GPIHBP1/F3/FOLR1/PRNP/FOLR2/CEACAM5	6
CC	GO:0005788	endoplasmic reticulum lumen	23/580	313/19549	6.57312e-05	0.00102023	0.000797005	COL17A1/CHRDL1/GAS6/C3/EDN1/CCN1/IL6/SERPING1/COL16A1/MFGE8/FAM20C/COL14A1/CES1/SPARCL1/COL18A1/TF/COL9A2/COL6A2/TNC/APOE/COL11A1/MZB1/MSLN	23
CC	GO:0045121	membrane raft	24/580	335/19549	6.84433e-05	0.00102023	0.000797005	CAVIN2/CAV2/CAV1/CAVIN1/S1PR1/PLPP1/LIPE/TNFRSF1B/CAVIN3/SORBS1/PECAM1/MME/PRNP/EHD2/EGFR/TGFBR2/CD79A/CD36/LCK/CD48/ICAM1/BIRC3/CD2/CD8A	24
CC	GO:0098857	membrane microdomain	24/580	335/19549	6.84433e-05	0.00102023	0.000797005	CAVIN2/CAV2/CAV1/CAVIN1/S1PR1/PLPP1/LIPE/TNFRSF1B/CAVIN3/SORBS1/PECAM1/MME/PRNP/EHD2/EGFR/TGFBR2/CD79A/CD36/LCK/CD48/ICAM1/BIRC3/CD2/CD8A	24
CC	GO:0035580	specific granule lumen	9/580	62/19549	8.35958e-05	0.00120834	0.000943953	CHI3L1/CNN2/SLPI/LTF/PTX3/LCN2/CXCL1/OLFM4/TCN1	9
CC	GO:0035976	transcription factor AP-1 complex	3/580	4/19549	0.00010164	0.00138521	0.00108212	JUNB/JUN/FOS	3
CC	GO:0071748	monomeric IgA immunoglobulin complex	3/580	4/19549	0.00010164	0.00138521	0.00108212	IGHA2/IGHA1/JCHAIN	3
CC	GO:0044853	plasma membrane raft	12/580	116/19549	0.000172614	0.00228713	0.0017867	CAVIN2/CAV2/CAV1/CAVIN1/PLPP1/LIPE/CAVIN3/SORBS1/EHD2/TGFBR2/CD36/CD8A	12
CC	GO:0043292	contractile fiber	18/580	239/19549	0.000295461	0.00380906	0.00297563	MYH11/CRYAB/SYNM/PDLIM4/SYNPO/LMOD1/TPM2/PDLIM7/MYL9/ACTA2/TIMP4/DST/TNNI2/FBXO32/PDLIM1/S100A1/MMP2/NPNT	18
CC	GO:0005593	FACIT collagen trimer	3/580	6/19549	0.000485994	0.00594408	0.0046435	COL16A1/COL14A1/COL9A2	3
CC	GO:0030056	hemidesmosome	3/580	6/19549	0.000485994	0.00594408	0.0046435	COL17A1/ITGB4/DST	3
CC	GO:0031225	anchored component of membrane	14/580	170/19549	0.000562297	0.00670539	0.00523824	GPIHBP1/ALPL/RGMA/FOLR1/PRNP/NRN1/CD52/CD48/GAS1/CD2/FOLR2/LY6D/MSLN/CEACAM5	14
CC	GO:0005882	intermediate filament	16/580	217/19549	0.000790749	0.00919968	0.00718678	KRT17/KRT14/KRT5/CLDN11/KRT6B/SYNM/KRT15/KRT16/VIM/PKP1/DST/KRT81/KRT7/NES/KRT23/KRT6A	16
CC	GO:0002095	caveolar macromolecular signaling complex	2/580	2/19549	0.000878779	0.00974832	0.00761537	CAV2/CAV1	2
CC	GO:0030485	smooth muscle contractile fiber	2/580	2/19549	0.000878779	0.00974832	0.00761537	ACTA2/NPNT	2
CC	GO:0042581	specific granule	13/580	160/19549	0.00099145	0.0107482	0.00839649	CHI3L1/CNN2/TNFRSF1B/SLPI/ANXA3/LTF/PTX3/CYBA/CD36/LCN2/CXCL1/OLFM4/TCN1	13
CC	GO:1904724	tertiary granule lumen	7/580	55/19549	0.00115227	0.012214	0.00954158	CNN2/LTF/PTX3/CXCL1/OLFM4/HBB/TCN1	7
CC	GO:0005912	adherens junction	13/580	170/19549	0.00172019	0.0178376	0.0139347	TRIM29/FAT2/SYNM/PDLIM4/ANXA1/PDLIM7/SORBS1/CDH3/PKP1/CDC42EP1/OXTR/SHROOM1/PDLIM1	13
CC	GO:0001772	immunological synapse	6/580	44/19549	0.00179886	0.0182565	0.0142619	CORO1A/LGALS3/CD3E/LCK/GZMA/ICAM1	6
CC	GO:0045111	intermediate filament cytoskeleton	17/580	258/19549	0.00188499	0.0186491	0.0145687	KRT17/KRT14/KRT5/CLDN11/KRT6B/SYNM/KRT15/KRT16/VIM/PKP1/DST/KRT81/KRT7/NES/KRT23/KRT6A/S100A8	17
CC	GO:0030666	endocytic vesicle membrane	14/580	193/19549	0.00191574	0.0186491	0.0145687	CAV1/ANXA3/RAB7B/RAC2/CORO1A/CD3D/EGFR/CYBA/TF/CD36/IL7R/CD74/APOE/AREG	14
CC	GO:0005884	actin filament	10/580	114/19549	0.00210214	0.0200544	0.0156665	PDLIM4/LMOD1/ANXA1/TPM2/PDLIM7/HCLS1/RAC2/CORO1A/COTL1/PDLIM1	10
CC	GO:0031362	anchored component of external side of plasma membrane	4/580	20/19549	0.00254446	0.0223252	0.0174404	GPIHBP1/FOLR1/PRNP/FOLR2	4
CC	GO:0046658	anchored component of plasma membrane	7/580	63/19549	0.00256365	0.0223252	0.0174404	GPIHBP1/FOLR1/PRNP/NRN1/GAS1/CD2/FOLR2	7
CC	GO:0071753	IgM immunoglobulin complex	2/580	3/19549	0.00258437	0.0223252	0.0174404	JCHAIN/IGHM	2
CC	GO:0071754	IgM immunoglobulin complex, circulating	2/580	3/19549	0.00258437	0.0223252	0.0174404	JCHAIN/IGHM	2
CC	GO:0071756	pentameric IgM immunoglobulin complex	2/580	3/19549	0.00258437	0.0223252	0.0174404	JCHAIN/IGHM	2
CC	GO:0030139	endocytic vesicle	20/580	336/19549	0.00262688	0.0223252	0.0174404	SAA1/CAV1/ANXA3/LTF/RAB7B/VIM/RAC2/CORO1A/CD3D/EHD2/EGFR/CYBA/TF/CD36/IL7R/SPHK1/HBB/CD74/APOE/AREG	20
CC	GO:0005614	interstitial matrix	3/580	10/19549	0.00266779	0.0223252	0.0174404	COL14A1/CCDC80/TNC	3
CC	GO:0042827	platelet dense granule	4/580	21/19549	0.00307025	0.0252501	0.0197254	SELP/CLEC3B/CTSW/RARRES2	4
CC	GO:0045178	basal part of cell	17/580	276/19549	0.00377998	0.0305602	0.0238736	KRT14/CLDN11/CD300LG/GPIHBP1/AQP1/AQP7/ITGB4/ANXA1/EDN1/MET/FOLR1/DST/EGFR/TACSTD2/TF/CLDN1/CEACAM5	17
CC	GO:0030016	myofibril	15/580	231/19549	0.00389563	0.0309703	0.0241939	CRYAB/SYNM/PDLIM4/SYNPO/LMOD1/TPM2/PDLIM7/MYL9/TIMP4/DST/TNNI2/FBXO32/PDLIM1/S100A1/MMP2	15
CC	GO:0030017	sarcomere	14/580	211/19549	0.00430132	0.0333481	0.0260515	CRYAB/PDLIM4/SYNPO/LMOD1/TPM2/PDLIM7/MYL9/TIMP4/DST/TNNI2/FBXO32/PDLIM1/S100A1/MMP2	14
CC	GO:0071682	endocytic vesicle lumen	4/580	23/19549	0.00433455	0.0333481	0.0260515	SAA1/LTF/HBB/APOE	4
CC	GO:0043256	laminin complex	3/580	12/19549	0.00467914	0.0354278	0.0276761	LAMB3/LAMC2/NTN4	3
CC	GO:0005938	cell cortex	18/580	308/19549	0.00506566	0.0366213	0.0286085	GSN/GYPC/CLDN5/CAV1/AQP7/LAMC2/MYL9/HCLS1/RAC2/DST/CORO1A/CCN2/RND3/NEDD9/FSCN1/COTL1/SHROOM1/CALB2	18
CC	GO:0019815	B cell receptor complex	2/580	4/19549	0.00506709	0.0366213	0.0286085	CD79B/CD79A	2
CC	GO:0097209	epidermal lamellar body	2/580	4/19549	0.00506709	0.0366213	0.0286085	KLK5/KLK7	2
CC	GO:0030669	clathrin-coated endocytic vesicle membrane	7/580	72/19549	0.00543578	0.0386995	0.030232	CD3D/EGFR/TF/IL7R/CD74/APOE/AREG	7
MF	GO:0005201	extracellular matrix structural constituent	39/560	172/18367	3.39765e-23	3.25495e-20	2.58937e-20	COL17A1/LAMB3/TINAGL1/FBLN5/LTBP4/MFAP4/ADIPOQ/TNXB/CHI3L1/MMRN1/LAMC2/CCN1/MMRN2/COL16A1/PRELP/FBLN2/LTBP2/ELN/VWF/MFGE8/COL14A1/SRPX/COL18A1/DPT/MATN2/EMILIN1/FBLN1/COL9A2/PODN/COL6A2/MGP/TNC/OGN/EFEMP1/FMOD/COL11A1/CILP/TFPI2/NPNT	39
MF	GO:0005539	glycosaminoglycan binding	36/560	230/18367	5.71783e-16	2.73884e-13	2.17879e-13	SAA1/SFRP1/SOD3/SELP/PTN/MMP7/LTBP4/JCHAIN/TNXB/ADAMTS1/LAMC2/CCN1/FGF2/EVA1C/CCN3/CTSG/PCOLCE2/LPL/PRELP/LTBP2/HAPLN3/LTF/SPOCK2/CLEC3B/PRNP/CCN2/TGFBR2/LGR6/IGHM/CCDC80/CRISPLD2/SELL/THBS4/APOE/COL11A1/CXCL13	36
MF	GO:0008201	heparin binding	29/560	166/18367	2.21902e-14	7.01786e-12	5.58283e-12	SAA1/SFRP1/SOD3/SELP/PTN/MMP7/TNXB/ADAMTS1/LAMC2/CCN1/FGF2/EVA1C/CCN3/CTSG/PCOLCE2/LPL/PRELP/LTBP2/LTF/CLEC3B/CCN2/LGR6/CCDC80/CRISPLD2/SELL/THBS4/APOE/COL11A1/CXCL13	29
MF	GO:0005178	integrin binding	27/560	144/18367	2.93021e-14	7.01786e-12	5.58283e-12	CX3CL1/ICAM2/FBLN5/PTN/LTBP4/TNXB/ITGB4/JAM2/CCN1/FGF2/CCN3/COL16A1/VWF/MFGE8/TNN/DST/CCN2/EGFR/LGALS12/EMILIN1/ICAM1/FBLN1/CXCL12/THBS4/SFRP2/IGF2/NPNT	27
MF	GO:0048018	receptor ligand activity	47/560	487/18367	2.9134e-12	5.58207e-10	4.44063e-10	IL33/CCL14/IL34/CCL21/CX3CL1/CCL19/CXCL2/PTN/LEP/ADIPOQ/GAS6/IL17B/EDN1/FGF2/LIF/IL6/CCN3/GMFG/MIA/EDN3/CCL28/CMTM7/SEMA3G/LTB/NMB/LGALS3/CCN2/CCL17/CCL5/CXCL1/CCL22/CXCL12/WNT11/CRLF1/CCL2/SCGB3A1/IL32/THBS4/OGN/EFEMP1/SFRP2/IGF2/AREG/CXCL14/TFF1/CXCL9/CXCL13	47
MF	GO:0030546	signaling receptor activator activity	47/560	495/18367	5.19288e-12	8.2913e-10	6.59587e-10	IL33/CCL14/IL34/CCL21/CX3CL1/CCL19/CXCL2/PTN/LEP/ADIPOQ/GAS6/IL17B/EDN1/FGF2/LIF/IL6/CCN3/GMFG/MIA/EDN3/CCL28/CMTM7/SEMA3G/LTB/NMB/LGALS3/CCN2/CCL17/CCL5/CXCL1/CCL22/CXCL12/WNT11/CRLF1/CCL2/SCGB3A1/IL32/THBS4/OGN/EFEMP1/SFRP2/IGF2/AREG/CXCL14/TFF1/CXCL9/CXCL13	47
MF	GO:0008009	chemokine activity	15/560	49/18367	9.195e-12	1.2584e-09	1.00108e-09	CCL14/CCL21/CX3CL1/CCL19/CXCL2/CCL28/CCL17/CCL5/CXCL1/CCL22/CXCL12/CCL2/CXCL14/CXCL9/CXCL13	15
MF	GO:0005125	cytokine activity	30/560	235/18367	3.38293e-11	4.05106e-09	3.22269e-09	IL33/CCL14/IL34/CCL21/CX3CL1/CCL19/CXCL2/ADIPOQ/IL17B/EDN1/FGF2/LIF/IL6/CCL28/CMTM7/LTB/CCL17/CCL5/CXCL1/CCL22/CXCL12/WNT11/CRLF1/CCL2/SCGB3A1/IL32/AREG/CXCL14/CXCL9/CXCL13	30
MF	GO:0042379	chemokine receptor binding	17/560	72/18367	3.83011e-11	4.07694e-09	3.24327e-09	CCL14/CCL21/CX3CL1/CCL19/CXCL2/DEFB1/CCL28/CCL17/CCL5/CXCL1/CCL22/CXCL12/NES/CCL2/CXCL14/CXCL9/CXCL13	17
MF	GO:0061134	peptidase regulator activity	29/560	230/18367	9.78244e-11	9.37158e-09	7.45525e-09	VSIR/ITIH5/CAV1/PROS1/SERPINF2/SERPINB5/GAS6/C3/PAPLN/A2M/SERPING1/SLPI/PI16/PCOLCE2/LTF/SPOCK2/TIMP4/PRNP/RARRES1/PI3/CD27/CST7/OPRPN/FBLN1/BIRC3/PYCARD/SFRP2/WFDC2/TFPI2	29
MF	GO:1901681	sulfur compound binding	31/560	265/18367	1.50371e-10	1.30959e-08	1.0418e-08	SAA1/SFRP1/SOD3/SELP/PTN/MMP7/TNXB/ADAMTS1/LAMC2/CCN1/FGF2/EVA1C/CCN3/CTSG/PCOLCE2/LPL/GSTP1/PRELP/LTBP2/LTF/CLEC3B/CCN2/LGR6/CCDC80/CRISPLD2/FST/SELL/THBS4/APOE/COL11A1/CXCL13	31
MF	GO:0061135	endopeptidase regulator activity	24/560	194/18367	6.00512e-09	4.79409e-07	3.81378e-07	VSIR/ITIH5/PROS1/SERPINF2/SERPINB5/GAS6/C3/PAPLN/A2M/SERPING1/SLPI/LTF/SPOCK2/TIMP4/PRNP/RARRES1/PI3/CD27/CST7/OPRPN/BIRC3/SFRP2/WFDC2/TFPI2	24
MF	GO:0034987	immunoglobulin receptor binding	15/560	79/18367	1.35279e-08	9.5309e-07	7.58199e-07	IGHA2/IGHA1/JCHAIN/IGHD/IGKC/IGLC2/IGLC3/TRBC2/IGHM/IGLL5/IGHG2/IGLC7/IGHG1/IGHG3/IGHG4	15
MF	GO:0030414	peptidase inhibitor activity	23/560	187/18367	1.39282e-08	9.5309e-07	7.58199e-07	ITIH5/PROS1/SERPINF2/SERPINB5/GAS6/C3/PAPLN/A2M/SERPING1/SLPI/PI16/LTF/SPOCK2/TIMP4/PRNP/RARRES1/PI3/CD27/CST7/OPRPN/BIRC3/WFDC2/TFPI2	23
MF	GO:0004252	serine-type endopeptidase activity	22/560	174/18367	1.72939e-08	1.1045e-06	8.78652e-07	C1R/CFI/MMP7/KLK5/C1S/CTSG/F3/KLK7/LTF/GZMM/KLK10/KLK6/TMPRSS3/MMP3/CFD/GZMK/GZMA/KLK8/MMP2/KLK11/CFB/TPSAB1	22
MF	GO:0008236	serine-type peptidase activity	23/560	191/18367	2.08609e-08	1.24904e-06	9.93636e-07	C1R/CFI/MMP7/KLK5/C1S/CTSG/F3/KLK7/LTF/GZMM/KLK10/KLK6/TMPRSS3/MMP3/CFD/SCPEP1/GZMK/GZMA/KLK8/MMP2/KLK11/CFB/TPSAB1	23
MF	GO:0017171	serine hydrolase activity	23/560	195/18367	3.08901e-08	1.62696e-06	1.29428e-06	C1R/CFI/MMP7/KLK5/C1S/CTSG/F3/KLK7/LTF/GZMM/KLK10/KLK6/TMPRSS3/MMP3/CFD/SCPEP1/GZMK/GZMA/KLK8/MMP2/KLK11/CFB/TPSAB1	23
MF	GO:0001664	G protein-coupled receptor binding	29/560	295/18367	3.19142e-08	1.62696e-06	1.29428e-06	SAA1/SFRP1/CCL14/CCL21/CX3CL1/CCL19/CXCL2/S1PR1/C3/ITGB4/EDN1/DEFB1/EDN3/CCL28/NMB/PRNP/CCL17/CCL5/FZD7/CXCL1/CCL22/CXCL12/NES/WNT11/CCL2/CXCL14/PPP1R1B/CXCL9/CXCL13	29
MF	GO:0004866	endopeptidase inhibitor activity	22/560	180/18367	3.22675e-08	1.62696e-06	1.29428e-06	ITIH5/PROS1/SERPINF2/SERPINB5/GAS6/C3/PAPLN/A2M/SERPING1/SLPI/LTF/SPOCK2/TIMP4/PRNP/RARRES1/PI3/CD27/CST7/OPRPN/BIRC3/WFDC2/TFPI2	22
MF	GO:0048020	CCR chemokine receptor binding	11/560	48/18367	1.55818e-07	7.46369e-06	5.93749e-06	CCL14/CCL21/CX3CL1/CCL19/DEFB1/CCL17/CCL5/CCL22/NES/CCL2/CXCL13	11
MF	GO:0005126	cytokine receptor binding	26/560	271/18367	2.66472e-07	1.21562e-05	9.67045e-06	CCL14/IL34/CCL21/CX3CL1/CCL19/CXCL2/IL27RA/LIF/IL6/DEFB1/CCL28/LTB/TGFBR2/CCL17/CCL5/CXCL1/CCL22/CXCL12/NES/CRLF1/CCL2/PRLR/PYCARD/CXCL14/CXCL9/CXCL13	26
MF	GO:0003823	antigen binding	20/560	171/18367	2.81189e-07	1.22445e-05	9.7407e-06	IGHA2/IGHA1/CD1C/MFAP4/JCHAIN/IGHD/IGKC/IGLC2/IGLC3/TRBC2/IL7R/SPON2/IGHM/IGLL5/CD48/IGHG2/IGLC7/IGHG1/IGHG3/IGHG4	20
MF	GO:0019838	growth factor binding	18/560	141/18367	2.97443e-07	1.23891e-05	9.85577e-06	NGFR/PTN/LTBP4/ITGB4/CCN1/A2M/IGFBP6/EPHA2/CCN3/LTBP2/CCN2/EGFR/TGFBR2/CD36/DUSP1/NTRK2/IL2RG/CXCL13	18
MF	GO:0019955	cytokine binding	16/560	139/18367	5.33909e-06	0.000213119	0.000169539	ACKR1/LTBP4/IL27RA/A2M/FGF2/TNFRSF1B/ZFP36/KIT/TGFBR2/CD36/CCR7/IL2RG/SOSTDC1/CRLF1/CD74/PRLR	16
MF	GO:0050840	extracellular matrix binding	10/560	56/18367	6.45372e-06	0.000247306	0.000196736	TINAGL1/CCN1/FBLN2/ELN/CLEC14A/SPARCL1/SPOCK2/LGALS3/COL11A1/NTN4	10
MF	GO:0004175	endopeptidase activity	31/560	430/18367	9.2439e-06	0.000340463	0.000270844	SFRP1/C1R/TRABD2B/CFI/MMP7/KLK5/PAPLN/ADAMTS1/C1S/CTSG/F3/KLK7/LTF/GZMM/KLK10/KLK6/MME/TMPRSS3/MMP3/CFD/GZMK/CTSW/GZMA/KLK8/PYCARD/MMP2/KLK11/CFB/TPSAB1/PYDC1/PIP	31
MF	GO:0008083	growth factor activity	17/560	162/18367	9.59552e-06	0.000340463	0.000270844	IL34/PTN/FGF2/LIF/IL6/CCN3/GMFG/MIA/CCN2/CXCL1/CXCL12/THBS4/OGN/EFEMP1/IGF2/AREG/TFF1	17
MF	GO:0045236	CXCR chemokine receptor binding	6/560	18/18367	1.06192e-05	0.000363327	0.000289033	CX3CL1/CXCL2/CXCL1/CXCL12/CXCL9/CXCL13	6
MF	GO:0048306	calcium-dependent protein binding	12/560	88/18367	1.42792e-05	0.000471706	0.00037525	S100B/SELP/ANXA1/A2M/S100A2/CPNE3/ANXA3/S100A1/S100A6/S100A9/S100A8/S100A7	12
MF	GO:0019215	intermediate filament binding	5/560	15/18367	6.03016e-05	0.00192563	0.00153187	KRT14/SYNM/VIM/PKP1/NES	5
MF	GO:0030023	extracellular matrix constituent conferring elasticity	4/560	9/18367	9.53476e-05	0.00294655	0.00234403	FBLN5/FBLN2/ELN/EMILIN1	4
MF	GO:0031705	bombesin receptor binding	3/560	4/18367	0.000110219	0.00329968	0.00262495	EDN1/EDN3/NMB	3
MF	GO:0050786	RAGE receptor binding	4/560	10/18367	0.000155083	0.0045021	0.00358149	S100B/S100A9/S100A8/S100A7	4
MF	GO:0003779	actin binding	28/560	440/18367	0.00021351	0.00589684	0.00469104	GSN/CNN1/MYH11/PDLIM4/SYNPO/TAGLN/LMOD1/CNN2/FAM107A/TPM2/PDLIM7/MYLK/GMFG/SORBS1/TNS1/LSP1/HCLS1/DST/CORO1A/EGFR/TNNI2/FSCN1/FXYD5/TNS4/COTL1/SHROOM1/PDLIM1/PIP	28
MF	GO:0030020	extracellular matrix structural constituent conferring tensile strength	7/560	41/18367	0.000215438	0.00589684	0.00469104	COL17A1/COL16A1/COL14A1/COL18A1/COL9A2/COL6A2/COL11A1	7
MF	GO:0001540	amyloid-beta binding	10/560	84/18367	0.000233288	0.00599591	0.00476985	NGFR/CRYAB/ITM2A/ITM2C/PRNP/CD36/CD74/C1QA/RAMP3/APOE	10
MF	GO:0005518	collagen binding	9/560	69/18367	0.000237361	0.00599591	0.00476985	TNXB/C1QTNF1/PCOLCE2/VWF/COL14A1/SPARCL1/MRC2/PODN/COL6A2	9
MF	GO:0097493	structural molecule activity conferring elasticity	4/560	11/18367	0.000237834	0.00599591	0.00476985	FBLN5/FBLN2/ELN/EMILIN1	4
MF	GO:0017147	Wnt-protein binding	6/560	30/18367	0.000248754	0.00611042	0.00486094	SFRP1/TRABD2B/FZD7/WIF1/FRZB/SFRP2	6
MF	GO:0005044	scavenger receptor activity	7/560	47/18367	0.000514716	0.0122989	0.009784	CFI/ENPP2/SCARA5/CD36/TMPRSS3/LOXL4/SCARA3	7
MF	GO:0008131	primary amine oxidase activity	3/560	6/18367	0.000526363	0.0122989	0.009784	AOC3/MAOB/MAOA	3
MF	GO:0038024	cargo receptor activity	9/560	77/18367	0.000544837	0.0122993	0.00978428	CFI/ENPP2/SCARA5/FOLR1/CD36/TMPRSS3/LOXL4/SCARA3/FOLR2	9
MF	GO:0019865	immunoglobulin binding	5/560	23/18367	0.000552055	0.0122993	0.00978428	FCER1A/JCHAIN/VWF/LGALS3/PIP	5
MF	GO:0004896	cytokine receptor activity	10/560	97/18367	0.00074703	0.0162649	0.012939	IL27RA/F3/IL4R/CSF2RB/IL7R/CCR7/IL2RG/CRLF1/CD74/PRLR	10
MF	GO:0004867	serine-type endopeptidase inhibitor activity	10/560	98/18367	0.000809716	0.0170966	0.0136006	ITIH5/SERPINF2/SERPINB5/PAPLN/A2M/SERPING1/SLPI/PI3/WFDC2/TFPI2	10
MF	GO:0002020	protease binding	12/560	135/18367	0.000882368	0.0170966	0.0136006	SERPINF2/A2M/F3/VWF/KIT/TIMP4/PRNP/LCN2/TNFAIP3/NTRK2/SELL/PYCARD	12
MF	GO:0004913	interleukin-4 receptor activity	2/560	2/18367	0.000927998	0.0170966	0.0136006	IL4R/IL2RG	2
MF	GO:0004917	interleukin-7 receptor activity	2/560	2/18367	0.000927998	0.0170966	0.0136006	IL7R/IL2RG	2
MF	GO:0005006	epidermal growth factor-activated receptor activity	2/560	2/18367	0.000927998	0.0170966	0.0136006	EGFR/EFEMP1	2
MF	GO:0031729	CCR4 chemokine receptor binding	2/560	2/18367	0.000927998	0.0170966	0.0136006	CCL17/CCL5	2
MF	GO:0031732	CCR7 chemokine receptor binding	2/560	2/18367	0.000927998	0.0170966	0.0136006	CCL21/CCL19	2
MF	GO:0061714	folic acid receptor activity	2/560	2/18367	0.000927998	0.0170966	0.0136006	FOLR1/FOLR2	2
MF	GO:0005504	fatty acid binding	6/560	39/18367	0.00108364	0.0195873	0.015582	FABP4/PTGDS/GSTP1/GSTA1/S100A9/S100A8	6
MF	GO:0016641	oxidoreductase activity, acting on the CH-NH2 group of donors, oxygen as acceptor	4/560	16/18367	0.00116165	0.0206086	0.0163945	AOC3/LOXL4/MAOB/MAOA	4
MF	GO:0038036	sphingosine-1-phosphate receptor activity	3/560	8/18367	0.00140787	0.0243264	0.019352	S1PR1/S1PR4/SPHK1	3
MF	GO:0001968	fibronectin binding	5/560	28/18367	0.001422	0.0243264	0.019352	IGFBP6/CCN2/FBLN1/CCDC80/SFRP2	5
MF	GO:0005520	insulin-like growth factor binding	5/560	29/18367	0.00167571	0.0281636	0.0224046	ITGB4/CCN1/IGFBP6/CCN3/CCN2	5
MF	GO:0016504	peptidase activator activity	6/560	43/18367	0.00182709	0.0301785	0.0240075	VSIR/CAV1/PCOLCE2/FBLN1/PYCARD/SFRP2	6
MF	GO:0098641	cadherin binding involved in cell-cell adhesion	4/560	18/18367	0.00186081	0.0302146	0.0240362	TRIM29/ANXA1/CDC42EP1/PDLIM1	4
MF	GO:0004864	protein phosphatase inhibitor activity	6/560	46/18367	0.00259941	0.0408288	0.03248	PPP1R14A/PTN/LGALS3/PPP1R1A/PPP1R14C/PPP1R1B	6
MF	GO:0004768	stearoyl-CoA 9-desaturase activity	2/560	3/18367	0.0027276	0.0408288	0.03248	SCD/FADS2	2
MF	GO:0031708	endothelin B receptor binding	2/560	3/18367	0.0027276	0.0408288	0.03248	EDN1/EDN3	2
MF	GO:0031735	CCR10 chemokine receptor binding	2/560	3/18367	0.0027276	0.0408288	0.03248	CCL19/CXCL13	2
MF	GO:0097621	monoamine oxidase activity	2/560	3/18367	0.0027276	0.0408288	0.03248	MAOB/MAOA	2
MF	GO:0016638	oxidoreductase activity, acting on the CH-NH2 group of donors	4/560	20/18367	0.00280736	0.0413762	0.0329155	AOC3/LOXL4/MAOB/MAOA	4
MF	GO:0001228	DNA-binding transcription activator activity, RNA polymerase II-specific	25/560	450/18367	0.00301511	0.0433245	0.0344653	TP63/MEOX1/SOX17/JUNB/CEBPD/NDN/EGR1/MEOX2/EGR2/SOX18/HOXA5/JUN/KLF4/FOSB/ETS1/FOS/NR4A1/FOXC1/KLF5/ATF3/EGR3/CEBPB/NFIB/FOXA1/ESR1	25
MF	GO:0019956	chemokine binding	5/560	33/18367	0.00303	0.0433245	0.0344653	ACKR1/A2M/FGF2/ZFP36/CCR7	5
MF	GO:0140416	transcription regulator inhibitor activity	4/560	21/18367	0.0033853	0.0476929	0.0379405	ID1/ID4/ID3/MDFI	4
MF	GO:0001216	DNA-binding transcription activator activity	25/560	456/18367	0.00357838	0.0491857	0.0391281	TP63/MEOX1/SOX17/JUNB/CEBPD/NDN/EGR1/MEOX2/EGR2/SOX18/HOXA5/JUN/KLF4/FOSB/ETS1/FOS/NR4A1/FOXC1/KLF5/ATF3/EGR3/CEBPB/NFIB/FOXA1/ESR1	25
MF	GO:0019212	phosphatase inhibitor activity	6/560	49/18367	0.00359395	0.0491857	0.0391281	PPP1R14A/PTN/LGALS3/PPP1R1A/PPP1R14C/PPP1R1B	6
