# Supplementary material for: Bioinformatic analysis and experimental validation of six cuproptosis-associated genes as a prognostic signature of breast cancer
Source: PeerJ journal article supplement (doi:10.7717/peerj.17419), 2024-06-18
Supplement: Supplementary_Table_6.xlsx [file Supplementary_Table_6.xlsx]

## Sheet: Sheet1
Supplementary Table 6 The GSEA result between high- and low-Cusig score groups based on GO
High-Cusig score group
NAME	SIZE	ES	NES	NOM p-val	FDR q-val	FWER p-val	RANK AT MAX	LEADING EDGE
GO_CHROMOSOME_CENTROMERIC_REGION	196	0.555241	3.05878	0	0	0	3143	tags=53%, list=16%, signal=62%
GO_KINETOCHORE	137	0.580593	2.96658	0	0	0	2642	tags=53%, list=14%, signal=61%
GO_CENTROMERE_COMPLEX_ASSEMBLY	53	0.670136	2.91992	0	0	0	3350	tags=66%, list=18%, signal=80%
GO_CONDENSED_CHROMOSOME_CENTROMERIC_REGION	122	0.565938	2.91407	0	0	0	2821	tags=55%, list=15%, signal=64%
GO_DNA_DEPENDENT_DNA_REPLICATION	151	0.581452	2.89167	0	0	0	2940	tags=49%, list=15%, signal=57%
GO_CHROMATIN_REMODELING_AT_CENTROMERE	44	0.692602	2.84506	0	0	0	3350	tags=68%, list=18%, signal=83%
GO_DNA_REPLICATION	272	0.481534	2.80051	0	0	0	3153	tags=43%, list=17%, signal=51%
GO_DNA_GEOMETRIC_CHANGE	113	0.545587	2.78988	0	0	0	2730	tags=41%, list=14%, signal=47%
GO_DNA_DEPENDENT_ATPASE_ACTIVITY	106	0.59279	2.78913	0	0	0	2699	tags=48%, list=14%, signal=56%
GO_SISTER_CHROMATID_SEGREGATION	188	0.540033	2.78013	0	0	0	3265	tags=49%, list=17%, signal=59%
GO_DNA_REPLICATION_INDEPENDENT_NUCLEOSOME_ORGANIZATION	51	0.649507	2.77996	0	0	0	3350	tags=65%, list=18%, signal=78%
GO_SPINDLE_MICROTUBULE	65	0.59877	2.77296	0	0	0	3182	tags=55%, list=17%, signal=66%
GO_SISTER_CHROMATID_COHESION	57	0.622544	2.7551	0	0	0	3570	tags=56%, list=19%, signal=69%
GO_CONDENSED_CHROMOSOME	219	0.514498	2.74703	0	0	0	2821	tags=45%, list=15%, signal=52%
GO_MITOTIC_SISTER_CHROMATID_SEGREGATION	159	0.545603	2.74691	0	0	0	2821	tags=48%, list=15%, signal=56%
GO_DNA_REPLICATION_INITIATION	39	0.665138	2.71806	0	0	0	2592	tags=62%, list=14%, signal=71%
GO_DNA_HELICASE_ACTIVITY	76	0.56294	2.71673	0	0	0	3704	tags=50%, list=19%, signal=62%
GO_REGULATION_OF_CHROMOSOME_SEGREGATION	103	0.56441	2.69255	0	0	0	3537	tags=52%, list=19%, signal=64%
GO_CHROMOSOME_SEPARATION	92	0.550381	2.68857	0	0	0	2821	tags=46%, list=15%, signal=53%
GO_DNA_DEPENDENT_DNA_REPLICATION_MAINTENANCE_OF_FIDELITY	44	0.62837	2.67739	0	0	0	2940	tags=57%, list=15%, signal=67%
GO_DNA_DOUBLE_STRAND_BREAK_PROCESSING	25	0.731976	2.67581	0	0	0	2084	tags=52%, list=11%, signal=58%
GO_MITOTIC_SPINDLE_ASSEMBLY	64	0.588486	2.67201	0	0	0	3030	tags=53%, list=16%, signal=63%
GO_MICROTUBULE_CYTOSKELETON_ORGANIZATION_INVOLVED_IN_MITOSIS	142	0.485426	2.65328	0	0	0	3537	tags=49%, list=19%, signal=59%
GO_CELL_CYCLE_DNA_REPLICATION	65	0.597394	2.65146	0	0	0	3468	tags=55%, list=18%, signal=67%
GO_ATTACHMENT_OF_SPINDLE_MICROTUBULES_TO_KINETOCHORE	34	0.694803	2.64397	0	0	0	2821	tags=62%, list=15%, signal=72%
GO_HOMOLOGOUS_RECOMBINATION	56	0.597154	2.63357	0	0	0	2654	tags=48%, list=14%, signal=56%
GO_MEIOSIS_I_CELL_CYCLE_PROCESS	123	0.520708	2.62674	0	0	0	2654	tags=39%, list=14%, signal=45%
GO_DNA_PACKAGING_COMPLEX	96	0.548315	2.62625	0	0	0	4585	tags=54%, list=24%, signal=71%
GO_REGULATION_OF_CENTROSOME_CYCLE	59	0.591452	2.61884	0	0	0	3265	tags=49%, list=17%, signal=59%
GO_DNA_STRAND_ELONGATION	26	0.716596	2.61318	0	0	0	4372	tags=77%, list=23%, signal=100%
GO_REPLICATION_FORK_PROCESSING	35	0.650824	2.60551	0	0	0	2940	tags=57%, list=15%, signal=67%
GO_CHROMOSOME_CONDENSATION	34	0.66356	2.60109	0	0	0	1606	tags=41%, list=8%, signal=45%
GO_REGULATION_OF_SISTER_CHROMATID_SEGREGATION	82	0.543225	2.60095	0	0	0	3537	tags=52%, list=19%, signal=64%
GO_REGULATION_OF_DNA_DEPENDENT_DNA_REPLICATION	52	0.586744	2.58863	0	0	0	3065	tags=52%, list=16%, signal=62%
GO_PROTEIN_LOCALIZATION_TO_CHROMOSOME	84	0.526737	2.58411	0	0	0	3763	tags=54%, list=20%, signal=66%
GO_MEIOTIC_CHROMOSOME_SEGREGATION	92	0.537838	2.58388	0	0	0	2654	tags=39%, list=14%, signal=45%
GO_REGULATION_OF_CHROMOSOME_SEPARATION	64	0.553289	2.58286	0	0	0	2821	tags=48%, list=15%, signal=57%
GO_POSITIVE_REGULATION_OF_CHROMOSOME_SEGREGATION	33	0.655364	2.58101	0	0	0	4027	tags=58%, list=21%, signal=73%
GO_RECOMBINATIONAL_REPAIR	140	0.48576	2.57951	0	0	0	3470	tags=46%, list=18%, signal=55%
GO_NUCLEOSOME_ASSEMBLY	124	0.497915	2.57704	0	0	0	4191	tags=52%, list=22%, signal=66%
GO_FEMALE_MEIOTIC_NUCLEAR_DIVISION	31	0.644709	2.57245	0	0	0	3116	tags=52%, list=16%, signal=62%
GO_ATP_DEPENDENT_CHROMATIN_REMODELING	89	0.524561	2.57104	0	0	0	3704	tags=52%, list=19%, signal=64%
GO_REPLICATION_FORK	70	0.563205	2.5559	0	0	0	3121	tags=51%, list=16%, signal=61%
GO_HISTONE_EXCHANGE	58	0.570591	2.55102	0	0	0	3350	tags=53%, list=18%, signal=65%
GO_NCRNA_EXPORT_FROM_NUCLEUS	38	0.636287	2.55083	0	0	0	5405	tags=71%, list=28%, signal=99%
GO_MITOTIC_SPINDLE_ORGANIZATION	116	0.502041	2.54384	0	0	0	3853	tags=52%, list=20%, signal=64%
GO_DNA_REPLICATION_ORIGIN_BINDING	23	0.719632	2.54247	0	0	0	3931	tags=78%, list=21%, signal=98%
GO_MEIOTIC_CELL_CYCLE	252	0.45929	2.5254	0	0	0	2654	tags=36%, list=14%, signal=41%
GO_RDNA_HETEROCHROMATIN_ASSEMBLY	35	0.632262	2.51992	0	0	0	4059	tags=54%, list=21%, signal=69%
GO_HELICASE_ACTIVITY	158	0.502166	2.50868	0	0	0	3718	tags=44%, list=20%, signal=54%
GO_MEIOTIC_CELL_CYCLE_PROCESS	192	0.470132	2.50498	0	0	0	2654	tags=36%, list=14%, signal=42%
GO_SPINDLE_ORGANIZATION	180	0.42988	2.48995	0	0	0	3624	tags=44%, list=19%, signal=54%
GO_SPINDLE_ASSEMBLY	113	0.45086	2.48925	0	0	0	3336	tags=45%, list=18%, signal=54%
GO_PROTEIN_DNA_COMPLEX_SUBUNIT_ORGANIZATION	259	0.436643	2.47944	0	0	0	3518	tags=39%, list=18%, signal=48%
GO_NUCLEAR_REPLICATION_FORK	40	0.604957	2.47835	0	0	0	3468	tags=58%, list=18%, signal=70%
GO_CHROMOSOME_ORGANIZATION_INVOLVED_IN_MEIOTIC_CELL_CYCLE	70	0.529194	2.46545	0	0	0	2382	tags=39%, list=13%, signal=44%
GO_METAPHASE_ANAPHASE_TRANSITION_OF_CELL_CYCLE	59	0.550739	2.46175	0	0	0	2821	tags=49%, list=15%, signal=58%
GO_TRNA_TRANSPORT	37	0.624268	2.45638	0	0	0	5405	tags=70%, list=28%, signal=98%
GO_MITOTIC_SISTER_CHROMATID_COHESION	26	0.667936	2.4351	0	9.92298e-05	0.003	1615	tags=50%, list=8%, signal=55%
GO_DNA_REPLICATION_DEPENDENT_NUCLEOSOME_ORGANIZATION	29	0.636279	2.42877	0	9.77917e-05	0.003	4011	tags=59%, list=21%, signal=74%
GO_DNA_PACKAGING	217	0.456741	2.42283	0	9.5037e-05	0.003	3420	tags=39%, list=18%, signal=47%
GO_CONDENSED_NUCLEAR_CHROMOSOME	103	0.485847	2.41208	0	9.24333e-05	0.003	2821	tags=42%, list=15%, signal=49%
GO_CENTROSOME_DUPLICATION	68	0.512424	2.40825	0	9.11842e-05	0.003	3265	tags=46%, list=17%, signal=55%
GO_PROTEIN_LOCALIZATION_TO_CHROMOSOME_CENTROMERIC_REGION	22	0.669931	2.35833	0	0.000321018	0.011	3075	tags=68%, list=16%, signal=81%
GO_TELOMERE_MAINTENANCE_VIA_SEMI_CONSERVATIVE_REPLICATION	27	0.618991	2.35643	0	0.000316902	0.011	4707	tags=70%, list=25%, signal=93%
GO_NON_RECOMBINATIONAL_REPAIR	102	0.46156	2.32712	0	0.000437479	0.016	3350	tags=38%, list=18%, signal=46%
GO_REGULATION_OF_CENTROSOME_DUPLICATION	44	0.546237	2.32676	0	0.000432208	0.016	3560	tags=50%, list=19%, signal=61%
GO_NUCLEOSOME_ORGANIZATION	162	0.464455	2.32594	0	0.000427063	0.016	4506	tags=51%, list=24%, signal=67%
GO_CONDENSED_NUCLEAR_CHROMOSOME_CENTROMERIC_REGION	32	0.591732	2.30967	0	0.000549185	0.021	3067	tags=66%, list=16%, signal=78%
GO_POSITIVE_REGULATION_OF_MITOTIC_SISTER_CHROMATID_SEGREGATION	22	0.639209	2.29557	0	0.000750748	0.029	5881	tags=82%, list=31%, signal=118%
GO_CENTRIOLE_ASSEMBLY	40	0.563943	2.29431	0	0.000759805	0.03	4133	tags=52%, list=22%, signal=67%
GO_RNA_POLYMERASE_COMPLEX	101	0.468124	2.29418	0	0.000751362	0.03	3172	tags=38%, list=17%, signal=45%
GO_MEIOTIC_CHROMOSOME_SEPARATION	25	0.624886	2.29402	0	0.000743105	0.03	2284	tags=44%, list=12%, signal=50%
GO_REGULATION_OF_CENTRIOLE_REPLICATION	23	0.628165	2.29115	0	0.000802158	0.033	3560	tags=52%, list=19%, signal=64%
GO_REGULATION_OF_CELL_CYCLE_G2_M_PHASE_TRANSITION	213	0.39489	2.28627	0	0.000912656	0.037	3182	tags=35%, list=17%, signal=42%
GO_TRANSCRIPTION_ELONGATION_FACTOR_COMPLEX	52	0.527846	2.28591	0	0.000927339	0.038	4677	tags=58%, list=25%, signal=76%
GO_PROTEIN_LOCALIZATION_TO_MICROTUBULE_ORGANIZING_CENTER	33	0.586559	2.28488	0	0.000917679	0.038	2482	tags=42%, list=13%, signal=49%
GO_MITOTIC_SPINDLE	133	0.484475	2.28398	0	0.000931589	0.038	2821	tags=38%, list=15%, signal=44%
GO_TELOMERE_ORGANIZATION	167	0.454149	2.28064	0	0.00100469	0.042	3771	tags=46%, list=20%, signal=56%
GO_POSITIVE_REGULATION_OF_CELL_CYCLE_G2_M_PHASE_TRANSITION	30	0.586747	2.26786	0	0.00110139	0.047	867	tags=33%, list=5%, signal=35%
GO_KINETOCHORE_ORGANIZATION	22	0.647682	2.25127	0	0.00132349	0.057	2284	tags=59%, list=12%, signal=67%
GO_MICROTUBULE_ORGANIZING_CENTER_ORGANIZATION	136	0.461355	2.24964	0	0.00131076	0.057	2424	tags=38%, list=13%, signal=43%
GO_REGULATION_OF_SISTER_CHROMATID_COHESION	22	0.642324	2.24729	0	0.00136342	0.06	4027	tags=68%, list=21%, signal=86%
GO_NUCLEAR_CHROMOSOME_TELOMERIC_REGION	120	0.443487	2.2438	0	0.00139452	0.062	4309	tags=47%, list=23%, signal=60%
GO_PROTEIN_DNA_COMPLEX	183	0.422368	2.24292	0	0.0014035	0.063	4372	tags=44%, list=23%, signal=56%
GO_MITOTIC_RECOMBINATION	22	0.644019	2.24202	0	0.00139051	0.063	2136	tags=55%, list=11%, signal=61%
GO_NEGATIVE_REGULATION_OF_DNA_REPLICATION	34	0.586792	2.24112	0	0.00143929	0.065	3306	tags=53%, list=17%, signal=64%
GO_NUCLEAR_CHROMOSOME_SEGREGATION	264	0.506474	2.24012	0	0.00146713	0.066	2821	tags=42%, list=15%, signal=49%
GO_METAPHASE_PLATE_CONGRESSION	61	0.47528	2.22118	0	0.00168497	0.078	3265	tags=52%, list=17%, signal=63%
GO_CHROMOSOME_TELOMERIC_REGION	159	0.405977	2.20905	0	0.00193232	0.088	3586	tags=39%, list=19%, signal=48%
GO_INTERSTRAND_CROSS_LINK_REPAIR	55	0.523821	2.20465	0	0.00199486	0.092	4256	tags=56%, list=22%, signal=72%
GO_CILIARY_BASAL_BODY_PLASMA_MEMBRANE_DOCKING	95	0.447398	2.19412	0	0.00215904	0.099	3182	tags=36%, list=17%, signal=43%
GO_CHROMATIN_ASSEMBLY_OR_DISASSEMBLY	198	0.407946	2.19061	0	0.00218104	0.102	3420	tags=38%, list=18%, signal=46%
GO_TELOMERE_CAPPING	53	0.513354	2.1801	0	0.00251037	0.118	3771	tags=47%, list=20%, signal=59%
GO_DNA_RECOMBINATION	283	0.357788	2.16901	0	0.00286118	0.137	2801	tags=33%, list=15%, signal=38%
GO_AMINO_ACID_ACTIVATION	49	0.491237	2.16718	0	0.00293229	0.14	4688	tags=55%, list=25%, signal=73%
GO_RNA_EXPORT_FROM_NUCLEUS	142	0.415199	2.15994	0	0.00308771	0.15	4411	tags=41%, list=23%, signal=53%
GO_METHYLATED_HISTONE_BINDING	69	0.461589	2.15981	0	0.00306301	0.15	3704	tags=42%, list=19%, signal=52%
GO_NEGATIVE_REGULATION_OF_CHROMOSOME_SEGREGATION	44	0.507732	2.15268	0	0.00314029	0.157	2086	tags=45%, list=11%, signal=51%
GO_RIBONUCLEOPROTEIN_COMPLEX_BINDING	132	0.410479	2.14533	0	0.00339204	0.172	3858	tags=44%, list=20%, signal=55%
GO_MITOTIC_SPINDLE_POLE	30	0.547117	2.14355	0	0.00345241	0.177	2805	tags=43%, list=15%, signal=51%
GO_SPINDLE_POLE	163	0.427483	2.14329	0	0.00342606	0.177	2059	tags=31%, list=11%, signal=35%
GO_CATALYTIC_ACTIVITY_ACTING_ON_DNA	200	0.412749	2.13933	0	0.00359298	0.188	3286	tags=38%, list=17%, signal=45%
GO_REGULATION_OF_SPINDLE_ASSEMBLY	24	0.599153	2.13502	0	0.00360756	0.191	5199	tags=63%, list=27%, signal=86%
GO_RNA_POLYMERASE_II_HOLOENZYME	76	0.458602	2.1321	0	0.00374664	0.199	2852	tags=34%, list=15%, signal=40%
GO_STRUCTURAL_CONSTITUENT_OF_NUCLEAR_PORE	27	0.578495	2.12641	0	0.00392129	0.21	5405	tags=63%, list=28%, signal=88%
GO_HISTONE_UBIQUITINATION	48	0.512199	2.1245	0	0.00396311	0.216	3945	tags=50%, list=21%, signal=63%
GO_HISTONE_MRNA_METABOLIC_PROCESS	25	0.57887	2.12079	0	0.00409761	0.224	3608	tags=44%, list=19%, signal=54%
GO_MITOTIC_CYTOKINESIS	72	0.458574	2.11256	0	0.00429508	0.238	3644	tags=46%, list=19%, signal=56%
GO_CHROMOSOME_LOCALIZATION	79	0.45181	2.10029	0	0.00469603	0.26	3265	tags=46%, list=17%, signal=55%
GO_OLIGOSACCHARIDE_LIPID_INTERMEDIATE_BIOSYNTHETIC_PROCESS	21	0.594754	2.09952	0	0.00469508	0.262	5711	tags=81%, list=30%, signal=115%
GO_NEGATIVE_REGULATION_OF_NUCLEAR_DIVISION	59	0.450419	2.09841	0	0.00474037	0.266	2133	tags=42%, list=11%, signal=48%
GO_MITOTIC_G2_M_TRANSITION_CHECKPOINT	31	0.52882	2.09139	0	0.00502783	0.284	2131	tags=45%, list=11%, signal=51%
GO_CENTRIOLE	139	0.387196	2.0867	0	0.00528813	0.301	4083	tags=46%, list=21%, signal=58%
GO_RNA_POLYADENYLATION	48	0.495085	2.08439	0	0.00533925	0.308	3915	tags=50%, list=21%, signal=63%
GO_INTRA_GOLGI_VESICLE_MEDIATED_TRANSPORT	34	0.5092	2.08253	0	0.00544669	0.317	4908	tags=62%, list=26%, signal=83%
GO_PROTEASOME_ACCESSORY_COMPLEX	24	0.574249	2.08166	0	0.00540597	0.318	4655	tags=58%, list=24%, signal=77%
GO_REGULATION_OF_CYTOKINESIS	89	0.43038	2.07691	0	0.00569741	0.335	2463	tags=35%, list=13%, signal=40%
GO_PEPTIDE_N_ACETYLTRANSFERASE_ACTIVITY	65	0.458904	2.07218	0	0.00588513	0.346	3597	tags=35%, list=19%, signal=43%
GO_NEGATIVE_REGULATION_OF_CHROMOSOME_ORGANIZATION	134	0.412625	2.07079	0	0.00597551	0.351	3586	tags=41%, list=19%, signal=50%
GO_MITOTIC_CELL_CYCLE_CHECKPOINT	165	0.36203	2.06213	0	0.00647276	0.373	3481	tags=41%, list=18%, signal=50%
GO_NEGATIVE_REGULATION_OF_METAPHASE_ANAPHASE_TRANSITION_OF_CELL_CYCLE	37	0.511306	2.05095	0	0.00717808	0.409	2086	tags=46%, list=11%, signal=51%
GO_PROTEIN_MONOUBIQUITINATION	69	0.465193	2.04833	0	0.00726979	0.418	4412	tags=51%, list=23%, signal=66%
GO_MITOTIC_METAPHASE_PLATE_CONGRESSION	47	0.47745	2.04539	0	0.00751365	0.431	3265	tags=51%, list=17%, signal=61%
GO_CARBOXY_TERMINAL_DOMAIN_PROTEIN_KINASE_COMPLEX	20	0.605603	2.02572	0	0.00848874	0.483	2395	tags=40%, list=13%, signal=46%
GO_CYTOKINESIS	171	0.352985	2.02029	0	0.00867861	0.493	1072	tags=21%, list=6%, signal=22%
GO_POSITIVE_REGULATION_OF_DNA_TEMPLATED_TRANSCRIPTION_ELONGATION	27	0.547775	2.01266	0	0.00924661	0.518	3750	tags=52%, list=20%, signal=64%
GO_POSTREPLICATION_REPAIR	52	0.482173	2.01237	0	0.00922052	0.518	4417	tags=52%, list=23%, signal=67%
GO_RNA_POLYMERASE_CORE_ENZYME_BINDING	45	0.486594	2.00218	0	0.00994181	0.544	3945	tags=51%, list=21%, signal=64%
GO_ENDOPEPTIDASE_COMPLEX	69	0.422344	2.00094	0	0.00993706	0.549	3096	tags=36%, list=16%, signal=43%
GO_DNA_INTEGRITY_CHECKPOINT	159	0.381647	1.99854	0	0.0101124	0.559	2659	tags=35%, list=14%, signal=41%
GO_TELOMERE_MAINTENANCE_VIA_TELOMERE_LENGTHENING	80	0.421944	1.99821	0	0.0100589	0.559	3771	tags=43%, list=20%, signal=53%
GO_PROTEIN_DEMANNOSYLATION	20	0.579907	1.99641	0	0.0101503	0.567	3021	tags=45%, list=16%, signal=53%
GO_UBIQUITIN_LIKE_PROTEIN_CONJUGATING_ENZYME_ACTIVITY	43	0.471105	1.98735	0	0.0110628	0.604	4006	tags=42%, list=21%, signal=53%
GO_NUCLEAR_PORE	84	0.415811	1.98536	0	0.011179	0.61	5571	tags=51%, list=29%, signal=72%
GO_N_ACETYLTRANSFERASE_ACTIVITY	84	0.427228	1.9834	0	0.0113197	0.618	4080	tags=37%, list=21%, signal=47%
GO_VESICLE_CARGO_LOADING	26	0.538812	1.97749	0	0.0116895	0.637	2451	tags=35%, list=13%, signal=40%
GO_REGULATION_OF_TELOMERE_MAINTENANCE_VIA_TELOMERE_LENGTHENING	61	0.441412	1.97289	0	0.0121189	0.649	3771	tags=43%, list=20%, signal=53%
GO_TRANSFERASE_COMPLEX_TRANSFERRING_PHOSPHORUS_CONTAINING_GROUPS	245	0.33815	1.97286	0	0.012058	0.649	2877	tags=31%, list=15%, signal=36%
GO_VESICLE_COAT	56	0.443124	1.97017	0	0.0123061	0.658	4040	tags=45%, list=21%, signal=56%
GO_REGULATION_OF_MRNA_3_END_PROCESSING	28	0.540877	1.967	0	0.0123986	0.665	3372	tags=54%, list=18%, signal=65%
GO_ESTABLISHMENT_OF_MITOTIC_SPINDLE_LOCALIZATION	35	0.507311	1.96687	0	0.0123595	0.666	2305	tags=43%, list=12%, signal=49%
GO_SPINDLE_LOCALIZATION	50	0.461508	1.96198	0	0.0127558	0.678	2305	tags=34%, list=12%, signal=39%
GO_METHYLTRANSFERASE_COMPLEX	105	0.406044	1.95157	0	0.0137805	0.709	3803	tags=39%, list=20%, signal=49%
GO_LYSINE_ACETYLATED_HISTONE_BINDING	22	0.566759	1.95117	0	0.0137686	0.71	3451	tags=50%, list=18%, signal=61%
GO_HOMOLOGOUS_CHROMOSOME_SEGREGATION	61	0.440949	1.94588	0	0.0141048	0.729	2654	tags=33%, list=14%, signal=38%
GO_NUCLEOTIDE_EXCISION_REPAIR	109	0.401281	1.94551	0	0.0140926	0.732	2877	tags=32%, list=15%, signal=38%
GO_REGULATION_OF_CELLULAR_RESPONSE_TO_HEAT	79	0.415745	1.94382	0	0.0142608	0.74	3468	tags=42%, list=18%, signal=51%
GO_CHROMATIN_REMODELING	211	0.373764	1.94294	0	0.0142669	0.742	3546	tags=39%, list=19%, signal=47%
GO_TRANSCRIPTION_ELONGATION_FROM_RNA_POLYMERASE_II_PROMOTER	82	0.422035	1.94257	0	0.0142429	0.743	3172	tags=34%, list=17%, signal=41%
GO_G2_DNA_DAMAGE_CHECKPOINT	35	0.489566	1.93962	0	0.0144493	0.751	2131	tags=43%, list=11%, signal=48%
GO_PEPTIDE_LYSINE_N_ACETYLTRANSFERASE_ACTIVITY	57	0.452308	1.93946	0	0.0144036	0.752	4080	tags=37%, list=21%, signal=47%
GO_REGULATION_OF_DNA_REPLICATION	112	0.413908	1.93914	0	0.0144107	0.755	3137	tags=42%, list=16%, signal=50%
GO_MRNA_3_END_PROCESSING	101	0.396916	1.93857	0	0.0144276	0.758	3915	tags=40%, list=21%, signal=50%
GO_NUCLEOCYTOPLASMIC_CARRIER_ACTIVITY	31	0.51188	1.93852	0	0.0143623	0.758	4304	tags=52%, list=23%, signal=67%
GO_CELL_CYCLE_G2_M_PHASE_TRANSITION	268	0.351312	1.93134	0	0.0149894	0.777	3197	tags=35%, list=17%, signal=41%
GO_HISTONE_METHYLTRANSFERASE_COMPLEX	77	0.412758	1.92899	0	0.0152184	0.782	3547	tags=39%, list=19%, signal=48%
GO_CELL_CYCLE_CHECKPOINT	217	0.373474	1.92697	0	0.0152293	0.788	3620	tags=41%, list=19%, signal=51%
GO_DNA_TEMPLATED_TRANSCRIPTION_ELONGATION	108	0.396597	1.92665	0	0.0151926	0.789	3172	tags=32%, list=17%, signal=39%
GO_REGULATION_OF_TELOMERE_MAINTENANCE	80	0.402135	1.9182	0	0.0160574	0.809	3874	tags=44%, list=20%, signal=55%
GO_MODIFICATION_DEPENDENT_PROTEIN_BINDING	153	0.338435	1.90952	0	0.0169894	0.829	3588	tags=39%, list=19%, signal=48%
GO_NEGATIVE_REGULATION_OF_GENE_EXPRESSION_EPIGENETIC	106	0.380607	1.90612	0	0.0169738	0.839	4139	tags=40%, list=22%, signal=50%
GO_REGULATION_OF_TRANSCRIPTION_INVOLVED_IN_G1_S_TRANSITION_OF_MITOTIC_CELL_CYCLE	34	0.480137	1.90275	0	0.0172708	0.846	2979	tags=41%, list=16%, signal=49%
GO_PROTEIN_LOCALIZATION_TO_CYTOSKELETON	57	0.418092	1.89869	0	0.0177099	0.857	2694	tags=37%, list=14%, signal=43%
GO_RNA_HELICASE_ACTIVITY	75	0.413635	1.89538	0	0.018168	0.865	4577	tags=41%, list=24%, signal=54%
GO_SMALL_SUBUNIT_PROCESSOME	38	0.451543	1.88669	0	0.0192716	0.889	4388	tags=39%, list=23%, signal=51%
GO_INTRAMOLECULAR_TRANSFERASE_ACTIVITY	25	0.524215	1.88549	0	0.0193903	0.894	3006	tags=44%, list=16%, signal=52%
GO_TERMINATION_OF_RNA_POLYMERASE_II_TRANSCRIPTION	35	0.476635	1.88502	0	0.0193399	0.894	5061	tags=57%, list=27%, signal=78%
GO_TRANSCRIPTION_FACTOR_TFIID_COMPLEX	33	0.484184	1.88369	0	0.0194707	0.895	2520	tags=33%, list=13%, signal=38%
GO_HISTONE_BINDING	234	0.337117	1.88312	0	0.0195013	0.896	3728	tags=37%, list=20%, signal=45%
GO_PROTEIN_LOCALIZATION_TO_CHROMOSOME_TELOMERIC_REGION	30	0.500943	1.88286	0	0.0194599	0.897	3763	tags=50%, list=20%, signal=62%
GO_G0_TO_G1_TRANSITION	43	0.459956	1.88058	0	0.0197157	0.902	3547	tags=53%, list=19%, signal=66%
GO_TRANSLATION_INITIATION_FACTOR_ACTIVITY	51	0.435778	1.87534	0	0.0203173	0.91	4045	tags=39%, list=21%, signal=50%
GO_SINGLE_STRANDED_DNA_BINDING	112	0.384244	1.87298	0	0.0206859	0.911	3512	tags=38%, list=18%, signal=46%
GO_NEGATIVE_REGULATION_OF_TELOMERE_MAINTENANCE	36	0.479757	1.86928	0	0.0210016	0.915	3586	tags=39%, list=19%, signal=48%
GO_HISTONE_MONOUBIQUITINATION	29	0.487576	1.86915	0	0.0209401	0.915	4340	tags=59%, list=23%, signal=76%
GO_MICROTUBULE_MOTOR_ACTIVITY	76	0.397723	1.86494	0	0.0217016	0.928	3394	tags=46%, list=18%, signal=56%
GO_RETROGRADE_VESICLE_MEDIATED_TRANSPORT_GOLGI_TO_ENDOPLASMIC_RETICULUM	87	0.396231	1.85724	0	0.022534	0.936	3188	tags=36%, list=17%, signal=43%
GO_NUCLEAR_NUCLEOSOME	33	0.482872	1.85118	0	0.0230862	0.945	4263	tags=42%, list=22%, signal=55%
GO_CHROMATIN_ORGANIZATION_INVOLVED_IN_REGULATION_OF_TRANSCRIPTION	135	0.36577	1.84953	0	0.0232792	0.947	4139	tags=37%, list=22%, signal=47%
GO_REGULATION_OF_DOUBLE_STRAND_BREAK_REPAIR	84	0.384961	1.84952	0	0.0231954	0.947	2463	tags=32%, list=13%, signal=37%
GO_LIGASE_ACTIVITY_FORMING_CARBON_OXYGEN_BONDS	41	0.447373	1.8462	0	0.0232925	0.948	4561	tags=49%, list=24%, signal=64%
GO_POSITIVE_REGULATION_OF_CYTOKINESIS	39	0.442081	1.84405	0	0.0235878	0.951	809	tags=23%, list=4%, signal=24%
GO_DNA_SYNTHESIS_INVOLVED_IN_DNA_REPAIR	52	0.434209	1.84275	0	0.0237755	0.952	4417	tags=46%, list=23%, signal=60%
GO_NEGATIVE_REGULATION_OF_DNA_REPAIR	35	0.460281	1.84201	0	0.0237725	0.952	3252	tags=40%, list=17%, signal=48%
GO_MRNA_EXPORT_FROM_NUCLEUS	112	0.363559	1.8408	0	0.0239037	0.953	4526	tags=38%, list=24%, signal=49%
GO_DNA_TEMPLATED_TRANSCRIPTION_TERMINATION	72	0.403616	1.82712	0	0.0258454	0.97	4759	tags=49%, list=25%, signal=65%
GO_DNA_SECONDARY_STRUCTURE_BINDING	33	0.460956	1.82419	0	0.0260863	0.972	1937	tags=36%, list=10%, signal=40%
GO_REGULATION_OF_DNA_TEMPLATED_TRANSCRIPTION_ELONGATION	48	0.431889	1.82138	0	0.0264207	0.972	3750	tags=40%, list=20%, signal=49%
GO_PROTEIN_TRANSMEMBRANE_IMPORT_INTO_INTRACELLULAR_ORGANELLE	35	0.449299	1.81935	0	0.0266813	0.974	2707	tags=40%, list=14%, signal=47%
GO_N_ACYLTRANSFERASE_ACTIVITY	107	0.360379	1.81929	0	0.0266006	0.974	4080	tags=36%, list=21%, signal=45%
GO_MITOCHONDRIAL_FISSION	41	0.445126	1.81769	0	0.0265824	0.975	1687	tags=37%, list=9%, signal=40%
GO_CATALYTIC_ACTIVITY_ACTING_ON_A_TRNA	121	0.36476	1.81536	0	0.0268532	0.976	3896	tags=37%, list=20%, signal=46%
GO_SITE_OF_DNA_DAMAGE	81	0.397788	1.81087	0	0.0274955	0.977	3597	tags=42%, list=19%, signal=52%
GO_PROTEIN_TRANSMEMBRANE_TRANSPORT	60	0.403626	1.8106	0	0.0274667	0.977	2707	tags=35%, list=14%, signal=41%
GO_RAN_GTPASE_BINDING	41	0.44265	1.80899	0	0.0276824	0.977	4304	tags=44%, list=23%, signal=57%
GO_HISTONE_H3_K4_METHYLATION	54	0.414122	1.79451	0	0.0301364	0.986	3420	tags=39%, list=18%, signal=47%
GO_RNA_DEPENDENT_DNA_BIOSYNTHETIC_PROCESS	70	0.39886	1.7915	0	0.0308611	0.988	3771	tags=40%, list=20%, signal=50%
GO_PROTEIN_KINASE_COMPLEX	103	0.375238	1.78708	0	0.0318383	0.99	2658	tags=31%, list=14%, signal=36%
GO_PROTEIN_ACETYLTRANSFERASE_COMPLEX	92	0.384256	1.78322	0	0.0324012	0.99	3570	tags=34%, list=19%, signal=41%
GO_CYCLIN_DEPENDENT_PROTEIN_KINASE_HOLOENZYME_COMPLEX	43	0.428344	1.78103	0	0.0326865	0.99	2877	tags=40%, list=15%, signal=46%
GO_ANTIGEN_PROCESSING_AND_PRESENTATION_OF_PEPTIDE_OR_POLYSACCHARIDE_ANTIGEN_VIA_MHC_CLASS_II	89	0.370852	1.78075	0	0.0326354	0.99	1966	tags=27%, list=10%, signal=30%
GO_MEMBRANE_DOCKING	180	0.320063	1.78075	0	0.0325368	0.99	2458	tags=27%, list=13%, signal=30%
GO_CYTOSKELETON_DEPENDENT_CYTOKINESIS	100	0.380107	1.77433	0	0.033878	0.992	3511	tags=38%, list=18%, signal=46%
GO_INTRACILIARY_TRANSPORT	50	0.409685	1.77358	0	0.0339823	0.992	5590	tags=60%, list=29%, signal=85%
GO_MANNOSYLTRANSFERASE_ACTIVITY	28	0.474669	1.76602	0	0.0353586	0.994	4467	tags=54%, list=23%, signal=70%
GO_REGULATION_OF_DOUBLE_STRAND_BREAK_REPAIR_VIA_HOMOLOGOUS_RECOMBINATION	47	0.406001	1.7642	0	0.0355029	0.994	2463	tags=36%, list=13%, signal=41%
GO_MANNOSYLATION	37	0.432747	1.76371	0	0.0354587	0.994	3781	tags=46%, list=20%, signal=57%
GO_REGULATION_OF_NUCLEAR_DIVISION	186	0.339771	1.76348	0	0.0354092	0.994	1511	tags=26%, list=8%, signal=28%
GO_RNA_POLYMERASE_ACTIVITY	40	0.428395	1.76172	0	0.0357915	0.994	2995	tags=35%, list=16%, signal=41%
GO_ANAPHASE_PROMOTING_COMPLEX_DEPENDENT_CATABOLIC_PROCESS	82	0.366908	1.75684	0	0.036796	0.994	3096	tags=34%, list=16%, signal=41%
GO_REGULATION_OF_MICROTUBULE_CYTOSKELETON_ORGANIZATION	190	0.335702	1.75672	0	0.0367285	0.995	2027	tags=27%, list=11%, signal=30%
GO_DAMAGED_DNA_BINDING	65	0.397776	1.74896	0	0.0382965	0.995	3468	tags=43%, list=18%, signal=52%
GO_PROTEIN_TRANSPORT_ALONG_MICROTUBULE	65	0.39443	1.74679	0	0.0386992	0.995	5729	tags=58%, list=30%, signal=83%
GO_CYTOPLASMIC_STRESS_GRANULE	74	0.357146	1.74293	0	0.0396129	0.995	3773	tags=43%, list=20%, signal=54%
GO_MRNA_MODIFICATION	24	0.489364	1.73505	0	0.0409608	0.998	3803	tags=50%, list=20%, signal=62%
GO_ENDOPLASMIC_RETICULUM_ORGANIZATION	69	0.382814	1.73257	0	0.0415619	0.998	2980	tags=33%, list=16%, signal=39%
GO_SYNAPTONEMAL_STRUCTURE	42	0.417243	1.72959	0	0.0422039	0.998	2654	tags=31%, list=14%, signal=36%
GO_TRICARBOXYLIC_ACID_CYCLE	34	0.431273	1.72815	0	0.0424564	0.998	3919	tags=38%, list=21%, signal=48%
GO_REGULATION_OF_SIGNAL_TRANSDUCTION_BY_P53_CLASS_MEDIATOR	179	0.326514	1.7273	0	0.0426326	0.998	2850	tags=33%, list=15%, signal=38%
GO_KINESIN_COMPLEX	50	0.397569	1.72488	0	0.0429928	0.998	2913	tags=46%, list=15%, signal=54%
GO_POSITIVE_REGULATION_OF_TELOMERE_MAINTENANCE	51	0.390907	1.72364	0	0.0431223	0.998	3874	tags=49%, list=20%, signal=61%
GO_REGULATION_OF_DNA_REPAIR	131	0.350073	1.72159	0	0.0435063	0.998	2463	tags=29%, list=13%, signal=33%
GO_RNA_LOCALIZATION	233	0.325353	1.71985	0	0.0437354	0.998	3891	tags=35%, list=20%, signal=43%
GO_SNRNA_TRANSCRIPTION	74	0.377443	1.71347	0	0.0447936	1	3540	tags=35%, list=19%, signal=43%
GO_POSITIVE_REGULATION_OF_TELOMERE_MAINTENANCE_VIA_TELOMERE_LENGTHENING	37	0.422897	1.7018	0	0.0472664	1	3771	tags=49%, list=20%, signal=61%
GO_SIGNAL_SEQUENCE_BINDING	48	0.391182	1.69782	0	0.0481826	1	3225	tags=40%, list=17%, signal=48%
GO_TRANSCRIPTION_COUPLED_NUCLEOTIDE_EXCISION_REPAIR	73	0.368114	1.69758	0	0.0481637	1	2877	tags=30%, list=15%, signal=35%
GO_RNA_POLYMERASE_BINDING	62	0.374412	1.6972	0	0.048156	1	4677	tags=52%, list=25%, signal=68%
GO_TRANSLATION_REGULATOR_ACTIVITY	135	0.32161	1.69546	0	0.0484966	1	4045	tags=39%, list=21%, signal=49%
GO_MITOTIC_DNA_INTEGRITY_CHECKPOINT	107	0.34312	1.68893	0	0.0501371	1	3904	tags=45%, list=20%, signal=56%
GO_PEPTIDYL_LYSINE_METHYLATION	126	0.32265	1.68467	0	0.0515137	1	3420	tags=35%, list=18%, signal=42%
GO_MALE_MEIOTIC_NUCLEAR_DIVISION	47	0.402821	1.67854	0	0.0530369	1	3243	tags=36%, list=17%, signal=43%
GO_CLATHRIN_COAT	46	0.401975	1.67715	0	0.0532719	1	2644	tags=30%, list=14%, signal=35%
GO_ACETYLTRANSFERASE_ACTIVITY	105	0.33627	1.67516	0	0.0538715	1	3739	tags=31%, list=20%, signal=39%
GO_NEGATIVE_REGULATION_OF_CELL_CYCLE_G2_M_PHASE_TRANSITION	104	0.345927	1.67312	0	0.0540098	1	3096	tags=34%, list=16%, signal=40%
GO_S_ADENOSYLMETHIONINE_DEPENDENT_METHYLTRANSFERASE_ACTIVITY	156	0.305142	1.67065	0	0.0545637	1	3534	tags=32%, list=19%, signal=39%
GO_REGULATION_OF_GENE_SILENCING	121	0.334041	1.66936	0	0.05458	1	3415	tags=40%, list=18%, signal=49%
GO_RNA_METHYLATION	81	0.354572	1.66624	0	0.0551095	1	3803	tags=33%, list=20%, signal=41%
GO_PROTEIN_SUMOYLATION	81	0.34667	1.66279	0	0.055947	1	4951	tags=52%, list=26%, signal=70%
GO_TRANSLESION_SYNTHESIS	42	0.40812	1.65813	0	0.0571696	1	4417	tags=48%, list=23%, signal=62%
GO_HETEROCHROMATIN_ORGANIZATION	74	0.348419	1.65794	0	0.0571113	1	4139	tags=38%, list=22%, signal=48%
GO_ENDOPLASMIC_RETICULUM_EXIT_SITE	30	0.443544	1.65586	0	0.0578588	1	2451	tags=37%, list=13%, signal=42%
GO_REGULATION_OF_POSTTRANSCRIPTIONAL_GENE_SILENCING	111	0.32835	1.64812	0	0.0594423	1	3415	tags=41%, list=18%, signal=49%
GO_RNA_3_END_PROCESSING	149	0.348788	1.64736	0	0.0596495	1	3915	tags=34%, list=21%, signal=42%
GO_ESTABLISHMENT_OF_RNA_LOCALIZATION	200	0.322581	1.64677	0	0.0597048	1	3608	tags=33%, list=19%, signal=40%
GO_POST_GOLGI_VESICLE_MEDIATED_TRANSPORT	103	0.331048	1.64398	0	0.0605788	1	4555	tags=43%, list=24%, signal=56%
GO_GENE_SILENCING	247	0.292661	1.64306	0	0.0607938	1	4059	tags=37%, list=21%, signal=47%
GO_MEMBRANE_COAT	94	0.350213	1.6419	0	0.0610861	1	4111	tags=38%, list=22%, signal=49%
GO_GOLGI_ORGANIZATION	146	0.307526	1.64063	0	0.0613163	1	2679	tags=29%, list=14%, signal=34%
GO_PEPTIDASE_COMPLEX	91	0.34609	1.63981	0	0.0614581	1	3096	tags=32%, list=16%, signal=38%
GO_OMEGA_PEPTIDASE_ACTIVITY	119	0.329499	1.63707	0	0.0623915	1	4622	tags=44%, list=24%, signal=57%
GO_CATALYTIC_ACTIVITY_ACTING_ON_RNA	376	0.285076	1.63203	0	0.0640385	1	3915	tags=32%, list=21%, signal=39%
GO_MITOCHONDRIAL_GENE_EXPRESSION	165	0.305293	1.62921	0	0.0644243	1	3001	tags=25%, list=16%, signal=29%
GO_TRANSLATION_FACTOR_ACTIVITY_RNA_BINDING	83	0.339633	1.62888	0	0.0644178	1	4045	tags=37%, list=21%, signal=47%
GO_MICROTUBULE_BINDING	264	0.276969	1.62883	0	0.0643126	1	2685	tags=30%, list=14%, signal=35%
GO_ESTABLISHMENT_OF_SPINDLE_ORIENTATION	36	0.391577	1.62615	0	0.0650584	1	2193	tags=31%, list=12%, signal=34%
GO_MICROTUBULE_ASSOCIATED_COMPLEX	152	0.302493	1.62082	0	0.0666249	1	2913	tags=32%, list=15%, signal=38%
GO_COPII_COATED_VESICLE_BUDDING	72	0.345622	1.61971	0	0.0667621	1	2811	tags=32%, list=15%, signal=37%
GO_RNA_METHYLTRANSFERASE_ACTIVITY	68	0.344188	1.61904	0	0.066801	1	3803	tags=34%, list=20%, signal=42%
GO_RNA_CAPPING	34	0.413486	1.61443	0	0.0681854	1	2981	tags=32%, list=16%, signal=38%
GO_NUCLEAR_EXPORT	202	0.296696	1.60649	0	0.07024	1	4411	tags=38%, list=23%, signal=48%
GO_POSITIVE_REGULATION_OF_CHROMOSOME_ORGANIZATION	181	0.306023	1.60276	0	0.0708633	1	4047	tags=39%, list=21%, signal=49%
GO_NCRNA_TRANSCRIPTION	108	0.319665	1.60191	0	0.0710542	1	3540	tags=33%, list=19%, signal=41%
GO_PROTEIN_METHYLATION	177	0.309476	1.60089	0	0.0713971	1	3420	tags=33%, list=18%, signal=40%
GO_POSITIVE_REGULATION_OF_HISTONE_METHYLATION	40	0.384395	1.59712	0	0.072714	1	5034	tags=48%, list=26%, signal=64%
GO_RIBOSOME_BINDING	57	0.360047	1.59508	0	0.0735013	1	3858	tags=42%, list=20%, signal=53%
GO_TRNA_METABOLIC_PROCESS	183	0.300945	1.5938	0	0.0738904	1	3896	tags=33%, list=20%, signal=41%
GO_VESICLE_TARGETING	93	0.328251	1.59295	0	0.0739572	1	2811	tags=29%, list=15%, signal=34%
GO_REGULATION_OF_MICROTUBULE_BASED_PROCESS	238	0.286467	1.59275	0	0.0739185	1	2027	tags=24%, list=11%, signal=26%
GO_CILIARY_BASAL_BODY	152	0.301662	1.59051	0	0.0743873	1	3136	tags=34%, list=16%, signal=40%
GO_CELL_CYCLE_G1_S_PHASE_TRANSITION	271	0.247438	1.58553	0	0.0759691	1	3483	tags=34%, list=18%, signal=41%
GO_VESICLE_TETHERING_COMPLEX	69	0.346508	1.58502	0	0.0760568	1	5016	tags=52%, list=26%, signal=71%
GO_PROTEIN_CONTAINING_COMPLEX_LOCALIZATION	286	0.319554	1.57352	0	0.0800602	1	3364	tags=31%, list=18%, signal=37%
GO_POSITIVE_REGULATION_OF_CELL_CYCLE_PHASE_TRANSITION	97	0.337651	1.55894	0	0.0852118	1	1735	tags=28%, list=9%, signal=30%
GO_SIGNAL_TRANSDUCTION_BY_P53_CLASS_MEDIATOR	266	0.278143	1.55621	0	0.0862177	1	2877	tags=30%, list=15%, signal=35%
GO_GOLGI_VESICLE_BUDDING	80	0.332056	1.55448	0	0.0863159	1	3188	tags=33%, list=17%, signal=39%
GO_PROTEIN_METHYLTRANSFERASE_ACTIVITY	89	0.308892	1.55418	0	0.0861905	1	3412	tags=34%, list=18%, signal=41%
GO_POSITIVE_REGULATION_OF_MITOTIC_CELL_CYCLE	154	0.294624	1.54095	0	0.0907971	1	1511	tags=23%, list=8%, signal=25%
GO_EXONUCLEASE_ACTIVITY_ACTIVE_WITH_EITHER_RIBO_OR_DEOXYRIBONUCLEIC_ACIDS_AND_PRODUCING_5_PHOSPHOMONOESTERS	57	0.3562	1.53405	0	0.0936169	1	4607	tags=47%, list=24%, signal=62%
GO_NUCLEOTIDYLTRANSFERASE_ACTIVITY	123	0.311105	1.51704	0	0.101641	1	3092	tags=28%, list=16%, signal=34%
GO_CYTOPLASMIC_MICROTUBULE	78	0.321358	1.51359	0	0.102727	1	2571	tags=36%, list=13%, signal=41%
GO_HISTONE_METHYLATION	139	0.289479	1.51337	0	0.102478	1	3420	tags=34%, list=18%, signal=41%
GO_TRNA_BINDING	66	0.334043	1.51016	0	0.103499	1	2717	tags=30%, list=14%, signal=35%
GO_NEGATIVE_REGULATION_OF_DNA_METABOLIC_PROCESS	114	0.307827	1.50243	0	0.106897	1	2136	tags=25%, list=11%, signal=27%
GO_DEOXYRIBONUCLEASE_ACTIVITY	58	0.333942	1.49777	0	0.109012	1	2148	tags=31%, list=11%, signal=35%
GO_POLYSOME	69	0.323334	1.49239	0	0.111327	1	3774	tags=38%, list=20%, signal=47%
GO_LIGASE_ACTIVITY	162	0.286947	1.48069	0	0.11722	1	3896	tags=33%, list=20%, signal=42%
GO_MITOCHONDRIAL_TRANSLATION	135	0.301711	1.47998	0	0.11735	1	3001	tags=24%, list=16%, signal=29%
GO_ATPASE_COMPLEX	78	0.319888	1.47943	0	0.117163	1	4144	tags=42%, list=22%, signal=54%
GO_NUCLEAR_MATRIX	109	0.289411	1.47658	0	0.117811	1	1881	tags=22%, list=10%, signal=24%
GO_MIDBODY	182	0.275164	1.47314	0	0.11948	1	1312	tags=18%, list=7%, signal=19%
GO_VESICLE_TARGETING_TO_FROM_OR_WITHIN_GOLGI	73	0.311983	1.46346	0	0.123027	1	2811	tags=29%, list=15%, signal=34%
GO_UBIQUITIN_LIKE_PROTEIN_BINDING	94	0.288744	1.46067	0	0.124195	1	3336	tags=32%, list=18%, signal=38%
GO_TRNA_PROCESSING	128	0.278893	1.45186	0	0.127881	1	2478	tags=23%, list=13%, signal=26%
GO_REGULATION_OF_RESPONSE_TO_DNA_DAMAGE_STIMULUS	223	0.288899	1.45138	0	0.128096	1	2463	tags=26%, list=13%, signal=29%
GO_SITE_OF_DOUBLE_STRAND_BREAK	61	0.336339	1.44703	0	0.129404	1	3597	tags=38%, list=19%, signal=46%
GO_NEGATIVE_REGULATION_OF_CELL_CYCLE_PHASE_TRANSITION	241	0.247778	1.44596	0	0.129708	1	3481	tags=33%, list=18%, signal=40%
GO_INTRINSIC_COMPONENT_OF_MITOCHONDRIAL_MEMBRANE	80	0.312805	1.44202	0	0.132187	1	2836	tags=30%, list=15%, signal=35%
GO_MRNA_TRANSPORT	149	0.281189	1.43628	0	0.13435	1	3608	tags=30%, list=19%, signal=36%
GO_PROTEIN_MODIFICATION_BY_SMALL_PROTEIN_REMOVAL	292	0.2763	1.42586	0	0.139978	1	3582	tags=30%, list=19%, signal=37%
GO_POSITIVE_REGULATION_OF_DNA_REPAIR	71	0.308321	1.42241	0	0.141642	1	3252	tags=34%, list=17%, signal=41%
GO_INTERCELLULAR_BRIDGE	71	0.31051	1.42126	0	0.14203	1	1238	tags=21%, list=6%, signal=23%
GO_REGULATION_OF_GENE_EXPRESSION_EPIGENETIC	185	0.270361	1.41629	0	0.143939	1	3588	tags=31%, list=19%, signal=38%
GO_VESICLE_CYTOSKELETAL_TRAFFICKING	75	0.300746	1.40946	0	0.147306	1	2990	tags=32%, list=16%, signal=38%
GO_CELLULAR_RESPONSE_TO_HEAT	121	0.278832	1.4053	0	0.149192	1	3161	tags=32%, list=17%, signal=38%
GO_PRERIBOSOME	76	0.304195	1.40155	0	0.150468	1	2939	tags=24%, list=15%, signal=28%
GO_NUCLEAR_PERIPHERY	131	0.27952	1.39523	0	0.154639	1	1940	tags=21%, list=10%, signal=24%
GO_INTRINSIC_COMPONENT_OF_ENDOPLASMIC_RETICULUM_MEMBRANE	148	0.2708	1.38972	0	0.157994	1	2969	tags=26%, list=16%, signal=31%
GO_UBIQUITIN_LIGASE_COMPLEX	286	0.252861	1.38868	0	0.158152	1	4030	tags=34%, list=21%, signal=42%
GO_NUCLEOSIDE_BISPHOSPHATE_BIOSYNTHETIC_PROCESS	67	0.304838	1.37886	0	0.164649	1	1771	tags=21%, list=9%, signal=23%
GO_PML_BODY	101	0.273614	1.37171	0	0.169128	1	2084	tags=27%, list=11%, signal=30%
GO_ERAD_PATHWAY	99	0.273554	1.36828	0	0.171255	1	3348	tags=32%, list=18%, signal=39%
GO_REGULATION_OF_MACROAUTOPHAGY	176	0.255587	1.35419	0	0.178461	1	4194	tags=35%, list=22%, signal=44%
GO_REGULATION_OF_CELLULAR_PH	92	0.284157	1.3528	0	0.179284	1	4020	tags=30%, list=21%, signal=38%
GO_MOTOR_ACTIVITY	129	0.266101	1.35151	0	0.17972	1	2913	tags=31%, list=15%, signal=36%
GO_VESICLE_LOCALIZATION	227	0.253834	1.35145	0	0.179549	1	2817	tags=27%, list=15%, signal=31%
GO_ANTIGEN_PROCESSING_AND_PRESENTATION_OF_PEPTIDE_ANTIGEN	172	0.25828	1.34323	0	0.185735	1	3188	tags=27%, list=17%, signal=32%
GO_REGULATION_OF_ORGANELLE_ASSEMBLY	190	0.240203	1.32741	0	0.19634	1	3358	tags=29%, list=18%, signal=35%
GO_PROTEIN_POLYUBIQUITINATION	336	0.23768	1.30512	0	0.211549	1	3843	tags=31%, list=20%, signal=38%
GO_CYTOSKELETON_DEPENDENT_INTRACELLULAR_TRANSPORT	196	0.239426	1.30367	0	0.212531	1	3446	tags=30%, list=18%, signal=36%
GO_MACROAUTOPHAGY	308	0.238261	1.30055	0	0.215386	1	3697	tags=30%, list=19%, signal=36%
GO_SIGNAL_TRANSDUCTION_IN_RESPONSE_TO_DNA_DAMAGE	131	0.256517	1.30045	0	0.215257	1	3170	tags=34%, list=17%, signal=40%
GO_ENDOPLASMIC_RETICULUM_TO_GOLGI_VESICLE_MEDIATED_TRANSPORT	203	0.239355	1.30024	0	0.215037	1	3188	tags=27%, list=17%, signal=32%
GO_TRANSPORT_ALONG_MICROTUBULE	157	0.244524	1.29769	0	0.216291	1	3446	tags=29%, list=18%, signal=35%
GO_MICROTUBULE_BASED_TRANSPORT	184	0.244789	1.29213	0	0.219706	1	3446	tags=29%, list=18%, signal=35%
GO_RIBOSOME_BIOGENESIS	302	0.223213	1.2918	0	0.21988	1	3017	tags=21%, list=16%, signal=24%
GO_NUCLEIC_ACID_PHOSPHODIESTER_BOND_HYDROLYSIS	301	0.228424	1.28249	0	0.225998	1	3086	tags=25%, list=16%, signal=29%
GO_HETEROCHROMATIN	76	0.279348	1.28201	0	0.226333	1	3931	tags=42%, list=21%, signal=53%
GO_RNA_MODIFICATION	164	0.235913	1.27705	0	0.230709	1	3940	tags=30%, list=21%, signal=38%
GO_TRANSPORT_VESICLE_MEMBRANE	189	0.243521	1.27492	0	0.231874	1	3208	tags=29%, list=17%, signal=35%
GO_CULLIN_RING_UBIQUITIN_LIGASE_COMPLEX	161	0.232585	1.27015	0	0.236737	1	4682	tags=39%, list=25%, signal=51%
GO_NUCLEASE_ACTIVITY	201	0.231149	1.26658	0	0.239106	1	2664	tags=23%, list=14%, signal=27%
GO_DNA_BIOSYNTHETIC_PROCESS	189	0.222443	1.25275	0	0.247864	1	3771	tags=31%, list=20%, signal=39%
GO_REGULATION_OF_MRNA_CATABOLIC_PROCESS	205	0.234719	1.24286	0	0.255309	1	3783	tags=31%, list=20%, signal=38%
GO_TRANSFERASE_ACTIVITY_TRANSFERRING_ACYL_GROUPS	257	0.205553	1.24172	0	0.25658	1	3114	tags=24%, list=16%, signal=28%
GO_POSITIVE_REGULATION_OF_DNA_METABOLIC_PROCESS	200	0.243045	1.23272	0	0.265202	1	3380	tags=34%, list=18%, signal=41%
GO_RIBONUCLEOPROTEIN_COMPLEX_SUBUNIT_ORGANIZATION	196	0.231979	1.2317	0	0.266337	1	4968	tags=36%, list=26%, signal=48%
GO_PLASMA_MEMBRANE_BOUNDED_CELL_PROJECTION_CYTOPLASM	205	0.224187	1.21917	0	0.277911	1	3667	tags=29%, list=19%, signal=35%
GO_PROTEIN_ACETYLATION	200	0.216594	1.19931	0	0.297241	1	2852	tags=23%, list=15%, signal=27%
GO_MICROTUBULE_POLYMERIZATION_OR_DEPOLYMERIZATION	117	0.239383	1.19347	0	0.302233	1	2696	tags=28%, list=14%, signal=33%
GO_TRANSFERASE_ACTIVITY_TRANSFERRING_ONE_CARBON_GROUPS	221	0.216876	1.17397	0	0.32449	1	2981	tags=24%, list=16%, signal=29%
GO_CYTOPLASMIC_REGION	248	0.218756	1.13022	0	0.378267	1	3667	tags=29%, list=19%, signal=35%
GO_CELLULAR_AMINO_ACID_METABOLIC_PROCESS	336	0.20685	1.11685	0	0.39492	1	4716	tags=36%, list=25%, signal=47%
GO_NUCLEAR_MEMBRANE	301	0.207335	1.05267	0	0.479678	1	2762	tags=24%, list=14%, signal=28%
GO_P_BODY_ASSEMBLY	21	0.58987	2.03622	0.00487805	0.0078667	0.448	6126	tags=76%, list=32%, signal=112%
GO_NEGATIVE_REGULATION_OF_TELOMERE_MAINTENANCE_VIA_TELOMERE_LENGTHENING	27	0.49532	1.81905	0.00534759	0.0265655	0.974	3586	tags=41%, list=19%, signal=50%
GO_DNA_DIRECTED_DNA_POLYMERASE_ACTIVITY	24	0.474037	1.73847	0.00540541	0.0404651	0.998	4846	tags=63%, list=25%, signal=84%
GO_BRANCHED_CHAIN_AMINO_ACID_METABOLIC_PROCESS	25	0.51892	1.85029	0.00552486	0.0232314	0.946	3417	tags=40%, list=18%, signal=49%
GO_RNA_POLYMERASE_II_PREINITIATION_COMPLEX_ASSEMBLY	24	0.520474	1.81618	0.00564972	0.0267116	0.975	5829	tags=50%, list=31%, signal=72%
GO_ERROR_FREE_TRANSLESION_SYNTHESIS	22	0.487226	1.71895	0.00574713	0.0437306	0.998	4417	tags=50%, list=23%, signal=65%
GO_HISTONE_H2A_UBIQUITINATION	26	0.528276	1.90773	0.00598802	0.0170386	0.836	3942	tags=54%, list=21%, signal=68%
GO_REGULATION_OF_TELOMERE_CAPPING	26	0.402068	1.53827	0.00606061	0.0920696	1	3771	tags=46%, list=20%, signal=57%
GO_REGULATION_OF_TRANSCRIPTION_ELONGATION_FROM_RNA_POLYMERASE_II_PROMOTER	27	0.467832	1.72594	0.00609756	0.0428509	0.998	5539	tags=63%, list=29%, signal=89%
GO_NUCLEOTIDE_EXCISION_REPAIR_DNA_GAP_FILLING	23	0.460961	1.62548	0.00625	0.0651987	1	4372	tags=43%, list=23%, signal=56%
GO_MICROTUBULE_NUCLEATION	29	0.496247	1.89447	0.00641026	0.0181689	0.868	3136	tags=41%, list=16%, signal=49%
GO_POSITIVE_REGULATION_OF_TRANSCRIPTION_INITIATION_FROM_RNA_POLYMERASE_II_PROMOTER	29	0.425563	1.60567	0.00666667	0.0703909	1	2229	tags=31%, list=12%, signal=35%
GO_DNA_POLYMERASE_ACTIVITY	30	0.498084	1.90966	0.0070922	0.0170332	0.829	4846	tags=63%, list=25%, signal=85%
GO_PROTEIN_LOCALIZATION_TO_CHROMATIN	27	0.509189	1.90241	0.00719425	0.0172555	0.848	4139	tags=59%, list=22%, signal=76%
GO_NEGATIVE_REGULATION_OF_DNA_RECOMBINATION	34	0.459358	1.78613	0.00719425	0.0319001	0.99	3252	tags=47%, list=17%, signal=57%
GO_TRANSCRIPTION_PREINITIATION_COMPLEX_ASSEMBLY	35	0.441128	1.70504	0.00724638	0.046264	1	2292	tags=29%, list=12%, signal=32%
GO_DNA_REPAIR_COMPLEX	35	0.4519	1.7109	0.00757576	0.0450854	1	2654	tags=37%, list=14%, signal=43%
GO_DE_NOVO_PROTEIN_FOLDING	38	0.38352	1.53164	0.00787402	0.0944156	1	2724	tags=34%, list=14%, signal=40%
GO_BASE_EXCISION_REPAIR	40	0.356154	1.47106	0.00787402	0.120209	1	3468	tags=33%, list=18%, signal=40%
GO_TRNA_METHYLATION	40	0.384085	1.59806	0.00806452	0.0723532	1	3803	tags=38%, list=20%, signal=47%
GO_INTRACILIARY_TRANSPORT_INVOLVED_IN_CILIUM_ASSEMBLY	38	0.471276	1.85965	0.00813008	0.022313	0.935	5590	tags=66%, list=29%, signal=93%
GO_GENERAL_TRANSCRIPTION_INITIATION_FACTOR_ACTIVITY	41	0.385166	1.59316	0.00840336	0.0740236	1	3014	tags=29%, list=16%, signal=35%
GO_ENDONUCLEASE_ACTIVITY_ACTIVE_WITH_EITHER_RIBO_OR_DEOXYRIBONUCLEIC_ACIDS_AND_PRODUCING_5_PHOSPHOMONOESTERS	42	0.391502	1.60613	0.00862069	0.0702509	1	2148	tags=29%, list=11%, signal=32%
GO_TRANSCRIPTION_BY_RNA_POLYMERASE_III	47	0.412034	1.74788	0.00909091	0.0384931	0.995	3299	tags=43%, list=17%, signal=51%
GO_SPINDLE_MIDZONE	36	0.467773	1.88197	0.00925926	0.0195437	0.9	2821	tags=44%, list=15%, signal=52%
GO_NUCLEAR_IMPORT_SIGNAL_RECEPTOR_ACTIVITY	20	0.513538	1.78189	0.00980392	0.0326636	0.99	4052	tags=50%, list=21%, signal=63%
GO_NUCLEOID	43	0.396232	1.66176	0.00990099	0.0561326	1	3237	tags=35%, list=17%, signal=42%
GO_HOMOLOGOUS_CHROMOSOME_PAIRING_AT_MEIOSIS	49	0.384466	1.68155	0.0103093	0.0525692	1	2654	tags=29%, list=14%, signal=33%
GO_MITOTIC_G2_DNA_DAMAGE_CHECKPOINT	23	0.482392	1.69289	0.0107527	0.0492441	1	2131	tags=43%, list=11%, signal=49%
GO_MICROTUBULE_DEPOLYMERIZATION	46	0.370192	1.56487	0.0108696	0.0837185	1	1910	tags=28%, list=10%, signal=31%
GO_PEPTIDYL_LYSINE_TRIMETHYLATION	49	0.361838	1.55444	0.0108696	0.0861751	1	3369	tags=39%, list=18%, signal=47%
GO_REGULATION_OF_CHOLESTEROL_BIOSYNTHETIC_PROCESS	44	0.384187	1.6185	0.0111111	0.0668911	1	2735	tags=39%, list=14%, signal=45%
GO_POSITIVE_REGULATION_OF_TRANSCRIPTION_BY_RNA_POLYMERASE_I	21	0.501699	1.75221	0.0112994	0.0376164	0.995	3013	tags=43%, list=16%, signal=51%
GO_BASAL_TRANSCRIPTION_MACHINERY_BINDING	57	0.350658	1.55075	0.0119048	0.0867639	1	3945	tags=42%, list=21%, signal=53%
GO_REGULATION_OF_MITOCHONDRIAL_FISSION	27	0.451574	1.67984	0.0125	0.0527333	1	1653	tags=37%, list=9%, signal=40%
GO_LYSINE_N_METHYLTRANSFERASE_ACTIVITY	60	0.314526	1.42066	0.0125	0.142378	1	3412	tags=33%, list=18%, signal=40%
GO_NUCLEAR_RECEPTOR_TRANSCRIPTION_COACTIVATOR_ACTIVITY	54	0.318236	1.4173	0.0125	0.143335	1	2455	tags=28%, list=13%, signal=32%
GO_SYNTAXIN_1_BINDING	26	0.439337	1.60872	0.013245	0.0695992	1	3041	tags=38%, list=16%, signal=46%
GO_MICROBODY_MEMBRANE	60	0.344928	1.49152	0.0135135	0.11172	1	3690	tags=42%, list=19%, signal=52%
GO_TRANSCRIPTION_INITIATION_FROM_RNA_POLYMERASE_I_PROMOTER	33	0.39748	1.57392	0.0137931	0.0800327	1	2062	tags=30%, list=11%, signal=34%
GO_MISMATCH_REPAIR	32	0.402556	1.58771	0.0138889	0.0752588	1	3698	tags=41%, list=19%, signal=50%
GO_TRANSCRIPTION_BY_RNA_POLYMERASE_I	61	0.335091	1.51751	0.0144928	0.101476	1	3013	tags=34%, list=16%, signal=41%
GO_ENDODEOXYRIBONUCLEASE_ACTIVITY	40	0.371282	1.53337	0.0149254	0.093895	1	2148	tags=33%, list=11%, signal=37%
GO_POSITIVE_REGULATION_OF_DOUBLE_STRAND_BREAK_REPAIR	36	0.385354	1.54162	0.0150376	0.090767	1	1842	tags=31%, list=10%, signal=34%
GO_PROTEIN_K48_LINKED_DEUBIQUITINATION	36	0.40356	1.64506	0.0153846	0.0602895	1	1698	tags=31%, list=9%, signal=33%
GO_PROTEIN_REFOLDING	22	0.420337	1.49633	0.015625	0.109709	1	4794	tags=55%, list=25%, signal=73%
GO_BETA_TUBULIN_BINDING	37	0.369777	1.45709	0.015625	0.125459	1	3079	tags=49%, list=16%, signal=58%
GO_REGULATION_OF_HISTONE_METHYLATION	66	0.304384	1.377	0.015625	0.165747	1	3420	tags=33%, list=18%, signal=40%
GO_CAJAL_BODY	57	0.333421	1.48322	0.015873	0.11605	1	3299	tags=40%, list=17%, signal=49%
GO_REGULATION_OF_TRANSCRIPTION_INITIATION_FROM_RNA_POLYMERASE_II_PROMOTER	35	0.415892	1.68977	0.016	0.05	1	2292	tags=31%, list=12%, signal=36%
GO_GPI_ANCHOR_METABOLIC_PROCESS	32	0.37834	1.49761	0.016	0.108969	1	2587	tags=31%, list=14%, signal=36%
GO_AXONEME_ASSEMBLY	66	0.292646	1.34295	0.016129	0.185773	1	6513	tags=50%, list=34%, signal=76%
GO_METAL_CLUSTER_BINDING	65	0.34384	1.52767	0.0163934	0.0959885	1	2818	tags=28%, list=15%, signal=32%
GO_PROTEIN_DEGLYCOSYLATION	28	0.427085	1.59218	0.0169492	0.073891	1	4203	tags=43%, list=22%, signal=55%
GO_SPERMATID_NUCLEUS_DIFFERENTIATION	22	0.472813	1.65524	0.0171429	0.057951	1	4486	tags=41%, list=24%, signal=53%
GO_CHROMATIN_SILENCING	62	0.33034	1.5073	0.0172414	0.104794	1	4011	tags=35%, list=21%, signal=45%
GO_COPII_COATED_ER_TO_GOLGI_TRANSPORT_VESICLE	76	0.280684	1.32092	0.0178571	0.201074	1	2263	tags=28%, list=12%, signal=31%
GO_PCG_PROTEIN_COMPLEX	47	0.355361	1.48717	0.018018	0.113661	1	3385	tags=38%, list=18%, signal=46%
GO_HISTONE_H3_K36_METHYLATION	16	0.560642	1.71726	0.0183486	0.0439867	0.999	2852	tags=50%, list=15%, signal=59%
GO_MITOCHONDRIAL_RNA_METABOLIC_PROCESS	46	0.413238	1.72831	0.0185185	0.0425086	0.998	2493	tags=30%, list=13%, signal=35%
GO_CYTOKINETIC_PROCESS	39	0.36445	1.47672	0.0190476	0.118088	1	3265	tags=36%, list=17%, signal=43%
GO_BINDING_OF_SPERM_TO_ZONA_PELLUCIDA	42	0.378494	1.56826	0.0192308	0.0822823	1	5942	tags=57%, list=31%, signal=83%
GO_POSITIVE_REGULATION_OF_GENE_EXPRESSION_EPIGENETIC	46	0.350887	1.47831	0.0192308	0.11772	1	2500	tags=28%, list=13%, signal=32%
GO_AP_TYPE_MEMBRANE_COAT_ADAPTOR_COMPLEX	41	0.374252	1.51237	0.0196078	0.10285	1	2644	tags=29%, list=14%, signal=34%
GO_HISTONE_LYSINE_N_METHYLTRANSFERASE_ACTIVITY	44	0.353243	1.42466	0.0196078	0.140515	1	3412	tags=41%, list=18%, signal=50%
GO_NUCLEAR_UBIQUITIN_LIGASE_COMPLEX	43	0.366495	1.52846	0.02	0.0958002	1	3480	tags=40%, list=18%, signal=48%
GO_MICROTUBULE_ORGANIZING_CENTER_LOCALIZATION	31	0.445631	1.64173	0.0201342	0.0610209	1	2153	tags=32%, list=11%, signal=36%
GO_UBIQUITIN_BINDING	76	0.312817	1.47714	0.0204082	0.118179	1	3333	tags=30%, list=17%, signal=37%
GO_UBIQUITIN_DEPENDENT_ERAD_PATHWAY	77	0.284909	1.33325	0.0204082	0.192284	1	3348	tags=32%, list=18%, signal=39%
GO_FLEMMING_BODY	31	0.409444	1.57065	0.0205479	0.0812709	1	5030	tags=58%, list=26%, signal=79%
GO_ERROR_PRONE_TRANSLESION_SYNTHESIS	21	0.505453	1.69275	0.0206186	0.0491772	1	4417	tags=52%, list=23%, signal=68%
GO_CERAMIDE_CATABOLIC_PROCESS	21	0.472322	1.57632	0.0206186	0.0790632	1	2483	tags=33%, list=13%, signal=38%
GO_DNA_POLYMERASE_COMPLEX	21	0.483938	1.63104	0.0208333	0.0643101	1	2995	tags=43%, list=16%, signal=51%
GO_VESICLE_DOCKING_INVOLVED_IN_EXOCYTOSIS	44	0.345674	1.46493	0.0212766	0.122914	1	3041	tags=32%, list=16%, signal=38%
GO_PROTEIN_QUALITY_CONTROL_FOR_MISFOLDED_OR_INCOMPLETELY_SYNTHESIZED_PROTEINS	29	0.384734	1.40979	0.0215827	0.14744	1	4203	tags=41%, list=22%, signal=53%
GO_GOLGI_ASSOCIATED_VESICLE_MEMBRANE	93	0.274476	1.29161	0.0222222	0.2199	1	3976	tags=37%, list=21%, signal=46%
GO_REGULATION_OF_SPINDLE_ORGANIZATION	38	0.391523	1.52675	0.0232558	0.0964186	1	3336	tags=39%, list=18%, signal=48%
GO_DYNEIN_COMPLEX	47	0.348162	1.45798	0.0232558	0.125049	1	6203	tags=55%, list=33%, signal=82%
GO_NON_MOTILE_CILIUM_ASSEMBLY	56	0.312498	1.36678	0.0232558	0.171801	1	3185	tags=29%, list=17%, signal=34%
GO_PYROPHOSPHATE_HYDROLYSIS_DRIVEN_PROTON_TRANSMEMBRANE_TRANSPORTER_ACTIVITY	31	0.440326	1.67404	0.0233918	0.0538538	1	2923	tags=29%, list=15%, signal=34%
GO_CLATHRIN_ADAPTOR_COMPLEX	25	0.455967	1.64997	0.0235294	0.0588971	1	2644	tags=32%, list=14%, signal=37%
GO_PROTEIN_TARGETING_TO_LYSOSOME	21	0.444054	1.52935	0.0242718	0.0954571	1	4396	tags=52%, list=23%, signal=68%
GO_MODIFIED_AMINO_ACID_TRANSMEMBRANE_TRANSPORTER_ACTIVITY	20	0.467859	1.53556	0.0243902	0.0931575	1	2297	tags=35%, list=12%, signal=40%
GO_NUCLEAR_LOCALIZATION_SEQUENCE_BINDING	26	0.420011	1.5516	0.0245399	0.0867068	1	4836	tags=54%, list=25%, signal=72%
GO_TRANSCRIPTION_ELONGATION_FROM_RNA_POLYMERASE_I_PROMOTER	27	0.430597	1.55407	0.0248447	0.0860875	1	1784	tags=30%, list=9%, signal=33%
GO_MICROTUBULE_ANCHORING	26	0.43568	1.58167	0.0251572	0.0771692	1	3809	tags=42%, list=20%, signal=53%
GO_CLATHRIN_VESICLE_COAT	29	0.423358	1.55946	0.025641	0.0850965	1	2644	tags=31%, list=14%, signal=36%
GO_TRNA_MODIFICATION	88	0.286524	1.39063	0.025641	0.157413	1	2478	tags=24%, list=13%, signal=27%
GO_INTRINSIC_COMPONENT_OF_MITOCHONDRIAL_INNER_MEMBRANE	48	0.350807	1.5363	0.0263158	0.0929082	1	4760	tags=48%, list=25%, signal=64%
GO_ENDOPLASMIC_RETICULUM_TUBULAR_NETWORK	22	0.463827	1.6098	0.026455	0.0693537	1	4555	tags=50%, list=24%, signal=66%
GO_REPLISOME	26	0.465061	1.66869	0.0271739	0.0545438	1	3468	tags=42%, list=18%, signal=52%
GO_DIOL_BIOSYNTHETIC_PROCESS	21	0.455142	1.56394	0.0271739	0.0836875	1	2486	tags=43%, list=13%, signal=49%
GO_DNA_METHYLATION	68	0.300124	1.40469	0.0273973	0.149491	1	3360	tags=32%, list=18%, signal=39%
GO_ENDOPLASMIC_RETICULUM_QUALITY_CONTROL_COMPARTMENT	23	0.460352	1.61279	0.0274725	0.0682278	1	3021	tags=43%, list=16%, signal=52%
GO_REGULATION_OF_DNA_RECOMBINATION	97	0.310145	1.55182	0.0294118	0.0867573	1	2463	tags=34%, list=13%, signal=39%
GO_REGULATION_OF_DNA_TEMPLATED_TRANSCRIPTION_INITIATION	44	0.31824	1.37473	0.0294118	0.167363	1	2292	tags=27%, list=12%, signal=31%
GO_REGULATION_OF_CELLULAR_AMINO_ACID_METABOLIC_PROCESS	62	0.27937	1.32225	0.0298507	0.200105	1	3390	tags=24%, list=18%, signal=29%
GO_NEGATIVE_REGULATION_OF_INTRINSIC_APOPTOTIC_SIGNALING_PATHWAY_BY_P53_CLASS_MEDIATOR	22	0.447349	1.56194	0.03	0.084473	1	1981	tags=32%, list=10%, signal=35%
GO_POLYOL_CATABOLIC_PROCESS	26	0.424631	1.55318	0.030303	0.0863099	1	1976	tags=31%, list=10%, signal=34%
GO_ER_TO_GOLGI_TRANSPORT_VESICLE_MEMBRANE	43	0.367587	1.48849	0.0306122	0.112996	1	2263	tags=35%, list=12%, signal=39%
GO_NCRNA_3_END_PROCESSING	47	0.318407	1.35742	0.0306122	0.176432	1	1323	tags=15%, list=7%, signal=16%
GO_TRNA_METHYLTRANSFERASE_ACTIVITY	34	0.385792	1.555	0.03125	0.0862868	1	3803	tags=41%, list=20%, signal=51%
GO_POSITIVE_REGULATION_OF_ORGANELLE_ASSEMBLY	71	0.284331	1.3073	0.0327869	0.210058	1	3667	tags=37%, list=19%, signal=45%
GO_LIGASE_ACTIVITY_FORMING_CARBON_NITROGEN_BONDS	48	0.328663	1.40963	0.0333333	0.147357	1	2171	tags=27%, list=11%, signal=30%
GO_BITTER_TASTE_RECEPTOR_ACTIVITY	20	0.460793	1.55544	0.0341463	0.0862195	1	5454	tags=60%, list=29%, signal=84%
GO_N_METHYLTRANSFERASE_ACTIVITY	96	0.260266	1.28666	0.0344828	0.222732	1	2981	tags=29%, list=16%, signal=34%
GO_CELLULAR_CARBOHYDRATE_CATABOLIC_PROCESS	45	0.341069	1.42689	0.0350877	0.139554	1	673	tags=13%, list=4%, signal=14%
GO_TRANSLATION_REPRESSOR_ACTIVITY	25	0.391777	1.47338	0.0352941	0.119462	1	4950	tags=60%, list=26%, signal=81%
GO_4_IRON_4_SULFUR_CLUSTER_BINDING	42	0.347005	1.39087	0.0366972	0.157359	1	2125	tags=24%, list=11%, signal=27%
GO_PH_REDUCTION	58	0.303929	1.33253	0.037037	0.192637	1	4020	tags=33%, list=21%, signal=41%
GO_REGULATION_OF_TRANSLATIONAL_INITIATION	77	0.275711	1.31896	0.037037	0.202481	1	2999	tags=31%, list=16%, signal=37%
GO_CUL4_RING_E3_UBIQUITIN_LIGASE_COMPLEX	35	0.361664	1.45803	0.0373134	0.125191	1	5253	tags=54%, list=28%, signal=75%
GO_NUCLEOBASE_CONTAINING_SMALL_MOLECULE_INTERCONVERSION	27	0.410818	1.52647	0.0375	0.0964131	1	3414	tags=41%, list=18%, signal=50%
GO_URONIC_ACID_METABOLIC_PROCESS	23	0.407693	1.46532	0.0375	0.122855	1	435	tags=9%, list=2%, signal=9%
GO_REGULATION_OF_HISTONE_H3_K9_METHYLATION	22	0.42583	1.46376	0.0376344	0.122994	1	2891	tags=45%, list=15%, signal=54%
GO_TRANSLATION_REGULATOR_ACTIVITY_NUCLEIC_ACID_BINDING	105	0.331013	1.58929	0.0384615	0.0746081	1	4045	tags=38%, list=21%, signal=48%
GO_ATPASE_ACTIVITY_COUPLED_TO_TRANSMEMBRANE_MOVEMENT_OF_IONS_ROTATIONAL_MECHANISM	20	0.460822	1.5468	0.038674	0.0884382	1	3594	tags=35%, list=19%, signal=43%
GO_GENERAL_TRANSCRIPTION_INITIATION_FACTOR_BINDING	44	0.329754	1.3823	0.0392157	0.162532	1	3017	tags=32%, list=16%, signal=38%
GO_SIGNAL_TRANSDUCTION_INVOLVED_IN_CELL_CYCLE_CHECKPOINT	72	0.299628	1.36508	0.0392157	0.172843	1	3620	tags=40%, list=19%, signal=50%
GO_NLS_BEARING_PROTEIN_IMPORT_INTO_NUCLEUS	20	0.452128	1.54319	0.0393013	0.0902174	1	6799	tags=60%, list=36%, signal=93%
GO_MIRNA_METABOLIC_PROCESS	30	0.381821	1.49393	0.0394737	0.110609	1	3915	tags=43%, list=21%, signal=54%
GO_THIOESTER_BIOSYNTHETIC_PROCESS	53	0.305633	1.36417	0.0394737	0.173099	1	2141	tags=25%, list=11%, signal=28%
GO_NEGATIVE_REGULATION_OF_TELOMERE_MAINTENANCE_VIA_TELOMERASE	20	0.436834	1.50914	0.039604	0.103763	1	3586	tags=35%, list=19%, signal=43%
GO_PROTEIN_TARGETING_TO_VACUOLE	39	0.358872	1.41784	0.0396825	0.143121	1	4498	tags=46%, list=24%, signal=60%
GO_SCF_DEPENDENT_PROTEASOMAL_UBIQUITIN_DEPENDENT_PROTEIN_CATABOLIC_PROCESS	92	0.265884	1.2882	0.04	0.222358	1	3096	tags=28%, list=16%, signal=34%
GO_POSITIVE_REGULATION_OF_RESPONSE_TO_DNA_DAMAGE_STIMULUS	104	0.242866	1.19691	0.0434783	0.298628	1	3252	tags=30%, list=17%, signal=36%
GO_TELOMERASE_HOLOENZYME_COMPLEX	20	0.454746	1.49953	0.0439024	0.108215	1	6355	tags=60%, list=33%, signal=90%
GO_VESICLE_TRANSPORT_ALONG_MICROTUBULE	49	0.333375	1.43029	0.0444444	0.137959	1	3238	tags=33%, list=17%, signal=39%
GO_PERICENTRIC_HETEROCHROMATIN	20	0.441686	1.53492	0.045	0.0933703	1	3420	tags=55%, list=18%, signal=67%
GO_DNA_DAMAGE_RESPONSE_DETECTION_OF_DNA_DAMAGE	37	0.356348	1.40229	0.0451128	0.150422	1	4372	tags=41%, list=23%, signal=53%
GO_DICARBOXYLIC_ACID_TRANSMEMBRANE_TRANSPORTER_ACTIVITY	38	0.331056	1.33742	0.0454545	0.189901	1	1993	tags=26%, list=10%, signal=29%
GO_REGULATION_OF_HISTONE_H3_K4_METHYLATION	29	0.369869	1.36137	0.0457516	0.174025	1	3420	tags=34%, list=18%, signal=42%
GO_REGULATION_OF_TRANSCRIPTION_BY_RNA_POLYMERASE_III	23	0.402976	1.43002	0.0467836	0.13797	1	3299	tags=48%, list=17%, signal=58%
GO_HOST_CELLULAR_COMPONENT	65	0.287518	1.32539	0.046875	0.197582	1	3853	tags=40%, list=20%, signal=50%
GO_P53_BINDING	66	0.263496	1.25145	0.046875	0.248821	1	2933	tags=36%, list=15%, signal=43%
GO_SAGA_TYPE_COMPLEX	28	0.369006	1.40418	0.0470588	0.149329	1	3363	tags=29%, list=18%, signal=35%
GO_TBP_CLASS_PROTEIN_BINDING	26	0.374543	1.34761	0.0479042	0.182557	1	2699	tags=31%, list=14%, signal=36%
GO_KINESIN_BINDING	43	0.327667	1.33302	0.0480769	0.19234	1	2876	tags=42%, list=15%, signal=49%
GO_NUCLEAR_ENVELOPE_ORGANIZATION	52	0.289537	1.24881	0.0493827	0.251041	1	2912	tags=23%, list=15%, signal=27%
Low-Cusig score group
NAME	SIZE	ES	NES	NOM p-val	FDR q-val	FWER p-val	RANK AT MAX	LEADING EDGE
GO_B_CELL_RECEPTOR_SIGNALING_PATHWAY	76	-0.73699	-2.38453	0	0	0	4242	tags=82%, list=22%, signal=105%
GO_COMPLEMENT_ACTIVATION	85	-0.690145	-2.2606	0	0	0	4379	tags=65%, list=23%, signal=84%
GO_T_CELL_RECEPTOR_COMPLEX	70	-0.704715	-2.23862	0	0	0	3921	tags=76%, list=21%, signal=95%
GO_ANTIGEN_BINDING	63	-0.70472	-2.21966	0	0	0	2504	tags=56%, list=13%, signal=64%
GO_IMMUNOGLOBULIN_RECEPTOR_BINDING	24	-0.817268	-2.21626	0	0	0	2369	tags=79%, list=12%, signal=90%
GO_HUMORAL_IMMUNE_RESPONSE_MEDIATED_BY_CIRCULATING_IMMUNOGLOBULIN	62	-0.706723	-2.20669	0	0	0	4379	tags=71%, list=23%, signal=92%
GO_LYMPHOCYTE_MIGRATION	112	-0.667136	-2.18699	0	0	0	3329	tags=56%, list=17%, signal=68%
GO_CYTOKINE_RECEPTOR_ACTIVITY	97	-0.665847	-2.18094	0	0	0	4652	tags=69%, list=24%, signal=91%
GO_IMMUNE_RECEPTOR_ACTIVITY	121	-0.650365	-2.17633	0	0	0	4727	tags=67%, list=25%, signal=88%
GO_IMMUNOGLOBULIN_COMPLEX	25	-0.792391	-2.16115	0	0	0	2369	tags=80%, list=12%, signal=91%
GO_T_CELL_SELECTION	49	-0.704393	-2.16022	0	0	0	3921	tags=71%, list=21%, signal=90%
GO_CYTOKINE_BINDING	135	-0.645354	-2.15953	0	0	0	4039	tags=57%, list=21%, signal=72%
GO_POSITIVE_REGULATION_OF_LEUKOCYTE_CELL_CELL_ADHESION	223	-0.62475	-2.15612	0	0	0	4391	tags=61%, list=23%, signal=78%
GO_ADAPTIVE_IMMUNE_RESPONSE	466	-0.615821	-2.15271	0	0	0	4391	tags=58%, list=23%, signal=74%
GO_EXTERNAL_SIDE_OF_PLASMA_MEMBRANE	352	-0.618915	-2.13642	0	0	0	4090	tags=54%, list=21%, signal=68%
GO_RESPONSE_TO_CHEMOKINE	95	-0.648914	-2.13639	0	0	0	4214	tags=61%, list=22%, signal=78%
GO_REGULATION_OF_HUMORAL_IMMUNE_RESPONSE	79	-0.670923	-2.13264	0	0	0	4379	tags=59%, list=23%, signal=77%
GO_POSITIVE_T_CELL_SELECTION	36	-0.723839	-2.13222	0	0	0	3208	tags=69%, list=17%, signal=83%
GO_NEGATIVE_REGULATION_OF_TUMOR_NECROSIS_FACTOR_SUPERFAMILY_CYTOKINE_PRODUCTION	62	-0.684314	-2.12781	0	0	0	4727	tags=69%, list=25%, signal=92%
GO_MONOCYTE_CHEMOTAXIS	64	-0.678203	-2.12133	0	8.02662e-06	0.001	2322	tags=45%, list=12%, signal=51%
GO_REGULATION_OF_LEUKOCYTE_MIGRATION	207	-0.619992	-2.11866	0	7.95017e-06	0.001	4481	tags=58%, list=24%, signal=76%
GO_LEUKOCYTE_CHEMOTAXIS	224	-0.616047	-2.11826	0	7.87517e-06	0.001	4338	tags=56%, list=23%, signal=72%
GO_LYMPHOCYTE_CHEMOTAXIS	60	-0.680122	-2.10273	0	1.56533e-05	0.002	2957	tags=53%, list=16%, signal=63%
GO_POSITIVE_REGULATION_OF_T_CELL_PROLIFERATION	94	-0.644485	-2.10248	0	1.55084e-05	0.002	4481	tags=66%, list=24%, signal=86%
GO_INTERLEUKIN_1_PRODUCTION	101	-0.63564	-2.09806	0	1.53661e-05	0.002	5227	tags=65%, list=27%, signal=90%
GO_NEGATIVE_REGULATION_OF_LEUKOCYTE_MIGRATION	45	-0.694437	-2.09758	0	1.52264e-05	0.002	3314	tags=62%, list=17%, signal=75%
GO_POSITIVE_REGULATION_OF_CELL_ACTIVATION	348	-0.600458	-2.09375	0	1.49545e-05	0.002	4285	tags=58%, list=22%, signal=73%
GO_POSITIVE_REGULATION_OF_VASCULATURE_DEVELOPMENT	185	-0.614386	-2.09317	0	1.48221e-05	0.002	3749	tags=50%, list=20%, signal=61%
GO_LEUKOCYTE_CELL_CELL_ADHESION	340	-0.602326	-2.08941	0	1.46921e-05	0.002	4311	tags=56%, list=23%, signal=71%
GO_HUMORAL_IMMUNE_RESPONSE	278	-0.606195	-2.088	0	2.18515e-05	0.003	4308	tags=48%, list=23%, signal=61%
GO_POSITIVE_REGULATION_OF_CELL_CELL_ADHESION	267	-0.604152	-2.08744	0	2.16632e-05	0.003	4285	tags=55%, list=22%, signal=70%
GO_REGULATION_OF_VASCULATURE_DEVELOPMENT	330	-0.602896	-2.08632	0	2.1478e-05	0.003	3886	tags=48%, list=20%, signal=60%
GO_NEGATIVE_REGULATION_OF_CELL_ACTIVATION	197	-0.60987	-2.08297	0	2.1296e-05	0.003	4052	tags=53%, list=21%, signal=67%
GO_REGULATION_OF_LEUKOCYTE_ADHESION_TO_VASCULAR_ENDOTHELIAL_CELL	26	-0.753799	-2.07915	0	2.81261e-05	0.004	2412	tags=62%, list=13%, signal=70%
GO_ADAPTIVE_IMMUNE_RESPONSE_BASED_ON_SOMATIC_RECOMBINATION_OF_IMMUNE_RECEPTORS_BUILT_FROM_IMMUNOGLOBULIN_SUPERFAMILY_DOMAINS	268	-0.603283	-2.0769	0	2.78917e-05	0.004	4032	tags=55%, list=21%, signal=69%
GO_MYELOID_LEUKOCYTE_MIGRATION	214	-0.609014	-2.07357	0	2.76612e-05	0.004	4874	tags=59%, list=26%, signal=79%
GO_CORECEPTOR_ACTIVITY	47	-0.679454	-2.0732	0	2.74344e-05	0.004	3730	tags=60%, list=20%, signal=74%
GO_GRANULOCYTE_CHEMOTAXIS	123	-0.621349	-2.07287	0	2.72114e-05	0.004	4338	tags=59%, list=23%, signal=76%
GO_POSITIVE_REGULATION_OF_LYMPHOCYTE_ACTIVATION	290	-0.595808	-2.07116	0	2.6992e-05	0.004	4285	tags=58%, list=22%, signal=73%
GO_CYTOKINE_SECRETION	116	-0.610649	-2.06644	0	4.67985e-05	0.007	3997	tags=50%, list=21%, signal=63%
GO_NEUTROPHIL_CHEMOTAXIS	99	-0.632512	-2.06643	0	4.6427e-05	0.007	4214	tags=61%, list=22%, signal=77%
GO_PHAGOCYTOSIS_RECOGNITION	32	-0.727231	-2.06432	0	4.60615e-05	0.007	3829	tags=75%, list=20%, signal=94%
GO_CELLULAR_EXTRAVASATION	67	-0.649975	-2.06367	0	4.57016e-05	0.007	4480	tags=63%, list=24%, signal=82%
GO_REGULATION_OF_ANTIGEN_RECEPTOR_MEDIATED_SIGNALING_PATHWAY	66	-0.655181	-2.06221	0	4.53473e-05	0.007	3910	tags=62%, list=21%, signal=78%
GO_TRANSFORMING_GROWTH_FACTOR_BETA_BINDING	23	-0.768978	-2.06052	0	5.14458e-05	0.008	1947	tags=48%, list=10%, signal=53%
GO_LEUKOCYTE_MIGRATION	452	-0.593407	-2.06048	0	5.1053e-05	0.008	4482	tags=52%, list=24%, signal=67%
GO_POSITIVE_REGULATION_OF_LEUKOCYTE_PROLIFERATION	141	-0.614892	-2.05967	0	5.06663e-05	0.008	4534	tags=63%, list=24%, signal=82%
GO_MONONUCLEAR_CELL_MIGRATION	94	-0.633291	-2.05665	0	5.65863e-05	0.009	4284	tags=53%, list=22%, signal=68%
GO_CELL_CHEMOTAXIS	295	-0.59927	-2.05111	0	6.86553e-05	0.011	4284	tags=52%, list=22%, signal=66%
GO_NEGATIVE_REGULATION_OF_LEUKOCYTE_APOPTOTIC_PROCESS	48	-0.670592	-2.04988	0	7.43813e-05	0.012	3992	tags=60%, list=21%, signal=76%
GO_REGULATION_OF_LYMPHOCYTE_MIGRATION	63	-0.64482	-2.04867	0	7.38344e-05	0.012	4148	tags=62%, list=22%, signal=79%
GO_REGULATION_OF_LEUKOCYTE_PROLIFERATION	228	-0.595161	-2.04751	0	7.32954e-05	0.012	4391	tags=57%, list=23%, signal=73%
GO_POSITIVE_REGULATION_OF_LEUKOCYTE_MIGRATION	142	-0.609598	-2.04674	0	7.27643e-05	0.012	4481	tags=58%, list=24%, signal=75%
GO_REGULATION_OF_EXTRACELLULAR_MATRIX_ORGANIZATION	41	-0.68806	-2.04499	0	7.22408e-05	0.012	3466	tags=59%, list=18%, signal=71%
GO_T_CELL_DIFFERENTIATION	247	-0.595853	-2.04466	0	7.17248e-05	0.012	3967	tags=51%, list=21%, signal=64%
GO_LYMPHOCYTE_MEDIATED_IMMUNITY	264	-0.590338	-2.04424	0	7.71513e-05	0.013	4495	tags=56%, list=24%, signal=73%
GO_ALPHA_BETA_T_CELL_ACTIVATION	142	-0.607633	-2.04017	0	8.77963e-05	0.015	3776	tags=53%, list=20%, signal=65%
GO_EXTRACELLULAR_MATRIX_STRUCTURAL_CONSTITUENT	169	-0.601079	-2.04009	0	8.71866e-05	0.015	4154	tags=47%, list=22%, signal=60%
GO_REGULATION_OF_LEUKOCYTE_MEDIATED_CYTOTOXICITY	68	-0.635887	-2.03877	0	8.65853e-05	0.015	4765	tags=66%, list=25%, signal=88%
GO_NEGATIVE_REGULATION_OF_LYMPHOCYTE_ACTIVATION	147	-0.602065	-2.03631	0	9.75054e-05	0.017	4052	tags=53%, list=21%, signal=67%
GO_CHEMOKINE_ACTIVITY	47	-0.670635	-2.03615	0	9.68421e-05	0.017	4978	tags=72%, list=26%, signal=98%
GO_CCR_CHEMOKINE_RECEPTOR_BINDING	42	-0.687818	-2.03519	0	9.61878e-05	0.017	2283	tags=43%, list=12%, signal=49%
GO_REGULATION_OF_CELL_KILLING	85	-0.627305	-2.03451	0	9.55422e-05	0.017	4765	tags=65%, list=25%, signal=86%
GO_TUMOR_NECROSIS_FACTOR_SUPERFAMILY_CYTOKINE_PRODUCTION	160	-0.601736	-2.03331	0	9.49053e-05	0.017	4727	tags=56%, list=25%, signal=74%
GO_REGULATION_OF_CELL_CELL_ADHESION	416	-0.58453	-2.03076	0	9.42768e-05	0.017	4296	tags=52%, list=23%, signal=66%
GO_LYMPHOCYTE_COSTIMULATION	57	-0.64636	-2.03061	0	9.36565e-05	0.017	4285	tags=65%, list=22%, signal=84%
GO_EXTRACELLULAR_MATRIX_ASSEMBLY	42	-0.686449	-2.03015	0	9.30444e-05	0.017	2615	tags=48%, list=14%, signal=55%
GO_NEGATIVE_REGULATION_OF_VASCULATURE_DEVELOPMENT	128	-0.609956	-2.02994	0	9.78736e-05	0.018	3859	tags=49%, list=20%, signal=61%
GO_T_CELL_ACTIVATION	467	-0.580863	-2.02811	0	9.72421e-05	0.018	4052	tags=49%, list=21%, signal=61%
GO_REGULATION_OF_LEUKOCYTE_APOPTOTIC_PROCESS	85	-0.62979	-2.02786	0	9.66188e-05	0.018	3992	tags=56%, list=21%, signal=71%
GO_REGULATION_OF_LEUKOCYTE_CHEMOTAXIS	121	-0.610921	-2.02476	0	9.60034e-05	0.018	4832	tags=61%, list=25%, signal=81%
GO_GRANULOCYTE_MIGRATION	146	-0.603687	-2.02127	0	9.53958e-05	0.018	4874	tags=60%, list=26%, signal=80%
GO_REGULATION_OF_LYMPHOCYTE_ACTIVATION	442	-0.578578	-2.01969	0	9.47958e-05	0.018	4052	tags=52%, list=21%, signal=64%
GO_T_CELL_MIGRATION	66	-0.637495	-2.01839	0	9.94308e-05	0.019	4148	tags=61%, list=22%, signal=77%
GO_REGULATION_OF_T_CELL_ACTIVATION	317	-0.583542	-2.01387	0	0.000104005	0.02	4052	tags=51%, list=21%, signal=64%
GO_POSITIVE_REGULATION_OF_CELL_ADHESION	414	-0.575897	-2.0138	0	0.000103363	0.02	4391	tags=51%, list=23%, signal=65%
GO_NEUTROPHIL_MIGRATION	118	-0.611597	-2.0137	0	0.000102728	0.02	4874	tags=62%, list=26%, signal=83%
GO_COLLAGEN_CONTAINING_EXTRACELLULAR_MATRIX	425	-0.576653	-2.01266	0	0.000102102	0.02	4154	tags=46%, list=22%, signal=58%
GO_LEUKOCYTE_ADHESION_TO_VASCULAR_ENDOTHELIAL_CELL	42	-0.687376	-2.0092	0	0.000116668	0.023	4480	tags=69%, list=24%, signal=90%
GO_NEGATIVE_REGULATION_OF_INFLAMMATORY_RESPONSE	142	-0.606118	-2.00673	0	0.000126043	0.025	4832	tags=61%, list=25%, signal=81%
GO_NEGATIVE_REGULATION_OF_IMMUNE_RESPONSE	143	-0.597373	-2.00453	0	0.000125288	0.025	4502	tags=55%, list=24%, signal=71%
GO_INTERLEUKIN_1_BETA_PRODUCTION	88	-0.626768	-2.00435	0	0.000124543	0.025	5227	tags=66%, list=27%, signal=90%
GO_INTEGRIN_BINDING	143	-0.5935	-2.00284	0	0.000123806	0.025	4515	tags=57%, list=24%, signal=74%
GO_CD4_POSITIVE_ALPHA_BETA_T_CELL_ACTIVATION	95	-0.611794	-2.0025	0	0.000123077	0.025	3776	tags=53%, list=20%, signal=65%
GO_NEGATIVE_REGULATION_OF_DEFENSE_RESPONSE	207	-0.586641	-2.00235	0	0.000122358	0.025	4832	tags=56%, list=25%, signal=74%
GO_ALPHA_BETA_T_CELL_DIFFERENTIATION	104	-0.611253	-2.00127	0	0.000126538	0.026	3580	tags=52%, list=19%, signal=64%
GO_REGULATION_OF_PHOSPHOLIPASE_ACTIVITY	73	-0.627748	-2.00044	0	0.000130664	0.027	4001	tags=52%, list=21%, signal=66%
GO_LEUKOCYTE_MEDIATED_CYTOTOXICITY	100	-0.616083	-1.99906	0	0.000144351	0.03	4880	tags=62%, list=26%, signal=83%
GO_CHEMOKINE_BINDING	33	-0.696221	-1.99885	0	0.000143526	0.03	3730	tags=58%, list=20%, signal=71%
GO_REGULATION_OF_SMOOTH_MUSCLE_CONTRACTION	60	-0.637932	-1.99885	0	0.000142711	0.03	3545	tags=50%, list=19%, signal=61%
GO_LEUKOCYTE_APOPTOTIC_PROCESS	107	-0.605992	-1.99657	0	0.000146635	0.031	4158	tags=54%, list=22%, signal=69%
GO_CELLULAR_RESPONSE_TO_MOLECULE_OF_BACTERIAL_ORIGIN	204	-0.583414	-1.99468	0	0.000155219	0.033	4978	tags=58%, list=26%, signal=77%
GO_POSITIVE_REGULATION_OF_CHEMOTAXIS	144	-0.593575	-1.9945	0	0.000154352	0.033	4481	tags=53%, list=24%, signal=69%
GO_BLOOD_VESSEL_ENDOTHELIAL_CELL_MIGRATION	116	-0.597786	-1.9932	0	0.000162746	0.034	3859	tags=48%, list=20%, signal=60%
GO_T_HELPER_1_TYPE_IMMUNE_RESPONSE	43	-0.668193	-1.9912	0	0.000161847	0.034	3580	tags=63%, list=19%, signal=77%
GO_NEUROINFLAMMATORY_RESPONSE	67	-0.629957	-1.98968	0	0.000165556	0.035	4284	tags=58%, list=22%, signal=75%
GO_ACTIVATION_OF_PHOSPHOLIPASE_C_ACTIVITY	34	-0.686867	-1.9887	0	0.000164651	0.035	4001	tags=62%, list=21%, signal=78%
GO_REGULATION_OF_B_CELL_ACTIVATION	137	-0.597428	-1.98552	0	0.000190041	0.041	4285	tags=62%, list=22%, signal=79%
GO_POSITIVE_REGULATION_OF_INFLAMMATORY_RESPONSE	143	-0.589784	-1.98476	0	0.000193518	0.042	5227	tags=64%, list=27%, signal=88%
GO_CD4_POSITIVE_ALPHA_BETA_T_CELL_DIFFERENTIATION	76	-0.619041	-1.98453	0	0.000192483	0.042	3580	tags=54%, list=19%, signal=66%
GO_T_CELL_PROLIFERATION	185	-0.587126	-1.98361	0	0.000195899	0.043	4391	tags=55%, list=23%, signal=70%
GO_REGULATION_OF_T_CELL_APOPTOTIC_PROCESS	34	-0.692214	-1.98344	0	0.000194863	0.043	3820	tags=62%, list=20%, signal=77%
GO_REGULATION_OF_PHOSPHOLIPASE_C_ACTIVITY	48	-0.648761	-1.9778	0	0.000211492	0.047	4001	tags=56%, list=21%, signal=71%
GO_HEPARIN_BINDING	168	-0.585412	-1.97654	0	0.000219175	0.049	3925	tags=42%, list=21%, signal=53%
GO_ENDOTHELIAL_CELL_MIGRATION	208	-0.575181	-1.97511	0	0.000216904	0.049	3886	tags=46%, list=20%, signal=57%
GO_CHEMOKINE_PRODUCTION	89	-0.608654	-1.97443	0	0.000215785	0.049	3934	tags=54%, list=21%, signal=68%
GO_REGULATION_OF_MYOBLAST_DIFFERENTIATION	53	-0.649784	-1.97336	0	0.00021899	0.05	3957	tags=57%, list=21%, signal=71%
GO_THYMIC_T_CELL_SELECTION	22	-0.722616	-1.97283	0	0.000217873	0.05	3190	tags=73%, list=17%, signal=87%
GO_REGULATION_OF_ALPHA_BETA_T_CELL_ACTIVATION	94	-0.599736	-1.97236	0	0.000221014	0.051	3921	tags=55%, list=21%, signal=69%
GO_LEUKOCYTE_PROLIFERATION	301	-0.572981	-1.97117	0	0.000219898	0.051	4285	tags=52%, list=22%, signal=66%
GO_REGULATION_OF_INFLAMMATORY_RESPONSE	357	-0.569786	-1.97101	0	0.000223012	0.052	4356	tags=52%, list=23%, signal=66%
GO_LYMPHOCYTE_DIFFERENTIATION	361	-0.56855	-1.97064	0	0.000226085	0.053	3967	tags=47%, list=21%, signal=59%
GO_MACROPHAGE_ACTIVATION	95	-0.604849	-1.9687	0	0.000224961	0.053	4641	tags=57%, list=24%, signal=75%
GO_GROWTH_FACTOR_BINDING	136	-0.581915	-1.96783	0	0.000232138	0.055	4100	tags=47%, list=22%, signal=60%
GO_TOLERANCE_INDUCTION	23	-0.717328	-1.96771	0	0.000230994	0.055	4039	tags=70%, list=21%, signal=88%
GO_REGULATION_OF_T_HELPER_1_TYPE_IMMUNE_RESPONSE	27	-0.71829	-1.96701	0	0.000233963	0.056	3580	tags=70%, list=19%, signal=87%
GO_REGULATION_OF_B_CELL_RECEPTOR_SIGNALING_PATHWAY	26	-0.717994	-1.96686	0	0.0002369	0.057	4242	tags=77%, list=22%, signal=99%
GO_ANTIGEN_RECEPTOR_MEDIATED_SIGNALING_PATHWAY	249	-0.572081	-1.96653	0	0.000239827	0.058	4013	tags=49%, list=21%, signal=61%
GO_NEGATIVE_REGULATION_OF_CELL_CELL_ADHESION	177	-0.577805	-1.96604	0	0.000242735	0.059	4284	tags=53%, list=22%, signal=67%
GO_POSITIVE_REGULATION_OF_SMOOTH_MUSCLE_CONTRACTION	30	-0.685666	-1.96511	0	0.000245552	0.06	3324	tags=60%, list=17%, signal=73%
GO_B_CELL_MEDIATED_IMMUNITY	134	-0.588028	-1.96229	0	0.000263183	0.065	4391	tags=58%, list=23%, signal=75%
GO_RESPONSE_TO_MOLECULE_OF_BACTERIAL_ORIGIN	336	-0.567762	-1.96139	0	0.000269897	0.067	4978	tags=55%, list=26%, signal=73%
GO_NEGATIVE_REGULATION_OF_LEUKOCYTE_CELL_CELL_ADHESION	123	-0.593584	-1.96066	0	0.000268624	0.067	4284	tags=54%, list=22%, signal=70%
GO_CYTOKINE_ACTIVITY	231	-0.573366	-1.95835	0	0.000283068	0.071	4630	tags=49%, list=24%, signal=64%
GO_POSITIVE_REGULATION_OF_ERK1_AND_ERK2_CASCADE	201	-0.57431	-1.95734	0	0.000313056	0.078	4541	tags=49%, list=24%, signal=64%
GO_INTERLEUKIN_6_PRODUCTION	137	-0.582438	-1.95689	0	0.000315482	0.078	3997	tags=53%, list=21%, signal=66%
GO_REGULATION_OF_COAGULATION	86	-0.605941	-1.95675	0	0.000314021	0.078	4350	tags=49%, list=23%, signal=63%
GO_POSITIVE_REGULATION_OF_GLIOGENESIS	68	-0.612225	-1.95631	0	0.000316442	0.079	4157	tags=53%, list=22%, signal=67%
GO_T_CELL_MEDIATED_IMMUNITY	96	-0.599913	-1.95607	0	0.000314991	0.079	4481	tags=56%, list=24%, signal=73%
GO_LEUKOCYTE_TETHERING_OR_ROLLING	29	-0.694569	-1.95591	0	0.000313552	0.079	4480	tags=72%, list=24%, signal=95%
GO_INTERFERON_GAMMA_PRODUCTION	108	-0.60317	-1.95515	0	0.000331113	0.083	3949	tags=53%, list=21%, signal=66%
GO_GLIAL_CELL_ACTIVATION	54	-0.626212	-1.95513	0	0.000329615	0.083	4482	tags=61%, list=24%, signal=80%
GO_REGULATION_OF_CELLULAR_EXTRAVASATION	33	-0.684891	-1.95454	0	0.00032813	0.083	5374	tags=85%, list=28%, signal=118%
GO_MEMBRANE_INVAGINATION	87	-0.604848	-1.95288	0	0.000349196	0.089	4482	tags=55%, list=24%, signal=72%
GO_POSITIVE_REGULATION_OF_LYMPHOCYTE_DIFFERENTIATION	102	-0.599961	-1.95245	0	0.000347637	0.089	4039	tags=56%, list=21%, signal=71%
GO_GLYCOSAMINOGLYCAN_BINDING	230	-0.574885	-1.95163	0	0.000351979	0.091	4082	tags=44%, list=21%, signal=56%
GO_CYTOLYSIS	29	-0.699724	-1.95062	0	0.000368866	0.096	3438	tags=52%, list=18%, signal=63%
GO_INTERLEUKIN_10_PRODUCTION	56	-0.622822	-1.95057	0	0.000367248	0.096	4971	tags=73%, list=26%, signal=99%
GO_POSITIVE_REGULATION_OF_T_HELPER_1_TYPE_IMMUNE_RESPONSE	20	-0.746195	-1.9504	0	0.000367715	0.097	2874	tags=70%, list=15%, signal=82%
GO_REGULATION_OF_IMMUNE_EFFECTOR_PROCESS	403	-0.559541	-1.94922	0	0.000384273	0.1	4068	tags=47%, list=21%, signal=59%
GO_INTERLEUKIN_8_PRODUCTION	82	-0.603565	-1.94806	0	0.000391779	0.103	3992	tags=51%, list=21%, signal=65%
GO_POSITIVE_REGULATION_OF_B_CELL_ACTIVATION	94	-0.591765	-1.94579	0	0.000420545	0.112	4285	tags=63%, list=22%, signal=81%
GO_POSITIVE_REGULATION_OF_LEUKOCYTE_ADHESION_TO_VASCULAR_ENDOTHELIAL_CELL	20	-0.742716	-1.94557	0	0.000418763	0.112	2412	tags=60%, list=13%, signal=69%
GO_POSITIVE_REGULATION_OF_PEPTIDYL_TYROSINE_PHOSPHORYLATION	191	-0.569328	-1.94346	0	0.000443385	0.119	4574	tags=51%, list=24%, signal=66%
GO_CELL_KILLING	163	-0.573015	-1.94312	0	0.00044153	0.119	4880	tags=52%, list=26%, signal=70%
GO_REGULATION_OF_CHEMOTAXIS	220	-0.565346	-1.94262	0	0.000453645	0.123	4481	tags=50%, list=24%, signal=65%
GO_POSITIVE_REGULATION_OF_LEUKOCYTE_CHEMOTAXIS	96	-0.598435	-1.94184	0	0.000476101	0.13	4593	tags=57%, list=24%, signal=75%
GO_REGULATION_OF_NATURAL_KILLER_CELL_MEDIATED_IMMUNITY	39	-0.652454	-1.94041	0	0.000479091	0.131	4765	tags=72%, list=25%, signal=96%
GO_MAST_CELL_ACTIVATION	61	-0.631174	-1.94038	0	0.000477128	0.131	4284	tags=57%, list=22%, signal=74%
GO_NEGATIVE_REGULATION_OF_LEUKOCYTE_MEDIATED_IMMUNITY	47	-0.639474	-1.93937	0	0.000495687	0.136	4977	tags=66%, list=26%, signal=89%
GO_HIGH_DENSITY_LIPOPROTEIN_PARTICLE	27	-0.699549	-1.93875	0	0.000500516	0.137	2189	tags=33%, list=11%, signal=38%
GO_REGULATION_OF_PLATELET_ACTIVATION	36	-0.662155	-1.93864	0	0.000498489	0.137	4185	tags=61%, list=22%, signal=78%
GO_REGULATION_OF_LIPASE_ACTIVITY	99	-0.595446	-1.93819	0	0.00049984	0.138	4085	tags=45%, list=21%, signal=58%
GO_EXTRACELLULAR_STRUCTURE_ORGANIZATION	392	-0.557616	-1.93807	0	0.000497833	0.138	4082	tags=45%, list=21%, signal=56%
GO_RESPONSE_TO_INTERFERON_GAMMA	182	-0.567999	-1.9373	0	0.000495842	0.138	4364	tags=50%, list=23%, signal=64%
GO_POSITIVE_REGULATION_OF_EXTRACELLULAR_MATRIX_ORGANIZATION	21	-0.733725	-1.93648	0	0.000500557	0.14	2812	tags=57%, list=15%, signal=67%
GO_REGULATION_OF_PEPTIDYL_TYROSINE_PHOSPHORYLATION	254	-0.560318	-1.93618	0	0.00050189	0.14	4327	tags=49%, list=23%, signal=62%
GO_NEGATIVE_REGULATION_OF_SMOOTH_MUSCLE_CELL_PROLIFERATION	46	-0.640162	-1.93564	0	0.000503217	0.141	5270	tags=72%, list=28%, signal=99%
GO_ALPHA_BETA_T_CELL_PROLIFERATION	34	-0.66928	-1.93564	0	0.000501236	0.141	4242	tags=68%, list=22%, signal=87%
GO_POSITIVE_REGULATION_OF_ALPHA_BETA_T_CELL_ACTIVATION	60	-0.62639	-1.93542	0	0.000502552	0.142	3921	tags=60%, list=21%, signal=75%
GO_POSITIVE_REGULATION_OF_EPITHELIAL_CELL_MIGRATION	143	-0.572846	-1.93504	0	0.000507112	0.144	2996	tags=38%, list=16%, signal=44%
GO_POSITIVE_REGULATION_OF_ENDOTHELIAL_CELL_MIGRATION	100	-0.583366	-1.93452	0	0.000511658	0.146	2996	tags=38%, list=16%, signal=45%
GO_RESPONSE_TO_PROSTAGLANDIN	32	-0.676763	-1.93252	0	0.000529151	0.15	1947	tags=47%, list=10%, signal=52%
GO_LEUKOCYTE_ACTIVATION_INVOLVED_IN_INFLAMMATORY_RESPONSE	46	-0.64037	-1.9307	0	0.000547637	0.157	5869	tags=76%, list=31%, signal=110%
GO_RENAL_SYSTEM_VASCULATURE_DEVELOPMENT	27	-0.699766	-1.9307	0	0.000545539	0.157	2858	tags=59%, list=15%, signal=70%
GO_ANTIBACTERIAL_HUMORAL_RESPONSE	55	-0.62653	-1.93061	0	0.000543457	0.157	1770	tags=31%, list=9%, signal=34%
GO_CELLULAR_RESPONSE_TO_VASCULAR_ENDOTHELIAL_GROWTH_FACTOR_STIMULUS	57	-0.62038	-1.92979	0	0.000547733	0.159	3588	tags=51%, list=19%, signal=62%
GO_REGULATION_OF_B_CELL_PROLIFERATION	62	-0.612949	-1.92922	0	0.000558337	0.163	4285	tags=68%, list=22%, signal=87%
GO_LIPOPOLYSACCHARIDE_MEDIATED_SIGNALING_PATHWAY	58	-0.633073	-1.92909	0	0.00055623	0.163	3934	tags=59%, list=21%, signal=74%
GO_NEGATIVE_REGULATION_OF_ENDOTHELIAL_CELL_PROLIFERATION	41	-0.640535	-1.92689	0	0.000561475	0.166	2601	tags=44%, list=14%, signal=51%
GO_TISSUE_MIGRATION	295	-0.558437	-1.92689	0	0.00055938	0.166	3511	tags=41%, list=18%, signal=49%
GO_NEGATIVE_REGULATION_OF_IMMUNE_SYSTEM_PROCESS	430	-0.549328	-1.92595	0	0.000582221	0.172	4085	tags=47%, list=21%, signal=58%
GO_REGULATION_OF_ENDOTHELIAL_CELL_MIGRATION	161	-0.569151	-1.92561	0	0.000583156	0.172	3886	tags=46%, list=20%, signal=57%
GO_MATURE_B_CELL_DIFFERENTIATION	26	-0.702894	-1.92492	0	0.000591202	0.175	4069	tags=69%, list=21%, signal=88%
GO_MAST_CELL_MEDIATED_IMMUNITY	49	-0.634985	-1.92488	0	0.000589036	0.175	4284	tags=59%, list=22%, signal=76%
GO_NEGATIVE_REGULATION_OF_LEUKOCYTE_PROLIFERATION	83	-0.597751	-1.92416	0	0.000589944	0.176	4052	tags=53%, list=21%, signal=67%
GO_REGULATION_OF_LEUKOCYTE_MEDIATED_IMMUNITY	204	-0.562344	-1.92362	0	0.000599959	0.18	4495	tags=55%, list=24%, signal=71%
GO_POSITIVE_REGULATION_OF_LEUKOCYTE_DIFFERENTIATION	154	-0.574678	-1.92318	0	0.000609912	0.183	4493	tags=52%, list=24%, signal=67%
GO_SMOOTH_MUSCLE_CELL_PROLIFERATION	137	-0.575301	-1.92217	0	0.000613772	0.185	3958	tags=46%, list=21%, signal=58%
GO_REGULATION_OF_CD4_POSITIVE_ALPHA_BETA_T_CELL_ACTIVATION	62	-0.617673	-1.92165	0	0.000623603	0.188	3776	tags=55%, list=20%, signal=68%
GO_NEGATIVE_REGULATION_OF_CYTOKINE_PRODUCTION	266	-0.558428	-1.92141	0	0.000624372	0.189	3949	tags=46%, list=21%, signal=58%
GO_CHEMOKINE_RECEPTOR_BINDING	65	-0.614031	-1.92103	0	0.000625119	0.19	4214	tags=51%, list=22%, signal=65%
GO_DENDRITIC_CELL_DIFFERENTIATION	41	-0.648937	-1.92007	0	0.000628866	0.192	4284	tags=63%, list=22%, signal=82%
GO_SPROUTING_ANGIOGENESIS	120	-0.579617	-1.91898	0	0.00063855	0.195	2984	tags=41%, list=16%, signal=48%
GO_T_CELL_DIFFERENTIATION_INVOLVED_IN_IMMUNE_RESPONSE	70	-0.600423	-1.91811	0	0.00065109	0.197	3776	tags=53%, list=20%, signal=66%
GO_NEGATIVE_REGULATION_OF_CELL_ADHESION	275	-0.559813	-1.91771	0	0.000654712	0.199	4311	tags=50%, list=23%, signal=63%
GO_TYROSINE_PHOSPHORYLATION_OF_STAT_PROTEIN	81	-0.592715	-1.91691	0	0.000664164	0.203	4574	tags=51%, list=24%, signal=66%
GO_REGULATION_OF_T_CELL_MIGRATION	44	-0.63815	-1.91588	0	0.000679406	0.207	4148	tags=61%, list=22%, signal=78%
GO_ENDOTHELIUM_DEVELOPMENT	121	-0.576777	-1.91483	0	0.000700368	0.215	3730	tags=45%, list=20%, signal=55%
GO_ERK1_AND_ERK2_CASCADE	303	-0.556444	-1.91465	0	0.000700854	0.215	4541	tags=49%, list=24%, signal=63%
GO_MAINTENANCE_OF_BLOOD_BRAIN_BARRIER	34	-0.665493	-1.91406	0	0.000704208	0.217	1977	tags=38%, list=10%, signal=43%
GO_NEGATIVE_REGULATION_OF_ANTIGEN_RECEPTOR_MEDIATED_SIGNALING_PATHWAY	30	-0.681169	-1.9138	0	0.000707569	0.218	3910	tags=67%, list=21%, signal=84%
GO_POSITIVE_REGULATION_OF_RECEPTOR_SIGNALING_PATHWAY_VIA_STAT	89	-0.584047	-1.91361	0	0.000708009	0.22	4574	tags=53%, list=24%, signal=69%
GO_NEGATIVE_REGULATION_OF_MYOBLAST_DIFFERENTIATION	25	-0.699475	-1.91276	0	0.000731403	0.227	3957	tags=68%, list=21%, signal=86%
GO_REGULATION_OF_NEUROINFLAMMATORY_RESPONSE	33	-0.663405	-1.91246	0.00116009	0.000731779	0.227	4284	tags=64%, list=22%, signal=82%
GO_REGULATION_OF_SYSTEMIC_ARTERIAL_BLOOD_PRESSURE_MEDIATED_BY_A_CHEMICAL_SIGNAL	50	-0.635668	-1.91093	0	0.000749518	0.232	3482	tags=46%, list=18%, signal=56%
GO_NEGATIVE_REGULATION_OF_BLOOD_VESSEL_ENDOTHELIAL_CELL_MIGRATION	35	-0.662414	-1.90988	0	0.000764239	0.237	3859	tags=57%, list=20%, signal=72%
GO_TISSUE_REMODELING	162	-0.566005	-1.90916	0	0.000772924	0.24	4063	tags=47%, list=21%, signal=59%
GO_C_C_CHEMOKINE_BINDING	24	-0.707557	-1.90843	0	0.000789991	0.246	3730	tags=67%, list=20%, signal=83%
GO_REGULATION_OF_LYMPHOCYTE_APOPTOTIC_PROCESS	55	-0.617946	-1.90642	0	0.000809762	0.252	4158	tags=56%, list=22%, signal=72%
GO_CELLULAR_DEFENSE_RESPONSE	52	-0.624646	-1.90621	0	0.000823727	0.255	4454	tags=62%, list=23%, signal=80%
GO_POSITIVE_REGULATION_OF_CYTOSOLIC_CALCIUM_ION_CONCENTRATION_INVOLVED_IN_PHOSPHOLIPASE_C_ACTIVATING_G_PROTEIN_COUPLED_SIGNALING_PATHWAY	33	-0.674456	-1.90618	0	0.000821009	0.255	3470	tags=55%, list=18%, signal=67%
GO_NATURAL_KILLER_CELL_MEDIATED_IMMUNITY	60	-0.622114	-1.90594	0	0.000823804	0.257	5058	tags=65%, list=27%, signal=88%
GO_POSITIVE_REGULATION_OF_CD4_POSITIVE_ALPHA_BETA_T_CELL_ACTIVATION	35	-0.659248	-1.90587	0	0.000823847	0.257	3776	tags=63%, list=20%, signal=78%
GO_REGULATION_OF_EPITHELIAL_CELL_APOPTOTIC_PROCESS	78	-0.594943	-1.9047	0	0.000843028	0.263	3627	tags=46%, list=19%, signal=57%
GO_MACROPHAGE_MIGRATION	54	-0.62486	-1.90454	0	0.000840282	0.263	4832	tags=59%, list=25%, signal=79%
GO_REGULATION_OF_T_CELL_DIFFERENTIATION	145	-0.567252	-1.90452	0	0.000837554	0.263	4039	tags=50%, list=21%, signal=63%
GO_NEGATIVE_REGULATION_OF_INTERLEUKIN_6_PRODUCTION	40	-0.642119	-1.90441	0	0.000834843	0.263	3859	tags=58%, list=20%, signal=72%
GO_POSITIVE_REGULATION_OF_ACTIVATED_T_CELL_PROLIFERATION	24	-0.704506	-1.90328	0	0.000856424	0.271	1915	tags=50%, list=10%, signal=56%
GO_POSITIVE_REGULATION_OF_CHEMOKINE_PRODUCTION	59	-0.611446	-1.90302	0	0.000859041	0.273	4686	tags=61%, list=25%, signal=81%
GO_G_PROTEIN_COUPLED_CHEMOATTRACTANT_RECEPTOR_ACTIVITY	26	-0.680171	-1.90271	0	0.000866995	0.276	3730	tags=65%, list=20%, signal=81%
GO_T_CELL_DIFFERENTIATION_IN_THYMUS	76	-0.593987	-1.90193	0	0.000880259	0.281	3894	tags=53%, list=20%, signal=66%
GO_REGULATION_OF_NITRIC_OXIDE_BIOSYNTHETIC_PROCESS	56	-0.6168	-1.90131	0	0.000877456	0.281	4024	tags=54%, list=21%, signal=68%
GO_POSITIVE_REGULATION_OF_VASOCONSTRICTION	33	-0.669173	-1.90079	0	0.00087467	0.281	3324	tags=45%, list=17%, signal=55%
GO_POSITIVE_REGULATION_OF_INTERLEUKIN_1_PRODUCTION	58	-0.618672	-1.90004	0	0.000871804	0.282	4971	tags=60%, list=26%, signal=81%
GO_NEGATIVE_REGULATION_OF_LYMPHOCYTE_MEDIATED_IMMUNITY	37	-0.65261	-1.89882	0	0.000900677	0.292	4727	tags=68%, list=25%, signal=90%
GO_ACTIVATION_OF_IMMUNE_RESPONSE	452	-0.538407	-1.89637	0	0.000937295	0.304	4061	tags=43%, list=21%, signal=53%
GO_POSITIVE_REGULATION_OF_MUSCLE_CONTRACTION	44	-0.633813	-1.89605	0	0.000936646	0.306	3509	tags=52%, list=18%, signal=64%
GO_NEGATIVE_REGULATION_OF_STRIATED_MUSCLE_CELL_DIFFERENTIATION	35	-0.654835	-1.89598	0	0.000933737	0.306	2677	tags=46%, list=14%, signal=53%
GO_NEGATIVE_REGULATION_OF_INTERLEUKIN_1_BETA_PRODUCTION	24	-0.693175	-1.89592	0	0.000930846	0.306	4495	tags=71%, list=24%, signal=93%
GO_NEGATIVE_REGULATION_OF_INTERLEUKIN_1_PRODUCTION	29	-0.669908	-1.89533	0	0.000938329	0.309	4495	tags=66%, list=24%, signal=86%
GO_REGULATION_OF_VASOCONSTRICTION	59	-0.610818	-1.89499	0	0.000940591	0.311	4882	tags=54%, list=26%, signal=73%
GO_POSITIVE_REGULATION_OF_FAT_CELL_DIFFERENTIATION	68	-0.597426	-1.89199	0	0.00100648	0.331	3955	tags=51%, list=21%, signal=65%
GO_CELLULAR_RESPONSE_TO_RETINOIC_ACID	67	-0.597741	-1.89112	0	0.00101869	0.337	3747	tags=48%, list=20%, signal=59%
GO_MYOBLAST_DIFFERENTIATION	86	-0.590794	-1.89046	0	0.0010207	0.338	3970	tags=48%, list=21%, signal=60%
GO_REGULATION_OF_SPROUTING_ANGIOGENESIS	72	-0.600174	-1.89028	0	0.00102016	0.339	3807	tags=47%, list=20%, signal=59%
GO_NEGATIVE_REGULATION_OF_RESPONSE_TO_EXTERNAL_STIMULUS	361	-0.547245	-1.88983	0	0.00102214	0.34	4502	tags=47%, list=24%, signal=60%
GO_B_CELL_ACTIVATION	268	-0.546664	-1.88926	0	0.00103673	0.344	4572	tags=53%, list=24%, signal=69%
GO_REGULATION_OF_ADAPTIVE_IMMUNE_RESPONSE	161	-0.557166	-1.88918	0	0.00103615	0.345	3949	tags=49%, list=21%, signal=61%
GO_POSITIVE_REGULATION_OF_ALPHA_BETA_T_CELL_DIFFERENTIATION	46	-0.633986	-1.88889	0	0.00104058	0.348	3921	tags=59%, list=21%, signal=74%
GO_REGULATION_OF_SYSTEMIC_ARTERIAL_BLOOD_PRESSURE_BY_HORMONE	40	-0.629563	-1.88551	0.00114679	0.00110341	0.367	3225	tags=43%, list=17%, signal=51%
GO_CYTOKINE_METABOLIC_PROCESS	67	-0.599419	-1.88431	0	0.00112493	0.374	4284	tags=55%, list=22%, signal=71%
GO_REGULATION_OF_LYMPHOCYTE_DIFFERENTIATION	175	-0.556483	-1.8835	0	0.00114385	0.381	4039	tags=49%, list=21%, signal=61%
GO_PROTEIN_LIPID_COMPLEX	39	-0.643883	-1.88348	0	0.00114048	0.381	2189	tags=28%, list=11%, signal=32%
GO_DIGESTIVE_TRACT_MORPHOGENESIS	47	-0.617251	-1.88208	0	0.00117786	0.387	2932	tags=40%, list=15%, signal=48%
GO_PHAGOCYTOSIS	286	-0.545065	-1.8809	0	0.00119636	0.392	3940	tags=42%, list=21%, signal=53%
GO_LYMPH_VESSEL_MORPHOGENESIS	20	-0.719558	-1.88045	0	0.00120748	0.396	2426	tags=65%, list=13%, signal=74%
GO_TYPE_2_IMMUNE_RESPONSE	39	-0.634573	-1.88002	0	0.00121123	0.398	4284	tags=59%, list=22%, signal=76%
GO_REGULATION_OF_REACTIVE_OXYGEN_SPECIES_BIOSYNTHETIC_PROCESS	89	-0.585606	-1.87872	0	0.00124162	0.404	4024	tags=48%, list=21%, signal=61%
GO_NEGATIVE_REGULATION_OF_CYTOKINE_SECRETION	27	-0.682807	-1.87743	0	0.00128634	0.413	3910	tags=59%, list=21%, signal=74%
GO_REGULATION_OF_MAST_CELL_ACTIVATION	44	-0.630119	-1.87739	0	0.00128265	0.413	4284	tags=59%, list=22%, signal=76%
GO_BLOOD_MICROPARTICLE	124	-0.561582	-1.87688	0	0.00130058	0.418	4032	tags=40%, list=21%, signal=50%
GO_POSITIVE_CHEMOTAXIS	65	-0.599805	-1.87658	0	0.00129925	0.418	2282	tags=32%, list=12%, signal=37%
GO_REGULATION_OF_NATURAL_KILLER_CELL_ACTIVATION	32	-0.647717	-1.87637	0	0.00130032	0.418	3724	tags=59%, list=20%, signal=74%
GO_REGULATION_OF_ALPHA_BETA_T_CELL_DIFFERENTIATION	63	-0.597983	-1.87531	0	0.00132752	0.426	3921	tags=56%, list=21%, signal=70%
GO_POSITIVE_REGULATION_OF_REACTIVE_OXYGEN_SPECIES_METABOLIC_PROCESS	96	-0.57587	-1.87517	0	0.00132852	0.427	4482	tags=52%, list=24%, signal=68%
GO_T_CELL_ACTIVATION_INVOLVED_IN_IMMUNE_RESPONSE	107	-0.572396	-1.87475	0	0.00133657	0.431	3910	tags=47%, list=21%, signal=58%
GO_POSITIVE_REGULATION_OF_TYROSINE_PHOSPHORYLATION_OF_STAT_PROTEIN	67	-0.590991	-1.87475	0	0.0013328	0.431	4574	tags=52%, list=24%, signal=69%
GO_POSITIVE_REGULATION_OF_EPITHELIAL_TO_MESENCHYMAL_TRANSITION	47	-0.615214	-1.87409	0	0.00134319	0.435	5366	tags=64%, list=28%, signal=89%
GO_MUSCLE_CELL_PROLIFERATION	191	-0.545276	-1.87393	0	0.00134178	0.435	4493	tags=47%, list=24%, signal=60%
GO_ACUTE_INFLAMMATORY_RESPONSE	107	-0.566129	-1.87289	0	0.00135439	0.438	5184	tags=55%, list=27%, signal=75%
GO_REGULATION_OF_T_CELL_MEDIATED_IMMUNITY	67	-0.594339	-1.87192	0	0.0013739	0.443	3949	tags=51%, list=21%, signal=64%
GO_POSITIVE_REGULATION_OF_PHAGOCYTOSIS	66	-0.600743	-1.87157	0	0.00138408	0.445	6133	tags=71%, list=32%, signal=105%
GO_T_CELL_APOPTOTIC_PROCESS	49	-0.615986	-1.87131	0	0.00138255	0.446	4158	tags=53%, list=22%, signal=68%
GO_B_CELL_PROLIFERATION	97	-0.574328	-1.87071	0	0.00140187	0.454	4391	tags=56%, list=23%, signal=72%
GO_POSITIVE_REGULATION_OF_INTERLEUKIN_10_PRODUCTION	37	-0.637024	-1.86911	0.00113379	0.00142931	0.467	4971	tags=76%, list=26%, signal=102%
GO_COLLAGEN_METABOLIC_PROCESS	103	-0.567535	-1.86843	0	0.00143685	0.47	5366	tags=56%, list=28%, signal=78%
GO_CELL_ADHESION_MEDIATED_BY_INTEGRIN	71	-0.585979	-1.8684	0	0.00143293	0.47	4109	tags=58%, list=22%, signal=73%
GO_DEFENSE_RESPONSE_TO_BACTERIUM	280	-0.543142	-1.8679	0	0.00144498	0.473	4276	tags=41%, list=22%, signal=53%
GO_ALPHA_BETA_T_CELL_ACTIVATION_INVOLVED_IN_IMMUNE_RESPONSE	62	-0.605775	-1.8677	0	0.00144562	0.475	3776	tags=55%, list=20%, signal=68%
GO_RESPONSE_TO_FUNGUS	53	-0.6086	-1.86743	0	0.0014485	0.477	5767	tags=58%, list=30%, signal=84%
GO_BASEMENT_MEMBRANE	102	-0.56893	-1.86683	0	0.00145647	0.482	4154	tags=48%, list=22%, signal=61%
GO_LYMPH_VESSEL_DEVELOPMENT	26	-0.685522	-1.86637	0	0.00146826	0.485	3446	tags=69%, list=18%, signal=84%
GO_EPIDERMIS_MORPHOGENESIS	32	-0.649966	-1.86585	0.00117371	0.00147164	0.488	2340	tags=41%, list=12%, signal=46%
GO_MAST_CELL_GRANULE	22	-0.699297	-1.86546	0	0.00146605	0.488	3965	tags=68%, list=21%, signal=86%
GO_ENDOTHELIAL_CELL_PROLIFERATION	146	-0.554056	-1.86533	0	0.00146217	0.488	3627	tags=42%, list=19%, signal=51%
GO_POSITIVE_REGULATION_OF_CELLULAR_EXTRAVASATION	21	-0.699839	-1.86464	0	0.00148483	0.497	5169	tags=86%, list=27%, signal=118%
GO_LEUKOCYTE_HOMEOSTASIS	84	-0.575782	-1.86408	0	0.00150072	0.502	4572	tags=55%, list=24%, signal=72%
GO_POSITIVE_REGULATION_OF_PRI_MIRNA_TRANSCRIPTION_BY_RNA_POLYMERASE_II	40	-0.635697	-1.86377	0	0.00149899	0.502	1570	tags=38%, list=8%, signal=41%
GO_DETECTION_OF_BIOTIC_STIMULUS	32	-0.653	-1.86374	0	0.00149507	0.502	5060	tags=72%, list=27%, signal=98%
GO_SCAVENGER_RECEPTOR_ACTIVITY	47	-0.610882	-1.86367	0	0.00149116	0.502	3826	tags=51%, list=20%, signal=64%
GO_INTERMEDIATE_FILAMENT_ORGANIZATION	25	-0.681349	-1.86282	0	0.00151819	0.508	3385	tags=40%, list=18%, signal=49%
GO_REGULATION_OF_MYELOID_LEUKOCYTE_MEDIATED_IMMUNITY	57	-0.595989	-1.86213	0	0.00154713	0.516	4482	tags=58%, list=24%, signal=75%
GO_REGULATION_OF_CD4_POSITIVE_ALPHA_BETA_T_CELL_DIFFERENTIATION	47	-0.61456	-1.86209	0	0.00154314	0.517	3776	tags=57%, list=20%, signal=71%
GO_RESPONSE_TO_INTERLEUKIN_6	42	-0.623122	-1.8617	0	0.00154776	0.517	3591	tags=50%, list=19%, signal=61%
GO_POSITIVE_REGULATION_OF_CYTOKINE_PRODUCTION	444	-0.529531	-1.86104	0	0.00155666	0.52	4541	tags=47%, list=24%, signal=60%
GO_REGULATION_OF_BLOOD_PRESSURE	183	-0.548495	-1.86062	0	0.00155908	0.522	3795	tags=37%, list=20%, signal=46%
GO_POSITIVE_REGULATION_OF_CD4_POSITIVE_ALPHA_BETA_T_CELL_DIFFERENTIATION	29	-0.667087	-1.86058	0	0.00155937	0.523	3776	tags=66%, list=20%, signal=82%
GO_REGULATION_OF_STRIATED_MUSCLE_CELL_DIFFERENTIATION	99	-0.571381	-1.86038	0	0.00156391	0.525	4552	tags=52%, list=24%, signal=67%
GO_G_PROTEIN_COUPLED_RECEPTOR_BINDING	284	-0.539744	-1.86019	0	0.00156842	0.526	4978	tags=47%, list=26%, signal=63%
GO_T_CELL_MEDIATED_CYTOTOXICITY	37	-0.642047	-1.85976	0	0.00157933	0.529	3910	tags=59%, list=21%, signal=75%
GO_AMEBOIDAL_TYPE_CELL_MIGRATION	399	-0.538897	-1.85961	0	0.00157534	0.529	3886	tags=41%, list=20%, signal=50%
GO_REGULATION_OF_LYMPHOCYTE_MEDIATED_IMMUNITY	147	-0.551556	-1.8596	0	0.00157137	0.529	4882	tags=57%, list=26%, signal=76%
GO_PLASMA_MEMBRANE_SIGNALING_RECEPTOR_COMPLEX	237	-0.542705	-1.85911	0	0.00157797	0.531	3803	tags=44%, list=20%, signal=54%
GO_POSITIVE_REGULATION_OF_INTERLEUKIN_6_PRODUCTION	83	-0.58018	-1.85894	0	0.00157216	0.531	3992	tags=54%, list=21%, signal=68%
GO_NEGATIVE_REGULATION_OF_INNATE_IMMUNE_RESPONSE	53	-0.60308	-1.85797	0	0.00158497	0.534	4832	tags=60%, list=25%, signal=81%
GO_POSITIVE_REGULATION_OF_INTERFERON_GAMMA_PRODUCTION	61	-0.589663	-1.85778	0	0.00158102	0.534	2895	tags=46%, list=15%, signal=54%
GO_REGULATION_OF_MYOTUBE_DIFFERENTIATION	54	-0.595845	-1.85718	0	0.0015875	0.536	4449	tags=56%, list=23%, signal=72%
GO_POSITIVE_REGULATION_OF_CYTOKINE_SECRETION	65	-0.591646	-1.85716	0	0.00158357	0.536	2877	tags=38%, list=15%, signal=45%
GO_RESPONSE_TO_FATTY_ACID	88	-0.571998	-1.85693	0	0.00158792	0.537	2237	tags=36%, list=12%, signal=41%
GO_CALCIUM_INDEPENDENT_CELL_CELL_ADHESION_VIA_PLASMA_MEMBRANE_CELL_ADHESION_MOLECULES	22	-0.69433	-1.85631	0	0.0015904	0.54	2509	tags=41%, list=13%, signal=47%
GO_CELL_MIGRATION_INVOLVED_IN_SPROUTING_ANGIOGENESIS	54	-0.605299	-1.85422	0	0.0016358	0.557	3807	tags=48%, list=20%, signal=60%
GO_WNT_PROTEIN_BINDING	30	-0.659101	-1.85416	0	0.00163181	0.557	3720	tags=60%, list=20%, signal=74%
GO_POSITIVE_REGULATION_OF_CELL_SUBSTRATE_ADHESION	121	-0.559987	-1.8529	0	0.00165638	0.566	3899	tags=41%, list=20%, signal=52%
GO_ACTOMYOSIN	78	-0.577672	-1.85278	0	0.0016544	0.566	3432	tags=42%, list=18%, signal=51%
GO_MATURE_B_CELL_DIFFERENTIATION_INVOLVED_IN_IMMUNE_RESPONSE	20	-0.721941	-1.85223	0	0.00167876	0.573	4069	tags=70%, list=21%, signal=89%
GO_MYELOID_DENDRITIC_CELL_ACTIVATION	29	-0.665225	-1.85159	0	0.00169697	0.577	3208	tags=52%, list=17%, signal=62%
GO_RESPONSE_TO_PROTOZOAN	25	-0.677387	-1.85117	0	0.001709	0.58	4978	tags=68%, list=26%, signal=92%
GO_REGULATION_OF_WOUND_HEALING	140	-0.554975	-1.85116	0	0.00170489	0.58	4185	tags=44%, list=22%, signal=55%
GO_NEGATIVE_REGULATION_OF_CARDIAC_MUSCLE_TISSUE_DEVELOPMENT	34	-0.63871	-1.85099	0	0.00170483	0.58	2941	tags=35%, list=15%, signal=42%
GO_POSITIVE_REGULATION_OF_COAGULATION	29	-0.65432	-1.85076	0.00118064	0.00171676	0.582	3095	tags=41%, list=16%, signal=49%
GO_REGULATION_OF_CARDIOCYTE_DIFFERENTIATION	48	-0.610882	-1.85033	0	0.00172065	0.584	2677	tags=40%, list=14%, signal=46%
GO_REGULATION_OF_ACTIN_FILAMENT_BUNDLE_ASSEMBLY	99	-0.561889	-1.84892	0	0.00178606	0.599	4172	tags=44%, list=22%, signal=57%
GO_REGULATION_OF_PHAGOCYTOSIS	93	-0.572136	-1.84886	0	0.00178381	0.6	6171	tags=66%, list=32%, signal=97%
GO_TUMOR_NECROSIS_FACTOR_SECRETION	38	-0.6294	-1.84864	0	0.00178752	0.604	2800	tags=37%, list=15%, signal=43%
GO_REGULATION_OF_HAIR_FOLLICLE_DEVELOPMENT	21	-0.709727	-1.84851	0.00122549	0.00178922	0.606	2282	tags=38%, list=12%, signal=43%
GO_REGULATION_OF_EPITHELIAL_CELL_MIGRATION	223	-0.540889	-1.84707	0	0.00183585	0.617	3886	tags=41%, list=20%, signal=51%
GO_REGULATION_OF_GRANULOCYTE_CHEMOTAXIS	51	-0.600304	-1.84688	0	0.00183351	0.618	3627	tags=51%, list=19%, signal=63%
GO_NEGATIVE_REGULATION_OF_MUSCLE_TISSUE_DEVELOPMENT	53	-0.594199	-1.84686	0	0.00182922	0.618	2941	tags=36%, list=15%, signal=42%
GO_DETECTION_OF_EXTERNAL_BIOTIC_STIMULUS	21	-0.700329	-1.84686	0	0.00182496	0.618	5060	tags=81%, list=27%, signal=110%
GO_LYMPHOCYTE_APOPTOTIC_PROCESS	72	-0.577078	-1.84638	0	0.00183009	0.621	4158	tags=51%, list=22%, signal=65%
GO_REGULATION_OF_CYTOKINE_PRODUCTION_INVOLVED_IN_IMMUNE_RESPONSE	79	-0.58013	-1.84608	0	0.00182973	0.622	3992	tags=53%, list=21%, signal=67%
GO_REGULATION_OF_TOLL_LIKE_RECEPTOR_SIGNALING_PATHWAY	68	-0.575868	-1.8458	0	0.00184287	0.624	3682	tags=49%, list=19%, signal=60%
GO_POSITIVE_REGULATION_OF_LYMPHOCYTE_MIGRATION	38	-0.629627	-1.84528	0	0.00185211	0.627	4148	tags=58%, list=22%, signal=74%
GO_PEPTIDYL_TYROSINE_AUTOPHOSPHORYLATION	41	-0.621035	-1.84465	0	0.00186474	0.631	2602	tags=39%, list=14%, signal=45%
GO_REGULATION_OF_OSTEOBLAST_DIFFERENTIATION	117	-0.559204	-1.84436	0	0.00187002	0.632	3859	tags=47%, list=20%, signal=59%
GO_INTERMEDIATE_FILAMENT_BASED_PROCESS	51	-0.601809	-1.84425	0	0.00186767	0.633	2776	tags=31%, list=15%, signal=37%
GO_INTEGRIN_ACTIVATION	24	-0.682988	-1.84381	0.00119474	0.00187105	0.635	3328	tags=67%, list=17%, signal=81%
GO_POSITIVE_REGULATION_OF_IMMUNE_EFFECTOR_PROCESS	211	-0.540253	-1.84212	0	0.00192215	0.647	4484	tags=50%, list=24%, signal=65%
GO_REGULATION_OF_FAT_CELL_DIFFERENTIATION	132	-0.550572	-1.8418	0	0.00192158	0.649	3546	tags=42%, list=19%, signal=51%
GO_POSITIVE_REGULATION_OF_TUMOR_NECROSIS_FACTOR_SUPERFAMILY_CYTOKINE_PRODUCTION	90	-0.566153	-1.8418	0	0.00191727	0.649	4024	tags=48%, list=21%, signal=60%
GO_ACTIN_FILAMENT_BUNDLE	75	-0.579579	-1.84171	0	0.00191673	0.65	3087	tags=41%, list=16%, signal=49%
GO_REGULATION_OF_LEUKOCYTE_DIFFERENTIATION	278	-0.535012	-1.84167	0	0.00191431	0.65	4845	tags=51%, list=25%, signal=67%
GO_NOTCH_BINDING	25	-0.661791	-1.84147	0	0.00191753	0.65	998	tags=32%, list=5%, signal=34%
GO_REGULATION_OF_ACUTE_INFLAMMATORY_RESPONSE	46	-0.609981	-1.84131	0	0.001917	0.651	5174	tags=63%, list=27%, signal=86%
GO_IMMUNE_RESPONSE_REGULATING_SIGNALING_PATHWAY	402	-0.532547	-1.8408	0	0.00193506	0.656	4013	tags=42%, list=21%, signal=52%
GO_REGULATION_OF_RESPONSE_TO_WOUNDING	168	-0.546304	-1.84011	0	0.00193392	0.658	4240	tags=44%, list=22%, signal=56%
GO_NEGATIVE_REGULATION_OF_EPITHELIAL_CELL_MIGRATION	69	-0.577932	-1.83955	0	0.00195366	0.664	4284	tags=49%, list=22%, signal=63%
GO_CARGO_RECEPTOR_ACTIVITY	73	-0.578543	-1.8392	0	0.00196225	0.664	3826	tags=47%, list=20%, signal=58%
GO_REGULATION_OF_TYPE_2_IMMUNE_RESPONSE	31	-0.656195	-1.83916	0	0.00196161	0.664	4242	tags=61%, list=22%, signal=79%
GO_GLAND_MORPHOGENESIS	120	-0.55915	-1.83907	0	0.00195915	0.664	3970	tags=47%, list=21%, signal=59%
GO_CELLULAR_RESPONSE_TO_BIOTIC_STIMULUS	228	-0.53876	-1.83882	0	0.00196583	0.667	4978	tags=54%, list=26%, signal=72%
GO_MACROPHAGE_CHEMOTAXIS	41	-0.629186	-1.83841	0	0.00198527	0.672	2053	tags=37%, list=11%, signal=41%
GO_REGULATION_OF_CYTOSOLIC_CALCIUM_ION_CONCENTRATION	348	-0.532694	-1.8382	0	0.00198642	0.673	4882	tags=45%, list=26%, signal=59%
GO_NEGATIVE_REGULATION_OF_COAGULATION	53	-0.593665	-1.83785	0	0.00199666	0.676	4350	tags=47%, list=23%, signal=61%
GO_ACTIN_CYTOSKELETON_REORGANIZATION	105	-0.559121	-1.83755	0	0.00200253	0.679	3664	tags=41%, list=19%, signal=50%
GO_EPITHELIAL_CELL_DIFFERENTIATION_INVOLVED_IN_KIDNEY_DEVELOPMENT	47	-0.601754	-1.83721	0	0.00201448	0.681	4012	tags=47%, list=21%, signal=59%
GO_VASCULAR_PROCESS_IN_CIRCULATORY_SYSTEM	184	-0.543974	-1.83697	0	0.00201014	0.681	3545	tags=40%, list=19%, signal=49%
GO_POSITIVE_REGULATION_OF_HEMOPOIESIS	197	-0.541119	-1.8362	0	0.00202923	0.687	4157	tags=45%, list=22%, signal=57%
GO_REGULATION_OF_TISSUE_REMODELING	76	-0.575818	-1.83598	0	0.00203208	0.689	4158	tags=53%, list=22%, signal=67%
GO_TRANSFORMING_GROWTH_FACTOR_BETA_PRODUCTION	37	-0.628359	-1.83588	0	0.0020331	0.69	2900	tags=46%, list=15%, signal=54%
GO_REGULATION_OF_MACROPHAGE_ACTIVATION	55	-0.602921	-1.83548	0	0.00205025	0.693	4928	tags=62%, list=26%, signal=83%
GO_POSITIVE_REGULATION_OF_GLIAL_CELL_DIFFERENTIATION	40	-0.624246	-1.83522	0	0.00205481	0.693	2920	tags=40%, list=15%, signal=47%
GO_RECEPTOR_COMPLEX	448	-0.527808	-1.8351	0	0.002054	0.694	3940	tags=40%, list=21%, signal=49%
GO_INTEGRIN_MEDIATED_SIGNALING_PATHWAY	108	-0.554912	-1.83464	0	0.00207096	0.699	4013	tags=50%, list=21%, signal=63%
GO_SMOOTH_MUSCLE_CONTRACTION	104	-0.561617	-1.83458	0	0.00206657	0.699	3545	tags=41%, list=19%, signal=51%
GO_ACTIN_FILAMENT_BUNDLE_ORGANIZATION	155	-0.536955	-1.83425	0	0.00207283	0.699	4187	tags=44%, list=22%, signal=56%
GO_PURINERGIC_NUCLEOTIDE_RECEPTOR_SIGNALING_PATHWAY	32	-0.645159	-1.83403	0	0.00207552	0.699	4348	tags=56%, list=23%, signal=73%
GO_NEGATIVE_REGULATION_OF_INTERLEUKIN_2_PRODUCTION	22	-0.689086	-1.83396	0.0012285	0.00207115	0.699	4052	tags=64%, list=21%, signal=81%
GO_CYTOKINE_PRODUCTION_INVOLVED_IN_IMMUNE_RESPONSE	100	-0.560141	-1.83389	0	0.0020668	0.699	4971	tags=57%, list=26%, signal=77%
GO_REGULATION_OF_CARDIAC_MUSCLE_CELL_DIFFERENTIATION	36	-0.629495	-1.83312	0.00116686	0.00209407	0.701	2677	tags=42%, list=14%, signal=48%
GO_POSITIVE_REGULATION_OF_PHOSPHOLIPASE_ACTIVITY	62	-0.593529	-1.83297	0	0.00208969	0.701	4001	tags=48%, list=21%, signal=61%
GO_REGULATION_OF_MUSCLE_CONTRACTION	161	-0.540726	-1.83189	0	0.0021168	0.707	4680	tags=44%, list=25%, signal=58%
GO_POSITIVE_REGULATION_OF_EPITHELIAL_CELL_APOPTOTIC_PROCESS	32	-0.646449	-1.83143	0	0.00213677	0.711	3604	tags=53%, list=19%, signal=65%
GO_REGULATION_OF_T_CELL_RECEPTOR_SIGNALING_PATHWAY	43	-0.616342	-1.83116	0	0.00213735	0.715	4988	tags=63%, list=26%, signal=85%
GO_MOLTING_CYCLE	106	-0.558941	-1.8274	0	0.00225741	0.741	2693	tags=30%, list=14%, signal=35%
GO_POSITIVE_REGULATION_OF_PHOSPHATIDYLINOSITOL_3_KINASE_SIGNALING	85	-0.567075	-1.82724	0	0.00226476	0.744	3859	tags=48%, list=20%, signal=60%
GO_CAVEOLA	83	-0.57206	-1.82605	0	0.00229358	0.75	3746	tags=40%, list=20%, signal=49%
GO_REGULATION_OF_NEUTROPHIL_CHEMOTAXIS	32	-0.642639	-1.826	0.00118343	0.00228892	0.75	3627	tags=59%, list=19%, signal=73%
GO_ACUTE_PHASE_RESPONSE	47	-0.606208	-1.82588	0	0.00229445	0.751	3988	tags=47%, list=21%, signal=59%
GO_GLOMERULUS_DEVELOPMENT	63	-0.583122	-1.82286	0	0.00243921	0.778	4142	tags=48%, list=22%, signal=61%
GO_REGULATION_OF_MYOBLAST_FUSION	22	-0.673817	-1.82279	0.00119904	0.00243614	0.778	4384	tags=64%, list=23%, signal=83%
GO_REGULATION_OF_NEUTROPHIL_MIGRATION	41	-0.606111	-1.82094	0	0.00249841	0.79	5169	tags=68%, list=27%, signal=94%
GO_NEGATIVE_REGULATION_OF_MUSCLE_CELL_DIFFERENTIATION	54	-0.586366	-1.82089	0	0.0024951	0.79	2764	tags=39%, list=15%, signal=45%
GO_REGULATION_OF_RENAL_SYSTEM_PROCESS	35	-0.629623	-1.82086	0	0.00249347	0.79	3516	tags=43%, list=18%, signal=52%
GO_REGULATION_OF_CALCIUM_ION_TRANSPORT_INTO_CYTOSOL	97	-0.556527	-1.8205	0	0.00251014	0.794	4572	tags=46%, list=24%, signal=61%
GO_DENDRITIC_CELL_CHEMOTAXIS	24	-0.68276	-1.82031	0	0.00251348	0.795	4882	tags=67%, list=26%, signal=90%
GO_NEGATIVE_REGULATION_OF_IMMUNE_EFFECTOR_PROCESS	118	-0.550952	-1.81998	0	0.00252672	0.796	4495	tags=49%, list=24%, signal=64%
GO_REGULATION_OF_TUBE_SIZE	139	-0.54428	-1.81975	0	0.00252833	0.796	3545	tags=40%, list=19%, signal=48%
GO_INTRINSIC_COMPONENT_OF_EXTERNAL_SIDE_OF_PLASMA_MEMBRANE	24	-0.671584	-1.81974	0.00239808	0.0025184	0.796	4090	tags=71%, list=21%, signal=90%
GO_DENDRITIC_CELL_MIGRATION	29	-0.661453	-1.8196	0	0.00252002	0.797	4882	tags=62%, list=26%, signal=83%
GO_EOSINOPHIL_MIGRATION	22	-0.682024	-1.81948	0	0.00251509	0.797	2917	tags=55%, list=15%, signal=64%
GO_CYTOKINE_RECEPTOR_BINDING	266	-0.532816	-1.81869	0	0.00256256	0.804	4285	tags=44%, list=22%, signal=56%
GO_POSITIVE_REGULATION_OF_BLOOD_CIRCULATION	72	-0.573504	-1.81815	0	0.00259021	0.805	4679	tags=50%, list=25%, signal=66%
GO_PRODUCTION_OF_MOLECULAR_MEDIATOR_INVOLVED_IN_INFLAMMATORY_RESPONSE	72	-0.571179	-1.81734	0	0.00261613	0.812	5227	tags=58%, list=27%, signal=80%
GO_CALCIUM_MEDIATED_SIGNALING	218	-0.531008	-1.81725	0	0.00261105	0.812	4882	tags=48%, list=26%, signal=64%
GO_SEMI_LUNAR_VALVE_DEVELOPMENT	37	-0.619237	-1.81719	0	0.0026076	0.813	3761	tags=57%, list=20%, signal=71%
GO_VASCULOGENESIS	80	-0.567786	-1.81689	0	0.00262034	0.817	3533	tags=45%, list=19%, signal=55%
GO_POSITIVE_REGULATION_OF_INTERLEUKIN_8_PRODUCTION	54	-0.585252	-1.81668	0	0.00262173	0.817	5159	tags=57%, list=27%, signal=79%
GO_CYTOKINE_PRODUCTION_INVOLVED_IN_INFLAMMATORY_RESPONSE	49	-0.592841	-1.81623	0	0.00263257	0.818	5227	tags=63%, list=27%, signal=87%
GO_REGULATION_OF_LIPOPOLYSACCHARIDE_MEDIATED_SIGNALING_PATHWAY	25	-0.665264	-1.81619	0.00119474	0.00263072	0.818	4355	tags=60%, list=23%, signal=78%
GO_REGULATION_OF_MUSCLE_SYSTEM_PROCESS	228	-0.526197	-1.81598	0	0.00263854	0.82	3545	tags=36%, list=19%, signal=44%
GO_T_HELPER_17_TYPE_IMMUNE_RESPONSE	30	-0.642967	-1.81552	0	0.00266231	0.824	2170	tags=50%, list=11%, signal=56%
GO_NEGATIVE_REGULATION_OF_SPROUTING_ANGIOGENESIS	27	-0.660266	-1.81535	0.00243605	0.00266174	0.825	3807	tags=59%, list=20%, signal=74%
GO_PEPTIDYL_TYROSINE_MODIFICATION	368	-0.526205	-1.81521	0	0.00266468	0.826	4327	tags=45%, list=23%, signal=57%
GO_NEGATIVE_REGULATION_OF_LYMPHOCYTE_APOPTOTIC_PROCESS	30	-0.647969	-1.81511	0	0.00266598	0.826	3934	tags=57%, list=21%, signal=71%
GO_POSITIVE_REGULATION_OF_REACTIVE_OXYGEN_SPECIES_BIOSYNTHETIC_PROCESS	50	-0.59706	-1.81497	0	0.00266569	0.826	4272	tags=56%, list=22%, signal=72%
GO_RESPONSE_TO_INTERLEUKIN_1	200	-0.528714	-1.81453	0	0.00268056	0.827	2916	tags=35%, list=15%, signal=40%
GO_CELLULAR_RESPONSE_TO_MECHANICAL_STIMULUS	79	-0.563078	-1.81443	0	0.00267866	0.828	2935	tags=38%, list=15%, signal=45%
GO_REGULATION_OF_SYNCYTIUM_FORMATION_BY_PLASMA_MEMBRANE_FUSION	30	-0.640251	-1.81416	0.00114548	0.00269089	0.831	4384	tags=60%, list=23%, signal=78%
GO_PRI_MIRNA_TRANSCRIPTION_BY_RNA_POLYMERASE_II	53	-0.592385	-1.81375	0	0.0027031	0.832	3859	tags=47%, list=20%, signal=59%
GO_POSITIVE_REGULATION_OF_RESPONSE_TO_CYTOKINE_STIMULUS	57	-0.582209	-1.81368	0	0.00269961	0.832	4157	tags=51%, list=22%, signal=65%
GO_POSITIVE_REGULATION_OF_ANTIGEN_RECEPTOR_MEDIATED_SIGNALING_PATHWAY	23	-0.673029	-1.81358	0	0.00270083	0.833	3397	tags=65%, list=18%, signal=79%
GO_CELL_SUBSTRATE_ADHESION	351	-0.520835	-1.81287	0	0.00272854	0.836	4449	tags=43%, list=23%, signal=55%
GO_ACTIVATED_T_CELL_PROLIFERATION	43	-0.610237	-1.81195	0	0.00276861	0.841	4039	tags=56%, list=21%, signal=71%
GO_REACTIVE_OXYGEN_SPECIES_BIOSYNTHETIC_PROCESS	110	-0.549664	-1.81171	0	0.0027697	0.842	4024	tags=45%, list=21%, signal=56%
GO_NEGATIVE_REGULATION_OF_CARDIAC_MUSCLE_TISSUE_GROWTH	25	-0.658974	-1.81045	0	0.00281579	0.851	2941	tags=36%, list=15%, signal=43%
GO_REGULATION_OF_COLLAGEN_METABOLIC_PROCESS	40	-0.611602	-1.81007	0	0.0028431	0.854	5366	tags=68%, list=28%, signal=94%
GO_CELL_SUBSTRATE_JUNCTION_ORGANIZATION	102	-0.549486	-1.80866	0	0.00290738	0.86	2577	tags=29%, list=14%, signal=34%
GO_PLATELET_ALPHA_GRANULE	91	-0.5529	-1.80861	0	0.00290357	0.86	2176	tags=30%, list=11%, signal=33%
GO_POSITIVE_REGULATION_OF_BLOOD_VESSEL_ENDOTHELIAL_CELL_MIGRATION	54	-0.594562	-1.80734	0	0.00293747	0.864	3588	tags=44%, list=19%, signal=55%
GO_REGULATION_OF_MACROPHAGE_MIGRATION	41	-0.609157	-1.80655	0.00113379	0.00296126	0.867	4832	tags=59%, list=25%, signal=78%
GO_P38MAPK_CASCADE	44	-0.602807	-1.80611	0	0.00297881	0.869	3749	tags=50%, list=20%, signal=62%
GO_RETINOL_METABOLIC_PROCESS	47	-0.597973	-1.80601	0	0.0029749	0.869	3791	tags=45%, list=20%, signal=56%
GO_PYRIMIDINE_NUCLEOSIDE_CATABOLIC_PROCESS	23	-0.673992	-1.80594	0	0.00297018	0.869	2351	tags=43%, list=12%, signal=50%
GO_POSITIVE_REGULATION_OF_ACUTE_INFLAMMATORY_RESPONSE	28	-0.629731	-1.80487	0.00115207	0.00304379	0.875	6016	tags=75%, list=32%, signal=109%
GO_POSITIVE_REGULATION_OF_CYTOKINE_BIOSYNTHETIC_PROCESS	36	-0.622858	-1.8038	0.00115207	0.00307216	0.876	5869	tags=75%, list=31%, signal=108%
GO_POSITIVE_REGULATION_OF_ACTIN_FILAMENT_BUNDLE_ASSEMBLY	62	-0.576125	-1.80328	0	0.0030822	0.88	4109	tags=45%, list=22%, signal=57%
GO_NEGATIVE_REGULATION_OF_EPITHELIAL_CELL_DIFFERENTIATION	46	-0.597568	-1.80274	0	0.00308914	0.883	2709	tags=39%, list=14%, signal=46%
GO_POSITIVE_REGULATION_OF_CELL_KILLING	54	-0.591809	-1.80241	0	0.00309862	0.883	4765	tags=57%, list=25%, signal=76%
GO_VASCULAR_ENDOTHELIAL_GROWTH_FACTOR_SIGNALING_PATHWAY	39	-0.607715	-1.80141	0	0.00313389	0.888	4784	tags=59%, list=25%, signal=79%
GO_APOPTOTIC_CELL_CLEARANCE	50	-0.592796	-1.80032	0	0.00318685	0.893	4420	tags=56%, list=23%, signal=73%
GO_REGULATION_OF_CELL_ADHESION_MEDIATED_BY_INTEGRIN	48	-0.595552	-1.80028	0	0.00318267	0.893	4109	tags=65%, list=22%, signal=82%
GO_NEGATIVE_REGULATION_OF_WOUND_HEALING	73	-0.561297	-1.79996	0	0.00318888	0.894	4350	tags=41%, list=23%, signal=53%
GO_GROWTH_FACTOR_ACTIVITY	160	-0.53768	-1.79942	0	0.0032099	0.896	4286	tags=44%, list=22%, signal=56%
GO_INTERLEUKIN_2_PRODUCTION	53	-0.587516	-1.7985	0	0.0032545	0.901	4052	tags=53%, list=21%, signal=67%
GO_ENDOTHELIAL_CELL_APOPTOTIC_PROCESS	54	-0.585648	-1.79805	0.00108932	0.00326514	0.902	2709	tags=39%, list=14%, signal=45%
GO_PROTEIN_COMPLEX_INVOLVED_IN_CELL_ADHESION	36	-0.617664	-1.79791	0	0.00326972	0.904	3716	tags=56%, list=20%, signal=69%
GO_REGULATION_OF_LIPID_KINASE_ACTIVITY	65	-0.579742	-1.79686	0	0.00331981	0.905	3101	tags=45%, list=16%, signal=53%
GO_POSITIVE_REGULATION_OF_PRODUCTION_OF_MOLECULAR_MEDIATOR_OF_IMMUNE_RESPONSE	95	-0.541809	-1.79676	0	0.00332135	0.906	4418	tags=54%, list=23%, signal=70%
GO_CARDIAC_EPITHELIAL_TO_MESENCHYMAL_TRANSITION	31	-0.636602	-1.79653	0	0.00333164	0.906	4918	tags=61%, list=26%, signal=82%
GO_REACTIVE_NITROGEN_SPECIES_METABOLIC_PROCESS	75	-0.557035	-1.79584	0	0.00335942	0.908	4024	tags=44%, list=21%, signal=56%
GO_B_CELL_DIFFERENTIATION	134	-0.533969	-1.79524	0	0.00339291	0.909	5101	tags=51%, list=27%, signal=70%
GO_BONE_REMODELING	90	-0.557931	-1.79495	0	0.00340156	0.91	4063	tags=44%, list=21%, signal=56%
GO_POSITIVE_REGULATION_OF_EPITHELIAL_CELL_PROLIFERATION	190	-0.523613	-1.79468	0	0.00341018	0.91	2996	tags=35%, list=16%, signal=41%
GO_REGULATION_OF_ENDOTHELIAL_CELL_DIFFERENTIATION	34	-0.616402	-1.79462	0	0.00340717	0.911	3859	tags=53%, list=20%, signal=66%
GO_MUSCLE_ADAPTATION	103	-0.544949	-1.79337	0	0.00346946	0.915	3509	tags=38%, list=18%, signal=46%
GO_NATURAL_KILLER_CELL_ACTIVATION	81	-0.556684	-1.79182	0	0.00354735	0.923	4133	tags=44%, list=22%, signal=57%
GO_NEGATIVE_REGULATION_OF_CARDIOCYTE_DIFFERENTIATION	21	-0.672445	-1.79085	0.00123762	0.00360903	0.925	1554	tags=38%, list=8%, signal=41%
GO_REGULATION_OF_VOLTAGE_GATED_CALCIUM_CHANNEL_ACTIVITY	36	-0.613623	-1.79082	0	0.00360425	0.926	3902	tags=44%, list=20%, signal=56%
GO_I_BAND	140	-0.529671	-1.78999	0	0.00366997	0.932	3465	tags=37%, list=18%, signal=45%
GO_NUCLEOTIDE_RECEPTOR_ACTIVITY	21	-0.684674	-1.78873	0	0.00374133	0.936	4097	tags=62%, list=22%, signal=79%
GO_NEGATIVE_REGULATION_OF_B_CELL_ACTIVATION	32	-0.63098	-1.78838	0	0.00376353	0.938	3962	tags=59%, list=21%, signal=75%
GO_REGULATION_OF_CELL_SUBSTRATE_ADHESION	210	-0.525269	-1.78813	0	0.0037785	0.941	3973	tags=40%, list=21%, signal=49%
GO_INTERLEUKIN_17_PRODUCTION	34	-0.620222	-1.78805	0	0.00377492	0.941	4481	tags=59%, list=24%, signal=77%
GO_NEGATIVE_REGULATION_OF_ADAPTIVE_IMMUNE_RESPONSE	46	-0.59437	-1.78759	0.00111111	0.00378126	0.942	4379	tags=57%, list=23%, signal=73%
GO_CELL_DIFFERENTIATION_INVOLVED_IN_KIDNEY_DEVELOPMENT	57	-0.573449	-1.78742	0	0.00379041	0.944	4305	tags=47%, list=23%, signal=61%
GO_REGULATION_OF_MONOCYTE_CHEMOTAXIS	26	-0.648175	-1.78719	0	0.00379389	0.944	2097	tags=42%, list=11%, signal=47%
GO_REGULATION_OF_MAST_CELL_ACTIVATION_INVOLVED_IN_IMMUNE_RESPONSE	33	-0.613239	-1.78678	0.00235294	0.00381211	0.945	4284	tags=55%, list=22%, signal=70%
GO_POSITIVE_REGULATION_OF_LIPASE_ACTIVITY	75	-0.564715	-1.78658	0	0.00381554	0.946	4085	tags=44%, list=21%, signal=56%
GO_AORTIC_VALVE_DEVELOPMENT	32	-0.616201	-1.78624	0.00113636	0.00382879	0.947	3672	tags=56%, list=19%, signal=70%
GO_INTERLEUKIN_12_PRODUCTION	54	-0.581183	-1.78618	0	0.00382378	0.947	4928	tags=59%, list=26%, signal=80%
GO_MESENCHYME_MORPHOGENESIS	52	-0.581014	-1.78614	0	0.0038188	0.947	3970	tags=46%, list=21%, signal=58%
GO_COPULATION	20	-0.674978	-1.78519	0.00122549	0.00387296	0.952	2906	tags=55%, list=15%, signal=65%
GO_REGULATION_OF_PRODUCTION_OF_MOLECULAR_MEDIATOR_OF_IMMUNE_RESPONSE	138	-0.531626	-1.78505	0	0.00387487	0.952	3992	tags=49%, list=21%, signal=61%
GO_BLOOD_VESSEL_ENDOTHELIAL_CELL_PROLIFERATION_INVOLVED_IN_SPROUTING_ANGIOGENESIS	23	-0.650135	-1.78481	0.00376884	0.00388095	0.953	3328	tags=48%, list=17%, signal=58%
GO_PLATELET_ACTIVATION	157	-0.532616	-1.78357	0	0.00394525	0.955	4534	tags=46%, list=24%, signal=60%
GO_POSITIVE_REGULATION_OF_OSSIFICATION	88	-0.545047	-1.78342	0	0.00395118	0.955	3774	tags=45%, list=20%, signal=56%
GO_GLUTATHIONE_PEROXIDASE_ACTIVITY	20	-0.673021	-1.78333	0.00127714	0.00394646	0.955	4801	tags=65%, list=25%, signal=87%
GO_NEGATIVE_REGULATION_OF_CD4_POSITIVE_ALPHA_BETA_T_CELL_ACTIVATION	31	-0.62989	-1.78267	0	0.00397477	0.957	3776	tags=55%, list=20%, signal=68%
GO_ODONTOGENESIS_OF_DENTIN_CONTAINING_TOOTH	90	-0.552931	-1.78088	0	0.00409051	0.96	4679	tags=48%, list=25%, signal=63%
GO_POSITIVE_REGULATION_OF_ENDOTHELIAL_CELL_PROLIFERATION	94	-0.546898	-1.78037	0	0.00412898	0.961	2282	tags=34%, list=12%, signal=38%
GO_GLIAL_CELL_PROLIFERATION	44	-0.595719	-1.78009	0.00113766	0.00413454	0.961	4157	tags=55%, list=22%, signal=70%
GO_TERPENOID_METABOLIC_PROCESS	123	-0.532808	-1.78007	0	0.0041278	0.961	3816	tags=34%, list=20%, signal=42%
GO_LYMPHOCYTE_ACTIVATION_INVOLVED_IN_IMMUNE_RESPONSE	182	-0.522412	-1.77981	0	0.00414017	0.961	3781	tags=43%, list=20%, signal=54%
GO_RENAL_FILTRATION	24	-0.656906	-1.77935	0.00240674	0.00416062	0.962	3846	tags=63%, list=20%, signal=78%
GO_POSITIVE_REGULATION_OF_NITRIC_OXIDE_METABOLIC_PROCESS	40	-0.599498	-1.77903	0.00220994	0.0041783	0.962	4024	tags=52%, list=21%, signal=66%
GO_REGULATION_OF_MUSCLE_CELL_DIFFERENTIATION	152	-0.526473	-1.77891	0	0.00418376	0.963	4552	tags=45%, list=24%, signal=58%
GO_SECOND_MESSENGER_MEDIATED_SIGNALING	452	-0.508195	-1.77821	0	0.00421893	0.965	5007	tags=44%, list=26%, signal=59%
GO_METANEPHRIC_EPITHELIUM_DEVELOPMENT	27	-0.641027	-1.77723	0	0.00428234	0.967	4305	tags=59%, list=23%, signal=76%
GO_POSITIVE_REGULATION_OF_LIPID_LOCALIZATION	92	-0.539811	-1.77699	0	0.00428471	0.968	4085	tags=45%, list=21%, signal=56%
GO_POSITIVE_REGULATION_OF_PHOSPHOLIPID_METABOLIC_PROCESS	50	-0.580168	-1.77676	0	0.00429932	0.969	4384	tags=48%, list=23%, signal=62%
GO_RHO_PROTEIN_SIGNAL_TRANSDUCTION	139	-0.525496	-1.77568	0	0.00437405	0.971	3665	tags=42%, list=19%, signal=52%
GO_SKIN_EPIDERMIS_DEVELOPMENT	90	-0.556556	-1.77413	0	0.00446197	0.975	2693	tags=30%, list=14%, signal=35%
GO_ANTIMICROBIAL_HUMORAL_RESPONSE	132	-0.530429	-1.77371	0	0.00447889	0.975	4276	tags=38%, list=22%, signal=49%
GO_RESPONSE_TO_CORTICOSTEROID	163	-0.524248	-1.773	0	0.00452241	0.975	3263	tags=37%, list=17%, signal=44%
GO_REGULATION_OF_RESPONSE_TO_CYTOKINE_STIMULUS	170	-0.52676	-1.77216	0	0.00458448	0.975	4185	tags=45%, list=22%, signal=58%
GO_CELLULAR_RESPONSE_TO_NUTRIENT	41	-0.594464	-1.77206	0	0.00458518	0.975	1318	tags=34%, list=7%, signal=37%
GO_NEGATIVE_REGULATION_OF_RESPONSE_TO_BIOTIC_STIMULUS	87	-0.548257	-1.77174	0	0.00460975	0.975	5288	tags=53%, list=28%, signal=73%
GO_POSITIVE_REGULATION_OF_B_CELL_PROLIFERATION	41	-0.607219	-1.77147	0	0.00461969	0.975	4285	tags=68%, list=22%, signal=88%
GO_REGULATION_OF_LEUKOCYTE_DEGRANULATION	46	-0.588293	-1.77138	0	0.00462033	0.975	4482	tags=59%, list=24%, signal=77%
GO_POSITIVE_REGULATION_OF_CYTOKINE_PRODUCTION_INVOLVED_IN_IMMUNE_RESPONSE	51	-0.583777	-1.77011	0	0.00471079	0.976	4928	tags=63%, list=26%, signal=84%
GO_NEGATIVE_REGULATION_OF_RESPONSE_TO_WOUNDING	87	-0.544353	-1.76897	0	0.00478113	0.98	4350	tags=41%, list=23%, signal=53%
GO_POSITIVE_REGULATION_OF_CALCIUM_ION_TRANSMEMBRANE_TRANSPORT	70	-0.549868	-1.76889	0	0.00477625	0.98	4158	tags=41%, list=22%, signal=53%
GO_AMYLOID_BETA_BINDING	76	-0.551608	-1.76882	0	0.004774	0.98	5060	tags=55%, list=27%, signal=75%
GO_RESPONSE_TO_TUMOR_NECROSIS_FACTOR	302	-0.509918	-1.76814	0	0.00482593	0.98	4214	tags=40%, list=22%, signal=51%
GO_POSITIVE_REGULATION_OF_EPITHELIAL_CELL_DIFFERENTIATION	62	-0.561958	-1.7677	0	0.00483931	0.98	4920	tags=55%, list=26%, signal=74%
GO_REGULATION_OF_LYMPHOCYTE_CHEMOTAXIS	26	-0.647093	-1.76723	0.00121655	0.00486178	0.98	2957	tags=58%, list=16%, signal=68%
GO_REGULATION_OF_PHOSPHATIDYLINOSITOL_3_KINASE_SIGNALING	121	-0.532877	-1.76709	0	0.00485681	0.98	3859	tags=45%, list=20%, signal=56%
GO_CORNIFICATION	113	-0.540935	-1.76654	0	0.00489486	0.98	4127	tags=35%, list=22%, signal=45%
GO_CELLULAR_RESPONSE_TO_OSMOTIC_STRESS	42	-0.597523	-1.76586	0	0.00493942	0.981	3671	tags=48%, list=19%, signal=59%
GO_REGULATION_OF_VASCULAR_ENDOTHELIAL_GROWTH_FACTOR_RECEPTOR_SIGNALING_PATHWAY	30	-0.619172	-1.7658	0.00117925	0.00493307	0.981	3685	tags=47%, list=19%, signal=58%
GO_PATTERN_RECOGNITION_RECEPTOR_ACTIVITY	23	-0.659783	-1.76571	0.00123609	0.00493709	0.981	5850	tags=78%, list=31%, signal=113%
GO_POSITIVE_REGULATION_OF_T_CELL_MIGRATION	31	-0.62481	-1.76449	0	0.00504182	0.983	4148	tags=58%, list=22%, signal=74%
GO_GLOMERULAR_EPITHELIUM_DEVELOPMENT	23	-0.660053	-1.76414	0.00244798	0.00504436	0.984	1381	tags=35%, list=7%, signal=37%
GO_COLLAGEN_BIOSYNTHETIC_PROCESS	44	-0.583714	-1.76369	0.00111607	0.00506098	0.984	5366	tags=64%, list=28%, signal=88%
GO_OSTEOBLAST_PROLIFERATION	29	-0.628543	-1.76312	0	0.00510707	0.986	4049	tags=48%, list=21%, signal=61%
GO_REGULATION_OF_CELL_SHAPE	155	-0.525576	-1.76257	0	0.00514406	0.986	4311	tags=45%, list=23%, signal=57%
GO_REGULATION_OF_RECEPTOR_SIGNALING_PATHWAY_VIA_STAT	135	-0.520833	-1.76182	0	0.00518196	0.986	4574	tags=42%, list=24%, signal=55%
GO_SEQUESTERING_OF_CALCIUM_ION	120	-0.533409	-1.76114	0	0.00521741	0.986	3782	tags=39%, list=20%, signal=49%
GO_POSITIVE_REGULATION_OF_ADAPTIVE_IMMUNE_RESPONSE	103	-0.538042	-1.76099	0	0.00521712	0.986	3859	tags=49%, list=20%, signal=61%
GO_EPITHELIAL_CELL_APOPTOTIC_PROCESS	101	-0.540258	-1.7606	0	0.00524189	0.986	3627	tags=41%, list=19%, signal=50%
GO_INFLAMMATORY_RESPONSE_TO_ANTIGENIC_STIMULUS	54	-0.567685	-1.76047	0	0.00525803	0.987	5681	tags=54%, list=30%, signal=76%
GO_POSITIVE_REGULATION_OF_LIPID_TRANSPORT	69	-0.554508	-1.76006	0	0.00529054	0.987	4085	tags=43%, list=21%, signal=55%
GO_PHOSPHOLIPASE_C_ACTIVATING_G_PROTEIN_COUPLED_RECEPTOR_SIGNALING_PATHWAY	102	-0.537014	-1.75958	0	0.00532173	0.987	3895	tags=42%, list=20%, signal=53%
GO_RENAL_SYSTEM_PROCESS_INVOLVED_IN_REGULATION_OF_SYSTEMIC_ARTERIAL_BLOOD_PRESSURE	25	-0.641775	-1.7595	0.00116686	0.00532126	0.987	3225	tags=36%, list=17%, signal=43%
GO_EXTRACELLULAR_MATRIX_STRUCTURAL_CONSTITUENT_CONFERRING_COMPRESSION_RESISTANCE	22	-0.648752	-1.75863	0	0.00539887	0.988	3971	tags=50%, list=21%, signal=63%
GO_CALCIUM_ION_TRANSMEMBRANE_IMPORT_INTO_CYTOSOL	136	-0.52462	-1.75859	0	0.00539202	0.988	4620	tags=44%, list=24%, signal=58%
GO_TRIGLYCERIDE_LIPASE_ACTIVITY	29	-0.630447	-1.75831	0	0.00540152	0.988	1636	tags=24%, list=9%, signal=26%
GO_DEFENSE_RESPONSE_TO_FUNGUS	40	-0.598206	-1.75827	0	0.00539468	0.988	5767	tags=55%, list=30%, signal=79%
GO_LIVER_MORPHOGENESIS	21	-0.663939	-1.75731	0	0.00548546	0.988	3837	tags=62%, list=20%, signal=77%
GO_CD4_POSITIVE_ALPHA_BETA_T_CELL_CYTOKINE_PRODUCTION	23	-0.649886	-1.7571	0.00364078	0.00549473	0.988	4481	tags=61%, list=24%, signal=79%
GO_REGULATION_OF_INFLAMMATORY_RESPONSE_TO_ANTIGENIC_STIMULUS	25	-0.6494	-1.75684	0.00120482	0.00550652	0.989	4502	tags=60%, list=24%, signal=78%
GO_DEFENSE_RESPONSE_TO_GRAM_NEGATIVE_BACTERIUM	80	-0.544854	-1.75643	0	0.00552873	0.989	4928	tags=45%, list=26%, signal=60%
GO_POSITIVE_REGULATION_OF_SPROUTING_ANGIOGENESIS	41	-0.590439	-1.75628	0	0.0055317	0.989	3685	tags=44%, list=19%, signal=54%
GO_NEGATIVE_REGULATION_OF_ALPHA_BETA_T_CELL_ACTIVATION	40	-0.601806	-1.75595	0	0.00555449	0.989	3776	tags=50%, list=20%, signal=62%
GO_APOPTOTIC_PROCESS_INVOLVED_IN_MORPHOGENESIS	25	-0.643234	-1.75593	0.00119617	0.00554751	0.989	5028	tags=64%, list=26%, signal=87%
GO_REGULATION_OF_OSSIFICATION	196	-0.51517	-1.75576	0	0.00554796	0.989	3774	tags=41%, list=20%, signal=50%
GO_NEGATIVE_REGULATION_OF_POTASSIUM_ION_TRANSPORT	32	-0.612995	-1.75553	0.00238095	0.00555706	0.989	1881	tags=28%, list=10%, signal=31%
GO_NEGATIVE_REGULATION_OF_CELLULAR_COMPONENT_MOVEMENT	309	-0.509083	-1.75485	0	0.0056217	0.991	3944	tags=41%, list=21%, signal=51%
GO_PLASMA_MEMBRANE_RAFT	114	-0.52587	-1.7546	0	0.00563193	0.991	3746	tags=37%, list=20%, signal=46%
GO_POSITIVE_REGULATION_OF_CELL_ADHESION_MEDIATED_BY_INTEGRIN	21	-0.657029	-1.75438	0.00367197	0.00563256	0.991	3953	tags=71%, list=21%, signal=90%
GO_REGULATION_OF_T_CELL_MEDIATED_CYTOTOXICITY	29	-0.627263	-1.75437	0.00236686	0.00562431	0.991	4727	tags=62%, list=25%, signal=82%
GO_POSITIVE_REGULATION_OF_T_HELPER_CELL_DIFFERENTIATION	21	-0.664981	-1.75425	0.00125	0.00562466	0.991	2170	tags=52%, list=11%, signal=59%
GO_MUSCLE_SYSTEM_PROCESS	432	-0.503145	-1.75378	0	0.0056641	0.992	4593	tags=41%, list=24%, signal=52%
GO_REGULATION_OF_CALCIUM_ION_TRANSPORT	245	-0.512197	-1.75333	0	0.0057022	0.992	4593	tags=41%, list=24%, signal=53%
GO_PEPTIDASE_REGULATOR_ACTIVITY	220	-0.514313	-1.75314	0	0.00571339	0.992	4535	tags=42%, list=24%, signal=55%
GO_POSITIVE_REGULATION_OF_BONE_MINERALIZATION	40	-0.599855	-1.75298	0.00114811	0.005727	0.992	2706	tags=43%, list=14%, signal=49%
GO_REGULATION_OF_METAL_ION_TRANSPORT	380	-0.501431	-1.75146	0	0.00585588	0.993	4593	tags=41%, list=24%, signal=53%
GO_PROXIMAL_DISTAL_PATTERN_FORMATION	33	-0.614406	-1.75136	0	0.00584982	0.993	1374	tags=27%, list=7%, signal=29%
GO_REGULATION_OF_HEART_RATE_BY_CARDIAC_CONDUCTION	39	-0.601039	-1.75122	0	0.00584626	0.993	4056	tags=49%, list=21%, signal=62%
GO_RESPONSE_TO_PROSTAGLANDIN_E	24	-0.651561	-1.75075	0.00119617	0.00587768	0.994	1947	tags=42%, list=10%, signal=46%
GO_POSITIVE_REGULATION_OF_SMOOTH_MUSCLE_CELL_PROLIFERATION	87	-0.54339	-1.75073	0	0.00587163	0.994	3958	tags=40%, list=21%, signal=51%
GO_REGULATION_OF_MYELINATION	44	-0.58375	-1.75048	0.00111235	0.00588603	0.994	3749	tags=43%, list=20%, signal=54%
GO_TUMOR_NECROSIS_FACTOR_BIOSYNTHETIC_PROCESS	35	-0.611243	-1.75022	0.00115473	0.00590399	0.994	5182	tags=63%, list=27%, signal=86%
GO_ADENYLATE_CYCLASE_ACTIVATING_G_PROTEIN_COUPLED_RECEPTOR_SIGNALING_PATHWAY	143	-0.521378	-1.74924	0	0.0059939	0.994	5357	tags=48%, list=28%, signal=67%
GO_LYMPHOCYTE_HOMEOSTASIS	61	-0.557224	-1.74913	0	0.00599847	0.994	4765	tags=54%, list=25%, signal=72%
GO_CHRONIC_INFLAMMATORY_RESPONSE	20	-0.666167	-1.74876	0	0.00602939	0.994	4796	tags=75%, list=25%, signal=100%
GO_CGMP_MEDIATED_SIGNALING	30	-0.616528	-1.74867	0.00463499	0.00603271	0.994	3509	tags=43%, list=18%, signal=53%
GO_NEGATIVE_REGULATION_OF_ERK1_AND_ERK2_CASCADE	70	-0.551405	-1.74775	0	0.00609174	0.995	3328	tags=39%, list=17%, signal=47%
GO_ENSHEATHMENT_OF_NEURONS	135	-0.522447	-1.74731	0	0.00612233	0.995	4024	tags=40%, list=21%, signal=50%
GO_CELL_DIFFERENTIATION_INVOLVED_IN_METANEPHROS_DEVELOPMENT	26	-0.637527	-1.74711	0	0.00612751	0.995	4305	tags=50%, list=23%, signal=65%
GO_POSITIVE_REGULATION_OF_JNK_CASCADE	136	-0.519569	-1.74652	0	0.00616979	0.995	3992	tags=44%, list=21%, signal=55%
GO_POSITIVE_REGULATION_OF_STEROL_TRANSPORT	29	-0.625032	-1.74616	0	0.00619136	0.996	4085	tags=59%, list=21%, signal=75%
GO_STRESS_FIBER_ASSEMBLY	101	-0.530338	-1.74559	0	0.00623333	0.996	3985	tags=41%, list=21%, signal=51%
GO_CYCLIC_NUCLEOTIDE_PHOSPHODIESTERASE_ACTIVITY	25	-0.642338	-1.74548	0.00237248	0.00623514	0.996	2313	tags=40%, list=12%, signal=45%
GO_REGULATION_OF_EPIDERMIS_DEVELOPMENT	89	-0.535222	-1.74528	0	0.00624757	0.996	5378	tags=54%, list=28%, signal=75%
GO_POSITIVE_REGULATION_OF_STRIATED_MUSCLE_CELL_DIFFERENTIATION	59	-0.563163	-1.74518	0	0.00623827	0.996	4495	tags=49%, list=24%, signal=64%
GO_EPITHELIAL_CELL_PROLIFERATION	390	-0.503291	-1.74499	0	0.00625062	0.997	4165	tags=40%, list=22%, signal=50%
GO_MONONUCLEAR_CELL_DIFFERENTIATION	35	-0.600532	-1.74468	0	0.00626758	0.997	3542	tags=51%, list=19%, signal=63%
GO_NEGATIVE_REGULATION_OF_OSTEOBLAST_DIFFERENTIATION	45	-0.588399	-1.74415	0	0.00632421	0.997	3859	tags=49%, list=20%, signal=61%
GO_RESPONSE_TO_RETINOIC_ACID	107	-0.532437	-1.74398	0	0.00633408	0.997	3844	tags=42%, list=20%, signal=52%
GO_RECEPTOR_SIGNALING_PATHWAY_VIA_STAT	158	-0.521204	-1.74382	0	0.00634041	0.997	4574	tags=42%, list=24%, signal=55%
GO_HEART_VALVE_DEVELOPMENT	61	-0.561183	-1.74208	0	0.00651181	0.997	3761	tags=49%, list=20%, signal=61%
GO_POSITIVE_REGULATION_OF_LIPID_KINASE_ACTIVITY	37	-0.604757	-1.74154	0.00114025	0.00656903	0.997	4242	tags=51%, list=22%, signal=66%
GO_COLLAGEN_TRIMER	86	-0.543343	-1.74125	0	0.0065831	0.997	4730	tags=51%, list=25%, signal=68%
GO_RESPONSE_TO_CAMP	93	-0.530889	-1.74062	0	0.00662849	0.997	3987	tags=38%, list=21%, signal=47%
GO_REGULATION_OF_SYSTEMIC_ARTERIAL_BLOOD_PRESSURE_BY_RENIN_ANGIOTENSIN	26	-0.634994	-1.74022	0.00357569	0.00665855	0.997	3225	tags=42%, list=17%, signal=51%
GO_ACTIVATION_OF_CYSTEINE_TYPE_ENDOPEPTIDASE_ACTIVITY_INVOLVED_IN_APOPTOTIC_PROCESS	84	-0.535385	-1.7401	0	0.00666205	0.997	4616	tags=51%, list=24%, signal=67%
GO_MEMBRANE_REGION	343	-0.504569	-1.74007	0	0.00665633	0.997	4384	tags=40%, list=23%, signal=51%
GO_REGULATION_OF_SYSTEMIC_ARTERIAL_BLOOD_PRESSURE	94	-0.534066	-1.74003	0	0.00665064	0.997	4679	tags=39%, list=25%, signal=52%
GO_POSITIVE_REGULATION_OF_PEPTIDASE_ACTIVITY	190	-0.513799	-1.73888	0	0.0067437	0.998	4863	tags=45%, list=26%, signal=59%
GO_REGULATION_OF_CALCIUM_ION_TRANSMEMBRANE_TRANSPORT	146	-0.518648	-1.73842	0	0.00677688	0.998	4240	tags=39%, list=22%, signal=50%
GO_REGULATION_OF_ACTIN_FILAMENT_BASED_PROCESS	392	-0.498628	-1.7384	0	0.00676876	0.998	4172	tags=39%, list=22%, signal=49%
GO_REGULATION_OF_CALCIUM_MEDIATED_SIGNALING	98	-0.530908	-1.73676	0	0.00689612	0.999	4271	tags=43%, list=22%, signal=55%
GO_EXTRACELLULAR_MATRIX_DISASSEMBLY	81	-0.54013	-1.73669	0	0.0068913	0.999	4515	tags=48%, list=24%, signal=63%
GO_CELL_SURFACE_RECEPTOR_SIGNALING_PATHWAY_INVOLVED_IN_HEART_DEVELOPMENT	31	-0.613935	-1.73646	0.00352526	0.00691376	0.999	2593	tags=42%, list=14%, signal=48%
GO_ODONTOGENESIS	130	-0.520798	-1.73629	0	0.00693048	0.999	4705	tags=45%, list=25%, signal=60%
GO_ACTIN_FILAMENT	116	-0.523121	-1.73612	0	0.00694377	0.999	3945	tags=43%, list=21%, signal=54%
GO_POSITIVE_REGULATION_OF_PROTEIN_TYROSINE_KINASE_ACTIVITY	60	-0.552624	-1.73603	0	0.00694681	0.999	3672	tags=42%, list=19%, signal=51%
GO_BONE_RESORPTION	64	-0.549697	-1.73433	0.00107181	0.00709555	0.999	4063	tags=47%, list=21%, signal=59%
GO_CD8_POSITIVE_ALPHA_BETA_T_CELL_ACTIVATION	25	-0.638656	-1.73413	0.00239808	0.00711872	0.999	5056	tags=68%, list=27%, signal=92%
GO_ASTROCYTE_DIFFERENTIATION	78	-0.539468	-1.7339	0	0.00714408	1	4157	tags=45%, list=22%, signal=57%
GO_MUSCLE_CONTRACTION	349	-0.499103	-1.73359	0	0.00716601	1	4701	tags=41%, list=25%, signal=54%
GO_LEUKOTRIENE_METABOLIC_PROCESS	33	-0.610876	-1.73359	0	0.00715639	1	4191	tags=45%, list=22%, signal=58%
GO_KERATINOCYTE_PROLIFERATION	45	-0.575905	-1.73234	0	0.00725485	1	3645	tags=47%, list=19%, signal=58%
GO_REGULATION_OF_MEMBRANE_REPOLARIZATION	33	-0.603062	-1.73202	0	0.00728882	1	4248	tags=52%, list=22%, signal=66%
GO_REGULATION_OF_ACTIN_FILAMENT_ORGANIZATION	270	-0.502806	-1.732	0	0.00728243	1	4172	tags=40%, list=22%, signal=50%
GO_POSITIVE_REGULATION_OF_T_CELL_MEDIATED_IMMUNITY	44	-0.577507	-1.73189	0.00330761	0.00728612	1	3776	tags=48%, list=20%, signal=59%
GO_NEGATIVE_REGULATION_OF_PEPTIDASE_ACTIVITY	249	-0.500881	-1.73131	0	0.00732802	1	4515	tags=39%, list=24%, signal=51%
GO_POSITIVE_REGULATION_OF_CYSTEINE_TYPE_ENDOPEPTIDASE_ACTIVITY	147	-0.513938	-1.73035	0	0.00743279	1	4863	tags=47%, list=26%, signal=63%
GO_REGULATION_OF_PHOSPHOLIPID_METABOLIC_PROCESS	91	-0.535954	-1.73033	0	0.00742627	1	3249	tags=37%, list=17%, signal=45%
GO_INOSITOL_PHOSPHATE_MEDIATED_SIGNALING	57	-0.551292	-1.73013	0	0.00743531	1	2961	tags=33%, list=16%, signal=39%
GO_NEGATIVE_REGULATION_OF_T_CELL_DIFFERENTIATION	44	-0.57511	-1.73012	0.00110375	0.00742768	1	3776	tags=48%, list=20%, signal=59%
GO_POSITIVE_REGULATION_OF_BIOMINERALIZATION	48	-0.568663	-1.73012	0	0.00741787	1	2706	tags=40%, list=14%, signal=46%
GO_BLOOD_VESSEL_REMODELING	40	-0.590894	-1.73003	0	0.00741692	1	4158	tags=55%, list=22%, signal=70%
GO_FAT_CELL_DIFFERENTIATION	224	-0.50639	-1.73001	0	0.0073996	1	3957	tags=41%, list=21%, signal=51%
GO_REGULATION_OF_RUFFLE_ASSEMBLY	30	-0.618708	-1.72984	0.00235571	0.00740972	1	3159	tags=43%, list=17%, signal=52%
GO_MACROPHAGE_DIFFERENTIATION	43	-0.573517	-1.72976	0.00111483	0.00741429	1	3378	tags=44%, list=18%, signal=54%
GO_EXTRACELLULAR_MATRIX_BINDING	57	-0.559121	-1.72959	0	0.00742436	1	3294	tags=40%, list=17%, signal=49%
GO_POSITIVE_REGULATION_OF_MUSCLE_CELL_DIFFERENTIATION	88	-0.537482	-1.72898	0	0.00746834	1	4495	tags=44%, list=24%, signal=58%
GO_TRANSMEMBRANE_RECEPTOR_PROTEIN_KINASE_ACTIVITY	80	-0.542076	-1.72892	0.00104493	0.00746733	1	3588	tags=40%, list=19%, signal=49%
GO_POSITIVE_REGULATION_OF_RESPONSE_TO_WOUNDING	67	-0.540284	-1.72881	0.00106724	0.00747398	1	4240	tags=46%, list=22%, signal=59%
GO_PLATELET_ALPHA_GRANULE_LUMEN	67	-0.55188	-1.72869	0.00105374	0.00747407	1	3761	tags=40%, list=20%, signal=50%
GO_GLIAL_CELL_DEVELOPMENT	113	-0.518335	-1.72856	0	0.00746878	1	4166	tags=41%, list=22%, signal=52%
GO_REGULATION_OF_T_HELPER_CELL_DIFFERENTIATION	35	-0.606555	-1.72761	0	0.00756436	1	3776	tags=57%, list=20%, signal=71%
GO_REGULATION_OF_CARDIAC_MUSCLE_TISSUE_DEVELOPMENT	80	-0.544243	-1.72753	0	0.00755669	1	3374	tags=36%, list=18%, signal=44%
GO_SIGNALING_RECEPTOR_COMPLEX_ADAPTOR_ACTIVITY	41	-0.582009	-1.72751	0.00229095	0.00755019	1	2697	tags=44%, list=14%, signal=51%
GO_PROSTANOID_BIOSYNTHETIC_PROCESS	28	-0.6282	-1.72747	0.00118765	0.00754693	1	4859	tags=68%, list=26%, signal=91%
GO_ICOSANOID_BIOSYNTHETIC_PROCESS	55	-0.569959	-1.72736	0	0.00755552	1	4562	tags=49%, list=24%, signal=64%
GO_RUFFLE_ORGANIZATION	56	-0.558495	-1.7265	0	0.00763727	1	3595	tags=41%, list=19%, signal=50%
GO_REGULATION_OF_MONONUCLEAR_CELL_MIGRATION	51	-0.563742	-1.72646	0	0.00763285	1	2557	tags=37%, list=13%, signal=43%
GO_DIGESTIVE_SYSTEM_DEVELOPMENT	137	-0.51115	-1.72627	0	0.00764563	1	2932	tags=35%, list=15%, signal=41%
GO_FIBROBLAST_MIGRATION	45	-0.580509	-1.72505	0.00221976	0.00777947	1	1918	tags=33%, list=10%, signal=37%
GO_NEGATIVE_REGULATION_OF_CELL_SUBSTRATE_ADHESION	62	-0.548166	-1.72464	0	0.00780877	1	3840	tags=47%, list=20%, signal=58%
GO_MUSCLE_CELL_MIGRATION	81	-0.540717	-1.72428	0	0.00784794	1	3774	tags=41%, list=20%, signal=51%
GO_GLIOGENESIS	291	-0.50034	-1.72383	0	0.00789445	1	4166	tags=38%, list=22%, signal=48%
GO_MYELOID_LEUKOCYTE_DIFFERENTIATION	204	-0.504794	-1.72308	0	0.00799092	1	5182	tags=50%, list=27%, signal=67%
GO_REGULATION_OF_BONE_REMODELING	50	-0.566686	-1.72291	0	0.00800099	1	4031	tags=50%, list=21%, signal=63%
GO_ENDOTHELIAL_CELL_DEVELOPMENT	64	-0.550873	-1.72283	0	0.0080036	1	3380	tags=39%, list=18%, signal=47%
GO_PLATELET_DEGRANULATION	128	-0.518805	-1.72238	0	0.0080261	1	2176	tags=27%, list=11%, signal=31%
GO_NEGATIVE_REGULATION_OF_TISSUE_REMODELING	22	-0.648041	-1.72232	0.00123609	0.00800797	1	3563	tags=50%, list=19%, signal=61%
GO_REGULATION_OF_ACTIN_CYTOSKELETON_REORGANIZATION	39	-0.589079	-1.72188	0.00230415	0.00803415	1	4804	tags=54%, list=25%, signal=72%
GO_RESPIRATORY_BURST	35	-0.603846	-1.72125	0	0.00806516	1	6141	tags=66%, list=32%, signal=97%
GO_METANEPHRIC_NEPHRON_EPITHELIUM_DEVELOPMENT	23	-0.639446	-1.72101	0.00369458	0.00809696	1	4305	tags=57%, list=23%, signal=73%
GO_BASEMENT_MEMBRANE_ORGANIZATION	30	-0.603661	-1.7207	0.00348028	0.00811927	1	4012	tags=43%, list=21%, signal=55%
GO_POSITIVE_REGULATION_OF_CELL_MATRIX_ADHESION	54	-0.563388	-1.72009	0	0.0081823	1	4214	tags=46%, list=22%, signal=59%
GO_POSITIVE_REGULATION_OF_MYOTUBE_DIFFERENTIATION	33	-0.600886	-1.71965	0	0.00822739	1	4449	tags=52%, list=23%, signal=67%
GO_REGULATION_OF_RHO_PROTEIN_SIGNAL_TRANSDUCTION	85	-0.534883	-1.71925	0	0.00824435	1	3665	tags=44%, list=19%, signal=54%
GO_ENDOTHELIAL_CELL_CHEMOTAXIS	28	-0.613949	-1.71915	0	0.00824346	1	3886	tags=46%, list=20%, signal=58%
GO_REGULATION_OF_HOMOTYPIC_CELL_CELL_ADHESION	30	-0.619536	-1.719	0	0.0082488	1	4185	tags=57%, list=22%, signal=73%
GO_POSITIVE_REGULATION_OF_CHOLESTEROL_EFFLUX	20	-0.661246	-1.71875	0.00248447	0.00825946	1	4085	tags=70%, list=21%, signal=89%
GO_SMOOTH_MUSCLE_CELL_MIGRATION	68	-0.546133	-1.71859	0	0.00825973	1	3774	tags=40%, list=20%, signal=49%
GO_TISSUE_REGENERATION	73	-0.534176	-1.71853	0.0010582	0.00825987	1	4677	tags=48%, list=25%, signal=63%
GO_PRODUCTION_OF_MOLECULAR_MEDIATOR_OF_IMMUNE_RESPONSE	212	-0.49952	-1.7181	0	0.00829509	1	4285	tags=47%, list=22%, signal=60%
GO_OVULATION_CYCLE	69	-0.548715	-1.71795	0	0.00830338	1	3940	tags=42%, list=21%, signal=53%
GO_POSITIVE_REGULATION_OF_INTERLEUKIN_4_PRODUCTION	23	-0.633457	-1.71776	0.00364964	0.00830149	1	3949	tags=61%, list=21%, signal=77%
GO_REGULATION_OF_PEPTIDASE_ACTIVITY	435	-0.491467	-1.71735	0	0.00834249	1	4893	tags=41%, list=26%, signal=54%
GO_PHOSPHATIDYLINOSITOL_3_KINASE_SIGNALING	148	-0.512911	-1.71672	0	0.00838032	1	3940	tags=43%, list=21%, signal=53%
GO_RENAL_SYSTEM_PROCESS	124	-0.514255	-1.71656	0	0.0083895	1	3867	tags=35%, list=20%, signal=44%
GO_POSITIVE_REGULATION_OF_LEUKOCYTE_MEDIATED_IMMUNITY	131	-0.509203	-1.7161	0	0.00840968	1	4484	tags=50%, list=24%, signal=65%
GO_LONG_TERM_MEMORY	34	-0.598045	-1.71601	0.00227015	0.00840659	1	2357	tags=35%, list=12%, signal=40%
GO_NEGATIVE_REGULATION_OF_RESPONSE_TO_CYTOKINE_STIMULUS	61	-0.545308	-1.71559	0	0.00843894	1	4355	tags=49%, list=23%, signal=64%
GO_REGULATION_OF_PROTEIN_TYROSINE_KINASE_ACTIVITY	93	-0.523844	-1.71539	0	0.00844796	1	3717	tags=42%, list=20%, signal=52%
GO_VASCULAR_ENDOTHELIAL_GROWTH_FACTOR_RECEPTOR_SIGNALING_PATHWAY	93	-0.529226	-1.71506	0	0.00847099	1	3685	tags=40%, list=19%, signal=49%
GO_NEGATIVE_REGULATION_OF_SECRETION	180	-0.504272	-1.71477	0	0.00849003	1	5316	tags=48%, list=28%, signal=66%
GO_SODIUM_CHANNEL_REGULATOR_ACTIVITY	37	-0.590841	-1.71476	0.00229095	0.00848184	1	2774	tags=32%, list=15%, signal=38%
GO_POSITIVE_REGULATION_OF_ALCOHOL_BIOSYNTHETIC_PROCESS	26	-0.623678	-1.71425	0.00467836	0.00852795	1	3969	tags=58%, list=21%, signal=73%
GO_CHEMOATTRACTANT_ACTIVITY	35	-0.59486	-1.71383	0.00232019	0.00856896	1	2282	tags=29%, list=12%, signal=32%
GO_EXTRINSIC_COMPONENT_OF_CYTOPLASMIC_SIDE_OF_PLASMA_MEMBRANE	98	-0.522454	-1.71365	0	0.00858276	1	3921	tags=42%, list=21%, signal=52%
GO_NON_MEMBRANE_SPANNING_PROTEIN_TYROSINE_KINASE_ACTIVITY	46	-0.574929	-1.71276	0	0.0086649	1	4037	tags=52%, list=21%, signal=66%
GO_NEGATIVE_REGULATION_OF_EPITHELIAL_CELL_PROLIFERATION	127	-0.513817	-1.71195	0	0.00874645	1	3859	tags=40%, list=20%, signal=50%
GO_DESMOSOME	25	-0.619995	-1.71175	0.00120627	0.00875795	1	2949	tags=36%, list=15%, signal=43%
GO_PHAGOCYTIC_CUP	27	-0.615801	-1.71137	0.00121065	0.00880319	1	2946	tags=48%, list=15%, signal=57%
GO_HEART_GROWTH	90	-0.527315	-1.71102	0	0.00881999	1	4547	tags=44%, list=24%, signal=58%
GO_SERINE_HYDROLASE_ACTIVITY	182	-0.501912	-1.71014	0	0.00892535	1	4011	tags=35%, list=21%, signal=43%
GO_PEPTIDE_RECEPTOR_ACTIVITY	149	-0.509737	-1.70997	0	0.00893754	1	3730	tags=36%, list=20%, signal=44%
GO_REGULATION_OF_CELL_MIGRATION_INVOLVED_IN_SPROUTING_ANGIOGENESIS	38	-0.579969	-1.70928	0.00225225	0.00901982	1	5837	tags=68%, list=31%, signal=98%
GO_CELLULAR_RESPONSE_TO_VITAMIN	30	-0.611803	-1.70927	0	0.0090092	1	1318	tags=40%, list=7%, signal=43%
GO_NEGATIVE_REGULATION_OF_T_CELL_RECEPTOR_SIGNALING_PATHWAY	23	-0.641468	-1.70894	0.00243605	0.00902365	1	3801	tags=57%, list=20%, signal=71%
GO_NEGATIVE_REGULATION_OF_COLD_INDUCED_THERMOGENESIS	47	-0.568391	-1.70878	0	0.00901721	1	2009	tags=30%, list=11%, signal=33%
GO_CYCLIC_NUCLEOTIDE_MEDIATED_SIGNALING	220	-0.5038	-1.70875	0	0.00901254	1	5357	tags=47%, list=28%, signal=64%
GO_REGULATION_OF_MYELOID_LEUKOCYTE_DIFFERENTIATION	118	-0.511894	-1.70851	0	0.00902938	1	5531	tags=53%, list=29%, signal=74%
GO_REGULATION_OF_LIPOPROTEIN_LIPASE_ACTIVITY	22	-0.641188	-1.70818	0.00248756	0.00906866	1	1533	tags=27%, list=8%, signal=30%
GO_ENDOCRINE_PROCESS	83	-0.533945	-1.70802	0.00104167	0.00907763	1	3618	tags=39%, list=19%, signal=47%
GO_ACTIN_FILAMENT_ORGANIZATION	425	-0.489194	-1.70785	0	0.00908753	1	4250	tags=40%, list=22%, signal=50%
GO_EMBRYONIC_DIGESTIVE_TRACT_DEVELOPMENT	34	-0.601667	-1.70764	0.00229358	0.00910325	1	3859	tags=50%, list=20%, signal=63%
GO_NEGATIVE_REGULATION_OF_LYMPHOCYTE_DIFFERENTIATION	53	-0.563112	-1.7074	0	0.00912473	1	3776	tags=43%, list=20%, signal=54%
GO_REGULATION_OF_VASCULAR_PERMEABILITY	44	-0.567803	-1.70739	0.00112108	0.00911511	1	2195	tags=36%, list=12%, signal=41%
GO_REGULATION_OF_EPITHELIAL_CELL_DIFFERENTIATION	150	-0.509698	-1.70699	0	0.00916077	1	4920	tags=49%, list=26%, signal=66%
GO_REGULATION_OF_CALCIUM_ION_TRANSMEMBRANE_TRANSPORTER_ACTIVITY	87	-0.521342	-1.70685	0	0.00917248	1	3902	tags=36%, list=20%, signal=45%
GO_REGULATION_OF_URINE_VOLUME	22	-0.646233	-1.70635	0.00123153	0.0092364	1	4679	tags=59%, list=25%, signal=78%
GO_REGULATION_OF_HAIR_CYCLE	29	-0.612796	-1.70575	0	0.00929422	1	2282	tags=31%, list=12%, signal=35%
GO_REGULATION_OF_SENSORY_PERCEPTION	38	-0.577656	-1.70565	0.00231481	0.00929218	1	2652	tags=34%, list=14%, signal=40%
GO_KERATINIZATION	138	-0.511398	-1.70559	0	0.00929403	1	4360	tags=32%, list=23%, signal=41%
GO_NEGATIVE_REGULATION_OF_PEPTIDE_SECRETION	96	-0.518663	-1.70478	0	0.00940537	1	4802	tags=48%, list=25%, signal=64%
GO_INOSITOL_LIPID_MEDIATED_SIGNALING	188	-0.499484	-1.70459	0	0.00941574	1	4103	tags=41%, list=22%, signal=52%
GO_NEGATIVE_REGULATION_OF_BLOOD_VESSEL_DIAMETER	83	-0.527122	-1.70441	0	0.00942989	1	4882	tags=46%, list=26%, signal=61%
GO_PROTEIN_KINASE_B_SIGNALING	247	-0.493394	-1.70332	0	0.00956334	1	4286	tags=40%, list=22%, signal=51%
GO_REGULATION_OF_RELEASE_OF_SEQUESTERED_CALCIUM_ION_INTO_CYTOSOL	77	-0.536233	-1.70307	0.00104712	0.00957536	1	4571	tags=45%, list=24%, signal=60%
GO_POSITIVE_REGULATION_OF_STRESS_ACTIVATED_PROTEIN_KINASE_SIGNALING_CASCADE	165	-0.505096	-1.70138	0	0.00972475	1	5010	tags=51%, list=26%, signal=68%
GO_NEGATIVE_REGULATION_OF_LEUKOCYTE_DIFFERENTIATION	100	-0.514924	-1.70131	0	0.009727	1	5556	tags=56%, list=29%, signal=79%
GO_REGULATION_OF_B_CELL_DIFFERENTIATION	27	-0.615383	-1.70107	0.00353357	0.00975008	1	5101	tags=70%, list=27%, signal=96%
GO_REGULATION_OF_BMP_SIGNALING_PATHWAY	89	-0.522226	-1.69992	0.00104384	0.0098629	1	4640	tags=45%, list=24%, signal=59%
GO_REGULATION_OF_HEART_GROWTH	66	-0.539738	-1.69971	0	0.0098838	1	3374	tags=36%, list=18%, signal=44%
GO_G_PROTEIN_COUPLED_RECEPTOR_SIGNALING_PATHWAY_COUPLED_TO_CYCLIC_NUCLEOTIDE_SECOND_MESSENGER	257	-0.495421	-1.69834	0	0.0100578	1	5465	tags=46%, list=29%, signal=63%
GO_SUPEROXIDE_METABOLIC_PROCESS	69	-0.536585	-1.69733	0	0.0101841	1	4696	tags=49%, list=25%, signal=65%
GO_SKELETAL_MUSCLE_ORGAN_DEVELOPMENT	166	-0.501113	-1.69684	0	0.0102465	1	3969	tags=38%, list=21%, signal=48%
GO_REGULATION_OF_PLATELET_AGGREGATION	21	-0.655186	-1.69682	0	0.0102398	1	4185	tags=62%, list=22%, signal=79%
GO_POSITIVE_REGULATION_OF_RHO_PROTEIN_SIGNAL_TRANSDUCTION	32	-0.588168	-1.69649	0.00350877	0.0102611	1	3665	tags=50%, list=19%, signal=62%
GO_MUSCLE_ORGAN_DEVELOPMENT	379	-0.489941	-1.69593	0	0.0103362	1	3478	tags=34%, list=18%, signal=41%
GO_PRIMARY_ALCOHOL_METABOLIC_PROCESS	94	-0.522576	-1.69571	0	0.0103573	1	3791	tags=35%, list=20%, signal=44%
GO_RESPONSE_TO_INTERFERON_BETA	30	-0.597009	-1.69568	0.00117096	0.0103468	1	4946	tags=63%, list=26%, signal=85%
GO_GLIAL_CELL_DIFFERENTIATION	219	-0.495561	-1.69559	0	0.0103464	1	4166	tags=37%, list=22%, signal=47%
GO_LIPID_DROPLET	93	-0.522622	-1.69505	0	0.0104171	1	2662	tags=28%, list=14%, signal=32%
GO_REGULATION_OF_T_HELPER_17_TYPE_IMMUNE_RESPONSE	21	-0.642663	-1.69444	0.00363196	0.0105073	1	2170	tags=52%, list=11%, signal=59%
GO_POSITIVE_REGULATION_OF_WOUND_HEALING	57	-0.541931	-1.69413	0	0.0105419	1	3095	tags=37%, list=16%, signal=44%
GO_NEGATIVE_REGULATION_OF_PEPTIDYL_TYROSINE_PHOSPHORYLATION	51	-0.556292	-1.69361	0	0.0105934	1	4311	tags=51%, list=23%, signal=66%
GO_NEGATIVE_REGULATION_OF_CHEMOTAXIS	58	-0.545759	-1.69343	0	0.0106039	1	5730	tags=62%, list=30%, signal=88%
GO_ISOPRENOID_BINDING	37	-0.577257	-1.69234	0.00342075	0.0107415	1	4415	tags=46%, list=23%, signal=60%
GO_CONTRACTILE_FIBER	236	-0.491852	-1.69206	0	0.0107683	1	3466	tags=33%, list=18%, signal=40%
GO_CELL_FATE_DETERMINATION	41	-0.561936	-1.69174	0.00109409	0.0108087	1	4677	tags=49%, list=25%, signal=65%
GO_ENDOPEPTIDASE_REGULATOR_ACTIVITY	185	-0.497206	-1.69163	0	0.010807	1	4535	tags=39%, list=24%, signal=51%
GO_BROWN_FAT_CELL_DIFFERENTIATION	50	-0.557023	-1.69112	0	0.0108857	1	3740	tags=42%, list=20%, signal=52%
GO_POSITIVE_REGULATION_OF_BLOOD_VESSEL_DIAMETER	58	-0.540708	-1.69056	0.00110497	0.0109423	1	3509	tags=38%, list=18%, signal=46%
GO_POSITIVE_REGULATION_OF_CALCIUM_ION_TRANSPORT_INTO_CYTOSOL	54	-0.545882	-1.69053	0	0.0109367	1	4158	tags=43%, list=22%, signal=54%
GO_CD4_POSITIVE_OR_CD8_POSITIVE_ALPHA_BETA_T_CELL_LINEAGE_COMMITMENT	22	-0.64461	-1.68965	0.0049505	0.0110761	1	3776	tags=59%, list=20%, signal=74%
GO_HETEROTYPIC_CELL_CELL_ADHESION	61	-0.540979	-1.68956	0.00108108	0.0110804	1	3967	tags=43%, list=21%, signal=54%
GO_RESPONSE_TO_MECHANICAL_STIMULUS	209	-0.495537	-1.68945	0	0.011092	1	3817	tags=36%, list=20%, signal=45%
GO_RESPONSE_TO_FLUID_SHEAR_STRESS	33	-0.589263	-1.68918	0.00352113	0.0111263	1	3580	tags=48%, list=19%, signal=60%
GO_PHOSPHOTYROSINE_RESIDUE_BINDING	42	-0.567987	-1.68882	0.00225479	0.0111668	1	4501	tags=50%, list=24%, signal=65%
GO_INFLAMMATORY_CELL_APOPTOTIC_PROCESS	22	-0.641718	-1.68826	0.00361882	0.0112471	1	3992	tags=64%, list=21%, signal=80%
GO_REGULATION_OF_LIPID_LOCALIZATION	149	-0.501819	-1.68748	0	0.0113508	1	4085	tags=39%, list=21%, signal=49%
GO_POSITIVE_REGULATION_OF_T_CELL_MEDIATED_CYTOTOXICITY	22	-0.634684	-1.6874	0.00371287	0.0113575	1	2813	tags=45%, list=15%, signal=53%
GO_ARTERY_MORPHOGENESIS	63	-0.536322	-1.68715	0.00214823	0.0113841	1	4491	tags=54%, list=24%, signal=70%
GO_NEGATIVE_REGULATION_OF_LIPID_STORAGE	21	-0.63282	-1.68605	0.00125	0.0115308	1	4085	tags=62%, list=21%, signal=79%
GO_NOTOCHORD_DEVELOPMENT	20	-0.640498	-1.68552	0.00873908	0.0116048	1	3672	tags=60%, list=19%, signal=74%
GO_RETINOIC_ACID_METABOLIC_PROCESS	33	-0.584303	-1.68548	0.00470035	0.0115977	1	5704	tags=52%, list=30%, signal=73%
GO_NEGATIVE_REGULATION_OF_MUSCLE_HYPERTROPHY	28	-0.605126	-1.68523	0.00934579	0.0116167	1	3380	tags=39%, list=18%, signal=48%
GO_CYTOSOLIC_CALCIUM_ION_TRANSPORT	174	-0.498354	-1.68499	0	0.0116339	1	4620	tags=41%, list=24%, signal=54%
GO_INTERFERON_GAMMA_MEDIATED_SIGNALING_PATHWAY	73	-0.530917	-1.68445	0	0.0116959	1	3607	tags=42%, list=19%, signal=52%
GO_POSITIVE_REGULATION_OF_OSTEOBLAST_DIFFERENTIATION	60	-0.545103	-1.68427	0.00110619	0.0117174	1	3774	tags=45%, list=20%, signal=56%
GO_EXOGENOUS_PROTEIN_BINDING	74	-0.527585	-1.68388	0	0.0117692	1	4341	tags=47%, list=23%, signal=61%
GO_IMMUNOLOGICAL_SYNAPSE	39	-0.575291	-1.68381	0	0.0117647	1	3023	tags=44%, list=16%, signal=52%
GO_GLIAL_CELL_MIGRATION	53	-0.54939	-1.68298	0.00108342	0.0118749	1	2361	tags=34%, list=12%, signal=39%
GO_POSITIVE_REGULATION_OF_LEUKOCYTE_APOPTOTIC_PROCESS	29	-0.608101	-1.68246	0.00465116	0.0119566	1	3677	tags=55%, list=19%, signal=68%
GO_POSITIVE_REGULATION_OF_GRANULOCYTE_CHEMOTAXIS	29	-0.599775	-1.68197	0.00119332	0.0120163	1	4593	tags=62%, list=24%, signal=82%
GO_POSITIVE_REGULATION_OF_CALCIUM_ION_TRANSPORT	120	-0.503183	-1.68186	0	0.0120151	1	4903	tags=43%, list=26%, signal=57%
GO_PROTEIN_CONTAINING_COMPLEX_REMODELING	32	-0.583552	-1.68169	0.0022779	0.0120281	1	1860	tags=28%, list=10%, signal=31%
GO_TEMPERATURE_HOMEOSTASIS	174	-0.494724	-1.68129	0	0.0120615	1	4401	tags=41%, list=23%, signal=53%
GO_TRABECULA_MORPHOGENESIS	48	-0.551445	-1.68034	0.00110742	0.0122272	1	4634	tags=48%, list=24%, signal=63%
GO_SERINE_TYPE_ENDOPEPTIDASE_INHIBITOR_ACTIVITY	96	-0.51898	-1.68004	0	0.0122662	1	5350	tags=43%, list=28%, signal=59%
GO_REGULATION_OF_BONE_MINERALIZATION	75	-0.520749	-1.67971	0.0010627	0.0122768	1	2930	tags=36%, list=15%, signal=42%
GO_NEUROTROPHIN_TRK_RECEPTOR_SIGNALING_PATHWAY	33	-0.578342	-1.67841	0.00230415	0.0124708	1	2306	tags=33%, list=12%, signal=38%
GO_PROSTANOID_METABOLIC_PROCESS	47	-0.551726	-1.67739	0	0.0125983	1	4562	tags=51%, list=24%, signal=67%
GO_TISSUE_HOMEOSTASIS	261	-0.488158	-1.67692	0	0.0126591	1	4077	tags=38%, list=21%, signal=48%
GO_CORNIFIED_ENVELOPE	45	-0.564331	-1.67676	0.00220751	0.012673	1	6484	tags=62%, list=34%, signal=94%
GO_NEGATIVE_REGULATION_OF_SMOOTH_MUSCLE_CELL_MIGRATION	22	-0.625406	-1.67662	0.00742574	0.0126841	1	2940	tags=50%, list=15%, signal=59%
GO_SPHINGOLIPID_BINDING	24	-0.614633	-1.67612	0.00718563	0.0127439	1	3665	tags=54%, list=19%, signal=67%
GO_PROGRAMMED_NECROTIC_CELL_DEATH	41	-0.570093	-1.67579	0	0.0127826	1	4158	tags=51%, list=22%, signal=65%
GO_NEGATIVE_REGULATION_OF_OSSIFICATION	74	-0.523463	-1.67573	0.00104167	0.0127841	1	4882	tags=47%, list=26%, signal=63%
GO_POSITIVE_REGULATION_OF_PROTEIN_KINASE_B_SIGNALING	166	-0.494585	-1.67563	0	0.0127891	1	4356	tags=42%, list=23%, signal=53%
GO_SALIVARY_GLAND_DEVELOPMENT	37	-0.577117	-1.6756	0.00685714	0.0127802	1	3859	tags=49%, list=20%, signal=61%
GO_REGULATION_OF_GLIOGENESIS	115	-0.506797	-1.67546	0	0.0127738	1	4894	tags=44%, list=26%, signal=59%
GO_REGULATION_OF_REACTIVE_OXYGEN_SPECIES_METABOLIC_PROCESS	180	-0.498729	-1.67514	0	0.0128112	1	4359	tags=42%, list=23%, signal=54%
GO_POSITIVE_REGULATION_OF_LIPID_METABOLIC_PROCESS	149	-0.498351	-1.67477	0	0.0128814	1	4384	tags=41%, list=23%, signal=53%
GO_PHOSPHOLIPASE_C_ACTIVITY	28	-0.591846	-1.67471	0.0034965	0.0128734	1	3233	tags=43%, list=17%, signal=52%
GO_RESPONSE_TO_KETONE	197	-0.49275	-1.67462	0	0.0128773	1	3056	tags=34%, list=16%, signal=39%
GO_POSITIVE_REGULATION_OF_CALCIUM_ION_TRANSMEMBRANE_TRANSPORTER_ACTIVITY	39	-0.559159	-1.67409	0.00343249	0.0129558	1	3902	tags=38%, list=20%, signal=48%
GO_REGULATION_OF_ASTROCYTE_DIFFERENTIATION	27	-0.604862	-1.67399	0.00359712	0.0129473	1	2128	tags=33%, list=11%, signal=37%
GO_NEGATIVE_REGULATION_OF_ENDOTHELIAL_CELL_APOPTOTIC_PROCESS	29	-0.601185	-1.67328	0.00596659	0.0130387	1	2709	tags=41%, list=14%, signal=48%
GO_TRANSMEMBRANE_RECEPTOR_PROTEIN_TYROSINE_KINASE_ACTIVITY	61	-0.534793	-1.67245	0	0.0131682	1	3588	tags=39%, list=19%, signal=48%
GO_REGULATION_OF_CYSTEINE_TYPE_ENDOPEPTIDASE_ACTIVITY	231	-0.485046	-1.67223	0	0.0131948	1	4863	tags=42%, list=26%, signal=56%
GO_CELLULAR_RESPONSE_TO_CORTICOSTEROID_STIMULUS	61	-0.542282	-1.67205	0	0.0132036	1	3056	tags=38%, list=16%, signal=45%
GO_REGULATION_OF_LIPID_STORAGE	50	-0.546468	-1.67199	0.00218341	0.0131995	1	4085	tags=50%, list=21%, signal=63%
GO_EPIDERMIS_DEVELOPMENT	387	-0.48293	-1.67175	0	0.0132319	1	4372	tags=35%, list=23%, signal=44%
GO_NEPHRON_DEVELOPMENT	142	-0.501178	-1.67173	0	0.0132219	1	4551	tags=46%, list=24%, signal=60%
GO_POSITIVE_REGULATION_OF_INTERLEUKIN_12_PRODUCTION	34	-0.587431	-1.67067	0	0.0133845	1	3921	tags=56%, list=21%, signal=70%
GO_REGULATION_OF_CELLULAR_RESPONSE_TO_GROWTH_FACTOR_STIMULUS	275	-0.484135	-1.67034	0	0.0134385	1	4142	tags=37%, list=22%, signal=46%
GO_CELL_CELL_JUNCTION	490	-0.475683	-1.67003	0	0.013468	1	3842	tags=33%, list=20%, signal=40%
GO_MATING	41	-0.564026	-1.66942	0.00566893	0.0135606	1	5546	tags=49%, list=29%, signal=69%
GO_REGULATION_OF_VASCULAR_ASSOCIATED_SMOOTH_MUSCLE_CELL_PROLIFERATION	51	-0.550009	-1.66936	0.00111483	0.0135553	1	4846	tags=45%, list=25%, signal=60%
GO_POSITIVE_REGULATION_OF_ION_TRANSMEMBRANE_TRANSPORT	157	-0.496319	-1.66928	0	0.0135569	1	4516	tags=41%, list=24%, signal=53%
GO_REGULATION_OF_GLIAL_CELL_DIFFERENTIATION	68	-0.52834	-1.66908	0	0.013575	1	3730	tags=35%, list=20%, signal=44%
GO_REGULATION_OF_PATTERN_RECOGNITION_RECEPTOR_SIGNALING_PATHWAY	93	-0.519221	-1.66903	0	0.0135706	1	3682	tags=41%, list=19%, signal=50%
GO_REGULATION_OF_MUSCLE_HYPERTROPHY	57	-0.53919	-1.66846	0.00107991	0.0136322	1	3380	tags=37%, list=18%, signal=45%
GO_NEUROPEPTIDE_RECEPTOR_BINDING	32	-0.582967	-1.66814	0.00688073	0.0136635	1	5316	tags=53%, list=28%, signal=74%
GO_I_KAPPAB_KINASE_NF_KAPPAB_SIGNALING	277	-0.484405	-1.66799	0	0.0136732	1	4009	tags=40%, list=21%, signal=50%
GO_REGULATION_OF_CARDIAC_MUSCLE_CONTRACTION_BY_REGULATION_OF_THE_RELEASE_OF_SEQUESTERED_CALCIUM_ION	20	-0.627786	-1.66798	0.00760456	0.0136604	1	4571	tags=50%, list=24%, signal=66%
GO_SODIUM_ION_HOMEOSTASIS	52	-0.533322	-1.66775	0.00327511	0.0136934	1	2732	tags=25%, list=14%, signal=29%
GO_REGULATION_OF_CARDIAC_MUSCLE_CELL_MEMBRANE_REPOLARIZATION	26	-0.609855	-1.66752	0.00470035	0.0137273	1	4248	tags=58%, list=22%, signal=74%
GO_REGULATION_OF_NIK_NF_KAPPAB_SIGNALING	107	-0.50716	-1.66736	0	0.013741	1	4203	tags=42%, list=22%, signal=54%
GO_POSITIVE_REGULATION_OF_INTERLEUKIN_2_PRODUCTION	26	-0.607496	-1.66734	0.00243013	0.0137308	1	5612	tags=77%, list=29%, signal=109%
GO_CELLULAR_RESPONSE_TO_FATTY_ACID	55	-0.532431	-1.66694	0	0.0137744	1	2123	tags=35%, list=11%, signal=39%
GO_POSITIVE_REGULATION_OF_MACROPHAGE_ACTIVATION	25	-0.605545	-1.66687	0.00487805	0.0137741	1	6111	tags=80%, list=32%, signal=118%
GO_HOMOTYPIC_CELL_CELL_ADHESION	86	-0.520404	-1.66679	0.00105152	0.0137737	1	5680	tags=55%, list=30%, signal=78%
GO_POSITIVE_REGULATION_OF_TOLL_LIKE_RECEPTOR_SIGNALING_PATHWAY	24	-0.61804	-1.66611	0.00485437	0.0138954	1	3682	tags=46%, list=19%, signal=57%
GO_COLLAGEN_CATABOLIC_PROCESS	47	-0.546565	-1.66602	0.00221976	0.0138966	1	6713	tags=68%, list=35%, signal=105%
GO_REGULATION_OF_HEART_MORPHOGENESIS	40	-0.569351	-1.66596	0.00339367	0.0138928	1	4700	tags=50%, list=25%, signal=66%
GO_POSITIVE_REGULATION_OF_NEUTROPHIL_MIGRATION	31	-0.589781	-1.66576	0.00228311	0.0139244	1	5169	tags=68%, list=27%, signal=93%
GO_CARDIAC_ATRIUM_MORPHOGENESIS	29	-0.58923	-1.66561	0.00486618	0.0139403	1	4700	tags=52%, list=25%, signal=69%
GO_BONE_MINERALIZATION	115	-0.499755	-1.66541	0	0.013957	1	2706	tags=31%, list=14%, signal=36%
GO_FAT_SOLUBLE_VITAMIN_METABOLIC_PROCESS	45	-0.549874	-1.66492	0.00543478	0.0140287	1	5913	tags=62%, list=31%, signal=90%
GO_STORE_OPERATED_CALCIUM_ENTRY	20	-0.6259	-1.66339	0.00248756	0.0142941	1	3802	tags=45%, list=20%, signal=56%
GO_POSITIVE_REGULATION_OF_STRESS_FIBER_ASSEMBLY	52	-0.537632	-1.6633	0.00221484	0.0142662	1	3985	tags=40%, list=21%, signal=51%
GO_POSITIVE_REGULATION_OF_SYNAPTIC_TRANSMISSION_GLUTAMATERGIC	32	-0.584058	-1.66326	0.00344432	0.0142597	1	3295	tags=34%, list=17%, signal=41%
GO_REGULATION_OF_MUSCLE_ADAPTATION	80	-0.524456	-1.66294	0	0.014293	1	3380	tags=35%, list=18%, signal=42%
GO_NEGATIVE_REGULATION_OF_REACTIVE_OXYGEN_SPECIES_BIOSYNTHETIC_PROCESS	30	-0.593911	-1.6623	0.00591017	0.0144026	1	2361	tags=33%, list=12%, signal=38%
GO_POSITIVE_REGULATION_OF_NIK_NF_KAPPAB_SIGNALING	79	-0.516892	-1.66084	0.00104822	0.0146438	1	5621	tags=54%, list=30%, signal=77%
GO_RESPONSE_TO_ORGANOPHOSPHORUS	133	-0.496329	-1.66067	0	0.014658	1	3987	tags=35%, list=21%, signal=44%
GO_NEGATIVE_REGULATION_OF_CD4_POSITIVE_ALPHA_BETA_T_CELL_DIFFERENTIATION	21	-0.621243	-1.66065	0.00972054	0.0146495	1	4284	tags=62%, list=22%, signal=80%
GO_NEGATIVE_REGULATION_OF_T_CELL_PROLIFERATION	61	-0.537265	-1.66042	0.00213675	0.014664	1	4052	tags=48%, list=21%, signal=60%
GO_REGULATION_OF_ACTOMYOSIN_STRUCTURE_ORGANIZATION	95	-0.509877	-1.6604	0	0.0146523	1	3985	tags=39%, list=21%, signal=49%
GO_CELL_MATRIX_ADHESION	223	-0.48607	-1.66016	0	0.0146905	1	4449	tags=39%, list=23%, signal=51%
GO_MYOFIBRIL_ASSEMBLY	64	-0.530158	-1.66009	0	0.0146901	1	3087	tags=36%, list=16%, signal=43%
GO_MYELOID_CELL_APOPTOTIC_PROCESS	33	-0.575896	-1.65972	0.00350467	0.0147675	1	3992	tags=45%, list=21%, signal=57%
GO_FIBRONECTIN_BINDING	27	-0.605164	-1.65966	0.00606796	0.0147726	1	3294	tags=41%, list=17%, signal=49%
GO_T_CELL_RECEPTOR_SIGNALING_PATHWAY	189	-0.48818	-1.6595	0	0.0147929	1	3824	tags=39%, list=20%, signal=48%
GO_CELLULAR_RESPONSE_TO_COPPER_ION	27	-0.59787	-1.65947	0.0104408	0.0147844	1	2267	tags=30%, list=12%, signal=34%
GO_ADAPTIVE_THERMOGENESIS	155	-0.49064	-1.65944	0	0.0147806	1	4401	tags=41%, list=23%, signal=52%
GO_CELLULAR_RESPONSE_TO_AMYLOID_BETA	38	-0.559788	-1.65891	0.00452489	0.0148594	1	2532	tags=34%, list=13%, signal=39%
GO_MUSCLE_HYPERTROPHY	85	-0.515157	-1.65736	0	0.015169	1	3509	tags=35%, list=18%, signal=43%
GO_REGULATION_OF_FIBROBLAST_GROWTH_FACTOR_RECEPTOR_SIGNALING_PATHWAY	31	-0.578202	-1.65725	0.00688863	0.0151856	1	2577	tags=32%, list=14%, signal=37%
GO_NEURAL_CREST_CELL_DIFFERENTIATION	88	-0.510026	-1.65709	0	0.015207	1	5631	tags=55%, list=30%, signal=77%
GO_POSITIVE_REGULATION_OF_MYELOID_LEUKOCYTE_DIFFERENTIATION	56	-0.532232	-1.65656	0.0010846	0.0153031	1	5028	tags=46%, list=26%, signal=63%
GO_ANGIOGENESIS_INVOLVED_IN_WOUND_HEALING	25	-0.603623	-1.65606	0.00932401	0.0153756	1	2195	tags=40%, list=12%, signal=45%
GO_REGULATION_OF_STEROL_TRANSPORT	54	-0.535593	-1.65573	0	0.0154154	1	4085	tags=39%, list=21%, signal=49%
GO_RENAL_SODIUM_EXCRETION	23	-0.617119	-1.65571	0.00614251	0.0154072	1	2732	tags=35%, list=14%, signal=41%
GO_SARCOMERE_ORGANIZATION	42	-0.549286	-1.65568	0.00455581	0.0153974	1	3049	tags=38%, list=16%, signal=45%
GO_NEGATIVE_REGULATION_OF_CALCIUM_ION_TRANSPORT	57	-0.528156	-1.65534	0	0.0154378	1	4727	tags=42%, list=25%, signal=56%
GO_SKELETAL_MUSCLE_TISSUE_REGENERATION	40	-0.558616	-1.65457	0.00342075	0.0155828	1	4677	tags=52%, list=25%, signal=69%
GO_NEGATIVE_REGULATION_OF_MAP_KINASE_ACTIVITY	75	-0.518325	-1.6545	0.00105374	0.0155878	1	3682	tags=37%, list=19%, signal=46%
GO_REACTIVE_OXYGEN_SPECIES_METABOLIC_PROCESS	265	-0.481587	-1.65369	0	0.0157015	1	4378	tags=39%, list=23%, signal=50%
GO_OUTFLOW_TRACT_MORPHOGENESIS	76	-0.516562	-1.65361	0	0.0157056	1	4491	tags=43%, list=24%, signal=57%
GO_NEPHRON_EPITHELIUM_DEVELOPMENT	110	-0.49634	-1.65335	0	0.0157287	1	4551	tags=45%, list=24%, signal=59%
GO_PLATELET_AGGREGATION	62	-0.534517	-1.65318	0	0.0157492	1	4185	tags=45%, list=22%, signal=58%
GO_LYSOSOME_LOCALIZATION	75	-0.519002	-1.65302	0.00106157	0.0157767	1	4284	tags=45%, list=22%, signal=58%
GO_REGULATION_OF_CATION_TRANSMEMBRANE_TRANSPORT	336	-0.47461	-1.65287	0	0.0157909	1	4614	tags=38%, list=24%, signal=49%
GO_EXOCRINE_SYSTEM_DEVELOPMENT	48	-0.551921	-1.65266	0	0.0158206	1	3859	tags=46%, list=20%, signal=57%
GO_PLATELET_DENSE_GRANULE	21	-0.638744	-1.6524	0.00245098	0.0158581	1	922	tags=24%, list=5%, signal=25%
GO_RESPONSE_TO_AMYLOID_BETA	48	-0.549867	-1.652	0.00219539	0.015915	1	4364	tags=46%, list=23%, signal=59%
GO_NECROTIC_CELL_DEATH	50	-0.536427	-1.65142	0	0.0159925	1	4158	tags=48%, list=22%, signal=61%
GO_REGULATION_OF_MACROPHAGE_DERIVED_FOAM_CELL_DIFFERENTIATION	31	-0.585105	-1.65123	0.00470035	0.016011	1	4085	tags=52%, list=21%, signal=66%
GO_REGULATION_OF_STRESS_ACTIVATED_PROTEIN_KINASE_SIGNALING_CASCADE	230	-0.482232	-1.65122	0	0.0159993	1	4009	tags=40%, list=21%, signal=50%
GO_PLATELET_DERIVED_GROWTH_FACTOR_RECEPTOR_SIGNALING_PATHWAY	56	-0.542238	-1.65083	0	0.0160586	1	3737	tags=43%, list=20%, signal=53%
GO_REGULATION_OF_ORGAN_GROWTH	95	-0.507646	-1.65034	0	0.0161415	1	2941	tags=32%, list=15%, signal=37%
GO_NEGATIVE_REGULATION_OF_CALCIUM_ION_TRANSMEMBRANE_TRANSPORT	36	-0.560592	-1.64994	0.00568828	0.0162183	1	3649	tags=39%, list=19%, signal=48%
GO_REGULATION_OF_STRIATED_MUSCLE_CONTRACTION	91	-0.501001	-1.64968	0	0.0162619	1	6392	tags=52%, list=34%, signal=77%
GO_MEMBRANE_REPOLARIZATION	44	-0.553069	-1.64911	0.00109529	0.0163646	1	4248	tags=48%, list=22%, signal=61%
GO_REGULATION_OF_HEART_RATE	98	-0.50352	-1.64864	0	0.0164351	1	4913	tags=42%, list=26%, signal=56%
GO_CYCLIC_NUCLEOTIDE_METABOLIC_PROCESS	40	-0.558772	-1.64794	0.00450958	0.0165948	1	3867	tags=38%, list=20%, signal=47%
GO_MYOTUBE_DIFFERENTIATION	106	-0.501309	-1.64741	0	0.0166922	1	4486	tags=44%, list=24%, signal=58%
GO_REGULATION_OF_POSITIVE_CHEMOTAXIS	26	-0.596961	-1.64624	0.00722892	0.0168731	1	4341	tags=50%, list=23%, signal=65%
GO_CARBOHYDRATE_BINDING	263	-0.473689	-1.64595	0	0.0169202	1	4210	tags=38%, list=22%, signal=48%
GO_OVULATION	21	-0.628313	-1.64588	0.00609013	0.01692	1	3909	tags=52%, list=21%, signal=66%
GO_PROTEIN_TYROSINE_KINASE_BINDING	98	-0.510116	-1.6458	0.00102459	0.0169214	1	4327	tags=44%, list=23%, signal=56%
GO_ACTIN_FILAMENT_BINDING	206	-0.475275	-1.64566	0	0.0169387	1	4537	tags=38%, list=24%, signal=50%
GO_T_CELL_CHEMOTAXIS	27	-0.588028	-1.6448	0.00358852	0.0171144	1	2936	tags=44%, list=15%, signal=52%
GO_REGENERATION	189	-0.482912	-1.64467	0	0.017127	1	4679	tags=43%, list=25%, signal=57%
GO_INOSITOL_PHOSPHATE_BIOSYNTHETIC_PROCESS	28	-0.601262	-1.6446	0.00591017	0.0171289	1	3689	tags=50%, list=19%, signal=62%
GO_REGULATION_OF_CELLULAR_RESPONSE_TO_VASCULAR_ENDOTHELIAL_GROWTH_FACTOR_STIMULUS	22	-0.617546	-1.64457	0.00844391	0.0171195	1	2576	tags=45%, list=14%, signal=53%
GO_NUCLEOSIDE_CATABOLIC_PROCESS	32	-0.57315	-1.64447	0.00694444	0.0171192	1	3929	tags=47%, list=21%, signal=59%
GO_REGULATION_OF_BIOMINERALIZATION	93	-0.50642	-1.64442	0	0.0170997	1	2706	tags=33%, list=14%, signal=39%
GO_NEGATIVE_REGULATION_OF_CYTOKINE_PRODUCTION_INVOLVED_IN_IMMUNE_RESPONSE	23	-0.609005	-1.64392	0.00858896	0.0171814	1	6000	tags=70%, list=31%, signal=101%
GO_NEGATIVE_REGULATION_OF_INTERFERON_GAMMA_PRODUCTION	35	-0.570515	-1.64357	0.00229095	0.0172299	1	5736	tags=63%, list=30%, signal=90%
GO_POSITIVE_REGULATION_OF_COLD_INDUCED_THERMOGENESIS	97	-0.503118	-1.64293	0	0.0173561	1	4634	tags=46%, list=24%, signal=61%
GO_NITRIC_OXIDE_SYNTHASE_BIOSYNTHETIC_PROCESS	20	-0.627332	-1.64254	0.00749064	0.0174321	1	1541	tags=35%, list=8%, signal=38%
GO_NEURON_PROJECTION_REGENERATION	54	-0.537054	-1.64237	0.00220264	0.0174488	1	4240	tags=44%, list=22%, signal=57%
GO_EXTRACELLULAR_MATRIX_STRUCTURAL_CONSTITUENT_CONFERRING_TENSILE_STRENGTH	41	-0.554129	-1.64217	0.00568828	0.0174887	1	4730	tags=54%, list=25%, signal=71%
GO_MYOBLAST_FUSION	43	-0.555506	-1.64186	0.00331492	0.0175292	1	4486	tags=47%, list=24%, signal=61%
GO_METANEPHRIC_NEPHRON_DEVELOPMENT	40	-0.560685	-1.64153	0.00112486	0.0175757	1	2858	tags=35%, list=15%, signal=41%
GO_BASAL_PART_OF_CELL	69	-0.518439	-1.64148	0.00211193	0.0175719	1	5055	tags=43%, list=27%, signal=59%
GO_GLYCOLIPID_BINDING	25	-0.600679	-1.64144	0.00361446	0.0175682	1	2273	tags=32%, list=12%, signal=36%
GO_SKIN_DEVELOPMENT	336	-0.471658	-1.64121	0	0.0175936	1	4372	tags=34%, list=23%, signal=43%
GO_REGULATION_OF_EPITHELIAL_TO_MESENCHYMAL_TRANSITION	89	-0.508116	-1.64008	0	0.0177753	1	3942	tags=40%, list=21%, signal=51%
GO_SUBSTRATE_ADHESION_DEPENDENT_CELL_SPREADING	106	-0.501681	-1.63993	0	0.0177915	1	4012	tags=39%, list=21%, signal=49%
GO_SLEEP	34	-0.564882	-1.63987	0.00232288	0.0177898	1	3482	tags=41%, list=18%, signal=50%
GO_CELL_RECOGNITION	169	-0.487032	-1.63982	0	0.0177852	1	2659	tags=30%, list=14%, signal=34%
GO_POSITIVE_REGULATION_OF_LYMPHOCYTE_CHEMOTAXIS	21	-0.614967	-1.63895	0.00759494	0.0179548	1	4148	tags=62%, list=22%, signal=79%
GO_LIPOPOLYSACCHARIDE_BINDING	33	-0.572525	-1.6388	0.00710059	0.017973	1	5060	tags=48%, list=27%, signal=66%
GO_RESPONSE_TO_ALCOHOL	229	-0.476472	-1.63872	0	0.0179712	1	4261	tags=37%, list=22%, signal=47%
GO_POSITIVE_REGULATION_OF_SUPRAMOLECULAR_FIBER_ORGANIZATION	204	-0.483468	-1.63859	0	0.0179856	1	4166	tags=36%, list=22%, signal=46%
GO_COMPLEMENT_BINDING	21	-0.630414	-1.63859	0.00628931	0.0179698	1	4763	tags=62%, list=25%, signal=82%
GO_OXIDOREDUCTASE_ACTIVITY_ACTING_ON_PEROXIDE_AS_ACCEPTOR	55	-0.527409	-1.63853	0.00441989	0.0179665	1	4922	tags=45%, list=26%, signal=61%
GO_RUFFLE_MEMBRANE	95	-0.504212	-1.63816	0	0.018033	1	3699	tags=35%, list=19%, signal=43%
GO_NEGATIVE_REGULATION_OF_ION_TRANSPORT	144	-0.486315	-1.63784	0	0.0180921	1	4593	tags=36%, list=24%, signal=47%
GO_RESPONSE_TO_NITRIC_OXIDE	20	-0.621084	-1.63742	0.00625	0.0181731	1	1850	tags=35%, list=10%, signal=39%
GO_STRUCTURAL_CONSTITUENT_OF_MUSCLE	43	-0.54837	-1.63704	0.00690449	0.0182429	1	3860	tags=44%, list=20%, signal=55%
GO_REGULATION_OF_CHOLESTEROL_EFFLUX	30	-0.584356	-1.63644	0.00361446	0.0183661	1	4085	tags=50%, list=21%, signal=64%
GO_PROTEIN_ACTIVATION_CASCADE	27	-0.59098	-1.63622	0.00719425	0.0184167	1	2893	tags=33%, list=15%, signal=39%
GO_POSITIVE_REGULATION_OF_CALCIUM_MEDIATED_SIGNALING	43	-0.54725	-1.63615	0.00110742	0.0184145	1	4271	tags=44%, list=22%, signal=57%
GO_FOAM_CELL_DIFFERENTIATION	37	-0.556025	-1.63612	0.00344432	0.0184051	1	5680	tags=59%, list=30%, signal=85%
GO_ENDOCYTIC_VESICLE_LUMEN	20	-0.630221	-1.63558	0.00873908	0.0185226	1	1795	tags=35%, list=9%, signal=39%
GO_VASCULAR_ASSOCIATED_SMOOTH_MUSCLE_CELL_DIFFERENTIATION	25	-0.606439	-1.63445	0.00851581	0.0187461	1	4703	tags=60%, list=25%, signal=80%
GO_PROTEIN_TYROSINE_KINASE_ACTIVITY	135	-0.488813	-1.6341	0	0.0188245	1	4037	tags=40%, list=21%, signal=50%
GO_POSITIVE_REGULATION_OF_TUMOR_NECROSIS_FACTOR_BIOSYNTHETIC_PROCESS	24	-0.604726	-1.63376	0.00731707	0.0188903	1	5869	tags=71%, list=31%, signal=102%
GO_REGULATION_OF_KERATINOCYTE_PROLIFERATION	34	-0.57545	-1.6332	0.00563698	0.0189989	1	3627	tags=47%, list=19%, signal=58%
GO_PROTEOGLYCAN_BINDING	36	-0.574183	-1.63243	0.00343643	0.0191647	1	4341	tags=50%, list=23%, signal=65%
GO_SYNCYTIUM_FORMATION	57	-0.530588	-1.6322	0.00109769	0.0192003	1	4696	tags=47%, list=25%, signal=63%
GO_INTERLEUKIN_6_MEDIATED_SIGNALING_PATHWAY	22	-0.61334	-1.63215	0.0138191	0.0191967	1	3591	tags=45%, list=19%, signal=56%
GO_REGULATION_OF_LAMELLIPODIUM_ORGANIZATION	47	-0.53807	-1.63197	0.00222717	0.0192265	1	2860	tags=30%, list=15%, signal=35%
GO_STRESS_ACTIVATED_PROTEIN_KINASE_SIGNALING_CASCADE	290	-0.471924	-1.63183	0	0.0192395	1	4009	tags=38%, list=21%, signal=47%
GO_CARDIAC_ATRIUM_DEVELOPMENT	35	-0.563135	-1.63122	0.00344828	0.0193726	1	4700	tags=51%, list=25%, signal=68%
GO_POSITIVE_REGULATION_OF_I_KAPPAB_KINASE_NF_KAPPAB_SIGNALING	186	-0.481161	-1.63016	0	0.0196048	1	4009	tags=39%, list=21%, signal=49%
GO_CELL_CELL_ADHESION_VIA_PLASMA_MEMBRANE_ADHESION_MOLECULES	274	-0.475566	-1.63001	0	0.0196282	1	4713	tags=38%, list=25%, signal=49%
GO_POSITIVE_REGULATION_OF_DEFENSE_RESPONSE	363	-0.467527	-1.62987	0	0.0196423	1	4861	tags=43%, list=26%, signal=56%
GO_REGULATION_OF_CELL_MATRIX_ADHESION	119	-0.489437	-1.62978	0.00103413	0.0196359	1	4214	tags=39%, list=22%, signal=49%
GO_ANCHORED_COMPONENT_OF_PLASMA_MEMBRANE	60	-0.521683	-1.62956	0.00425532	0.0196758	1	4301	tags=42%, list=23%, signal=54%
GO_ACYLGLYCEROL_HOMEOSTASIS	34	-0.572877	-1.62923	0.00231214	0.0197181	1	2636	tags=35%, list=14%, signal=41%
GO_B_CELL_HOMEOSTASIS	28	-0.5885	-1.62913	0.00477897	0.0197292	1	4572	tags=57%, list=24%, signal=75%
GO_KERATIN_FILAMENT	36	-0.568401	-1.62884	0.00115207	0.0197882	1	3406	tags=31%, list=18%, signal=37%
GO_DECIDUALIZATION	25	-0.598376	-1.62861	0.00611995	0.0198221	1	2902	tags=32%, list=15%, signal=38%
GO_TRABECULA_FORMATION	25	-0.603531	-1.62831	0.00473373	0.019876	1	2130	tags=32%, list=11%, signal=36%
GO_HETEROPHILIC_CELL_CELL_ADHESION_VIA_PLASMA_MEMBRANE_CELL_ADHESION_MOLECULES	47	-0.535189	-1.62764	0.00447928	0.0200069	1	3738	tags=38%, list=20%, signal=48%
GO_REGULATION_OF_SUBSTRATE_ADHESION_DEPENDENT_CELL_SPREADING	53	-0.535864	-1.62735	0.00217865	0.0200484	1	3874	tags=38%, list=20%, signal=47%
GO_POSITIVE_REGULATION_OF_SMALL_MOLECULE_METABOLIC_PROCESS	145	-0.486598	-1.62698	0	0.0201232	1	4887	tags=41%, list=26%, signal=55%
GO_ACUTE_INFLAMMATORY_RESPONSE_TO_ANTIGENIC_STIMULUS	22	-0.616151	-1.62595	0.0074813	0.0203802	1	4502	tags=55%, list=24%, signal=71%
GO_SULFUR_COMPOUND_BINDING	260	-0.474109	-1.6252	0	0.0205637	1	5213	tags=42%, list=27%, signal=56%
GO_MESENCHYMAL_CELL_PROLIFERATION	44	-0.545846	-1.62516	0.00558659	0.0205562	1	3816	tags=48%, list=20%, signal=60%
GO_POSITIVE_REGULATION_OF_LYMPHOCYTE_MEDIATED_IMMUNITY	99	-0.500192	-1.62471	0	0.0206489	1	4811	tags=53%, list=25%, signal=70%
GO_NATURAL_KILLER_CELL_DIFFERENTIATION	22	-0.6118	-1.62453	0.00735294	0.0206739	1	3940	tags=50%, list=21%, signal=63%
GO_OSTEOBLAST_DIFFERENTIATION	214	-0.473531	-1.62448	0	0.0206713	1	3968	tags=38%, list=21%, signal=47%
GO_INTERLEUKIN_4_PRODUCTION	32	-0.573234	-1.62421	0.00347625	0.0207066	1	3949	tags=53%, list=21%, signal=67%
GO_STRUCTURAL_CONSTITUENT_OF_CYTOSKELETON	102	-0.495021	-1.62384	0	0.0207773	1	3420	tags=33%, list=18%, signal=40%
GO_COAGULATION	342	-0.469313	-1.62365	0	0.0208057	1	4534	tags=36%, list=24%, signal=46%
GO_PULMONARY_VALVE_DEVELOPMENT	21	-0.616449	-1.62304	0.0135802	0.0209395	1	3761	tags=52%, list=20%, signal=65%
GO_REGULATION_OF_PLATELET_DERIVED_GROWTH_FACTOR_RECEPTOR_SIGNALING_PATHWAY	23	-0.605531	-1.62303	0.0122549	0.0209226	1	3368	tags=39%, list=18%, signal=47%
GO_T_CELL_LINEAGE_COMMITMENT	28	-0.575964	-1.62291	0.00475624	0.020929	1	3776	tags=50%, list=20%, signal=62%
GO_MUSCLE_FILAMENT_SLIDING	39	-0.547565	-1.62279	0.00566251	0.0209381	1	3691	tags=36%, list=19%, signal=44%
GO_NEGATIVE_REGULATION_OF_CATION_CHANNEL_ACTIVITY	43	-0.542139	-1.62242	0.0055371	0.021004	1	4593	tags=42%, list=24%, signal=55%
GO_HOMEOSTASIS_OF_NUMBER_OF_CELLS_WITHIN_A_TISSUE	29	-0.573377	-1.62145	0.00238663	0.0212243	1	4158	tags=48%, list=22%, signal=62%
GO_POSITIVE_REGULATION_OF_P38MAPK_CASCADE	26	-0.596273	-1.62072	0.00962696	0.0213263	1	5329	tags=69%, list=28%, signal=96%
GO_POSITIVE_REGULATION_OF_SMALL_GTPASE_MEDIATED_SIGNAL_TRANSDUCTION	77	-0.504428	-1.62048	0.0021322	0.0213486	1	3665	tags=40%, list=19%, signal=50%
GO_NEGATIVE_REGULATION_OF_CARTILAGE_DEVELOPMENT	28	-0.566766	-1.62033	0.0106888	0.0213831	1	4568	tags=54%, list=24%, signal=70%
GO_IMMUNOGLOBULIN_BINDING	24	-0.597996	-1.61999	0.0129564	0.0214688	1	3910	tags=42%, list=21%, signal=52%
GO_POSITIVE_REGULATION_OF_NATURAL_KILLER_CELL_MEDIATED_IMMUNITY	25	-0.601092	-1.61992	0.00608273	0.0214725	1	4765	tags=64%, list=25%, signal=85%
GO_JNK_CASCADE	211	-0.475346	-1.61992	0	0.0214575	1	4009	tags=38%, list=21%, signal=48%
GO_MEMBRANE_DEPOLARIZATION_DURING_ACTION_POTENTIAL	36	-0.554507	-1.61914	0.00813008	0.0216118	1	3115	tags=42%, list=16%, signal=50%
GO_SARCOLEMMA	135	-0.480643	-1.61902	0	0.0216244	1	4321	tags=37%, list=23%, signal=48%
GO_ANIMAL_ORGAN_FORMATION	63	-0.518584	-1.61883	0.00541712	0.0216646	1	1521	tags=24%, list=8%, signal=26%
GO_REGULATION_OF_BLOOD_CIRCULATION	287	-0.468536	-1.61742	0	0.0220397	1	4679	tags=37%, list=25%, signal=48%
GO_ASTROCYTE_DEVELOPMENT	41	-0.55198	-1.61738	0.00330396	0.0220319	1	4157	tags=51%, list=22%, signal=65%
GO_NEGATIVE_REGULATION_OF_TOLL_LIKE_RECEPTOR_SIGNALING_PATHWAY	39	-0.547776	-1.61738	0.00570776	0.0220144	1	4928	tags=59%, list=26%, signal=79%
GO_POSITIVE_REGULATION_OF_EPIDERMIS_DEVELOPMENT	42	-0.542175	-1.61704	0.00466744	0.0220602	1	4920	tags=52%, list=26%, signal=70%
GO_PHOSPHATIDYLINOSITOL_3_KINASE_REGULATOR_ACTIVITY	20	-0.621298	-1.61624	0.00739827	0.0222209	1	3580	tags=60%, list=19%, signal=74%
GO_BASAL_PLASMA_MEMBRANE	51	-0.52555	-1.61596	0.00111235	0.0222788	1	5666	tags=51%, list=30%, signal=72%
GO_MORPHOGENESIS_OF_A_BRANCHING_STRUCTURE	194	-0.472814	-1.61594	0	0.0222667	1	4008	tags=37%, list=21%, signal=47%
GO_POSITIVE_REGULATION_OF_OLIGODENDROCYTE_DIFFERENTIATION	22	-0.601089	-1.6155	0.0074813	0.0223766	1	3730	tags=41%, list=20%, signal=51%
GO_REGULATION_OF_T_CELL_CYTOKINE_PRODUCTION	30	-0.5756	-1.61471	0.00473934	0.0225562	1	4242	tags=50%, list=22%, signal=64%
GO_NEGATIVE_REGULATION_OF_ALPHA_BETA_T_CELL_DIFFERENTIATION	25	-0.596919	-1.61437	0.00591017	0.0226246	1	3776	tags=52%, list=20%, signal=65%
GO_PERIPHERAL_NERVOUS_SYSTEM_DEVELOPMENT	76	-0.506275	-1.61377	0.00105597	0.0227815	1	4012	tags=42%, list=21%, signal=53%
GO_TERTIARY_GRANULE_LUMEN	55	-0.528876	-1.61348	0.00217155	0.0228502	1	5774	tags=56%, list=30%, signal=81%
GO_POSITIVE_REGULATION_OF_MYELOID_LEUKOCYTE_MEDIATED_IMMUNITY	33	-0.563497	-1.61319	0.00569476	0.0229086	1	4482	tags=55%, list=24%, signal=71%
GO_HEART_TRABECULA_MORPHOGENESIS	33	-0.56477	-1.61294	0.00344828	0.0229429	1	2597	tags=36%, list=14%, signal=42%
GO_REGULATION_OF_T_CELL_DIFFERENTIATION_IN_THYMUS	27	-0.579639	-1.61242	0.0107143	0.0230629	1	5556	tags=63%, list=29%, signal=89%
GO_SEMAPHORIN_PLEXIN_SIGNALING_PATHWAY	40	-0.551098	-1.61199	0.00798176	0.0231569	1	5631	tags=60%, list=30%, signal=85%
GO_MEMBRANE_RAFT_ORGANIZATION	24	-0.587694	-1.61149	0.00595948	0.0232745	1	3874	tags=42%, list=20%, signal=52%
GO_REGULATION_OF_BICELLULAR_TIGHT_JUNCTION_ASSEMBLY	23	-0.599649	-1.61128	0.00480192	0.0232937	1	3859	tags=39%, list=20%, signal=49%
GO_SODIUM_CHANNEL_COMPLEX	26	-0.585622	-1.61084	0.00850547	0.0233974	1	3792	tags=46%, list=20%, signal=58%
GO_TOLL_LIKE_RECEPTOR_4_SIGNALING_PATHWAY	36	-0.553733	-1.61058	0.00574713	0.0234529	1	4928	tags=53%, list=26%, signal=71%
GO_KIDNEY_EPITHELIUM_DEVELOPMENT	142	-0.479826	-1.61034	0	0.0235063	1	4551	tags=43%, list=24%, signal=56%
GO_CELLULAR_RESPONSE_TO_CAMP	52	-0.525976	-1.61022	0.00217628	0.0235278	1	3864	tags=35%, list=20%, signal=43%
GO_CELLULAR_RESPONSE_TO_CADMIUM_ION	37	-0.55305	-1.61005	0	0.0235554	1	2341	tags=27%, list=12%, signal=31%
GO_NEUROTROPHIN_SIGNALING_PATHWAY	39	-0.555993	-1.6098	0.0045819	0.0236119	1	2306	tags=31%, list=12%, signal=35%
GO_RESPONSE_TO_PURINE_CONTAINING_COMPOUND	148	-0.479996	-1.60967	0	0.0236116	1	3987	tags=34%, list=21%, signal=42%
GO_DEFENSE_RESPONSE_TO_GRAM_POSITIVE_BACTERIUM	95	-0.496822	-1.60883	0	0.023801	1	5015	tags=44%, list=26%, signal=60%
GO_RESPIRATORY_SYSTEM_DEVELOPMENT	200	-0.470045	-1.6072	0	0.0242103	1	3873	tags=38%, list=20%, signal=47%
GO_CARDIOCYTE_DIFFERENTIATION	133	-0.480196	-1.60708	0	0.0242217	1	4784	tags=41%, list=25%, signal=54%
GO_POSITIVE_REGULATION_OF_NOTCH_SIGNALING_PATHWAY	53	-0.527947	-1.60613	0	0.0244239	1	4458	tags=40%, list=23%, signal=52%
GO_POSITIVE_REGULATION_OF_TRANSMEMBRANE_TRANSPORT	205	-0.471724	-1.60518	0	0.0246597	1	4158	tags=37%, list=22%, signal=46%
GO_RESPONSE_TO_COPPER_ION	40	-0.546134	-1.60512	0.00462428	0.0246378	1	2267	tags=30%, list=12%, signal=34%
GO_POSITIVE_REGULATION_OF_COLLAGEN_METABOLIC_PROCESS	26	-0.584286	-1.60501	0.0132212	0.0246501	1	5366	tags=69%, list=28%, signal=96%
GO_ANTIMICROBIAL_HUMORAL_IMMUNE_RESPONSE_MEDIATED_BY_ANTIMICROBIAL_PEPTIDE	74	-0.506347	-1.60498	0.0021254	0.0246353	1	4276	tags=41%, list=22%, signal=52%
GO_COLLAGEN_BINDING	70	-0.507496	-1.60498	0.0021097	0.0246158	1	4341	tags=36%, list=23%, signal=46%
GO_KERATINOCYTE_DIFFERENTIATION	217	-0.470851	-1.60479	0	0.0246457	1	5406	tags=40%, list=28%, signal=55%
GO_RESPONSE_TO_PROGESTERONE	44	-0.529934	-1.60447	0.00903955	0.024726	1	2914	tags=39%, list=15%, signal=46%
GO_GAP_JUNCTION	32	-0.565787	-1.60428	0.00817757	0.02476	1	3251	tags=34%, list=17%, signal=41%
GO_REGULATORY_T_CELL_DIFFERENTIATION	32	-0.570525	-1.6039	0.0107271	0.024846	1	4039	tags=59%, list=21%, signal=75%
GO_CYSTEINE_TYPE_ENDOPEPTIDASE_REGULATOR_ACTIVITY_INVOLVED_IN_APOPTOTIC_PROCESS	41	-0.534938	-1.60355	0.0045045	0.0249266	1	2859	tags=39%, list=15%, signal=46%
GO_POSITIVE_REGULATION_OF_PEPTIDE_SECRETION	217	-0.46664	-1.60253	0	0.0252251	1	4611	tags=38%, list=24%, signal=50%
GO_NEGATIVE_REGULATION_OF_EPITHELIAL_CELL_APOPTOTIC_PROCESS	42	-0.539982	-1.6023	0.0055991	0.0252586	1	4284	tags=43%, list=22%, signal=55%
GO_POSITIVE_REGULATION_OF_MAP_KINASE_ACTIVITY	262	-0.463898	-1.60209	0	0.0252973	1	5366	tags=47%, list=28%, signal=64%
GO_CELL_SUBSTRATE_JUNCTION	423	-0.459313	-1.60152	0	0.0254051	1	5102	tags=42%, list=27%, signal=56%
GO_REGULATION_OF_SUPEROXIDE_METABOLIC_PROCESS	34	-0.551701	-1.60134	0.00793651	0.0254351	1	4686	tags=56%, list=25%, signal=74%
GO_CARDIAC_CHAMBER_MORPHOGENESIS	127	-0.479248	-1.60078	0	0.0255583	1	3335	tags=35%, list=18%, signal=42%
GO_POSITIVE_REGULATION_OF_ORGAN_GROWTH	48	-0.530099	-1.60046	0.00109769	0.0256292	1	3374	tags=40%, list=18%, signal=48%
GO_SH3_DOMAIN_BINDING	130	-0.484607	-1.60023	0	0.0256831	1	4099	tags=39%, list=22%, signal=50%
GO_PHYSIOLOGICAL_CARDIAC_MUSCLE_HYPERTROPHY	27	-0.573117	-1.59956	0.0118064	0.0258414	1	3509	tags=41%, list=18%, signal=50%
GO_ISOPRENOID_METABOLIC_PROCESS	143	-0.476482	-1.59933	0	0.025893	1	3816	tags=31%, list=20%, signal=38%
GO_MEMORY	121	-0.483806	-1.5992	0	0.0259048	1	3909	tags=34%, list=21%, signal=42%
GO_POSITIVE_REGULATION_OF_ION_TRANSPORT	279	-0.463365	-1.59837	0	0.0261188	1	4572	tags=37%, list=24%, signal=47%
GO_BIOMINERALIZATION	160	-0.472984	-1.59804	0	0.0262149	1	2706	tags=29%, list=14%, signal=33%
GO_REGULATION_OF_MACROPHAGE_DIFFERENTIATION	21	-0.612389	-1.59803	0.0124224	0.0261978	1	1773	tags=33%, list=9%, signal=37%
GO_SPECIFIC_GRANULE_LUMEN	62	-0.512081	-1.59737	0.00109409	0.0263826	1	4771	tags=45%, list=25%, signal=60%
GO_POSITIVE_REGULATION_OF_MAST_CELL_ACTIVATION	22	-0.60608	-1.59731	0.00961539	0.0263829	1	4284	tags=55%, list=22%, signal=70%
GO_NEGATIVE_REGULATION_OF_TRANSMEMBRANE_TRANSPORT	113	-0.484149	-1.59722	0	0.0263911	1	4593	tags=35%, list=24%, signal=46%
GO_REGULATION_OF_LIPID_TRANSPORT	114	-0.476683	-1.59714	0.00102564	0.0263914	1	4085	tags=34%, list=21%, signal=43%
GO_TYPE_B_PANCREATIC_CELL_PROLIFERATION	21	-0.597991	-1.59691	0.00880503	0.0264295	1	5260	tags=62%, list=28%, signal=85%
GO_OSSIFICATION	393	-0.460026	-1.59687	0	0.0264214	1	4063	tags=36%, list=21%, signal=45%
GO_CELL_FATE_COMMITMENT	264	-0.464388	-1.59591	0	0.026601	1	3645	tags=33%, list=19%, signal=40%
GO_HYDROGEN_PEROXIDE_METABOLIC_PROCESS	55	-0.517593	-1.59576	0.00542888	0.0266281	1	4378	tags=42%, list=23%, signal=54%
GO_MESENCHYMAL_CELL_DIFFERENTIATION	217	-0.464931	-1.59572	0	0.0266212	1	5510	tags=47%, list=29%, signal=65%
GO_POSITIVE_REGULATION_OF_BMP_SIGNALING_PATHWAY	34	-0.556732	-1.5957	0.010333	0.026604	1	4557	tags=44%, list=24%, signal=58%
GO_ACTININ_BINDING	36	-0.549521	-1.59565	0.00457666	0.0265971	1	2858	tags=39%, list=15%, signal=46%
GO_NEGATIVE_REGULATION_OF_CALCIUM_MEDIATED_SIGNALING	30	-0.570674	-1.59561	0.00928074	0.0265921	1	3649	tags=47%, list=19%, signal=58%
GO_POSITIVE_REGULATION_OF_CATION_CHANNEL_ACTIVITY	72	-0.501745	-1.59502	0.00105597	0.0267645	1	4157	tags=42%, list=22%, signal=53%
GO_NEGATIVE_REGULATION_OF_ESTABLISHMENT_OF_PROTEIN_LOCALIZATION	146	-0.473244	-1.59425	0	0.0269331	1	4321	tags=39%, list=23%, signal=50%
GO_POSITIVE_REGULATION_OF_TUMOR_NECROSIS_FACTOR_SECRETION	25	-0.581021	-1.59418	0.00717703	0.0269349	1	2800	tags=36%, list=15%, signal=42%
GO_REGULATION_OF_JUN_KINASE_ACTIVITY	87	-0.49442	-1.59319	0	0.0272367	1	5359	tags=51%, list=28%, signal=70%
GO_GROWTH_FACTOR_RECEPTOR_BINDING	141	-0.473024	-1.59312	0	0.0272401	1	3685	tags=35%, list=19%, signal=44%
GO_ZYMOGEN_ACTIVATION	58	-0.519812	-1.59296	0	0.0272678	1	2722	tags=29%, list=14%, signal=34%
GO_CHOLESTEROL_EFFLUX	48	-0.524083	-1.59291	0.00662252	0.0272629	1	4085	tags=38%, list=21%, signal=48%
GO_NEGATIVE_REGULATION_OF_ACTIN_FILAMENT_BUNDLE_ASSEMBLY	29	-0.567823	-1.59257	0.00480769	0.0273547	1	4009	tags=45%, list=21%, signal=57%
GO_POSITIVE_REGULATION_OF_CELLULAR_CARBOHYDRATE_METABOLIC_PROCESS	58	-0.51363	-1.59238	0.00215285	0.0273811	1	3259	tags=33%, list=17%, signal=39%
GO_ACTIVATION_OF_PROTEIN_KINASE_B_ACTIVITY	32	-0.560983	-1.5919	0.0105758	0.0275232	1	3819	tags=44%, list=20%, signal=55%
GO_REGULATION_OF_SUPRAMOLECULAR_FIBER_ORGANIZATION	361	-0.458467	-1.59155	0	0.027581	1	4172	tags=35%, list=22%, signal=45%
GO_SIALIC_ACID_BINDING	22	-0.599761	-1.59114	0.0123762	0.0276733	1	5454	tags=59%, list=29%, signal=83%
GO_CELL_COMMUNICATION_BY_ELECTRICAL_COUPLING	31	-0.555113	-1.5911	0.0130797	0.0276613	1	4471	tags=39%, list=23%, signal=50%
GO_REGULATION_OF_TOLL_LIKE_RECEPTOR_4_SIGNALING_PATHWAY	20	-0.610536	-1.59108	0.0147059	0.0276455	1	3682	tags=50%, list=19%, signal=62%
GO_UROGENITAL_SYSTEM_DEVELOPMENT	327	-0.458097	-1.59104	0	0.0276316	1	4551	tags=40%, list=24%, signal=52%
GO_T_CELL_CYTOKINE_PRODUCTION	41	-0.537043	-1.5907	0.00342466	0.0276882	1	4481	tags=46%, list=24%, signal=60%
GO_REGULATION_OF_MAP_KINASE_ACTIVITY	338	-0.460414	-1.59059	0	0.0276957	1	3992	tags=36%, list=21%, signal=45%
GO_RESPONSE_TO_REACTIVE_OXYGEN_SPECIES	220	-0.46586	-1.59057	0	0.0276812	1	4968	tags=44%, list=26%, signal=58%
GO_PHOSPHORIC_DIESTER_HYDROLASE_ACTIVITY	89	-0.48862	-1.58971	0.00103413	0.0279334	1	2775	tags=30%, list=15%, signal=35%
GO_RESPONSE_TO_TRANSFORMING_GROWTH_FACTOR_BETA	241	-0.462538	-1.58971	0	0.0279137	1	3478	tags=33%, list=18%, signal=40%
GO_MAINTENANCE_OF_LOCATION_IN_CELL	210	-0.464316	-1.58927	0	0.028021	1	3819	tags=32%, list=20%, signal=39%
GO_MYELOID_LEUKOCYTE_CYTOKINE_PRODUCTION	29	-0.577858	-1.58911	0.0105758	0.0280626	1	5146	tags=62%, list=27%, signal=85%
GO_FATTY_ACID_DERIVATIVE_TRANSPORT	50	-0.51926	-1.58794	0.00873363	0.0283893	1	3988	tags=34%, list=21%, signal=43%
GO_REGULATION_OF_NECROTIC_CELL_DEATH	26	-0.577278	-1.5879	0.0109489	0.0283788	1	3695	tags=42%, list=19%, signal=52%
GO_VOLTAGE_GATED_SODIUM_CHANNEL_ACTIVITY	23	-0.601435	-1.58742	0.0134639	0.0285223	1	3792	tags=52%, list=20%, signal=65%
GO_NEGATIVE_REGULATION_OF_CYSTEINE_TYPE_ENDOPEPTIDASE_ACTIVITY	89	-0.494664	-1.58738	0	0.0285166	1	4495	tags=39%, list=24%, signal=51%
GO_ARTERY_DEVELOPMENT	89	-0.485582	-1.58691	0.00521376	0.0286535	1	3970	tags=43%, list=21%, signal=54%
GO_INTERLEUKIN_13_PRODUCTION	20	-0.619644	-1.5866	0.00631313	0.0286947	1	5028	tags=70%, list=26%, signal=95%
GO_CELL_CELL_CONTACT_ZONE	74	-0.499011	-1.58621	0.00211864	0.028793	1	3792	tags=31%, list=20%, signal=39%
GO_PEPTIDYL_SERINE_DEPHOSPHORYLATION	20	-0.615267	-1.58612	0.00880503	0.0288027	1	847	tags=25%, list=4%, signal=26%
GO_A_BAND	37	-0.548519	-1.58607	0.0123457	0.0288024	1	3242	tags=35%, list=17%, signal=42%
GO_RESPONSE_TO_ZINC_ION	53	-0.513832	-1.58547	0.00332226	0.028959	1	3556	tags=32%, list=19%, signal=39%
GO_NEGATIVE_REGULATION_OF_TRANSPORT	441	-0.457783	-1.58512	0	0.0290405	1	4834	tags=37%, list=25%, signal=48%
GO_ICOSANOID_METABOLIC_PROCESS	117	-0.478581	-1.58503	0	0.0290543	1	5005	tags=43%, list=26%, signal=58%
GO_FC_RECEPTOR_MEDIATED_STIMULATORY_SIGNALING_PATHWAY	92	-0.485077	-1.58431	0.00414938	0.0292703	1	3921	tags=37%, list=21%, signal=46%
GO_NEGATIVE_REGULATION_OF_HEMOPOIESIS	150	-0.468983	-1.584	0.00101729	0.0293504	1	4978	tags=45%, list=26%, signal=61%
GO_APOPTOTIC_PROCESS_INVOLVED_IN_DEVELOPMENT	37	-0.552355	-1.58398	0.0124717	0.0293368	1	5028	tags=54%, list=26%, signal=73%
GO_SENSORY_PERCEPTION_OF_PAIN	105	-0.479441	-1.58366	0.00203874	0.0293982	1	5174	tags=43%, list=27%, signal=59%
GO_TOLL_LIKE_RECEPTOR_SIGNALING_PATHWAY	146	-0.470127	-1.5833	0	0.0294717	1	4935	tags=44%, list=26%, signal=59%
GO_NEGATIVE_REGULATION_OF_MAPK_CASCADE	166	-0.465482	-1.58266	0	0.0296866	1	3819	tags=34%, list=20%, signal=42%
GO_REGULATION_OF_EXTRINSIC_APOPTOTIC_SIGNALING_PATHWAY_VIA_DEATH_DOMAIN_RECEPTORS	59	-0.515664	-1.5825	0.00107181	0.02972	1	3749	tags=39%, list=20%, signal=48%
GO_ACTOMYOSIN_STRUCTURE_ORGANIZATION	191	-0.466281	-1.58244	0	0.0296998	1	4002	tags=37%, list=21%, signal=46%
GO_TERTIARY_GRANULE	163	-0.466627	-1.58214	0	0.0297717	1	4878	tags=40%, list=26%, signal=54%
GO_REGULATION_OF_EXTRINSIC_APOPTOTIC_SIGNALING_PATHWAY	158	-0.47013	-1.58192	0	0.0298189	1	3859	tags=35%, list=20%, signal=43%
GO_SIGNALING_ADAPTOR_ACTIVITY	68	-0.499417	-1.58153	0.00319489	0.0298629	1	2697	tags=34%, list=14%, signal=39%
GO_DETECTION_OF_STIMULUS_INVOLVED_IN_SENSORY_PERCEPTION_OF_PAIN	25	-0.574395	-1.58141	0.0144058	0.0298743	1	5004	tags=52%, list=26%, signal=70%
GO_CONNECTIVE_TISSUE_DEVELOPMENT	256	-0.457675	-1.58105	0	0.0299869	1	3971	tags=36%, list=21%, signal=45%
GO_MUCOPOLYSACCHARIDE_METABOLIC_PROCESS	113	-0.482803	-1.58097	0.00103199	0.0299979	1	3971	tags=39%, list=21%, signal=49%
GO_PEPTIDASE_ACTIVATOR_ACTIVITY	39	-0.540527	-1.58089	0.0127315	0.0300102	1	4616	tags=54%, list=24%, signal=71%
GO_POSITIVE_REGULATION_OF_CARBOHYDRATE_METABOLIC_PROCESS	80	-0.485708	-1.5799	0.00419727	0.0302685	1	4887	tags=39%, list=26%, signal=52%
GO_REGULATION_OF_CARDIAC_MUSCLE_CONTRACTION	76	-0.490323	-1.57968	0.00104275	0.0302925	1	6192	tags=49%, list=33%, signal=72%
GO_EPITHELIAL_TO_MESENCHYMAL_TRANSITION	142	-0.478461	-1.5795	0	0.0303353	1	5467	tags=48%, list=29%, signal=67%
GO_REGULATION_OF_PEPTIDE_SECRETION	398	-0.451208	-1.57879	0	0.0305669	1	5316	tags=43%, list=28%, signal=58%
GO_POSITIVE_REGULATION_OF_MACROPHAGE_MIGRATION	26	-0.582142	-1.57755	0.0143885	0.0309425	1	4826	tags=54%, list=25%, signal=72%
GO_B_CELL_ACTIVATION_INVOLVED_IN_IMMUNE_RESPONSE	78	-0.490284	-1.57738	0.00316456	0.0309828	1	4284	tags=49%, list=22%, signal=63%
GO_CELL_CELL_JUNCTION_ORGANIZATION	208	-0.461563	-1.577	0	0.0310917	1	3859	tags=32%, list=20%, signal=40%
GO_ION_CHANNEL_REGULATOR_ACTIVITY	116	-0.477787	-1.57687	0.00102249	0.0310969	1	4240	tags=34%, list=22%, signal=44%
GO_CELLULAR_RESPONSE_TO_KETONE	96	-0.4794	-1.57561	0	0.0314702	1	3997	tags=40%, list=21%, signal=50%
GO_CYTOSOLIC_LARGE_RIBOSOMAL_SUBUNIT	56	-0.508324	-1.57461	0.00435256	0.0318051	1	7067	tags=70%, list=37%, signal=110%
GO_REGULATION_OF_OLIGODENDROCYTE_DIFFERENTIATION	39	-0.536508	-1.57439	0.0112613	0.0318685	1	4734	tags=41%, list=25%, signal=54%
GO_POSITIVE_REGULATION_OF_NF_KAPPAB_TRANSCRIPTION_FACTOR_ACTIVITY	158	-0.468671	-1.57432	0	0.0318667	1	5212	tags=49%, list=27%, signal=67%
GO_EXTRINSIC_APOPTOTIC_SIGNALING_PATHWAY	226	-0.457031	-1.57378	0	0.032047	1	3859	tags=35%, list=20%, signal=43%
GO_REGULATION_OF_METANEPHROS_DEVELOPMENT	23	-0.584194	-1.57297	0.0244798	0.0323516	1	1930	tags=35%, list=10%, signal=39%
GO_POSITIVE_REGULATION_OF_CYTOKINE_PRODUCTION_INVOLVED_IN_INFLAMMATORY_RESPONSE	21	-0.591551	-1.57275	0.0199005	0.0324091	1	5227	tags=67%, list=27%, signal=92%
GO_REGULATION_OF_LAMELLIPODIUM_ASSEMBLY	35	-0.534679	-1.57119	0.0103687	0.0328388	1	2860	tags=31%, list=15%, signal=37%
GO_BRANCHING_MORPHOGENESIS_OF_AN_EPITHELIAL_TUBE	149	-0.461166	-1.57112	0	0.032831	1	3957	tags=37%, list=21%, signal=46%
GO_RETINOL_DEHYDROGENASE_ACTIVITY	20	-0.598173	-1.57055	0.0160099	0.0330103	1	2702	tags=40%, list=14%, signal=47%
GO_SUPEROXIDE_ANION_GENERATION	36	-0.539244	-1.57042	0.0126874	0.0330296	1	4686	tags=50%, list=25%, signal=66%
GO_REGULATION_OF_VIRAL_ENTRY_INTO_HOST_CELL	37	-0.531099	-1.57023	0.0137773	0.0330843	1	5091	tags=54%, list=27%, signal=74%
GO_RESPONSE_TO_ESTRADIOL	140	-0.46837	-1.5701	0	0.033089	1	3851	tags=33%, list=20%, signal=41%
GO_POSITIVE_REGULATION_OF_EXTRINSIC_APOPTOTIC_SIGNALING_PATHWAY	51	-0.515976	-1.56985	0.00541712	0.033159	1	3476	tags=33%, list=18%, signal=41%
GO_REGULATION_OF_EXCRETION	24	-0.588114	-1.56984	0.0145808	0.0331374	1	2201	tags=29%, list=12%, signal=33%
GO_RIBONUCLEOSIDE_CATABOLIC_PROCESS	22	-0.586054	-1.56954	0.0243902	0.0332255	1	3226	tags=45%, list=17%, signal=55%
GO_SPECIFIC_GRANULE	159	-0.464091	-1.56822	0	0.0335919	1	4898	tags=42%, list=26%, signal=56%
GO_ESTABLISHMENT_OF_ENDOTHELIAL_BARRIER	46	-0.523923	-1.56818	0.0121413	0.0335818	1	1479	tags=26%, list=8%, signal=28%
GO_NEGATIVE_REGULATION_OF_EXTRINSIC_APOPTOTIC_SIGNALING_PATHWAY_VIA_DEATH_DOMAIN_RECEPTORS	39	-0.523932	-1.56811	0.0150987	0.033587	1	3749	tags=41%, list=20%, signal=51%
GO_NEGATIVE_REGULATION_OF_VIRAL_LIFE_CYCLE	82	-0.484016	-1.56757	0	0.0337484	1	4189	tags=37%, list=22%, signal=47%
GO_POSITIVE_REGULATION_OF_G_PROTEIN_COUPLED_RECEPTOR_SIGNALING_PATHWAY	28	-0.565977	-1.56744	0.00483676	0.0337822	1	3373	tags=36%, list=18%, signal=43%
GO_PHOSPHATIDYLINOSITOL_3_4_BISPHOSPHATE_BINDING	28	-0.569357	-1.56714	0.0187354	0.0338658	1	3368	tags=39%, list=18%, signal=48%
GO_POSITIVE_REGULATION_OF_CARTILAGE_DEVELOPMENT	32	-0.552027	-1.56685	0.0170843	0.0339248	1	2913	tags=38%, list=15%, signal=44%
GO_COPPER_ION_BINDING	56	-0.506078	-1.56656	0.00219058	0.0340143	1	5504	tags=50%, list=29%, signal=70%
GO_CELLULAR_RESPONSE_TO_VIRUS	57	-0.502048	-1.56614	0.00325027	0.0341485	1	3575	tags=37%, list=19%, signal=45%
GO_CHONDROITIN_SULFATE_PROTEOGLYCAN_METABOLIC_PROCESS	44	-0.518233	-1.56598	0.00896861	0.0341871	1	3971	tags=43%, list=21%, signal=54%
GO_RUFFLE_ASSEMBLY	44	-0.515959	-1.56558	0.0110497	0.0342879	1	5319	tags=50%, list=28%, signal=69%
GO_CELLULAR_RESPONSE_TO_PROSTAGLANDIN_STIMULUS	22	-0.587383	-1.56525	0.0195599	0.0343861	1	3969	tags=55%, list=21%, signal=69%
GO_MAINTENANCE_OF_LOCATION	316	-0.453371	-1.56521	0	0.0343762	1	4158	tags=34%, list=22%, signal=43%
GO_POSITIVE_REGULATION_OF_FATTY_ACID_METABOLIC_PROCESS	36	-0.540807	-1.56441	0.0122905	0.0346463	1	4887	tags=53%, list=26%, signal=71%
GO_POSITIVE_REGULATION_OF_ANIMAL_ORGAN_MORPHOGENESIS	84	-0.491367	-1.56426	0.00104493	0.0346739	1	1441	tags=25%, list=8%, signal=27%
GO_HEART_MORPHOGENESIS	248	-0.456389	-1.56422	0	0.0346609	1	3774	tags=34%, list=20%, signal=42%
GO_STEROL_HOMEOSTASIS	83	-0.49056	-1.5636	0.00106157	0.0348605	1	4201	tags=36%, list=22%, signal=46%
GO_REGULATION_OF_LONG_TERM_SYNAPTIC_POTENTIATION	47	-0.514311	-1.56297	0.00891862	0.0350561	1	2743	tags=32%, list=14%, signal=37%
GO_AMINOGLYCAN_CATABOLIC_PROCESS	67	-0.490741	-1.56287	0.00636267	0.0350827	1	3971	tags=36%, list=21%, signal=45%
GO_REGULATION_OF_GLYCOPROTEIN_METABOLIC_PROCESS	47	-0.521769	-1.56262	0.00776915	0.0351589	1	1318	tags=26%, list=7%, signal=27%
GO_PROTEIN_LIPID_COMPLEX_BINDING	29	-0.555516	-1.56261	0.0176471	0.0351364	1	2962	tags=34%, list=16%, signal=41%
GO_RESPONSE_TO_VITAMIN	88	-0.482944	-1.56238	0.00104822	0.0351963	1	3525	tags=36%, list=19%, signal=44%
GO_POSITIVE_REGULATION_OF_CELL_JUNCTION_ASSEMBLY	101	-0.475225	-1.56204	0.00514403	0.0353137	1	6014	tags=48%, list=32%, signal=69%
GO_NEGATIVE_REGULATION_OF_TRANSPORTER_ACTIVITY	76	-0.485445	-1.56176	0.00424178	0.035389	1	3914	tags=30%, list=21%, signal=38%
GO_EXTRINSIC_APOPTOTIC_SIGNALING_PATHWAY_VIA_DEATH_DOMAIN_RECEPTORS	87	-0.481697	-1.56145	0.00206825	0.0354756	1	3859	tags=39%, list=20%, signal=49%
GO_EMBRYONIC_HEART_TUBE_MORPHOGENESIS	68	-0.488747	-1.56113	0.00539957	0.035581	1	4852	tags=40%, list=25%, signal=53%
GO_AMINOGLYCAN_METABOLIC_PROCESS	172	-0.461079	-1.56108	0	0.0355762	1	5026	tags=43%, list=26%, signal=58%
GO_MUSCLE_TISSUE_DEVELOPMENT	380	-0.447839	-1.56091	0	0.0356246	1	3970	tags=32%, list=21%, signal=40%
GO_PHOSPHATIDYLINOSITOL_3_KINASE_BINDING	30	-0.554896	-1.56061	0.0103567	0.0357229	1	3940	tags=40%, list=21%, signal=50%
GO_GRANULOCYTE_DIFFERENTIATION	34	-0.542469	-1.56058	0.016055	0.0357127	1	5932	tags=65%, list=31%, signal=94%
GO_POSITIVE_REGULATION_OF_CYTOSKELETON_ORGANIZATION	226	-0.451613	-1.56051	0	0.0357118	1	4166	tags=34%, list=22%, signal=43%
GO_ACTIN_POLYMERIZATION_OR_DEPOLYMERIZATION	218	-0.458081	-1.56027	0	0.035784	1	2473	tags=28%, list=13%, signal=32%
GO_REGULATION_OF_TRANSPORTER_ACTIVITY	278	-0.450194	-1.55999	0	0.0358825	1	4614	tags=35%, list=24%, signal=46%
GO_CELL_ADHESION_MEDIATOR_ACTIVITY	60	-0.495741	-1.5598	0.00981461	0.0359386	1	1834	tags=22%, list=10%, signal=24%
GO_STEM_CELL_DIVISION	43	-0.519757	-1.55848	0.0145089	0.0363371	1	3761	tags=42%, list=20%, signal=52%
GO_ACTIN_CYTOSKELETON	500	-0.445862	-1.55839	0	0.0363483	1	5208	tags=42%, list=27%, signal=56%
GO_PROTEIN_LIPID_COMPLEX_SUBUNIT_ORGANIZATION	54	-0.507223	-1.55828	0.00756757	0.0363657	1	4085	tags=31%, list=21%, signal=40%
GO_CARTILAGE_DEVELOPMENT	194	-0.454723	-1.55776	0	0.0365315	1	4113	tags=36%, list=22%, signal=46%
GO_STRUCTURAL_CONSTITUENT_OF_EYE_LENS	24	-0.571631	-1.55765	0.017199	0.0365578	1	3694	tags=38%, list=19%, signal=46%
GO_BONE_MATURATION	22	-0.585874	-1.55703	0.0220318	0.0367254	1	4568	tags=55%, list=24%, signal=72%
GO_RESPONSE_TO_VIRUS	338	-0.45047	-1.55676	0	0.036816	1	4039	tags=33%, list=21%, signal=42%
GO_MORPHOGENESIS_OF_AN_EPITHELIAL_SHEET	57	-0.504109	-1.5559	0.00649351	0.037151	1	3835	tags=37%, list=20%, signal=46%
GO_NEGATIVE_REGULATION_OF_ENDOCYTOSIS	43	-0.527082	-1.55568	0.00331858	0.0372163	1	4981	tags=44%, list=26%, signal=60%
GO_CELL_CELL_SIGNALING_INVOLVED_IN_CARDIAC_CONDUCTION	30	-0.550752	-1.55556	0.0218391	0.037234	1	4056	tags=53%, list=21%, signal=68%
GO_KILLING_OF_CELLS_OF_OTHER_ORGANISM	64	-0.497608	-1.55521	0.0032538	0.037351	1	5869	tags=45%, list=31%, signal=65%
GO_EMBRYONIC_HEART_TUBE_DEVELOPMENT	77	-0.483367	-1.55488	0.00212766	0.037438	1	3374	tags=31%, list=18%, signal=38%
GO_NEGATIVE_REGULATION_OF_POTASSIUM_ION_TRANSMEMBRANE_TRANSPORT	24	-0.576221	-1.55477	0.0169082	0.0374562	1	1524	tags=21%, list=8%, signal=23%
GO_REGULATION_OF_NON_CANONICAL_WNT_SIGNALING_PATHWAY	23	-0.569567	-1.5546	0.0147059	0.0374986	1	4300	tags=48%, list=23%, signal=62%
GO_FIBRINOLYSIS	26	-0.569497	-1.55449	0.00968523	0.0375257	1	5369	tags=46%, list=28%, signal=64%
GO_ADHERENS_JUNCTION	166	-0.458654	-1.55356	0.00101112	0.037857	1	3842	tags=31%, list=20%, signal=39%
GO_NUCLEOBASE_CONTAINING_SMALL_MOLECULE_CATABOLIC_PROCESS	49	-0.515085	-1.55321	0.00443459	0.037947	1	3975	tags=39%, list=21%, signal=49%
GO_PODOSOME	29	-0.551899	-1.55307	0.0107656	0.0379725	1	5319	tags=62%, list=28%, signal=86%
GO_REGULATION_OF_HEMOPOIESIS	479	-0.443667	-1.55291	0	0.0380154	1	4284	tags=36%, list=22%, signal=45%
GO_MUSCLE_CELL_DIFFERENTIATION	347	-0.449069	-1.55277	0	0.0380549	1	4703	tags=39%, list=25%, signal=51%
GO_CYSTEINE_TYPE_ENDOPEPTIDASE_INHIBITOR_ACTIVITY_INVOLVED_IN_APOPTOTIC_PROCESS	24	-0.577856	-1.55255	0.0181598	0.0381228	1	2859	tags=42%, list=15%, signal=49%
GO_ENDOPLASMIC_RETICULUM_LUMEN	307	-0.446179	-1.55223	0	0.0382314	1	4763	tags=38%, list=25%, signal=50%
GO_MESENCHYME_DEVELOPMENT	276	-0.449316	-1.55208	0	0.0382729	1	5510	tags=45%, list=29%, signal=62%
GO_VASCULAR_ASSOCIATED_SMOOTH_MUSCLE_CONTRACTION	24	-0.581302	-1.55172	0.0120482	0.038407	1	2914	tags=42%, list=15%, signal=49%
GO_NEGATIVE_REGULATION_OF_MUSCLE_CELL_APOPTOTIC_PROCESS	35	-0.542141	-1.55151	0.0138889	0.0384679	1	5160	tags=51%, list=27%, signal=70%
GO_POSITIVE_REGULATION_OF_MYOBLAST_DIFFERENTIATION	22	-0.585535	-1.55143	0.0156627	0.0384746	1	3774	tags=45%, list=20%, signal=57%
GO_CALCIUM_DEPENDENT_CELL_CELL_ADHESION_VIA_PLASMA_MEMBRANE_CELL_ADHESION_MOLECULES	43	-0.526275	-1.55128	0.0111359	0.0384802	1	5397	tags=56%, list=28%, signal=78%
GO_REGULATION_OF_POTASSIUM_ION_TRANSPORT	97	-0.474053	-1.55084	0.00102987	0.0386224	1	4502	tags=37%, list=24%, signal=48%
GO_REGULATION_OF_DEFENSE_RESPONSE_TO_VIRUS_BY_HOST	40	-0.535229	-1.55047	0.0114286	0.0387411	1	4284	tags=48%, list=22%, signal=61%
GO_SMOOTH_MUSCLE_CELL_DIFFERENTIATION	56	-0.498085	-1.55047	0.0054407	0.0387154	1	5529	tags=57%, list=29%, signal=80%
GO_MATERNAL_PLACENTA_DEVELOPMENT	36	-0.531232	-1.55041	0.0169683	0.0386902	1	2902	tags=31%, list=15%, signal=36%
GO_AORTA_DEVELOPMENT	54	-0.505154	-1.55026	0.00656455	0.0387344	1	4491	tags=44%, list=24%, signal=58%
GO_EPIDERMAL_CELL_DIFFERENTIATION	276	-0.449157	-1.54979	0	0.0388434	1	5406	tags=38%, list=28%, signal=53%
GO_FIBROBLAST_GROWTH_FACTOR_BINDING	23	-0.571855	-1.54951	0.0218978	0.0389471	1	3886	tags=43%, list=20%, signal=55%
GO_NEGATIVE_REGULATION_OF_MYELOID_LEUKOCYTE_DIFFERENTIATION	49	-0.504196	-1.54942	0.0130435	0.0389578	1	5531	tags=59%, list=29%, signal=83%
GO_FOCAL_ADHESION_ASSEMBLY	83	-0.481632	-1.54847	0.00209205	0.0392995	1	4449	tags=36%, list=23%, signal=47%
GO_NEGATIVE_REGULATION_OF_ORGAN_GROWTH	33	-0.534894	-1.5483	0.017301	0.0393266	1	2941	tags=27%, list=15%, signal=32%
GO_MODULATION_BY_SYMBIONT_OF_ENTRY_INTO_HOST	44	-0.518502	-1.54717	0.00995575	0.0398046	1	5091	tags=50%, list=27%, signal=68%
GO_LIPID_EXPORT_FROM_CELL	39	-0.524013	-1.54711	0.0112994	0.0398038	1	5216	tags=49%, list=27%, signal=67%
GO_NEGATIVE_REGULATION_OF_NERVOUS_SYSTEM_PROCESS	27	-0.557024	-1.54696	0.0157576	0.0398403	1	3296	tags=37%, list=17%, signal=45%
GO_AMYLOID_PRECURSOR_PROTEIN_METABOLIC_PROCESS	65	-0.489896	-1.54666	0.0053135	0.0399623	1	4024	tags=37%, list=21%, signal=47%
GO_ACTIVATION_OF_ADENYLATE_CYCLASE_ACTIVITY	38	-0.527622	-1.54632	0.0125571	0.0400263	1	6659	tags=55%, list=35%, signal=85%
GO_VESICLE_LUMEN	327	-0.444546	-1.54619	0	0.0400691	1	4407	tags=35%, list=23%, signal=44%
GO_REGULATION_OF_TUMOR_NECROSIS_FACTOR_MEDIATED_SIGNALING_PATHWAY	57	-0.498014	-1.54569	0.00645856	0.0402574	1	4009	tags=40%, list=21%, signal=51%
GO_REGULATION_OF_FIBROBLAST_MIGRATION	33	-0.546347	-1.54444	0.0103211	0.0407064	1	1918	tags=30%, list=10%, signal=34%
GO_CORTICAL_CYTOSKELETON	106	-0.464928	-1.54423	0.00204708	0.0407445	1	2475	tags=27%, list=13%, signal=31%
GO_POSITIVE_REGULATION_OF_JUN_KINASE_ACTIVITY	72	-0.483817	-1.54404	0.0042508	0.0408112	1	3988	tags=40%, list=21%, signal=51%
GO_NEGATIVE_REGULATION_OF_CELLULAR_RESPONSE_TO_GROWTH_FACTOR_STIMULUS	155	-0.462822	-1.54303	0.00201816	0.041249	1	4011	tags=35%, list=21%, signal=44%
GO_POSITIVE_REGULATION_OF_FIBROBLAST_PROLIFERATION	50	-0.505177	-1.54285	0.0131435	0.0412819	1	3528	tags=44%, list=19%, signal=54%
GO_GLOMERULAR_EPITHELIAL_CELL_DIFFERENTIATION	20	-0.587877	-1.54218	0.0221402	0.041549	1	4012	tags=40%, list=21%, signal=51%
GO_LUNG_ALVEOLUS_DEVELOPMENT	40	-0.522512	-1.54201	0.0146893	0.0416024	1	2952	tags=40%, list=15%, signal=47%
GO_TERTIARY_ALCOHOL_METABOLIC_PROCESS	20	-0.595278	-1.54191	0.0225282	0.0416194	1	3715	tags=50%, list=20%, signal=62%
GO_NEGATIVE_REGULATION_OF_PROTEIN_SERINE_THREONINE_KINASE_ACTIVITY	135	-0.456822	-1.54182	0	0.0416331	1	3682	tags=33%, list=19%, signal=41%
GO_STRIATED_MUSCLE_CELL_DIFFERENTIATION	268	-0.445575	-1.54175	0	0.0416398	1	4593	tags=38%, list=24%, signal=49%
GO_NEGATIVE_REGULATION_OF_GROWTH	244	-0.448352	-1.54111	0	0.0418436	1	4677	tags=36%, list=25%, signal=47%
GO_NEUROPEPTIDE_HORMONE_ACTIVITY	28	-0.556581	-1.54108	0.0117509	0.0418366	1	5694	tags=57%, list=30%, signal=81%
GO_POSITIVE_REGULATION_OF_RELEASE_OF_SEQUESTERED_CALCIUM_ION_INTO_CYTOSOL	40	-0.519598	-1.54089	0.020316	0.0418911	1	4158	tags=43%, list=22%, signal=54%
GO_NITRIC_OXIDE_MEDIATED_SIGNAL_TRANSDUCTION	29	-0.546502	-1.5408	0.0108565	0.0419029	1	2486	tags=31%, list=13%, signal=36%
GO_CHANNEL_REGULATOR_ACTIVITY	145	-0.462811	-1.54038	0	0.0420371	1	5683	tags=41%, list=30%, signal=59%
GO_RESPONSE_TO_DEXAMETHASONE	41	-0.515968	-1.54024	0.0123318	0.0420623	1	3056	tags=39%, list=16%, signal=46%
GO_POSITIVE_REGULATION_OF_DNA_BINDING_TRANSCRIPTION_FACTOR_ACTIVITY	263	-0.443455	-1.53978	0	0.0422031	1	5212	tags=44%, list=27%, signal=60%
GO_REGULATION_OF_CARDIAC_MUSCLE_CONTRACTION_BY_CALCIUM_ION_SIGNALING	25	-0.569003	-1.53971	0.0154394	0.0422098	1	4571	tags=44%, list=24%, signal=58%
GO_EXTRINSIC_COMPONENT_OF_PLASMA_MEMBRANE	171	-0.454884	-1.5387	0	0.0425387	1	3202	tags=31%, list=17%, signal=37%
GO_REGULATION_OF_IMMUNOGLOBULIN_PRODUCTION	65	-0.489266	-1.53861	0.00748663	0.0425516	1	3910	tags=46%, list=21%, signal=58%
GO_POSITIVE_REGULATION_OF_TRANSPORTER_ACTIVITY	112	-0.468641	-1.53855	0.00102881	0.0425469	1	4516	tags=39%, list=24%, signal=51%
GO_NEGATIVE_REGULATION_OF_VIRAL_PROCESS	100	-0.467093	-1.53816	0	0.0426632	1	4189	tags=34%, list=22%, signal=43%
GO_MICROVILLUS	93	-0.47259	-1.53777	0.00312826	0.0427749	1	4425	tags=38%, list=23%, signal=49%
GO_LAMININ_BINDING	29	-0.545839	-1.53753	0.0308924	0.0428491	1	3294	tags=41%, list=17%, signal=50%
GO_CELLULAR_RESPONSE_TO_CALCIUM_ION	82	-0.468279	-1.5375	0.00311203	0.0428394	1	3990	tags=35%, list=21%, signal=45%
GO_NOREPINEPHRINE_TRANSPORT	25	-0.567157	-1.53629	0.020214	0.0433461	1	4321	tags=48%, list=23%, signal=62%
GO_PROSTATE_GLAND_MORPHOGENESIS	27	-0.556201	-1.53501	0.0232274	0.0438716	1	2647	tags=37%, list=14%, signal=43%
GO_ALPHA_ACTININ_BINDING	27	-0.557854	-1.53489	0.0169082	0.0438986	1	2858	tags=37%, list=15%, signal=44%
GO_UNSATURATED_FATTY_ACID_BIOSYNTHETIC_PROCESS	56	-0.498832	-1.53462	0.00873363	0.043973	1	4562	tags=48%, list=24%, signal=63%
GO_ENTRY_INTO_HOST	146	-0.460361	-1.53419	0	0.0441263	1	4578	tags=40%, list=24%, signal=52%
GO_RESPONSE_TO_AXON_INJURY	74	-0.486258	-1.53355	0.00106045	0.0444126	1	4240	tags=41%, list=22%, signal=52%
GO_MHC_PROTEIN_BINDING	37	-0.525574	-1.53323	0.0194731	0.0445409	1	5000	tags=59%, list=26%, signal=80%
GO_POSITIVE_REGULATION_OF_MYELOID_CELL_DIFFERENTIATION	97	-0.471273	-1.53316	0	0.0445429	1	5028	tags=42%, list=26%, signal=57%
GO_NEURAL_CREST_CELL_MIGRATION	55	-0.495135	-1.53303	0.00538793	0.0445671	1	5758	tags=56%, list=30%, signal=81%
GO_HORMONE_ACTIVITY	117	-0.463341	-1.53284	0.00306748	0.0446054	1	5316	tags=39%, list=28%, signal=54%
GO_TUMOR_NECROSIS_FACTOR_RECEPTOR_SUPERFAMILY_BINDING	48	-0.510297	-1.53261	0.00654307	0.0446887	1	4838	tags=52%, list=25%, signal=70%
GO_INTERMEDIATE_FILAMENT_CYTOSKELETON	148	-0.457943	-1.53259	0.0010101	0.0446658	1	4449	tags=30%, list=23%, signal=39%
GO_ENERGY_HOMEOSTASIS	35	-0.53682	-1.53213	0.00924856	0.0448598	1	3969	tags=43%, list=21%, signal=54%
GO_REPLACEMENT_OSSIFICATION	29	-0.545717	-1.53136	0.0165485	0.0451648	1	2398	tags=34%, list=13%, signal=39%
GO_SKELETAL_MUSCLE_CELL_DIFFERENTIATION	67	-0.484714	-1.53132	0.00318134	0.0451544	1	2496	tags=27%, list=13%, signal=31%
GO_REGULATION_OF_ODONTOGENESIS	27	-0.559998	-1.53111	0.0190931	0.0452007	1	1423	tags=30%, list=7%, signal=32%
GO_PHOSPHORUS_OXYGEN_LYASE_ACTIVITY	22	-0.576381	-1.53104	0.0290206	0.0452012	1	3867	tags=41%, list=20%, signal=51%
GO_CHONDROITIN_SULFATE_BIOSYNTHETIC_PROCESS	26	-0.55661	-1.53077	0.0203106	0.0452847	1	5026	tags=58%, list=26%, signal=78%
GO_POSITIVE_REGULATION_OF_NATURAL_KILLER_CELL_MEDIATED_CYTOTOXICITY	21	-0.57287	-1.53054	0.0312876	0.0453587	1	4765	tags=57%, list=25%, signal=76%
GO_POSITIVE_REGULATION_OF_PEPTIDYL_SERINE_PHOSPHORYLATION	109	-0.4568	-1.52998	0.00102564	0.0455762	1	4519	tags=34%, list=24%, signal=44%
GO_HYALURONAN_METABOLIC_PROCESS	37	-0.520414	-1.52965	0.0170261	0.0457069	1	2236	tags=35%, list=12%, signal=40%
GO_FILAMENTOUS_ACTIN	33	-0.530992	-1.52956	0.0207373	0.0457187	1	3882	tags=39%, list=20%, signal=49%
GO_ANCHORED_COMPONENT_OF_MEMBRANE	169	-0.451982	-1.52937	0.00100604	0.0457484	1	5109	tags=41%, list=27%, signal=55%
GO_TOLL_LIKE_RECEPTOR_3_SIGNALING_PATHWAY	20	-0.595372	-1.52909	0.0198265	0.0458672	1	3682	tags=50%, list=19%, signal=62%
GO_POSITIVE_REGULATION_OF_HEART_RATE	26	-0.560117	-1.52895	0.0178571	0.0459065	1	4882	tags=54%, list=26%, signal=72%
GO_REGULATION_OF_ICOSANOID_SECRETION	20	-0.589578	-1.52879	0.0376884	0.0459536	1	5946	tags=55%, list=31%, signal=80%
GO_RESPONSE_TO_OSMOTIC_STRESS	84	-0.478439	-1.52759	0.00521376	0.04651	1	4341	tags=42%, list=23%, signal=54%
GO_RAS_GUANYL_NUCLEOTIDE_EXCHANGE_FACTOR_ACTIVITY	115	-0.458958	-1.52719	0.00204082	0.046678	1	3659	tags=35%, list=19%, signal=43%
GO_POSITIVE_REGULATION_OF_CELL_MIGRATION_INVOLVED_IN_SPROUTING_ANGIOGENESIS	21	-0.581857	-1.52718	0.0235149	0.046649	1	1647	tags=33%, list=9%, signal=36%
GO_MUSCLE_ORGAN_MORPHOGENESIS	79	-0.47171	-1.52717	0.00742312	0.0466278	1	3246	tags=33%, list=17%, signal=40%
GO_REGULATION_OF_CELL_FATE_COMMITMENT	30	-0.542994	-1.52637	0.0280702	0.0469689	1	2888	tags=43%, list=15%, signal=51%
GO_RESPONSE_TO_ETHANOL	120	-0.455598	-1.52572	0	0.0472597	1	3556	tags=31%, list=19%, signal=38%
GO_POSITIVE_REGULATION_OF_LIPID_BIOSYNTHETIC_PROCESS	84	-0.474803	-1.52567	0.00104275	0.0472486	1	6185	tags=56%, list=32%, signal=82%
GO_NEGATIVE_REGULATION_OF_CAMP_MEDIATED_SIGNALING	24	-0.561879	-1.52559	0.0271547	0.0472372	1	1949	tags=29%, list=10%, signal=32%
GO_ACTIVATING_TRANSCRIPTION_FACTOR_BINDING	80	-0.478444	-1.52527	0.00310238	0.0473612	1	3715	tags=29%, list=20%, signal=36%
GO_ACTIN_BINDING	436	-0.436513	-1.52523	0	0.0473244	1	4551	tags=35%, list=24%, signal=45%
GO_RENAL_TUBULE_DEVELOPMENT	95	-0.46633	-1.5251	0.00103842	0.0473572	1	4551	tags=44%, list=24%, signal=58%
GO_CALCIUM_MEDIATED_SIGNALING_USING_INTRACELLULAR_CALCIUM_SOURCE	22	-0.567055	-1.52489	0.0275344	0.0474391	1	4825	tags=45%, list=25%, signal=61%
GO_FICOLIN_1_RICH_GRANULE_MEMBRANE	60	-0.491518	-1.52479	0.00859291	0.0474656	1	7534	tags=65%, list=40%, signal=107%
GO_REGULATION_OF_CARTILAGE_DEVELOPMENT	69	-0.484027	-1.5246	0.0052521	0.0475215	1	4568	tags=43%, list=24%, signal=57%
GO_REGULATION_OF_PLASMA_LIPOPROTEIN_PARTICLE_LEVELS	87	-0.468709	-1.52448	0	0.0475649	1	4085	tags=30%, list=21%, signal=38%
GO_REGULATION_OF_MACROPHAGE_CHEMOTAXIS	29	-0.546618	-1.52438	0.0235849	0.0475872	1	4832	tags=48%, list=25%, signal=65%
GO_ORGAN_GROWTH	166	-0.447525	-1.52427	0	0.0475858	1	3374	tags=30%, list=18%, signal=36%
GO_BRANCHING_INVOLVED_IN_BLOOD_VESSEL_MORPHOGENESIS	33	-0.534204	-1.52407	0.0243337	0.0476307	1	2271	tags=27%, list=12%, signal=31%
GO_RESPONSE_TO_VITAMIN_D	34	-0.524353	-1.5238	0.00587544	0.0477305	1	3472	tags=38%, list=18%, signal=47%
GO_GLYCOSYL_COMPOUND_CATABOLIC_PROCESS	41	-0.516446	-1.52358	0.0144766	0.0477998	1	3929	tags=39%, list=21%, signal=49%
GO_POSITIVE_REGULATION_OF_IMMUNOGLOBULIN_PRODUCTION	43	-0.512125	-1.52339	0.0134983	0.0478655	1	3023	tags=42%, list=16%, signal=50%
GO_NEGATIVE_REGULATION_OF_G_PROTEIN_COUPLED_RECEPTOR_SIGNALING_PATHWAY	51	-0.500215	-1.52287	0.0109529	0.0480934	1	4679	tags=45%, list=25%, signal=60%
GO_MOVEMENT_IN_HOST_ENVIRONMENT	168	-0.447699	-1.52287	0	0.0480645	1	3738	tags=33%, list=20%, signal=41%
GO_REGULATION_OF_RESPONSE_TO_BIOTIC_STIMULUS	393	-0.437195	-1.52275	0	0.0480986	1	4861	tags=40%, list=26%, signal=52%
GO_NEGATIVE_REGULATION_OF_I_KAPPAB_KINASE_NF_KAPPAB_SIGNALING	46	-0.50531	-1.52207	0.00681818	0.048431	1	4355	tags=43%, list=23%, signal=56%
GO_OLIGODENDROCYTE_DIFFERENTIATION	96	-0.465946	-1.52184	0.00311203	0.048518	1	4734	tags=38%, list=25%, signal=50%
GO_VENTRICULAR_CARDIAC_MUSCLE_CELL_ACTION_POTENTIAL	34	-0.532019	-1.52178	0.022093	0.0485226	1	4248	tags=44%, list=22%, signal=57%
GO_REGULATION_OF_ACTIN_FILAMENT_LENGTH	188	-0.44884	-1.52168	0	0.048538	1	2473	tags=28%, list=13%, signal=31%
GO_RESPONSE_TO_MURAMYL_DIPEPTIDE	20	-0.591341	-1.52165	0.0207824	0.0485273	1	4290	tags=60%, list=23%, signal=77%
GO_CELLULAR_HORMONE_METABOLIC_PROCESS	134	-0.460051	-1.5216	0.00101729	0.0485232	1	5718	tags=45%, list=30%, signal=64%
GO_REGULATION_OF_TRANSMEMBRANE_RECEPTOR_PROTEIN_SERINE_THREONINE_KINASE_SIGNALING_PATHWAY	239	-0.442504	-1.52135	0	0.04862	1	4142	tags=34%, list=22%, signal=43%
GO_REGULATION_OF_PEPTIDYL_SERINE_PHOSPHORYLATION	143	-0.458661	-1.52079	0.00100503	0.0488855	1	4572	tags=36%, list=24%, signal=47%
GO_VASCULAR_ENDOTHELIAL_CELL_PROLIFERATION	21	-0.571496	-1.52052	0.0321429	0.0489635	1	3627	tags=48%, list=19%, signal=59%
GO_STRIATED_MUSCLE_CONTRACTION	170	-0.448363	-1.5204	0	0.0490009	1	4571	tags=37%, list=24%, signal=48%
GO_BONE_MORPHOGENESIS	93	-0.468128	-1.52001	0.00311203	0.0491638	1	3879	tags=38%, list=20%, signal=47%
GO_METANEPHROS_DEVELOPMENT	90	-0.462648	-1.51977	0.00829016	0.0492696	1	4455	tags=37%, list=23%, signal=48%
GO_PEPTIDE_CROSS_LINKING	34	-0.532308	-1.51961	0.0182648	0.049328	1	4101	tags=41%, list=22%, signal=52%
GO_NEGATIVE_REGULATION_OF_ION_TRANSMEMBRANE_TRANSPORT	93	-0.46708	-1.51942	0.00520833	0.0493353	1	4593	tags=32%, list=24%, signal=42%
GO_REGULATION_OF_CELLULAR_RESPONSE_TO_INSULIN_STIMULUS	72	-0.479502	-1.51897	0.00849257	0.0495562	1	4401	tags=42%, list=23%, signal=54%
GO_REGULATION_OF_HORMONE_METABOLIC_PROCESS	32	-0.536683	-1.51861	0.0244755	0.049708	1	5694	tags=59%, list=30%, signal=85%
GO_FIBROBLAST_GROWTH_FACTOR_RECEPTOR_BINDING	25	-0.551349	-1.51844	0.0229192	0.0497619	1	2393	tags=32%, list=13%, signal=37%
GO_NEGATIVE_REGULATION_OF_VIRAL_GENOME_REPLICATION	59	-0.484278	-1.5184	0.01606	0.0497567	1	4189	tags=37%, list=22%, signal=48%
GO_POSITIVE_REGULATION_OF_SUBSTRATE_ADHESION_DEPENDENT_CELL_SPREADING	38	-0.515342	-1.51825	0.0137773	0.0498039	1	3874	tags=32%, list=20%, signal=40%
GO_CARDIAC_MUSCLE_CONTRACTION	133	-0.44924	-1.51798	0.0010142	0.0499082	1	4571	tags=37%, list=24%, signal=48%
GO_IMMUNOGLOBULIN_PRODUCTION	119	-0.458108	-1.5177	0.00102249	0.0500426	1	4285	tags=46%, list=22%, signal=59%
GO_CYTOPLASMIC_SIDE_OF_MEMBRANE	186	-0.446274	-1.51746	0.0010101	0.050129	1	3958	tags=35%, list=21%, signal=44%
GO_LAMELLIPODIUM_ORGANIZATION	84	-0.465052	-1.51687	0.00728408	0.050378	1	4313	tags=32%, list=23%, signal=41%
GO_EPITHELIAL_CELL_DEVELOPMENT	215	-0.441764	-1.51629	0	0.0505945	1	4356	tags=36%, list=23%, signal=47%
GO_ENTRAINMENT_OF_CIRCADIAN_CLOCK	33	-0.523889	-1.51584	0.0135287	0.0507728	1	4375	tags=36%, list=23%, signal=47%
GO_POSITIVE_REGULATION_OF_GLYCOPROTEIN_METABOLIC_PROCESS	24	-0.559603	-1.5154	0.0280146	0.0509508	1	2222	tags=29%, list=12%, signal=33%
GO_POSITIVE_REGULATION_OF_ACTIN_FILAMENT_POLYMERIZATION	99	-0.463345	-1.5154	0.00514933	0.0509213	1	2440	tags=27%, list=13%, signal=31%
GO_EPIBOLY	33	-0.524756	-1.5143	0.0166074	0.0514393	1	4627	tags=45%, list=24%, signal=60%
GO_C21_STEROID_HORMONE_METABOLIC_PROCESS	40	-0.509884	-1.51385	0.0181406	0.0516502	1	4887	tags=48%, list=26%, signal=64%
GO_LIPID_STORAGE	79	-0.468277	-1.51382	0.010395	0.0516378	1	5060	tags=47%, list=27%, signal=64%
GO_ENZYME_INHIBITOR_ACTIVITY	373	-0.434541	-1.5138	0	0.051622	1	5350	tags=39%, list=28%, signal=53%
GO_LIPID_TRANSPORTER_ACTIVITY	132	-0.448763	-1.51347	0	0.0517756	1	3515	tags=29%, list=18%, signal=35%
GO_MONOCARBOXYLIC_ACID_BINDING	72	-0.474616	-1.51344	0.00535332	0.0517582	1	4372	tags=39%, list=23%, signal=50%
GO_NEGATIVE_REGULATION_OF_OXIDOREDUCTASE_ACTIVITY	30	-0.535629	-1.51341	0.0280702	0.0517483	1	5174	tags=50%, list=27%, signal=69%
GO_REGULATION_OF_DNA_BINDING_TRANSCRIPTION_FACTOR_ACTIVITY	426	-0.434723	-1.51306	0	0.0518705	1	4024	tags=36%, list=21%, signal=45%
GO_MUSCLE_CELL_DEVELOPMENT	168	-0.448398	-1.51254	0	0.0520965	1	3509	tags=30%, list=18%, signal=37%
GO_HORMONE_METABOLIC_PROCESS	221	-0.440182	-1.51205	0	0.0523001	1	5722	tags=44%, list=30%, signal=63%
GO_AORTA_MORPHOGENESIS	30	-0.547008	-1.51197	0.022646	0.0523182	1	4784	tags=57%, list=25%, signal=76%
GO_REGULATION_OF_CATION_CHANNEL_ACTIVITY	176	-0.441684	-1.51158	0	0.0525171	1	4254	tags=34%, list=22%, signal=43%
GO_OSTEOCLAST_DIFFERENTIATION	98	-0.466807	-1.51148	0.00205761	0.052541	1	6016	tags=53%, list=32%, signal=77%
GO_CARDIAC_MUSCLE_CELL_ACTION_POTENTIAL_INVOLVED_IN_CONTRACTION	51	-0.49944	-1.5112	0.0155729	0.0526528	1	4248	tags=43%, list=22%, signal=55%
GO_MUSCLE_CELL_APOPTOTIC_PROCESS	67	-0.478526	-1.51118	0.00839454	0.052633	1	5160	tags=45%, list=27%, signal=61%
GO_VASCULAR_ENDOTHELIAL_GROWTH_FACTOR_PRODUCTION	36	-0.519549	-1.51063	0.0217391	0.0528733	1	3859	tags=39%, list=20%, signal=49%
GO_ENDOCARDIAL_CUSHION_MORPHOGENESIS	35	-0.519137	-1.51032	0.0182857	0.0530113	1	4700	tags=46%, list=25%, signal=61%
GO_POTASSIUM_CHANNEL_REGULATOR_ACTIVITY	52	-0.493484	-1.51016	0.0163221	0.0530666	1	4000	tags=37%, list=21%, signal=46%
GO_NEGATIVE_REGULATION_OF_PRODUCTION_OF_MOLECULAR_MEDIATOR_OF_IMMUNE_RESPONSE	35	-0.525186	-1.51012	0.0216155	0.0530609	1	6000	tags=63%, list=31%, signal=92%
GO_GAS_TRANSPORT	20	-0.58234	-1.50935	0.0298137	0.0533478	1	3901	tags=40%, list=20%, signal=50%
GO_REGULATION_OF_OXIDOREDUCTASE_ACTIVITY	105	-0.462002	-1.5087	0.00207254	0.0536197	1	5217	tags=48%, list=27%, signal=65%
GO_REGULATION_OF_ION_TRANSMEMBRANE_TRANSPORT	474	-0.43146	-1.50861	0	0.0536409	1	4614	tags=35%, list=24%, signal=45%
GO_POSITIVE_REGULATION_OF_CHONDROCYTE_DIFFERENTIATION	20	-0.587401	-1.50849	0.0217114	0.0536438	1	2913	tags=40%, list=15%, signal=47%
GO_MEMBRANE_DEPOLARIZATION	85	-0.46448	-1.50837	0.00208117	0.0536727	1	3432	tags=28%, list=18%, signal=34%
GO_MAP_KINASE_KINASE_KINASE_ACTIVITY	24	-0.555485	-1.50818	0.0361011	0.0537535	1	1721	tags=25%, list=9%, signal=27%
GO_REGULATION_OF_AMYLOID_PRECURSOR_PROTEIN_CATABOLIC_PROCESS	38	-0.517592	-1.50779	0.0149254	0.0539333	1	4381	tags=42%, list=23%, signal=55%
GO_VITAMIN_D_METABOLIC_PROCESS	22	-0.558362	-1.50752	0.023199	0.0539728	1	5913	tags=64%, list=31%, signal=92%
GO_CELLULAR_RESPONSE_TO_EXTERNAL_STIMULUS	323	-0.436911	-1.50744	0	0.0539814	1	3601	tags=30%, list=19%, signal=36%
GO_POSITIVE_REGULATION_OF_POTASSIUM_ION_TRANSPORT	44	-0.497638	-1.50651	0.0101351	0.0543703	1	4436	tags=43%, list=23%, signal=56%
GO_RETINOIC_ACID_RECEPTOR_SIGNALING_PATHWAY	33	-0.527857	-1.50605	0.0175234	0.0546068	1	5534	tags=48%, list=29%, signal=68%
GO_RECEPTOR_MEDIATED_ENDOCYTOSIS	269	-0.438659	-1.50603	0	0.0545838	1	4024	tags=31%, list=21%, signal=39%
GO_INSULIN_LIKE_GROWTH_FACTOR_BINDING	29	-0.539943	-1.50601	0.0305164	0.0545598	1	4100	tags=45%, list=22%, signal=57%
GO_POSITIVE_REGULATION_OF_GLYCOPROTEIN_BIOSYNTHETIC_PROCESS	22	-0.566712	-1.50559	0.025393	0.0547347	1	2222	tags=32%, list=12%, signal=36%
GO_PHOSPHATIDYLINOSITOL_3_4_5_TRISPHOSPHATE_BINDING	39	-0.513611	-1.50553	0.0171233	0.0547292	1	3640	tags=38%, list=19%, signal=47%
GO_REGULATION_OF_EPIDERMAL_CELL_DIFFERENTIATION	63	-0.480098	-1.50553	0.0139037	0.0546984	1	5378	tags=52%, list=28%, signal=73%
GO_POSITIVE_REGULATION_OF_AXONOGENESIS	86	-0.467064	-1.50503	0.0084122	0.0549411	1	3817	tags=38%, list=20%, signal=48%
GO_PEPTIDE_HORMONE_BINDING	51	-0.496737	-1.50412	0.0176796	0.0553073	1	5525	tags=51%, list=29%, signal=72%
GO_CELLULAR_OXIDANT_DETOXIFICATION	100	-0.459563	-1.50383	0.00417101	0.0554486	1	4359	tags=38%, list=23%, signal=49%
GO_NEGATIVE_REGULATION_OF_PEPTIDYL_SERINE_PHOSPHORYLATION	28	-0.538268	-1.50381	0.0315052	0.0554281	1	4572	tags=46%, list=24%, signal=61%
GO_SMOOTH_MUSCLE_CELL_APOPTOTIC_PROCESS	23	-0.561326	-1.50369	0.0287081	0.0554662	1	4703	tags=43%, list=25%, signal=58%
GO_CHONDROITIN_SULFATE_PROTEOGLYCAN_BIOSYNTHETIC_PROCESS	31	-0.53211	-1.50359	0.0255814	0.0554903	1	5026	tags=55%, list=26%, signal=74%
GO_NEGATIVE_REGULATION_OF_TRANSMEMBRANE_RECEPTOR_PROTEIN_SERINE_THREONINE_KINASE_SIGNALING_PATHWAY	121	-0.448374	-1.50354	0.00102354	0.0554756	1	4011	tags=33%, list=21%, signal=42%
GO_NEGATIVE_REGULATION_OF_FAT_CELL_DIFFERENTIATION	48	-0.494977	-1.50286	0.0156775	0.0558202	1	3429	tags=38%, list=18%, signal=46%
GO_CELL_JUNCTION_ASSEMBLY	430	-0.429275	-1.50216	0	0.0561716	1	4512	tags=33%, list=24%, signal=43%
GO_HEART_FORMATION	30	-0.528722	-1.50206	0.0280702	0.0561957	1	2841	tags=33%, list=15%, signal=39%
GO_GAP_JUNCTION_CHANNEL_ACTIVITY	21	-0.569599	-1.50188	0.022864	0.0562037	1	3236	tags=33%, list=17%, signal=40%
GO_TRANSCRIPTION_COACTIVATOR_BINDING	29	-0.527477	-1.50169	0.0238379	0.0562478	1	2975	tags=34%, list=16%, signal=41%
GO_LUNG_MORPHOGENESIS	51	-0.488833	-1.50122	0.0163399	0.0564923	1	2785	tags=31%, list=15%, signal=37%
GO_NEGATIVE_REGULATION_OF_KINASE_ACTIVITY	252	-0.4342	-1.50092	0	0.0566424	1	3774	tags=33%, list=20%, signal=41%
GO_RESPONSE_TO_INTERLEUKIN_4	34	-0.52093	-1.5008	0.0221704	0.0566705	1	5378	tags=56%, list=28%, signal=78%
GO_POSITIVE_REGULATION_OF_DEFENSE_RESPONSE_TO_VIRUS_BY_HOST	29	-0.536628	-1.50077	0.0298329	0.0566514	1	5545	tags=59%, list=29%, signal=83%
GO_REGULATION_OF_G_PROTEIN_COUPLED_RECEPTOR_SIGNALING_PATHWAY	144	-0.447359	-1.50036	0.0040404	0.0568146	1	5374	tags=41%, list=28%, signal=57%
GO_POSITIVE_REGULATION_OF_CARDIOCYTE_DIFFERENTIATION	27	-0.536148	-1.5	0.028136	0.0569876	1	3761	tags=41%, list=20%, signal=51%
GO_POSITIVE_REGULATION_OF_FATTY_ACID_BIOSYNTHETIC_PROCESS	21	-0.565067	-1.49979	0.0290909	0.0570853	1	4525	tags=52%, list=24%, signal=69%
GO_NEGATIVE_REGULATION_OF_HYDROLASE_ACTIVITY	444	-0.430715	-1.49929	0	0.0573479	1	4541	tags=34%, list=24%, signal=44%
GO_NEGATIVE_REGULATION_OF_CELL_GROWTH	186	-0.440524	-1.49926	0	0.0573395	1	4677	tags=37%, list=25%, signal=48%
GO_STRIATED_MUSCLE_THIN_FILAMENT	22	-0.568492	-1.4989	0.0276382	0.0574652	1	3087	tags=41%, list=16%, signal=49%
GO_BONE_DEVELOPMENT	202	-0.440971	-1.4989	0	0.0574338	1	5366	tags=46%, list=28%, signal=63%
GO_REGULATION_OF_SUPEROXIDE_ANION_GENERATION	22	-0.564894	-1.49824	0.0317073	0.0577552	1	4686	tags=55%, list=25%, signal=72%
GO_NEGATIVE_REGULATION_OF_BLOOD_PRESSURE	46	-0.495932	-1.49775	0.0246637	0.0579872	1	3509	tags=33%, list=18%, signal=40%
GO_ORGANIC_HYDROXY_COMPOUND_TRANSMEMBRANE_TRANSPORTER_ACTIVITY	47	-0.494153	-1.49774	0.0121012	0.0579595	1	4915	tags=45%, list=26%, signal=60%
GO_GOLGI_LUMEN	101	-0.457551	-1.4976	0.00516529	0.0580084	1	5796	tags=46%, list=30%, signal=65%
GO_RELEASE_OF_SEQUESTERED_CALCIUM_ION_INTO_CYTOSOL_BY_ENDOPLASMIC_RETICULUM	33	-0.525401	-1.4975	0.0336037	0.0580415	1	4826	tags=42%, list=25%, signal=57%
GO_RENAL_VESICLE_DEVELOPMENT	20	-0.57217	-1.49745	0.0479798	0.0580314	1	2577	tags=35%, list=14%, signal=40%
GO_MULTI_MULTICELLULAR_ORGANISM_PROCESS	219	-0.436678	-1.49706	0	0.058226	1	5316	tags=42%, list=28%, signal=57%
GO_BRANCHING_INVOLVED_IN_SALIVARY_GLAND_MORPHOGENESIS	23	-0.565748	-1.49694	0.039555	0.0582566	1	3859	tags=48%, list=20%, signal=60%
GO_NEGATIVE_REGULATION_OF_JNK_CASCADE	37	-0.517541	-1.49693	0.0148912	0.0582269	1	4009	tags=41%, list=21%, signal=51%
GO_CELLULAR_RESPONSE_TO_REACTIVE_OXYGEN_SPECIES	157	-0.441524	-1.49657	0.00101317	0.0584136	1	4846	tags=41%, list=25%, signal=54%
GO_ETHANOL_METABOLIC_PROCESS	22	-0.570029	-1.49654	0.026764	0.0584014	1	6460	tags=59%, list=34%, signal=89%
GO_REGULATION_OF_MUSCLE_ORGAN_DEVELOPMENT	135	-0.448839	-1.49628	0.00101729	0.0585166	1	3374	tags=29%, list=18%, signal=35%
GO_NEGATIVE_REGULATION_OF_PROTEOLYSIS	345	-0.429611	-1.49617	0	0.0585474	1	4515	tags=32%, list=24%, signal=42%
GO_PROTEIN_LOCALIZATION_TO_CELL_SURFACE	64	-0.473215	-1.49605	0.0150862	0.058573	1	2997	tags=30%, list=16%, signal=35%
GO_CONNEXIN_COMPLEX	21	-0.569599	-1.49573	0.0437424	0.0586642	1	3236	tags=33%, list=17%, signal=40%
GO_NEGATIVE_REGULATION_OF_PHAGOCYTOSIS	20	-0.581131	-1.49558	0.0377834	0.0587237	1	4593	tags=45%, list=24%, signal=59%
GO_FRIZZLED_BINDING	38	-0.513643	-1.49547	0.0202703	0.0587273	1	5423	tags=50%, list=28%, signal=70%
GO_CARDIAC_MUSCLE_CELL_MEMBRANE_REPOLARIZATION	36	-0.523656	-1.49541	0.0193622	0.0587254	1	4248	tags=47%, list=22%, signal=61%
GO_GASTRULATION	182	-0.439886	-1.49506	0	0.0588769	1	2907	tags=27%, list=15%, signal=31%
GO_FATTY_ACID_TRANSPORT	101	-0.454048	-1.49492	0.00309278	0.058928	1	3988	tags=34%, list=21%, signal=42%
GO_POSITIVE_REGULATION_OF_MONONUCLEAR_CELL_MIGRATION	25	-0.555136	-1.49481	0.0297619	0.0589593	1	4284	tags=48%, list=22%, signal=62%
GO_CELLULAR_COMPONENT_ASSEMBLY_INVOLVED_IN_MORPHOGENESIS	109	-0.447121	-1.4943	0.00411523	0.0592295	1	3087	tags=28%, list=16%, signal=33%
GO_REGULATION_OF_MONOOXYGENASE_ACTIVITY	56	-0.486274	-1.49348	0.0151515	0.0596137	1	5504	tags=55%, list=29%, signal=78%
GO_FORMATION_OF_PRIMARY_GERM_LAYER	122	-0.454149	-1.49345	0.00203459	0.0595981	1	2584	tags=26%, list=14%, signal=30%
GO_REGULATION_OF_SODIUM_ION_TRANSMEMBRANE_TRANSPORTER_ACTIVITY	54	-0.482684	-1.4934	0.0188053	0.059591	1	2839	tags=28%, list=15%, signal=33%
GO_REGULATION_OF_SODIUM_ION_TRANSPORT	86	-0.461585	-1.49328	0.00625652	0.0596313	1	4590	tags=37%, list=24%, signal=49%
GO_NEGATIVE_REGULATION_OF_PHOSPHORYLATION	445	-0.42971	-1.49292	0	0.059804	1	3864	tags=33%, list=20%, signal=40%
GO_HYDROLASE_ACTIVITY_HYDROLYZING_N_GLYCOSYL_COMPOUNDS	34	-0.515842	-1.49273	0.0299885	0.0598965	1	4289	tags=50%, list=23%, signal=64%
GO_PLACENTA_BLOOD_VESSEL_DEVELOPMENT	33	-0.51607	-1.49254	0.0296912	0.0599692	1	4491	tags=39%, list=24%, signal=51%
GO_REGULATION_OF_AMYLOID_BETA_FORMATION	32	-0.527915	-1.49161	0.0197445	0.0603726	1	4381	tags=44%, list=23%, signal=57%
GO_CARDIAC_CHAMBER_DEVELOPMENT	170	-0.441889	-1.49153	0.0010142	0.0603884	1	3335	tags=31%, list=18%, signal=37%
GO_POSITIVE_REGULATION_OF_VASCULAR_ASSOCIATED_SMOOTH_MUSCLE_CELL_PROLIFERATION	34	-0.521847	-1.49132	0.0149942	0.0604867	1	4348	tags=35%, list=23%, signal=46%
GO_RHO_GUANYL_NUCLEOTIDE_EXCHANGE_FACTOR_ACTIVITY	60	-0.48332	-1.49132	0.0130152	0.0604563	1	3659	tags=42%, list=19%, signal=51%
GO_REGULATION_OF_NERVOUS_SYSTEM_PROCESS	145	-0.44201	-1.49071	0.0010142	0.0607721	1	4826	tags=36%, list=25%, signal=48%
GO_NEGATIVE_REGULATION_OF_ORGANIC_ACID_TRANSPORT	23	-0.55508	-1.48973	0.0347722	0.0613211	1	1094	tags=17%, list=6%, signal=18%
GO_REGULATION_OF_KIDNEY_DEVELOPMENT	55	-0.487681	-1.48959	0.00854701	0.0613753	1	3957	tags=40%, list=21%, signal=50%
GO_PROTEIN_KINASE_C_ACTIVATING_G_PROTEIN_COUPLED_RECEPTOR_SIGNALING_PATHWAY	28	-0.533949	-1.48946	0.0276442	0.0613796	1	3715	tags=39%, list=20%, signal=49%
GO_NEGATIVE_REGULATION_OF_ANIMAL_ORGAN_MORPHOGENESIS	34	-0.507519	-1.48922	0.0277136	0.0614875	1	3970	tags=38%, list=21%, signal=48%
GO_POSITIVE_REGULATION_OF_TISSUE_REMODELING	32	-0.528428	-1.48873	0.0265896	0.061745	1	5169	tags=56%, list=27%, signal=77%
GO_CELL_CELL_ADHESION_MEDIATED_BY_CADHERIN	28	-0.539517	-1.48842	0.026506	0.0618767	1	1265	tags=25%, list=7%, signal=27%
GO_LONG_TERM_SYNAPTIC_POTENTIATION	86	-0.453936	-1.48809	0.0104275	0.0620003	1	5921	tags=47%, list=31%, signal=67%
GO_NEGATIVE_REGULATION_OF_PROTEIN_MATURATION	31	-0.524429	-1.48778	0.0323699	0.0621455	1	2216	tags=29%, list=12%, signal=33%
GO_REGULATION_OF_CAMP_MEDIATED_SIGNALING	51	-0.483937	-1.48712	0.0209482	0.0624614	1	6278	tags=55%, list=33%, signal=82%
GO_RESPONSE_TO_LEPTIN	24	-0.548563	-1.48696	0.0332937	0.0625363	1	1342	tags=25%, list=7%, signal=27%
GO_PINOCYTOSIS	23	-0.553789	-1.48694	0.0315534	0.062512	1	4085	tags=39%, list=21%, signal=50%
GO_NEGATIVE_REGULATION_OF_LIPID_LOCALIZATION	44	-0.497495	-1.48646	0.0125	0.0627618	1	4085	tags=36%, list=21%, signal=46%
GO_STRIATED_MUSCLE_CELL_PROLIFERATION	65	-0.476262	-1.48624	0.0063762	0.0628405	1	4491	tags=40%, list=24%, signal=52%
GO_SIALYLATION	20	-0.559904	-1.48593	0.0362954	0.0629227	1	2842	tags=40%, list=15%, signal=47%
GO_POSITIVE_REGULATION_OF_ENDOCYTOSIS	99	-0.454012	-1.48559	0.00721649	0.0630897	1	4495	tags=39%, list=24%, signal=51%
GO_SEMAPHORIN_RECEPTOR_BINDING	23	-0.546119	-1.48491	0.0428397	0.0634233	1	5631	tags=65%, list=30%, signal=92%
GO_MYOFILAMENT	26	-0.546052	-1.48458	0.0419162	0.0635896	1	3087	tags=38%, list=16%, signal=46%
GO_CALCIUM_DEPENDENT_PROTEIN_BINDING	80	-0.465035	-1.48449	0.00843882	0.0636135	1	3874	tags=31%, list=20%, signal=39%
GO_TRANSMEMBRANE_RECEPTOR_PROTEIN_SERINE_THREONINE_KINASE_SIGNALING_PATHWAY	339	-0.429292	-1.48398	0	0.0638795	1	3816	tags=30%, list=20%, signal=37%
GO_DETOXIFICATION	134	-0.448993	-1.48375	0.00101937	0.0639908	1	4359	tags=35%, list=23%, signal=45%
GO_LAMELLIPODIUM_ASSEMBLY	66	-0.47102	-1.48373	0.00638298	0.0639655	1	4313	tags=35%, list=23%, signal=45%
GO_PYRIMIDINE_NUCLEOSIDE_METABOLIC_PROCESS	36	-0.509736	-1.48302	0.0334487	0.0643555	1	2351	tags=28%, list=12%, signal=32%
GO_REGULATION_OF_GASTRULATION	38	-0.506374	-1.48279	0.0213723	0.0644713	1	2186	tags=24%, list=11%, signal=27%
GO_REGULATION_OF_ENDOTHELIAL_CELL_CHEMOTAXIS	21	-0.55831	-1.48277	0.0454545	0.0644444	1	5969	tags=57%, list=31%, signal=83%
GO_VENTRICULAR_CARDIAC_MUSCLE_CELL_MEMBRANE_REPOLARIZATION	26	-0.544831	-1.48256	0.034689	0.0645014	1	4248	tags=50%, list=22%, signal=64%
GO_REGULATION_OF_DEFENSE_RESPONSE_TO_VIRUS	77	-0.460046	-1.48223	0.0114823	0.0646733	1	4284	tags=39%, list=22%, signal=50%
GO_RESPONSE_TO_NUTRIENT	167	-0.440158	-1.48181	0	0.0649154	1	4411	tags=35%, list=23%, signal=45%
GO_ORGANIC_HYDROXY_COMPOUND_TRANSPORT	250	-0.432041	-1.4811	0	0.0652536	1	5174	tags=39%, list=27%, signal=53%
GO_TUMOR_NECROSIS_FACTOR_MEDIATED_SIGNALING_PATHWAY	166	-0.437791	-1.48026	0.00201816	0.065781	1	4391	tags=34%, list=23%, signal=44%
GO_POSITIVE_REGULATION_OF_FILOPODIUM_ASSEMBLY	30	-0.518989	-1.4799	0.0289687	0.0659698	1	4147	tags=50%, list=22%, signal=64%
GO_POSITIVE_REGULATION_OF_SMOOTH_MUSCLE_CELL_MIGRATION	38	-0.512511	-1.47977	0.0260476	0.0660233	1	4784	tags=42%, list=25%, signal=56%
GO_EXCRETION	65	-0.472729	-1.47956	0.00957447	0.0659856	1	4348	tags=31%, list=23%, signal=40%
GO_NOTCH_SIGNALING_PATHWAY	189	-0.433178	-1.47945	0.001002	0.0660128	1	4491	tags=34%, list=24%, signal=45%
GO_RESPONSE_TO_MINERALOCORTICOID	32	-0.518201	-1.47933	0.0367816	0.0660688	1	2449	tags=31%, list=13%, signal=36%
GO_CARDIAC_MUSCLE_CELL_ACTION_POTENTIAL	69	-0.464502	-1.47932	0.012848	0.0660391	1	3115	tags=32%, list=16%, signal=38%
GO_CELL_COMMUNICATION_INVOLVED_IN_CARDIAC_CONDUCTION	54	-0.482308	-1.4792	0.0197585	0.0660856	1	4471	tags=41%, list=23%, signal=53%
GO_REGULATION_OF_INSULIN_LIKE_GROWTH_FACTOR_RECEPTOR_SIGNALING_PATHWAY	22	-0.556935	-1.47884	0.0391198	0.0662257	1	4655	tags=50%, list=24%, signal=66%
GO_INTERCALATED_DISC	51	-0.478364	-1.47873	0.0227766	0.0662342	1	3792	tags=29%, list=20%, signal=37%
GO_MEMBRANE_DEPOLARIZATION_DURING_CARDIAC_MUSCLE_CELL_ACTION_POTENTIAL	22	-0.557544	-1.47791	0.0359712	0.0666806	1	3792	tags=50%, list=20%, signal=62%
GO_PROTEIN_PHOSPHORYLATED_AMINO_ACID_BINDING	53	-0.48641	-1.47725	0.0185996	0.0670403	1	4501	tags=42%, list=24%, signal=54%
GO_CORTICAL_ACTIN_CYTOSKELETON	80	-0.458254	-1.47716	0.00835946	0.0670631	1	2475	tags=26%, list=13%, signal=30%
GO_STEROID_HORMONE_SECRETION	20	-0.568137	-1.47705	0.0428212	0.0670962	1	3582	tags=45%, list=19%, signal=55%
GO_CARDIAC_VENTRICLE_MORPHOGENESIS	71	-0.461183	-1.47613	0.0118407	0.0676547	1	3246	tags=32%, list=17%, signal=39%
GO_CARDIAC_MUSCLE_TISSUE_DEVELOPMENT	204	-0.434593	-1.47608	0.00100301	0.0676552	1	3374	tags=28%, list=18%, signal=34%
GO_REGULATION_OF_ENDOCRINE_PROCESS	43	-0.493767	-1.47601	0.0177384	0.0676669	1	3618	tags=37%, list=19%, signal=46%
GO_POSITIVE_REGULATION_OF_BLOOD_PRESSURE	36	-0.519384	-1.47541	0.0279642	0.0680427	1	5546	tags=47%, list=29%, signal=66%
GO_REGULATION_OF_NITRIC_OXIDE_SYNTHASE_ACTIVITY	45	-0.48643	-1.47507	0.0247191	0.0682037	1	3859	tags=42%, list=20%, signal=53%
GO_CARBOHYDRATE_DERIVATIVE_CATABOLIC_PROCESS	190	-0.430879	-1.47436	0	0.0686263	1	3989	tags=32%, list=21%, signal=40%
GO_FLUID_TRANSPORT	28	-0.529681	-1.47429	0.037296	0.0686321	1	4705	tags=50%, list=25%, signal=66%
GO_FIBROBLAST_PROLIFERATION	82	-0.461848	-1.47424	0.00842993	0.0686313	1	3528	tags=38%, list=19%, signal=46%
GO_REGULATION_OF_NOTCH_SIGNALING_PATHWAY	103	-0.448642	-1.47421	0.0061792	0.0686143	1	4491	tags=34%, list=24%, signal=44%
GO_NEGATIVE_REGULATION_OF_CELLULAR_RESPONSE_TO_INSULIN_STIMULUS	32	-0.516504	-1.47392	0.0374707	0.0686922	1	4401	tags=50%, list=23%, signal=65%
GO_PHOSPHATIDIC_ACID_METABOLIC_PROCESS	51	-0.478934	-1.47391	0.0267857	0.0686606	1	3256	tags=35%, list=17%, signal=42%
GO_MYD88_INDEPENDENT_TOLL_LIKE_RECEPTOR_SIGNALING_PATHWAY	34	-0.511001	-1.47336	0.0375147	0.0689911	1	4935	tags=50%, list=26%, signal=67%
GO_PLASMA_LIPOPROTEIN_PARTICLE_CLEARANCE	52	-0.478161	-1.47274	0.0185185	0.0692477	1	5132	tags=38%, list=27%, signal=52%
GO_REGULATION_OF_MESENCHYMAL_CELL_PROLIFERATION	33	-0.515189	-1.47235	0.0252294	0.069478	1	3528	tags=42%, list=19%, signal=52%
GO_CELL_CELL_JUNCTION_ASSEMBLY	145	-0.436752	-1.47187	0.00304569	0.0696918	1	3675	tags=29%, list=19%, signal=36%
GO_FILOPODIUM	104	-0.44571	-1.47164	0.0101833	0.0698099	1	4425	tags=35%, list=23%, signal=45%
GO_POSITIVE_REGULATION_OF_HEART_CONTRACTION	40	-0.499702	-1.47156	0.0236753	0.0698367	1	5525	tags=52%, list=29%, signal=74%
GO_PHASIC_SMOOTH_MUSCLE_CONTRACTION	21	-0.563689	-1.47077	0.0366748	0.0702148	1	3284	tags=38%, list=17%, signal=46%
GO_POSITIVE_REGULATION_OF_PROTEIN_SERINE_THREONINE_KINASE_ACTIVITY	340	-0.425516	-1.47021	0	0.0705549	1	3992	tags=34%, list=21%, signal=42%
GO_RESPONSE_TO_STEROID_HORMONE	341	-0.423961	-1.46995	0	0.0706959	1	3893	tags=32%, list=20%, signal=40%
GO_NEGATIVE_REGULATION_OF_BMP_SIGNALING_PATHWAY	49	-0.482125	-1.46963	0.0283843	0.0708803	1	4640	tags=41%, list=24%, signal=54%
GO_CYCLIC_NUCLEOTIDE_BIOSYNTHETIC_PROCESS	22	-0.549653	-1.46939	0.0476191	0.0710082	1	3867	tags=36%, list=20%, signal=46%
GO_PLASMINOGEN_ACTIVATION	23	-0.543685	-1.46862	0.0392157	0.0714654	1	1730	tags=22%, list=9%, signal=24%
GO_ACTION_POTENTIAL	132	-0.439461	-1.46859	0.00405269	0.0714111	1	4375	tags=36%, list=23%, signal=46%
GO_STEROL_TRANSPORT	101	-0.447455	-1.46857	0.00827301	0.071385	1	4201	tags=33%, list=22%, signal=42%
GO_RAS_PROTEIN_SIGNAL_TRANSDUCTION	344	-0.42337	-1.46763	0	0.0718566	1	5037	tags=41%, list=26%, signal=55%
GO_FILOPODIUM_ASSEMBLY	61	-0.47013	-1.46729	0.0195652	0.0720179	1	4147	tags=39%, list=22%, signal=50%
GO_NEGATIVE_REGULATION_OF_LIPID_METABOLIC_PROCESS	89	-0.450805	-1.46631	0.0125654	0.0725223	1	3969	tags=35%, list=21%, signal=44%
GO_EPITHELIAL_TUBE_MORPHOGENESIS	322	-0.422109	-1.46628	0	0.0724998	1	4980	tags=39%, list=26%, signal=52%
GO_ASTROCYTE_ACTIVATION	23	-0.543101	-1.46592	0.0380835	0.0726928	1	4157	tags=48%, list=22%, signal=61%
GO_KILLING_OF_CELLS_IN_OTHER_ORGANISM_INVOLVED_IN_SYMBIOTIC_INTERACTION	27	-0.529615	-1.46587	0.0380499	0.0726929	1	3225	tags=30%, list=17%, signal=36%
GO_T_CELL_HOMEOSTASIS	38	-0.50537	-1.46556	0.0249433	0.0728742	1	4158	tags=45%, list=22%, signal=57%
GO_PHOSPHATIDYLINOSITOL_3_PHOSPHATE_BINDING	46	-0.484655	-1.46546	0.0248307	0.0728707	1	3054	tags=35%, list=16%, signal=41%
GO_SKELETAL_SYSTEM_MORPHOGENESIS	224	-0.428886	-1.4653	0	0.0729538	1	5146	tags=41%, list=27%, signal=56%
GO_INSULIN_LIKE_GROWTH_FACTOR_RECEPTOR_SIGNALING_PATHWAY	34	-0.505302	-1.46505	0.0396376	0.0730475	1	2860	tags=32%, list=15%, signal=38%
GO_HEART_PROCESS	281	-0.423772	-1.46441	0	0.0733899	1	4571	tags=33%, list=24%, signal=43%
GO_NEGATIVE_REGULATION_OF_ERBB_SIGNALING_PATHWAY	52	-0.478306	-1.46439	0.0220507	0.0733627	1	3717	tags=35%, list=20%, signal=43%
GO_AXIS_ELONGATION	30	-0.515832	-1.4637	0.0384615	0.0737563	1	3529	tags=43%, list=19%, signal=53%
GO_CELLULAR_RESPONSE_TO_DEXAMETHASONE_STIMULUS	31	-0.51459	-1.4636	0.0405562	0.0737931	1	1700	tags=32%, list=9%, signal=35%
GO_KERATAN_SULFATE_BIOSYNTHETIC_PROCESS	28	-0.524162	-1.46326	0.041816	0.0739447	1	2311	tags=29%, list=12%, signal=32%
GO_CELLULAR_RESPONSE_TO_TOXIC_SUBSTANCE	119	-0.443907	-1.46315	0.0020429	0.0739895	1	4359	tags=36%, list=23%, signal=47%
GO_ANTIOXIDANT_ACTIVITY	85	-0.457591	-1.46311	0.0104822	0.0739721	1	4922	tags=39%, list=26%, signal=52%
GO_DEATH_RECEPTOR_BINDING	20	-0.564713	-1.46289	0.0471338	0.0740786	1	3853	tags=45%, list=20%, signal=56%
GO_PROSTATE_GLAND_DEVELOPMENT	48	-0.483607	-1.4628	0.0221729	0.0740913	1	2647	tags=29%, list=14%, signal=34%
GO_REGULATION_OF_DIGESTIVE_SYSTEM_PROCESS	42	-0.492207	-1.46213	0.0265781	0.074477	1	6306	tags=55%, list=33%, signal=82%
GO_REGULATION_OF_CARDIAC_CONDUCTION	67	-0.460527	-1.46192	0.0160256	0.0745775	1	4471	tags=34%, list=23%, signal=45%
GO_HOMEOSTASIS_OF_NUMBER_OF_CELLS	251	-0.423799	-1.46186	0.00100503	0.0745805	1	4895	tags=39%, list=26%, signal=51%
GO_AMINOGLYCAN_BIOSYNTHETIC_PROCESS	115	-0.442042	-1.46169	0.00715746	0.0746553	1	5344	tags=45%, list=28%, signal=62%
GO_HIPPO_SIGNALING	43	-0.491155	-1.46118	0.0192308	0.0749537	1	3374	tags=35%, list=18%, signal=42%
GO_INTERLEUKIN_5_PRODUCTION	20	-0.560417	-1.46105	0.0470297	0.0750008	1	3776	tags=45%, list=20%, signal=56%
GO_RESPONSE_TO_PAIN	30	-0.514997	-1.46103	0.0398633	0.0749752	1	3273	tags=33%, list=17%, signal=40%
GO_REGULATION_OF_SMALL_GTPASE_MEDIATED_SIGNAL_TRANSDUCTION	321	-0.422041	-1.45964	0	0.0758204	1	4147	tags=37%, list=22%, signal=46%
GO_POSITIVE_REGULATION_OF_GROWTH	254	-0.424859	-1.45908	0	0.0761562	1	3817	tags=31%, list=20%, signal=38%
GO_REGULATION_OF_CELL_SUBSTRATE_JUNCTION_ORGANIZATION	66	-0.465405	-1.45906	0.0159744	0.0761284	1	3973	tags=30%, list=21%, signal=38%
GO_CELL_FATE_SPECIFICATION	97	-0.445782	-1.45809	0.00725389	0.0766598	1	4552	tags=34%, list=24%, signal=44%
GO_AMELOGENESIS	24	-0.540172	-1.45735	0.0407186	0.077069	1	4652	tags=54%, list=24%, signal=72%
GO_FEMALE_SEX_DIFFERENTIATION	119	-0.438339	-1.45708	0.00720165	0.0772067	1	4796	tags=35%, list=25%, signal=47%
GO_REGULATION_OF_CELL_JUNCTION_ASSEMBLY	198	-0.428592	-1.45632	0.00402414	0.077726	1	5386	tags=37%, list=28%, signal=52%
GO_SOMATIC_STEM_CELL_POPULATION_MAINTENANCE	74	-0.460391	-1.4555	0.0189873	0.0781616	1	3621	tags=31%, list=19%, signal=38%
GO_POSITIVE_REGULATION_OF_CARDIAC_MUSCLE_TISSUE_DEVELOPMENT	44	-0.487757	-1.45511	0.0278087	0.078396	1	3374	tags=36%, list=18%, signal=44%
GO_ACTIN_FILAMENT_DEPOLYMERIZATION	58	-0.463322	-1.45462	0.0143488	0.0787104	1	4619	tags=41%, list=24%, signal=54%
GO_CARDIAC_MUSCLE_CELL_PROLIFERATION	51	-0.475835	-1.45442	0.0284775	0.0787766	1	4491	tags=39%, list=24%, signal=51%
GO_REGULATION_OF_SODIUM_ION_TRANSMEMBRANE_TRANSPORT	64	-0.468377	-1.45386	0.00855615	0.0790811	1	4590	tags=38%, list=24%, signal=49%
GO_CHONDROCYTE_DIFFERENTIATION	106	-0.442343	-1.45288	0.00715746	0.0796668	1	5366	tags=46%, list=28%, signal=64%
GO_EMBRYONIC_ORGAN_DEVELOPMENT	446	-0.416469	-1.45285	0	0.0796541	1	3781	tags=30%, list=20%, signal=37%
GO_POSITIVE_REGULATION_OF_TRANSMEMBRANE_RECEPTOR_PROTEIN_SERINE_THREONINE_KINASE_SIGNALING_PATHWAY	107	-0.441198	-1.45283	0.00721649	0.0796236	1	4142	tags=36%, list=22%, signal=45%
GO_RESPONSE_TO_CALCIUM_ION	145	-0.432727	-1.45242	0.00706357	0.0798659	1	3289	tags=27%, list=17%, signal=32%
GO_NEGATIVE_REGULATION_OF_STRESS_ACTIVATED_PROTEIN_KINASE_SIGNALING_CASCADE	46	-0.484965	-1.45205	0.0290179	0.080037	1	4009	tags=39%, list=21%, signal=49%
GO_WATER_HOMEOSTASIS	79	-0.454462	-1.45187	0.01875	0.0801155	1	5114	tags=38%, list=27%, signal=52%
GO_RENAL_WATER_HOMEOSTASIS	37	-0.502202	-1.45183	0.0300231	0.0801093	1	4705	tags=41%, list=25%, signal=54%
GO_RESPONSE_TO_BMP	162	-0.429541	-1.45128	0.0010101	0.0804112	1	4746	tags=38%, list=25%, signal=50%
GO_NEGATIVE_REGULATION_OF_CELL_MATRIX_ADHESION	38	-0.486891	-1.45092	0.0332951	0.0806118	1	3840	tags=42%, list=20%, signal=53%
GO_OXIDOREDUCTASE_ACTIVITY_ACTING_ON_PAIRED_DONORS_WITH_INCORPORATION_OR_REDUCTION_OF_MOLECULAR_OXYGEN_NAD_P_H_AS_ONE_DONOR_AND_INCORPORATION_OF_ONE_ATOM_OF_OXYGEN	45	-0.485313	-1.45069	0.0346369	0.0807359	1	4619	tags=42%, list=24%, signal=56%
GO_CELLULAR_RESPONSE_TO_DRUG	69	-0.456583	-1.45029	0.0117773	0.0809533	1	4171	tags=32%, list=22%, signal=41%
GO_VASCULAR_ASSOCIATED_SMOOTH_MUSCLE_CELL_MIGRATION	22	-0.543999	-1.45023	0.0406404	0.0809652	1	2940	tags=32%, list=15%, signal=38%
GO_NEGATIVE_REGULATION_OF_WNT_SIGNALING_PATHWAY	211	-0.425882	-1.45005	0.00100604	0.0810655	1	4655	tags=37%, list=24%, signal=48%
GO_NEGATIVE_REGULATION_OF_TRANSFERASE_ACTIVITY	280	-0.419675	-1.45001	0	0.0810568	1	4232	tags=35%, list=22%, signal=44%
GO_ANIMAL_ORGAN_MATURATION	26	-0.531025	-1.4498	0.0424757	0.0811406	1	4568	tags=50%, list=24%, signal=66%
GO_MYD88_DEPENDENT_TOLL_LIKE_RECEPTOR_SIGNALING_PATHWAY	36	-0.492038	-1.44977	0.0327684	0.0811235	1	3542	tags=42%, list=19%, signal=51%
GO_ENDOCARDIAL_CUSHION_DEVELOPMENT	45	-0.483835	-1.44897	0.0372041	0.0816353	1	2930	tags=31%, list=15%, signal=37%
GO_ACTIN_MEDIATED_CELL_CONTRACTION	118	-0.434371	-1.44842	0.00814664	0.0819492	1	3262	tags=29%, list=17%, signal=35%
GO_PANCREAS_DEVELOPMENT	73	-0.447315	-1.44827	0.0189274	0.0820164	1	3106	tags=32%, list=16%, signal=38%
GO_ENDOCYTIC_VESICLE	295	-0.420092	-1.44804	0	0.0821689	1	4001	tags=32%, list=21%, signal=40%
GO_WW_DOMAIN_BINDING	30	-0.515195	-1.44719	0.045509	0.0827391	1	2614	tags=27%, list=14%, signal=31%
GO_VENTRICULAR_SEPTUM_MORPHOGENESIS	41	-0.498085	-1.44537	0.0287929	0.0838911	1	6357	tags=63%, list=33%, signal=95%
GO_SEGMENTATION	99	-0.443076	-1.44387	0.00842105	0.0849527	1	3588	tags=28%, list=19%, signal=35%
GO_SMAD_PROTEIN_SIGNAL_TRANSDUCTION	77	-0.447986	-1.44381	0.0168067	0.0849575	1	3761	tags=35%, list=20%, signal=44%
GO_CALCINEURIN_MEDIATED_SIGNALING	49	-0.473441	-1.44367	0.0285401	0.0850256	1	3106	tags=31%, list=16%, signal=36%
GO_SPECIFIC_GRANULE_MEMBRANE	90	-0.442592	-1.44362	0.0215385	0.0850258	1	4173	tags=36%, list=22%, signal=45%
GO_POSITIVE_REGULATION_OF_APOPTOTIC_SIGNALING_PATHWAY	174	-0.422724	-1.44289	0.00100503	0.08539	1	4173	tags=31%, list=22%, signal=39%
GO_REGULATION_OF_PROTEIN_POLYMERIZATION	228	-0.417559	-1.44279	0.00100402	0.0854205	1	2473	tags=24%, list=13%, signal=27%
GO_NEGATIVE_REGULATION_OF_SMALL_GTPASE_MEDIATED_SIGNAL_TRANSDUCTION	59	-0.460391	-1.44272	0.0269687	0.0854308	1	5347	tags=47%, list=28%, signal=66%
GO_ACTIN_BASED_CELL_PROJECTION	217	-0.420276	-1.44268	0	0.0854246	1	4425	tags=32%, list=23%, signal=42%
GO_POSITIVE_REGULATION_OF_NERVOUS_SYSTEM_PROCESS	64	-0.458885	-1.4426	0.0183387	0.085399	1	4772	tags=36%, list=25%, signal=48%
GO_INOSITOL_PHOSPHATE_METABOLIC_PROCESS	72	-0.463771	-1.44244	0.0128617	0.0854386	1	3787	tags=38%, list=20%, signal=47%
GO_TRANSFORMING_GROWTH_FACTOR_BETA_RECEPTOR_SIGNALING_PATHWAY	186	-0.428059	-1.44242	0	0.0854167	1	3761	tags=31%, list=20%, signal=38%
GO_REGULATION_OF_OSTEOCLAST_DIFFERENTIATION	67	-0.45984	-1.4424	0.0211416	0.085388	1	5950	tags=52%, list=31%, signal=76%
GO_NEGATIVE_REGULATION_OF_TYPE_I_INTERFERON_PRODUCTION	45	-0.478451	-1.44211	0.0257559	0.0855622	1	3316	tags=36%, list=17%, signal=43%
GO_REGULATION_OF_STEM_CELL_PROLIFERATION	68	-0.456875	-1.44197	0.0170394	0.0856299	1	3569	tags=29%, list=19%, signal=36%
GO_POSITIVE_REGULATION_OF_INTRINSIC_APOPTOTIC_SIGNALING_PATHWAY	57	-0.472219	-1.44176	0.0249729	0.0856725	1	5337	tags=49%, list=28%, signal=68%
GO_REGULATION_OF_ANION_TRANSMEMBRANE_TRANSPORT	32	-0.509126	-1.4413	0.0323353	0.0859969	1	3712	tags=31%, list=19%, signal=39%
GO_POSITIVE_REGULATION_OF_PLASMA_MEMBRANE_BOUNDED_CELL_PROJECTION_ASSEMBLY	104	-0.43477	-1.44093	0.00619835	0.0862407	1	3225	tags=33%, list=17%, signal=39%
GO_HOMOPHILIC_CELL_ADHESION_VIA_PLASMA_MEMBRANE_ADHESION_MOLECULES	167	-0.423433	-1.44023	0.0030303	0.0867512	1	6853	tags=50%, list=36%, signal=78%
GO_PEPTIDE_BINDING	285	-0.41767	-1.44004	0	0.0867668	1	4614	tags=35%, list=24%, signal=46%
GO_MYOTUBE_CELL_DEVELOPMENT	35	-0.498298	-1.43979	0.0425532	0.0869276	1	4356	tags=37%, list=23%, signal=48%
GO_NEUTRAL_LIPID_BIOSYNTHETIC_PROCESS	45	-0.480952	-1.43968	0.0378619	0.0869368	1	5842	tags=53%, list=31%, signal=77%
GO_ACTIVATION_OF_MAPK_ACTIVITY	156	-0.427289	-1.4394	0.00303644	0.0870943	1	3992	tags=34%, list=21%, signal=43%
GO_EXTRINSIC_COMPONENT_OF_MEMBRANE	304	-0.415083	-1.43861	0	0.0876104	1	4173	tags=33%, list=22%, signal=41%
GO_ACTIN_FILAMENT_BASED_MOVEMENT	148	-0.427496	-1.43806	0.00506073	0.0878927	1	3287	tags=30%, list=17%, signal=36%
GO_STEROID_DEHYDROGENASE_ACTIVITY	34	-0.496607	-1.43769	0.0468384	0.0881407	1	1799	tags=21%, list=9%, signal=23%
GO_BONE_GROWTH	31	-0.502536	-1.43759	0.0413223	0.0881812	1	2237	tags=26%, list=12%, signal=29%
GO_MATERNAL_PROCESS_INVOLVED_IN_FEMALE_PREGNANCY	63	-0.460884	-1.43715	0.0214592	0.0884824	1	2902	tags=30%, list=15%, signal=35%
GO_REGULATION_OF_ERBB_SIGNALING_PATHWAY	94	-0.438969	-1.43705	0.0104058	0.0884623	1	5337	tags=41%, list=28%, signal=57%
GO_RESPONSE_TO_HYDROGEN_PEROXIDE	133	-0.428367	-1.43671	0.00405269	0.0886923	1	4922	tags=40%, list=26%, signal=53%
GO_PATHWAY_RESTRICTED_SMAD_PROTEIN_PHOSPHORYLATION	63	-0.45236	-1.43671	0.0214823	0.0886494	1	3761	tags=35%, list=20%, signal=43%
GO_NEGATIVE_REGULATION_OF_MUSCLE_CONTRACTION	24	-0.528218	-1.43656	0.0455636	0.0886929	1	4664	tags=46%, list=24%, signal=61%
GO_REGULATION_OF_GTPASE_ACTIVITY	472	-0.410709	-1.43635	0	0.0888261	1	5024	tags=40%, list=26%, signal=52%
GO_MONOAMINE_TRANSPORT	84	-0.442674	-1.43545	0.0114703	0.0894106	1	4727	tags=38%, list=25%, signal=50%
GO_DEFENSE_RESPONSE_TO_VIRUS	255	-0.418603	-1.43543	0	0.0893772	1	4290	tags=32%, list=23%, signal=41%
GO_REGULATION_OF_RAS_PROTEIN_SIGNAL_TRANSDUCTION	193	-0.421603	-1.4347	0.0020141	0.0899188	1	5347	tags=44%, list=28%, signal=61%
GO_LYSOSOMAL_LUMEN	96	-0.437324	-1.43467	0.0154639	0.0898985	1	6890	tags=51%, list=36%, signal=80%
GO_NEGATIVE_REGULATION_OF_DNA_BINDING_TRANSCRIPTION_FACTOR_ACTIVITY	162	-0.422868	-1.43426	0.00301811	0.0901487	1	5378	tags=46%, list=28%, signal=64%
GO_ATRIOVENTRICULAR_VALVE_DEVELOPMENT	26	-0.515698	-1.43401	0.0473225	0.0902646	1	5467	tags=58%, list=29%, signal=81%
GO_DIVALENT_INORGANIC_CATION_TRANSPORT	468	-0.409231	-1.43354	0	0.0905983	1	5086	tags=36%, list=27%, signal=47%
GO_LAMELLIPODIUM	200	-0.421169	-1.4331	0	0.0909061	1	4417	tags=33%, list=23%, signal=43%
GO_POSITIVE_REGULATION_OF_GTPASE_ACTIVITY	400	-0.410945	-1.43277	0	0.0910099	1	5024	tags=40%, list=26%, signal=53%
GO_SOMITOGENESIS	69	-0.45333	-1.43232	0.0224599	0.0913198	1	3546	tags=29%, list=19%, signal=35%
GO_CELLULAR_RESPONSE_TO_LIPOPROTEIN_PARTICLE_STIMULUS	31	-0.502283	-1.43201	0.0367299	0.0914901	1	4928	tags=45%, list=26%, signal=61%
GO_POSITIVE_REGULATION_OF_PROTEOLYSIS	358	-0.41293	-1.43069	0	0.0923849	1	4616	tags=36%, list=24%, signal=47%
GO_POSITIVE_REGULATION_OF_HEART_GROWTH	37	-0.495454	-1.42994	0.0394588	0.0929275	1	3374	tags=38%, list=18%, signal=46%
GO_POSITIVE_REGULATION_OF_LEUKOCYTE_DEGRANULATION	24	-0.532399	-1.42862	0.0448485	0.093839	1	4482	tags=54%, list=24%, signal=71%
GO_REGULATION_OF_SMOOTH_MUSCLE_CELL_DIFFERENTIATION	30	-0.507262	-1.42862	0.049238	0.0937987	1	2841	tags=37%, list=15%, signal=43%
GO_NEURON_PROJECTION_GUIDANCE	284	-0.412565	-1.42851	0	0.0938389	1	4632	tags=36%, list=24%, signal=46%
GO_PURINE_CONTAINING_COMPOUND_CATABOLIC_PROCESS	51	-0.459131	-1.42732	0.0319383	0.0946939	1	4465	tags=41%, list=23%, signal=54%
GO_REGULATION_OF_GLUCOSE_TRANSMEMBRANE_TRANSPORT	73	-0.446441	-1.42716	0.0222222	0.094783	1	3859	tags=34%, list=20%, signal=43%
GO_CALCIUM_ION_TRANSMEMBRANE_TRANSPORT	304	-0.41212	-1.42676	0.001002	0.0950882	1	4669	tags=33%, list=25%, signal=43%
GO_POSITIVE_REGULATION_OF_SECRETION	361	-0.412363	-1.42663	0	0.0951536	1	4611	tags=33%, list=24%, signal=42%
GO_CENTRAL_NERVOUS_SYSTEM_PROJECTION_NEURON_AXONOGENESIS	26	-0.523509	-1.42475	0.0454002	0.0965324	1	4296	tags=50%, list=23%, signal=64%
GO_NEPHRON_MORPHOGENESIS	77	-0.44254	-1.42462	0.0229645	0.096598	1	5493	tags=49%, list=29%, signal=69%
GO_TUMOR_NECROSIS_FACTOR_RECEPTOR_BINDING	31	-0.511385	-1.42348	0.0357968	0.0974299	1	4838	tags=55%, list=25%, signal=73%
GO_REGULATION_OF_CELLULAR_RESPONSE_TO_TRANSFORMING_GROWTH_FACTOR_BETA_STIMULUS	119	-0.426288	-1.42323	0.0132789	0.0975545	1	4219	tags=33%, list=22%, signal=42%
GO_EPITHELIAL_CELL_MORPHOGENESIS	36	-0.49316	-1.42299	0.0441676	0.0976604	1	3246	tags=36%, list=17%, signal=43%
GO_REGULATION_OF_ACTION_POTENTIAL	51	-0.47045	-1.42283	0.040349	0.09776	1	3324	tags=31%, list=17%, signal=38%
GO_SIGNALING_RECEPTOR_LIGAND_PRECURSOR_PROCESSING	35	-0.495504	-1.42282	0.0416185	0.097721	1	3908	tags=37%, list=21%, signal=47%
GO_RETINA_HOMEOSTASIS	78	-0.444579	-1.42252	0.024109	0.0979115	1	5609	tags=45%, list=29%, signal=63%
GO_PROTEIN_SELF_ASSOCIATION	56	-0.459392	-1.42153	0.0305011	0.0986492	1	3383	tags=29%, list=18%, signal=35%
GO_COCHLEA_MORPHOGENESIS	24	-0.525069	-1.4215	0.0472727	0.0986241	1	4975	tags=54%, list=26%, signal=73%
GO_RUFFLE	179	-0.419979	-1.42045	0.00201816	0.0992306	1	4417	tags=35%, list=23%, signal=45%
GO_MYELOID_CELL_DIFFERENTIATION	417	-0.407203	-1.42028	0	0.0993469	1	4978	tags=39%, list=26%, signal=51%
GO_PROTEASE_BINDING	134	-0.417267	-1.41946	0.0142712	0.0999767	1	4722	tags=36%, list=25%, signal=47%
GO_ARACHIDONIC_ACID_METABOLIC_PROCESS	57	-0.460119	-1.41912	0.0384615	0.10009	1	6455	tags=54%, list=34%, signal=82%
GO_ROOF_OF_MOUTH_DEVELOPMENT	91	-0.431976	-1.41869	0.0198537	0.10032	1	5423	tags=44%, list=28%, signal=61%
GO_LIPID_LOCALIZATION	415	-0.405176	-1.4164	0	0.101999	1	4103	tags=30%, list=22%, signal=38%
GO_ACTIVATION_OF_PROTEIN_KINASE_ACTIVITY	329	-0.40826	-1.41625	0.001	0.102097	1	3992	tags=33%, list=21%, signal=40%
GO_POSITIVE_REGULATION_OF_HORMONE_SECRETION	128	-0.422872	-1.4157	0.0132518	0.102536	1	4961	tags=34%, list=26%, signal=45%
GO_REGULATION_OF_B_CELL_MEDIATED_IMMUNITY	55	-0.463301	-1.41562	0.0359086	0.102559	1	4379	tags=49%, list=23%, signal=64%
GO_PLASMA_MEMBRANE_ORGANIZATION	108	-0.430359	-1.41546	0.0205761	0.102609	1	4250	tags=32%, list=22%, signal=41%
GO_POSITIVE_REGULATION_OF_PROTEIN_POLYMERIZATION	135	-0.419209	-1.41528	0.00918367	0.102727	1	2440	tags=23%, list=13%, signal=26%
GO_STRIATED_MUSCLE_ADAPTATION	44	-0.469398	-1.41512	0.0407489	0.102842	1	5408	tags=45%, list=28%, signal=63%
[truncated: 175 more rows]
