# Supplementary material for: Bioinformatic analysis and experimental validation of six cuproptosis-associated genes as a prognostic signature of breast cancer
Source: PeerJ journal article supplement (doi:10.7717/peerj.17419), 2024-06-18
Supplement: Supplementary_Table_7.xlsx [file Supplementary_Table_7.xlsx]

## Sheet: Sheet1
Supplementary Table 7 The expression of prognostic genes by qRT-PCR.
	MCF-10A	HCC1937	MCF7	MDA-MB-231	f value	p value
CLEC3A	1.0243±0.2836	3.1547±0.0445	3.1123±0.6483	4.6032±1.04902	12.3	0.0057
KRT17	1.0037±0.1033	0.2554±0.0189	0.6687±0.0487	0.5169±0.0826	82.01	<0.0001
SAA1	1.0014±0.0614	0.6064±0.2249	0.2184±0.0065	0.0271±0.0150	35.24	0.0003
TFF1	1.0001±0.0137	0.1369±0.0077	0.0835±0.0068	0.1236±0.0097	6034	<0.0001
IGHG1	1.0010±0.0546	6.6614±2.6729	4.0284±0.6196	5.3460±0.3566	9.092	0.0199
VAV3	1.0004±0.0341	0.4295±0.0760	0.3164±0.0085	0.0259±0.0091	395.5	<0.0001
