# Supplementary material for: Bioinformatic analysis and experimental validation of six cuproptosis-associated genes as a prognostic signature of breast cancer
Source: PeerJ journal article supplement (doi:10.7717/peerj.17419), 2024-06-18
Supplement: Supplementary_Table_8.xlsx [file Supplementary_Table_8.xlsx]

## Sheet: Sheet1
Supplementary Table 8 The amplification and dissolution curves of prognostic genes
						CLEC3A
						KRT17
						SAA1
						TFF1
						IGHG1
						VAV3
						GAPDH
